# Supplementary material for: Decoding lignin valorization pathways in the extremophilicBacillus ligniniphilusL1 for vanillin biosynthesis
Source: Royal Society of Chemistry journal article supplement (doi:10.1039/d1gc02692e), 2021-01-01
Supplement: d1gc02692e2.xlsx [file d1gc02692e2.xlsx]

## Sheet: express
#Gene	Length	Function	read_Lignin	RPKM_Mu	read_Glucose	RPKM_Pu	log2(Fold_change)	p_value	q-value	Result
BLT_RS0118235	1182	hypothetical protein	649	88.6528	392	52.2056	0.76396	4.09814e-17	8.36703e-17
BLT_RS0116370	1089	hypothetical protein	322	47.7412	114	16.4788	1.53462	2.19015e-25	5.22011e-25	up
BLT_RS0107560	987	hypothetical protein	1184	193.687	1266	201.913	-0.0600128	0.303318	0.330948
BLT_RS0100380	1089	hypothetical protein	134	19.8674	202	29.1993	-0.555527	0.000478288	0.00065502
BLT_RS0106270	795	inorganic polyphosphate/ATP-NAD kinase	134	27.2146	97	19.2067	0.502772	0.00850564	0.0106795
BLT_RS0118325	1035	phosphoribosylaminoimidazole synthetase	264	41.184	947	144.032	-1.80623	3.1379e-87	1.33026e-86	down
BLT_RS0102460	1497	hypothetical protein	65	7.01062	64	6.72987	0.0589634	0.816456	0.831665
BLT_RS0119370	819	positive regulator of sigma-B activity	535	105.471	741	142.424	-0.433339	9.82566e-08	1.56555e-07
BLT_RS0117195	1407	hypothetical protein	674	77.3448	481	53.8145	0.523307	9.31278e-10	1.57495e-09
BLT_RS0100410	1041	hypothetical protein	528	81.8933	1038	156.962	-0.938601	5.93547e-36	1.62869e-35
BLT_RS0108405	1149	1-deoxy-D-xylulose 5-phosphate reductoisomerase	643	90.3558	262	35.8947	1.33185	6.2202e-40	1.80808e-39	up
BLT_RS0104725	1779	excinuclease ABC subunit C	1971	178.886	1918	169.715	0.0759206	0.100774	0.115288
BLT_RS0118885	1860	hypothetical protein	7048	611.812	873	73.8839	3.04976	0	0	up
BLT_RS0102240	195	hypothetical protein	15	12.42	4	3.22904	1.94349	0.00801991	0.0101032
BLT_RS0108590	774	hypothetical protein	281	58.6179	613	124.672	-1.08872	1.57101e-27	3.85148e-27	down
BLT_RS0109365	906	hypothetical protein	121	21.5636	21	3.64871	2.56314	4.6728e-19	9.92148e-19	up
BLT_RS0107190	543	C4-dicarboxylate ABC transporter	176	52.3333	633	183.507	-1.81003	4.35806e-59	1.50301e-58	down
BLT_RS0117240	297	hypothetical protein	91	49.4709	23	12.1905	2.02083	2.08939e-11	3.72732e-11	up
BLT_RS0110650	1401	hypothetical protein	4511	519.876	1362	153.034	1.76432	0	0	up
BLT_RS0120125	381	hypothetical protein	374	158.494	978	404.076	-1.3502	1.45924e-59	5.0604e-59	down
BLT_RS0115295	1521	hypothetical protein	984	104.455	2211	228.828	-1.13137	1.13371e-100	5.15981e-100	down
BLT_RS0108080	273	30S ribosomal protein S16	3519	2081.24	5431	3131.6	-0.589457	2.0928e-81	8.49048e-81
BLT_RS0108085	231	hypothetical protein	2140	1495.78	1596	1087.6	0.459746	3.36366e-22	7.59038e-22
BLT_RS0113155	1152	sulfate adenylyltransferase	21405	3000.05	2166	295.975	3.34144	0	0	up
BLT_RS21465	2075	hypothetical protein	92	7.15871	90	6.82768	0.0683044	0.74945	0.767972
BLT_RS0112370	732	ribosomal large subunit pseudouridine synthase B	358	78.9654	128	27.5263	1.52041	1.10792e-27	2.72681e-27	up
BLT_RS0115735	702	hypothetical protein	877	201.71	252	56.5083	1.83575	9.02675e-85	3.76331e-84	up
BLT_RS0100320	2616	hypothetical protein	656	40.4884	351	21.1212	0.93882	6.74192e-24	1.57214e-23
BLT_RS0110440	294	hypothetical protein	448	246.034	35	18.74	3.71467	2.81103e-92	1.23757e-91	up
BLT_RS0120700	363	50S ribosomal protein L7/L12	897	398.98	2572	1115.35	-1.48312	1.28577e-176	8.30687e-176	down
BLT_RS0102440	540	hypothetical protein	21	6.279	42	12.2435	-0.963404	0.0100709	0.012582
BLT_RS0105605	441	hypothetical protein	110	40.2735	34	12.1364	1.73049	3.28672e-11	5.8165e-11	up
BLT_RS0102320	888	UTP--glucose-1-phosphate uridylyltransferase	327	59.4566	90	15.9543	1.89789	3.76652e-34	1.01508e-33	up
BLT_RS0100395	1041	hypothetical protein	1069	165.803	382	57.7645	1.52121	2.96519e-79	1.17641e-78	up
BLT_RS0111185	1425	hypothetical protein	5530	626.578	5426	599.396	0.063986	0.020221	0.0246906
BLT_RS0103145	1308	Fe-S cluster assembly protein SufD	5074	626.337	4960	596.929	0.0693789	0.0159719	0.0196805
BLT_RS0103710	204	hypothetical protein	28	22.1612	15	11.5747	0.93706	0.0375937	0.0448722
BLT_RS0118735	753	hypothetical protein	54	11.5788	40	8.36207	0.469555	0.116643	0.132598
BLT_RS0106015	954	hypothetical protein	349	59.0666	1055	174.082	-1.55935	4.4257e-79	1.75033e-78	down
BLT_RS0112740	1008	chemotaxis protein	494	79.1282	293	45.7568	0.790206	4.19109e-14	8.01063e-14
BLT_RS0111160	1335	hypothetical protein	3758	454.507	1613	190.196	1.25681	2.83427e-205	1.99509e-204	up
BLT_RS0106020	192	hypothetical protein	175	147.164	632	518.161	-1.81597	2.96663e-59	1.02501e-58	down
BLT_RS0110510	186	hypothetical protein	14	12.1529	5	4.23161	1.52202	0.0309385	0.0372288
BLT_RS0116285	1821	hypothetical protein	387	34.3136	215	18.5856	0.884592	1.78373e-13	3.35996e-13
BLT_RS0120960	885	pyridoxal biosynthesis protein	1132	206.523	1386	246.529	-0.255458	9.33937e-06	1.38024e-05
BLT_RS0108645	1440	hypothetical protein	470	52.6988	590	64.4968	-0.291459	0.00104401	0.0014013
BLT_RS21285	1062	hypothetical protein	1208	183.657	360	53.3613	1.78315	1.41434e-111	6.8152e-111	up
BLT_RS0101710	1617	hypothetical protein	118	11.7825	113	11.0006	0.0990596	0.601839	0.627449
BLT_RS0114100	1122	GPR endopeptidase	450	64.7567	561	78.708	-0.28148	0.00198348	0.0026121
BLT_RS0109970	243	hypothetical protein	56	37.2089	25	16.1951	1.20009	0.000320516	0.000443782	up
BLT_RS0108240	1251	hypothetical protein	1150	148.424	651	81.9167	0.8575	4.08882e-35	1.11387e-34
BLT_RS0108385	270	uridylate kinase	76	45.448	99	57.7192	-0.344834	0.115447	0.131279
BLT_RS0102395	1041	transcriptional regulator	5147	798.304	8176	1236.34	-0.631068	3.88962e-137	2.14869e-136
BLT_RS0120440	702	hypothetical protein	1140	262.2	21	4.70902	5.7991	7.84385e-274	6.77228e-273	up
BLT_RS0112375	537	spore maturation protein	86	25.8577	98	28.7277	-0.15185	0.475758	0.504507
BLT_RS0106570	969	membrane protein	5819	969.593	13532	2198.3	-1.18094	0	0	down
BLT_RS0117830	1095	hypothetical protein	577	85.0799	357	51.3219	0.729243	2.63445e-14	5.06099e-14
BLT_RS21145	225	fructose-bisphosphate aldolase	122	87.5472	89	62.2667	0.491599	0.0139057	0.0171908
BLT_RS0118075	756	hypothetical protein	54	11.5329	15	3.12333	1.88459	8.30905e-07	1.27855e-06
BLT_RS0117080	330	hypothetical protein	198	96.876	283	134.996	-0.478706	0.000306091	0.000424589
BLT_RS22340	1050	hypothetical protein	153	23.527	41	6.14672	1.93643	2.98928e-17	6.12965e-17	up
BLT_RS0114970	477	transcription elongation factor GreA	328	111.025	1016	335.293	-1.59454	1.11992e-78	4.42457e-78	down
BLT_RS0120585	540	50S ribosomal protein L5	3934	1176.27	1303	379.839	1.63076	0	0	up
BLT_RS0112010	289	stage IV sporulation protein A	338	188.836	217	118.198	0.675924	4.97247e-08	8.00389e-08
BLT_RS0108570	1290	hypothetical protein	842	105.387	267	32.5814	1.69358	4.91596e-73	1.86037e-72	up
BLT_RS0119665	1251	hypothetical protein	696	89.8291	207	26.0472	1.78605	3.14815e-65	1.13339e-64	up
BLT_RS0120020	597	anthranilate synthase subunit II	3900	1054.76	1068	281.608	1.90516	0	0	up
BLT_RS0116940	468	peroxiredoxin	85	29.325	44	14.7998	0.986555	0.000155859	0.000219096
BLT_RS0115120	1281	histidyl-tRNA synthetase	1225	154.402	309	37.9715	2.0237	1.12407e-133	6.0848e-133	up
BLT_RS0101970	1056	GDP-mannose 4,6-dehydratase	695	106.264	739	110.161	-0.0519658	0.495295	0.523752
BLT_RS0117725	756	DeoR family transcriptional regulator	318	67.9157	411	85.5793	-0.333516	0.0018816	0.00248226
BLT_RS21705	567	hypothetical protein	1593	453.626	1172	325.382	0.479369	3.74671e-18	7.83611e-18
BLT_RS0112150	1794	homocysteine methyltransferase	2132	191.88	384	33.6944	2.50962	9.90656e-300	9.48666e-299	up
BLT_RS0102880	732	1-(5-phosphoribosyl)-5-[(5- phosphoribosylamino)methylideneamino] imidazole-4-carboxamide isomerase	240	52.9377	283	60.8589	-0.201172	0.111417	0.127002
BLT_RS0101675	786	hypothetical protein	653	134.139	1873	375.115	-1.4836	3.20072e-129	1.69611e-128	down
BLT_RS0118260	690	geranylgeranylglyceryl phosphate synthase	104	24.336	17	3.87836	2.64957	3.72539e-17	7.61837e-17	up
BLT_RS0114650	246	hypothetical protein	356	233.658	4	2.55961	6.51233	1.30986e-85	5.49123e-85	up
BLT_RS0118465	210	hypothetical protein	25	19.2214	62	46.4752	-1.27374	8.95204e-05	0.000127073	down
BLT_RS0104095	321	thioredoxin	349	175.544	359	176.051	-0.00416127	0.969389	0.971191
BLT_RS21850	234	hypothetical protein	62	42.78	156	104.944	-1.29461	3.11628e-10	5.35172e-10	down
BLT_RS0120415	438	hypothetical protein	1578	581.698	231	83.0207	2.80873	7.40858e-251	6.07664e-250	up
BLT_RS0113050	459	hypothetical protein	98	34.4729	254	87.1103	-1.33738	1.81291e-16	3.66369e-16	down
BLT_RS0109495	375	cobalamin adenosyltransferase	891	383.629	472	198.134	0.953234	1.19994e-32	3.16598e-32
BLT_RS0120380	1626	hypothetical protein	429	42.5992	72	6.97045	2.6115	1.37812e-64	4.94733e-64	up
BLT_RS0104680	414	membrane protein	544	212.16	432	164.26	0.369171	6.77034e-05	9.67229e-05
BLT_RS0101070	546	hypothetical protein	161	47.61	222	64.0043	-0.426903	0.00401316	0.00516956
BLT_RS0108565	729	GntR family transcriptional regulator	427	94.5726	94	20.2978	2.2201	1.57039e-53	5.13882e-53	up
BLT_RS0104275	462	spore protein	221	77.2352	167	56.9014	0.440794	0.00274753	0.00357833
BLT_RS0120725	195	preprotein translocase subunit SecE	909	752.652	270	217.961	1.78792	9.71171e-85	4.0444e-84	up
BLT_RS0109370	1116	hypothetical protein	158	22.859	31	4.37266	2.38618	1.31254e-22	2.98326e-22	up
BLT_RS0111605	477	hypothetical protein	1443	488.442	773	255.1	0.937127	2.14164e-50	6.82466e-50
BLT_RS0111350	1059	nitrate ABC transporter substrate-binding protein	96	14.6366	106	15.7565	-0.106362	0.600545	0.626446
BLT_RS21565	195	XRE family transcriptional regulator	19	15.732	16	12.9162	0.284523	0.560349	0.586951
BLT_RS22595	336	hypothetical protein	347	166.746	287	134.459	0.31048	0.0068614	0.0086931
BLT_RS0117715	1884	PTS fructose transporter subunit IIC	905	77.5591	2298	192.007	-1.30779	6.48746e-131	3.47194e-130	down
BLT_RS0115445	582	transcriptional regulator	5834	1618.48	10690	2891.37	-0.837109	1.88754e-291	1.7498e-290
BLT_RS0111170	960	ABC transporter permease	2263	380.608	1936	317.455	0.261753	4.33961e-09	7.22885e-09
BLT_RS0101150	402	F0F1 ATP synthase subunit epsilon	1163	467.11	726	284.288	0.716405	1.83893e-26	4.43625e-26
BLT_RS0113235	189	hypothetical protein	40	34.1714	8	6.66311	2.35852	1.0114e-06	1.54776e-06	up
BLT_RS0108355	315	hypothetical protein	287	147.108	141	70.4624	1.06195	1.55122e-13	2.92784e-13	up
BLT_RS0117130	297	hypothetical protein	4038	2195.2	12115	6421.19	-1.54849	0	0	down
BLT_RS0104780	843	hypothetical protein	868	166.248	993	185.426	-0.157503	0.0186513	0.0228552
BLT_RS0111590	945	MBL fold metallo-hydrolase	221	37.7594	313	52.1388	-0.465521	0.000215176	0.000300355
BLT_RS0105680	297	hypothetical protein	461	250.616	1026	543.801	-1.1176	8.40539e-47	2.59522e-46	down
BLT_RS21625	663	hypothetical protein	846	206.026	324	76.9272	1.42126	3.3241e-57	1.12888e-56	up
BLT_RS0100435	594	3-methyladenine DNA glycosylase	209	56.81	380	100.704	-0.825901	1.07625e-11	1.93091e-11
BLT_RS0101035	627	hypothetical protein	121	31.159	89	22.3445	0.479725	0.0166047	0.0204337
BLT_RS0117920	1908	threonyl-tRNA synthetase	376	31.8181	52	4.29016	2.89074	5.22007e-63	1.86156e-62	up
BLT_RS0108805	624	XRE family transcriptional regulator	21055	5447.98	8819	2224.76	1.29207	0	0	up
BLT_RS0115150	333	hypothetical protein	158	76.6087	125	59.0901	0.374592	0.0295088	0.0355822
BLT_RS0112990	783	hypothetical protein	275	56.7069	797	160.231	-1.49855	7.05242e-57	2.38644e-56	down
BLT_RS0104855	1023	ketol-acid reductoisomerase	22236	3509.51	3032	466.554	2.91115	0	0	up
BLT_RS0110705	1107	hypothetical protein	173	25.2327	144	20.4769	0.301299	0.063542	0.0742701
BLT_RS0111295	423	hypothetical protein	29053	11089.6	44988	16741.9	-0.594258	0	0
BLT_RS0116055	273	hypothetical protein	36	21.2914	13	7.496	1.50608	0.000595818	0.000811561	up
BLT_RS0119695	729	hypothetical protein	48	10.6311	20	4.31868	1.29963	0.000391395	0.000538365
BLT_RS0119685	1713	hypothetical protein	957	90.2027	705	64.7859	0.477491	1.97227e-11	3.52339e-11
BLT_RS0113620	624	hypothetical protein	1212	313.605	393	99.1418	1.66138	1.51368e-101	6.94783e-101	up
BLT_RS0101230	1017	NADH:ubiquinone oxidoreductase subunit L	96	15.2411	107	16.562	-0.119909	0.554056	0.581166
BLT_RS0101440	312	hypothetical protein	102	52.785	178	89.8078	-0.766713	1.28675e-05	1.89127e-05
BLT_RS22695	180	hypothetical protein	20	17.94	1	0.874533	4.35852	6.24916e-06	9.29369e-06
BLT_RS0107110	453	hypothetical protein	502	178.925	211	73.3218	1.28704	5.20418e-30	1.33302e-29	up
BLT_RS0112435	531	hypothetical protein	94	28.5824	107	31.7203	-0.150283	0.460709	0.490202
BLT_RS0103160	1398	Fe-S cluster assembly protein SufB	11958	1381.07	19205	2162.5	-0.64691	0	0
BLT_RS0117245	897	hypothetical protein	244	43.92	42	7.37065	2.57502	5.98559e-37	1.66301e-36	up
BLT_RS0114305	201	cold-shock protein	6791	5455.1	4277	3349.59	0.70362	1.52406e-141	8.55693e-141
BLT_RS0116340	216	hypothetical protein	167	124.833	25	18.2194	2.77644	7.49078e-28	1.84965e-27	up
BLT_RS0119820	1431	MFS transporter	2777	313.33	577	63.4724	2.30348	0	0	up
BLT_RS0104300	840	hypothetical protein	679	130.514	1664	311.833	-1.25658	1.05797e-89	4.59878e-89	down
BLT_RS0109835	2145	hypothetical protein	16571	1247.34	21239	1558.67	-0.32146	1.34031e-103	6.2355e-103
BLT_RS0116500	1212	hypothetical protein	410	54.6193	241	31.3014	0.803186	2.95183e-12	5.35703e-12
BLT_RS0109800	903	hypothetical protein	426	76.1705	145	25.2772	1.5914	9.36708e-35	2.54625e-34	up
BLT_RS0102185	759	hypothetical protein	59	12.5509	180	37.3318	-1.57261	5.07616e-15	9.94928e-15	down
BLT_RS0118630	333	hypothetical protein	25	12.1216	14	6.61809	0.873097	0.0641686	0.0749677
BLT_RS0109355	621	hypothetical protein	245	63.7	106	26.8697	1.24531	9.28227e-15	1.80433e-14	up
BLT_RS0119765	309	transcriptional regulator	2344	1224.8	264	134.491	3.18696	0	0	up
BLT_RS21330	218	hypothetical protein	49	36.2915	45	32.4941	0.159452	0.592259	0.618316
BLT_RS0113780	864	membrane protein	8614	1609.74	7805	1422.03	0.17888	1.94913e-15	3.85634e-15
BLT_RS0110125	1116	hypothetical protein	538	77.8365	217	30.6087	1.34651	3.10938e-34	8.39176e-34	up
BLT_RS0115800	741	hypothetical protein	162	35.299	167	35.477	-0.00725875	0.963605	0.966422
BLT_RS0110145	333	hypothetical protein	878	425.711	171	80.8352	2.39682	2.53912e-118	1.2622e-117	up
BLT_RS0114495	405	hypothetical protein	586	233.619	11	4.27549	5.77192	9.04412e-142	5.09305e-141	up
BLT_RS0107760	714	DNA-directed RNA polymerase sigma-70 factor	120	27.1361	96	21.1652	0.358524	0.0686689	0.0799654
BLT_RS0101740	180	hypothetical protein	7	6.279	0.5	0.437266	3.84395	0.00996476	0.0124617
BLT_RS0110020	1176	8-amino-7-oxononanoate synthase	58	7.96317	98	13.118	-0.720133	0.00217791	0.00286016
BLT_RS0115680	507	ferritin	1526	485.972	2553	792.668	-0.705843	2.48788e-53	8.12708e-53
BLT_RS0109550	936	amidohydrolase	5475	944.438	391	65.7582	3.84421	0	0	up
BLT_RS22165	351	hypothetical protein	4	1.84	1	0.448478	2.0366	0.158033	0.177405
BLT_RS0110605	681	ribose 5-phosphate isomerase A	52	12.3288	33	7.62808	0.692641	0.0288831	0.0348835
BLT_RS0101760	1665	sulfate:proton symporter	3667	355.6	57	5.38901	6.04409	0	0	up
BLT_RS22275	240	transposase	40	26.91	27	17.7093	0.603636	0.0898605	0.103241
BLT_RS0117165	1227	hypothetical protein	484	63.6892	1215	155.876	-1.29128	8.76864e-69	3.23087e-68	down
BLT_RS0114810	219	hypothetical protein	392	289.006	102	73.317	1.97888	8.14925e-43	2.43638e-42	up
BLT_RS0101065	1053	hypothetical protein	56	8.58667	23	3.43833	1.32039	0.000105698	0.000149699
BLT_RS0116050	246	hypothetical protein	2	1.31268	5	3.19951	-1.28533	0.262576	0.288833
BLT_RS0121085	187	hypothetical protein	0.5	0.431711	0.5	0.420898	0.0365955	1	1
BLT_RS0109625	645	hypothetical protein	207	51.8174	203	49.5433	0.0647466	0.649556	0.674401
BLT_RS0105590	897	arginase	366	65.88	395	69.3192	-0.0734135	0.482882	0.511629
BLT_RS0113900	759	DNA repair protein RecO	3220	684.982	16615	3445.94	-2.33076	0	0	down
BLT_RS0100645	1410	PTS sugar transporter	294	33.6661	575	64.1944	-0.93115	2.14688e-20	4.68219e-20
BLT_RS0113275	657	arginine ABC transporter permease	602	147.944	188	45.0444	1.71563	1.12651e-53	3.70237e-53	up
BLT_RS0118995	417	hypothetical protein	233	90.2163	272	102.679	-0.186681	0.146546	0.165248
BLT_RS0105710	1095	urea ABC transporter permease	43	6.34044	32	4.60028	0.46286	0.167044	0.186965
BLT_RS0102540	333	hypothetical protein	59	28.607	18	8.50897	1.74931	9.84458e-07	1.50806e-06	up
BLT_RS0105730	630	TetR family transcriptional regulator	339	86.8809	646	161.414	-0.893653	2.64427e-21	5.87563e-21
BLT_RS0118080	1176	3-hydroxybenzoate 6-hydroxylase	912	125.214	2806	375.603	-1.58481	5.59276e-212	4.05798e-211	down
BLT_RS0116360	1743	hypothetical protein	532	49.281	148	13.3664	1.88242	6.8681e-54	2.26515e-53	up
BLT_RS0114110	1056	hypothetical protein	2121	324.296	7392	1101.91	-1.76462	0	0	down
BLT_RS0119225	969	hypothetical protein	332	55.3196	188	30.541	0.857046	3.13791e-11	5.55838e-11
BLT_RS0111360	768	nitrate/sulfonate/bicarbonate ABC transporter ATP-binding protein	84	17.6597	155	31.7701	-0.847211	9.17115e-06	1.35644e-05
BLT_RS0120890	1254	PTS galactitol transporter subunit IIC	3638	468.414	4001	502.25	-0.10062	0.00230988	0.00303031
BLT_RS0102330	1341	hypothetical protein	935	112.577	758	88.9793	0.339364	1.3887e-06	2.11614e-06
BLT_RS0115260	882	hypothetical protein	656	120.088	1658	295.913	-1.30108	2.95891e-94	1.31496e-93	down
BLT_RS0115390	396	hypothetical protein	141	57.4896	129	51.2794	0.16492	0.347851	0.376381
BLT_RS0115745	1107	glucose-1-phosphate adenylyltransferase subunit GlgD	1526	222.573	677	96.2697	1.20912	1.23091e-79	4.90416e-79	up
BLT_RS0111065	951	hypothetical protein	721	122.411	1321	218.661	-0.836964	1.32125e-37	3.71188e-37
BLT_RS0103315	303	hypothetical protein	107	57.0172	493	256.126	-2.16738	2.54646e-58	8.71852e-58	down
BLT_RS22335	918	2-hydroxyhepta-2,4-diene-1,7-dioate isomerase	179	31.4829	94	16.1188	0.965822	6.9798e-08	1.11683e-07
BLT_RS0102000	528	hypothetical protein	1428	436.676	1850	551.552	-0.336934	2.7585e-11	4.89089e-11
BLT_RS0102850	1191	ATP phosphoribosyltransferase regulatory subunit	197	26.7067	302	39.9157	-0.579757	9.07398e-06	1.34259e-05
BLT_RS0112710	744	hypothetical protein	525	113.933	529	111.926	0.0256452	0.772908	0.790079
BLT_RS0112045	609	hypothetical protein	224	59.3876	75	19.3862	1.61513	2.00559e-19	4.29704e-19	up
BLT_RS0104335	384	hypothetical protein	128	53.82	193	79.1179	-0.555861	0.000635961	0.00086499
BLT_RS0118135	492	hypothetical protein	441	144.723	32	10.2384	3.82123	1.25057e-92	5.52507e-92	up
BLT_RS0118915	858	hypothetical protein	379	71.3209	103	18.8973	1.91615	8.56628e-40	2.48429e-39	up
BLT_RS21650	987	hypothetical protein	423	69.1972	522	83.2534	-0.266797	0.00458499	0.00588007
BLT_RS0113105	303	MerR family transcriptional regulator	723	385.266	1327	689.409	-0.839505	5.89731e-38	1.67423e-37
BLT_RS0118410	2244	hypothetical protein	191	13.7428	156	10.9434	0.328622	0.0343222	0.0411104
BLT_RS0110070	744	hypothetical protein	97	21.0506	280	59.2426	-1.49277	5.82433e-21	1.2851e-20	down
BLT_RS0101555	1380	hypothetical protein	8347	976.599	2980	339.927	1.52254	0	0	up
BLT_RS0114395	282	hypothetical protein	188	107.64	2	1.11643	6.59118	6.30108e-46	1.9297e-45	up
BLT_RS0119830	867	hypothetical protein	142	26.4444	124	22.5139	0.232146	0.18994	0.211337
BLT_RS0101015	1317	hypothetical protein	574	70.3706	182	21.7538	1.69371	2.25576e-50	7.17622e-50	up
BLT_RS0102895	228	hypothetical protein	22	15.5795	14	9.66589	0.688672	0.157334	0.176673
BLT_RS0120080	1413	tRNA(Ile)-lysidine synthetase	293	33.4804	167	18.6047	0.847648	6.43405e-10	1.09498e-09
BLT_RS0115730	474	inhibitor of MCP methylation protein	410	139.66	238	79.0401	0.821258	1.12131e-12	2.05874e-12
BLT_RS21215	558	hypothetical protein	4003	1158.29	455	128.359	3.17374	0	0	up
BLT_RS0117985	1083	hypothetical protein	1415	210.957	3286	477.626	-1.17893	1.16791e-158	7.01678e-158	down
BLT_RS0108310	2037	flagellar biosynthesis protein FlhA	494	39.1562	979	75.6555	-0.950202	1.12126e-34	3.04574e-34
BLT_RS0103930	573	hypothetical protein	181	51.0022	785	215.657	-2.08011	3.26296e-87	1.38172e-86	down
BLT_RS22770	402	hypothetical protein	1047	420.519	37	14.4885	4.85919	8.43005e-245	6.86967e-244	up
BLT_RS0106995	576	sortase	124	34.7588	45	12.2981	1.49894	2.15331e-10	3.71318e-10	up
BLT_RS0101095	630	uracil phosphoribosyltransferase	163	41.7746	1497	374.05	-3.16253	3.99815e-260	3.3597e-259	down
BLT_RS0105225	360	hypothetical protein	37	16.5945	66	28.8596	-0.798345	0.00594525	0.00757307
BLT_RS0108340	375	hypothetical protein	666	286.753	528	221.642	0.37158	9.19242e-06	1.35905e-05
BLT_RS21785	492	hypothetical protein	2962	972.042	1330	425.535	1.19174	2.39941e-149	1.38636e-148	up
BLT_RS0112205	774	hypothetical protein	406	84.6935	617	125.485	-0.567195	4.97598e-10	8.48368e-10
BLT_RS0110735	1071	luciferase	2638	397.695	688	101.122	1.97556	9.86845e-277	8.599e-276	up
BLT_RS22590	393	hypothetical protein	214	87.9197	233	93.328	-0.0861236	0.528163	0.556481
BLT_RS0114980	1129	protease	1244	177.906	734	102.341	0.79773	1.22573e-33	3.28225e-33
BLT_RS0115500	687	two-component system response regulator	876	205.879	253	57.9712	1.82839	3.18193e-84	1.32218e-83	up
BLT_RS0102635	948	hypothetical protein	977	166.399	3632	603.096	-1.85774	0	0	down
BLT_RS0105285	195	hypothetical protein	7	5.796	3	2.42178	1.25899	0.1865	0.207662
BLT_RS0104840	1668	dihydroxy-acid dehydratase	54485	5274.07	63323	5976.05	-0.180275	1.09755e-102	5.09354e-102
BLT_RS0108680	1743	2-oxoglutarate ferredoxin oxidoreductase subunit alpha	6606	611.936	1355	122.374	2.32208	0	0	up
BLT_RS0119040	774	hydrolase Cof	107	22.3207	97	19.7278	0.17815	0.378121	0.407847
BLT_RS0120270	1218	hypothetical protein	2444	323.981	1676	216.608	0.580818	1.45096e-37	4.07025e-37
BLT_RS0109425	876	hypothetical protein	166	30.5963	70	12.5789	1.28235	6.75943e-11	1.18455e-10	up
BLT_RS0115075	1263	recombinase RarA	812	103.805	2049	255.38	-1.29877	1.02525e-115	5.04337e-115	down
BLT_RS0119870	198	hypothetical protein	4	3.26182	6	4.77018	-0.548367	0.551903	0.579068
BLT_RS0103565	762	hypothetical protein	1174	248.759	8212	1696.46	-2.76971	0	0	down
BLT_RS0116545	813	iron-enterobactin transporter ATP-binding protein	305	60.5723	357	69.1236	-0.190519	0.089816	0.103221
BLT_RS0111250	270	hypothetical protein	628	375.544	1391	810.984	-1.11069	3.30824e-62	1.16982e-61	down
BLT_RS0103720	406	3-hexulose-6-phosphate synthase	312	124.078	55	21.3248	2.54064	4.29774e-46	1.31832e-45	up
BLT_RS0101540	237	hypothetical protein	1291	879.514	358	237.784	1.88705	1.62585e-128	8.5675e-128	up
BLT_RS0115060	1161	hypothetical protein	1046	145.467	423	57.3531	1.34275	1.25423e-64	4.50685e-64	up
BLT_RS0119860	423	hypothetical protein	43	16.4132	19	7.07069	1.21493	0.00145389	0.00192881
BLT_RS0108170	1308	tRNA (uracil-5-)-methyltransferase	1143	141.092	779	93.7515	0.589726	6.69389e-19	1.41411e-18
BLT_RS0116375	336	hypothetical protein	350	168.188	470	220.195	-0.38871	0.000124467	0.00017582
BLT_RS0118205	471	hypothetical protein	75	25.7102	152	50.8009	-0.982513	6.48506e-07	1.00074e-06
BLT_RS0113140	1623	ferredoxin-nitrite reductase	32967	3279.64	4439	430.542	2.92931	0	0	up
BLT_RS0105755	1011	hypothetical protein	1683	268.781	1086	169.094	0.668607	1.91559e-33	5.11141e-33
BLT_RS0115525	1281	hypothetical protein	376	47.3919	919	112.931	-1.25274	3.94888e-50	1.25203e-49	down
BLT_RS0105090	186	XRE family transcriptional regulator	42	36.4587	20	16.9264	1.10698	0.00348843	0.00451057
BLT_RS0117895	480	hypothetical protein	420	141.278	600	196.77	-0.477978	1.52662e-07	2.41608e-07
BLT_RS0118640	624	hypothetical protein	91	23.5463	33	8.32488	1.5	5.24997e-08	8.43978e-08	up
BLT_RS0102720	1191	hypothetical protein	4156	563.416	16321	2157.17	-1.93687	0	0	down
BLT_RS0108505	594	dihydrofolate reductase	1509	410.174	318	84.2732	2.28309	1.09742e-190	7.39388e-190	up
BLT_RS0117115	522	L-2,4-diaminobutyric acid acetyltransferase	494	152.799	362	109.166	0.485117	1.009e-06	1.54502e-06
BLT_RS0120580	186	30S ribosomal protein S14	1955	1697.07	634	536.568	1.66121	1.44439e-162	8.80399e-162	up
BLT_RS0113725	585	hypothetical protein	1294	357.144	882	237.335	0.589583	3.51125e-21	7.78376e-21
BLT_RS0107695	1371	hypothetical protein	375	44.163	197	22.6192	0.965291	6.1686e-15	1.20654e-14
BLT_RS0103615	1017	C4-dicarboxylate ABC transporter substrate-binding protein	4787	759.989	2751	425.812	0.835761	1.56921e-134	8.51888e-134
BLT_RS0113950	285	sporulation protein YqfC	19	10.764	2	1.10467	3.28452	6.41199e-05	9.17596e-05
BLT_RS22295	405	hypothetical protein	44	17.5413	7	2.72077	2.68867	3.37409e-08	5.45903e-08
BLT_RS0111795	978	bifunctional biotin--[acetyl-CoA-carboxylase] synthetase/biotin operon repressor	380	62.735	214	34.4448	0.864984	8.08492e-13	1.49093e-12
BLT_RS22505	1617	hypothetical protein	952	95.0587	617	60.0653	0.662287	2.53296e-19	5.41157e-19
BLT_RS21190	1029	transposase	40	6.27639	8	1.22384	2.35852	1.0114e-06	1.54776e-06
BLT_RS0104125	1116	aminopeptidase	100	14.4677	301	42.4572	-1.55317	1.15366e-23	2.67698e-23	down
BLT_RS0106550	1056	hypothetical protein	110	16.8188	202	30.1118	-0.840256	4.94559e-07	7.66627e-07
BLT_RS0113710	336	hypothetical protein	650	312.348	506	237.061	0.397898	3.00122e-06	4.52401e-06
BLT_RS0107150	1302	isocitrate lyase	137634	17067.9	5429	656.383	4.7006	0	0	up
BLT_RS22820	258	hypothetical protein	165	103.259	53	32.3374	1.675	2.03235e-15	4.0189e-15	up
BLT_RS0101510	1371	magnesium transporter	166	19.5495	116	13.3189	0.553654	0.00138971	0.00184756
BLT_RS0112565	1491	stage V sporulation protein AF	483	52.304	2679	282.842	-2.435	0	0	down
BLT_RS0116215	474	RNA methyltransferase	112	38.1509	76	25.2397	0.596023	0.00501463	0.00641254
BLT_RS0100820	462	hypothetical protein	133	46.4809	51	17.3771	1.41945	2.71848e-10	4.67922e-10	up
BLT_RS0109525	525	aromatic-ring-hydroxylating dioxygenase subunit beta	291	89.495	37	11.0941	3.01202	4.09e-51	1.30665e-50	up
BLT_RS0106435	636	hypothetical protein	763	193.701	862	213.353	-0.139409	0.0516479	0.0607442
BLT_RS0110795	618	hypothetical protein	54	14.1082	80	20.3775	-0.530445	0.0350432	0.041934
BLT_RS0120205	840	LacI family transcriptional regulator	995	191.253	1934	362.431	-0.922224	1.2921e-63	4.61655e-63
BLT_RS0103950	1614	hypothetical protein	306	30.6114	216	21.0668	0.539096	2.26643e-05	3.30291e-05
BLT_RS0109630	282	hypothetical protein	142	81.3026	4479	2500.23	-4.94262	0	0	down
BLT_RS0114180	582	hypothetical protein	512	142.04	434	117.386	0.275044	0.00342144	0.00442699
BLT_RS0100895	1828	hypothetical protein	11280	996.318	1760	151.56	2.71672	0	0	up
BLT_RS0116365	2049	hypothetical protein	513	40.4241	122	9.37274	2.10867	4.49343e-60	1.56255e-59	up
BLT_RS0117840	1098	hypothetical protein	204	29.998	1067	152.972	-2.35032	1.10843e-136	6.0875e-136	down
BLT_RS0110315	861	NmrA family transcriptional regulator	3911	733.415	1108	202.575	1.85618	0	0	up
BLT_RS22090	339	Cro/Cl family transcriptional regulator	243	115.737	124	57.5799	1.00721	7.79694e-11	1.36446e-10	up
BLT_RS0112610	1302	pyrimidine-nucleoside phosphorylase	1062	131.698	1663	201.062	-0.610409	1.05441e-27	2.5985e-27
BLT_RS0101515	720	ATP-binding protein	146	32.7405	106	23.1751	0.4985	0.00642462	0.0081589
BLT_RS0114535	273	hypothetical protein	232	137.211	3	1.72985	6.30961	8.06518e-57	2.7267e-56	up
BLT_RS0103080	273	hypothetical protein	3656	2162.26	778	448.607	2.26902	0	0	up
BLT_RS0108695	438	hypothetical protein	737	271.68	442	158.854	0.774214	1.23105e-19	2.65111e-19
BLT_RS0117160	1206	hypothetical protein	437	58.5058	121	15.7938	1.88922	8.5986e-45	2.60373e-44	up
BLT_RS0105150	561	hypothetical protein	349	100.445	941	264.043	-1.39437	3.58565e-60	1.24803e-59	down
BLT_RS0119560	1158	hypothetical protein	1595	222.391	762	103.585	1.10229	5.66885e-72	2.12188e-71	up
BLT_RS0118015	1026	hypothetical protein	163	25.6511	18	2.76168	3.2154	4.15737e-31	1.07732e-30	up
BLT_RS0102680	2517	preprotein translocase subunit SecA	4980	319.456	13979	874.262	-1.45245	0	0	down
BLT_RS0102885	759	imidazole glycerol phosphate synthase subunit HisH	231	49.14	336	69.6861	-0.503973	3.73674e-05	5.39767e-05
BLT_RS0114300	456	hypothetical protein	1663	588.833	558	192.627	1.61205	7.86897e-133	4.24744e-132	up
BLT_RS0100005	1086	hypothetical protein	527	78.3512	725	105.089	-0.423582	2.44225e-07	3.82507e-07
BLT_RS22635	1806	hypothetical protein	493	44.0752	571	49.7699	-0.175308	0.0477791	0.0564758
BLT_RS0120975	960	hypothetical protein	706	118.74	611	100.189	0.245091	0.00207793	0.00273268
BLT_RS0113475	591	hypothetical protein	81	22.129	22	5.85981	1.91701	1.02838e-09	1.73682e-09	up
BLT_RS0114255	459	hypothetical protein	103	36.2318	468	160.503	-2.14727	7.84008e-55	2.60393e-54	down
BLT_RS0102625	402	flagellar export chaperone FliS	281	112.861	239	93.5881	0.270155	0.0330315	0.0396526
BLT_RS0104245	213	acid-soluble spore protein	5327	4038.02	4359	3221.48	0.325922	1.34643e-28	3.37099e-28
BLT_RS0115040	474	hypothetical protein	141	48.0293	117	38.8558	0.305782	0.0893911	0.102764
BLT_RS0106800	1095	leucine dehydrogenase	197	29.0481	188	27.0267	0.104059	0.479214	0.507886
BLT_RS0120480	438	50S ribosomal protein L13	982	361.995	1190	427.683	-0.240571	0.000105645	0.000149681
BLT_RS0108215	1014	flagellar motor switch protein FliG	369	58.7562	213	33.0667	0.829363	9.9894e-12	1.79306e-11
BLT_RS0112210	948	hypothetical protein	723	123.139	2067	343.227	-1.47888	9.77062e-142	5.49397e-141	down
BLT_RS0118815	417	hypothetical protein	133	51.4968	174	65.6843	-0.351066	0.0338065	0.0405699
BLT_RS0119010	417	hypothetical protein	227	87.8931	283	106.831	-0.281514	0.0280349	0.0338916
BLT_RS0107690	1458	hypothetical protein	346	38.3163	292	31.5264	0.281399	0.0139285	0.0172077
BLT_RS0109350	537	gentisate 1,2-dioxygenase	119	35.7798	98	28.7277	0.316703	0.10671	0.121894
BLT_RS22440	553	isochorismatase	321	93.7227	166	47.2532	0.987986	1.8716e-13	3.52372e-13
BLT_RS0112570	582	stage V sporulation protein AE	52	14.426	49	13.2532	0.122325	0.670117	0.69403
BLT_RS21315	1543	sodium:proton antiporter	430	44.9953	941	96.0003	-1.09326	1.26327e-41	3.7383e-41	down
BLT_RS0108430	1134	transcription termination factor NusA	530	75.4619	83	11.5216	2.7114	1.48943e-82	6.10828e-82	up
BLT_RS0102980	231	preprotein translocase subunit SecG	1281	895.369	1094	745.511	0.264253	8.31612e-06	1.23288e-05
BLT_RS0108265	405	flagellar basal body-associated protein FliL	249	99.268	116	45.087	1.13862	3.44593e-13	6.43958e-13	up
BLT_RS22305	1722	hypothetical protein	584	54.7576	779	71.212	-0.379059	1.39623e-06	2.12675e-06
BLT_RS0105020	1206	hypothetical protein	101	13.5219	216	28.1939	-1.06008	2.70357e-10	4.65567e-10	down
BLT_RS0107290	978	2-oxoisovalerate dehydrogenase subunit beta	316	52.1691	218	35.0886	0.572192	5.52616e-06	8.23792e-06
BLT_RS0115600	219	hypothetical protein	369	272.049	224	161.01	0.756718	3.19257e-10	5.47775e-10
BLT_RS0103010	1605	hypothetical protein	3646	366.781	103	10.1021	5.18219	0	0	up
BLT_RS21840	296	30S ribosomal protein S1	1075	586.384	240	127.635	2.19983	1.8755e-130	9.99473e-130	up
BLT_RS0119600	474	hypothetical protein	446	151.922	436	144.796	0.0693111	0.47558	0.504459
BLT_RS0115645	1362	hypothetical protein	834	98.8676	496	57.3262	0.786303	1.44633e-22	3.28339e-22
BLT_RS0108395	774	UDP pyrophosphate synthase	1554	324.172	1904	387.235	-0.256451	1.84799e-07	2.91247e-07
BLT_RS0102280	2364	preprotein translocase subunit SecA	1972	134.687	6669	444.081	-1.72122	0	0	down
BLT_RS0117885	1137	hypothetical protein	348	49.4178	135	18.6905	1.40272	4.39269e-24	1.0275e-23	up
BLT_RS0108130	270	hypothetical protein	169	101.062	497	289.762	-1.51963	7.58641e-37	2.10622e-36	down
BLT_RS0101205	426	NADH dehydrogenase subunit I	150	56.8521	181	66.8833	-0.234432	0.140212	0.158389
BLT_RS0108995	162	acid-soluble spore protein O	17	16.9433	24	23.3209	-0.460904	0.309952	0.337893
BLT_RS0102030	1125	hypothetical protein	363	52.0978	172	24.0671	1.11416	5.99735e-18	1.25017e-17	up
BLT_RS0119320	1686	iron transporter	5248	502.575	6472	604.268	-0.265848	2.46514e-23	5.68171e-23
BLT_RS0106305	648	hypothetical protein	204	50.83	293	71.1773	-0.485736	0.000197083	0.000275507
BLT_RS0109635	471	hypothetical protein	351	120.324	263	87.8989	0.453004	0.000108656	0.000153774
BLT_RS0116915	876	hypothetical protein	190	35.0199	81	14.5556	1.2666	4.68412e-12	8.45607e-12	up
BLT_RS0105175	279	hypothetical protein	42	24.3058	28	15.798	0.621558	0.0744118	0.0862007
BLT_RS0115000	1152	hypothetical protein	503	70.4986	929	126.944	-0.848525	1.52377e-27	3.73809e-27
BLT_RS22100	552	hypothetical protein	60	17.55	112	31.9395	-0.863869	0.000126218	0.000178226
BLT_RS0110220	1023	hypothetical protein	88	13.889	105	16.1571	-0.218218	0.294328	0.321884
BLT_RS0102815	699	hypothetical protein	330	76.2258	122	27.4746	1.47218	1.58874e-24	3.75584e-24	up
BLT_RS22050	303	hypothetical protein	164	87.3909	10	5.19525	4.07222	5.76515e-37	1.60412e-36	up
BLT_RS0105410	795	septum site-determining protein MinD	1091	221.576	1237	244.935	-0.144599	0.0156957	0.0193593
BLT_RS0110955	723	hypothetical protein	1053	235.155	929	202.268	0.21735	0.000806115	0.00108974
BLT_RS0117520	792	crotonase	4111	838.084	877	174.31	2.26544	0	0	up
BLT_RS22630	1545	hypothetical protein	488	50.9984	371	37.8002	0.432058	1.25101e-05	1.84018e-05
BLT_RS0112620	816	purine nucleoside phosphorylase	365	72.2217	204	39.354	0.875923	1.3195e-12	2.42025e-12
BLT_RS0118140	1026	hypothetical protein	868	136.596	66	10.1262	3.75375	3.13937e-178	2.0387e-177	up
BLT_RS0106660	423	hypothetical protein	34	12.9779	26	9.67568	0.423619	0.257557	0.283478
BLT_RS0109535	783	hypothetical protein	230	47.4276	93	18.6969	1.34293	1.71404e-15	3.39658e-15	up
BLT_RS0101470	972	hypothetical protein	312	51.8267	1797	291.025	-2.48938	1.89668e-244	1.53566e-243	down
BLT_RS0118345	684	phosphoribosylformylglycinamidine synthase	218	51.4595	261	60.0666	-0.223126	0.0911962	0.10468
BLT_RS0116980	1080	hypothetical protein	830	124.085	4265	621.647	-2.32477	0	0	down
BLT_RS0104465	1269	isocitrate dehydrogenase	5822	740.757	2604	323.019	1.19738	8.51113e-294	7.96837e-293	up
BLT_RS0104225	825	hypothetical protein	3686	721.384	16642	3175.41	-2.13811	0	0	down
BLT_RS0120685	3624	DNA-directed RNA polymerase subunit beta'	15686	698.858	5743	249.459	1.4862	0	0	up
BLT_RS0120780	1074	dna integrity scanning protein disa	4234	636.519	662	97.0292	2.71371	0	0	up
BLT_RS0113945	1188	hypothetical protein	163	22.1532	109	14.443	0.617139	0.000478768	0.000655202
BLT_RS0117070	150	hypothetical protein	4206	4527.34	1364	1431.44	1.6612	0	0	up
BLT_RS0106310	2361	hypothetical protein	432	29.5429	366	24.4025	0.275783	0.00702682	0.00889671
BLT_RS0101605	903	hypothetical protein	3483	622.774	2188	381.424	0.707313	3.617e-74	1.38127e-73
BLT_RS0117950	1014	hypothetical protein	1169	186.141	2575	399.75	-1.1027	2.88377e-112	1.39314e-111	down
BLT_RS0120260	879	dimethyladenosine transferase	738	135.56	610	109.242	0.311407	7.68859e-05	0.000109634
BLT_RS0111125	363	hypothetical protein	3883	1727.13	3858	1673.03	0.0459141	0.161357	0.180921
BLT_RS0100710	291	hypothetical protein	56	31.0713	37	20.0151	0.634497	0.0358833	0.0429258
BLT_RS0108880	423	hypothetical protein	106	40.4604	569	211.749	-2.38777	3.8648e-75	1.49099e-74	down
BLT_RS0111095	1527	betaine-aldehyde dehydrogenase	20511	2168.77	26914	2774.52	-0.355363	1.26974e-157	7.6164e-157
BLT_RS0103765	1500	hypothetical protein	1613	173.623	1530	160.564	0.11281	0.0283897	0.0343095
BLT_RS0114740	195	hypothetical protein	275	227.7	608	490.815	-1.10804	4.62995e-28	1.14926e-27	down
BLT_RS21655	696	N-acetylmuramoyl-L-alanine amidase	11142	2584.75	26641	6025.46	-1.22104	0	0	down
BLT_RS22190	269	glyoxalase	206	123.646	220	128.742	-0.0582636	0.676911	0.700489
BLT_RS0106955	291	hypothetical protein	25	13.8711	11	5.95043	1.22102	0.014803	0.0182761
BLT_RS0107875	690	hypothetical protein	158	36.972	398	90.7993	-1.29625	8.17985e-24	1.90392e-23	down
BLT_RS0109595	1020	hypothetical protein	71	11.2389	44	6.79049	0.726911	0.00772814	0.00975193
BLT_RS0114280	438	hypothetical protein	12986	4787.03	24127	8671.17	-0.857096	0	0
BLT_RS0116165	1512	sodium:proline symporter	672	71.76	300	31.2333	1.20009	1.16324e-35	3.17806e-35	up
BLT_RS0117780	1476	hypothetical protein	1285	140.566	279	29.7555	2.24003	5.25527e-159	3.16238e-158	up
BLT_RS0104385	216	hypothetical protein	346	258.635	320	233.209	0.149296	0.181915	0.202766
BLT_RS0115190	264	preprotein translocase subunit YajC	187	114.368	163	97.1924	0.234762	0.128401	0.145439
BLT_RS0112320	954	cobalamin biosynthesis protein CobD	276	46.7117	544	89.7634	-0.942343	9.69e-20	2.09275e-19
BLT_RS0101455	312	hypothetical protein	103	53.3025	155	78.2034	-0.553028	0.00231141	0.00303021
BLT_RS0104985	2358	hypothetical protein	466	31.9086	499	33.3124	-0.0621143	0.503759	0.531808
BLT_RS0110330	1041	hypothetical protein	24061	3731.88	42796	6471.44	-0.794184	0	0
BLT_RS0116655	750	hypothetical protein	69	14.8543	78	16.3713	-0.140282	0.555903	0.582618
BLT_RS0105660	216	hypothetical protein	399	298.253	1275	929.191	-1.63944	3.5317e-102	1.62501e-101	down
BLT_RS0116180	1173	stress response protein	133152	18328	219737	29488.6	-0.686108	0	0
BLT_RS0117650	957	sodium transporter	382	64.449	290	47.7018	0.434115	0.000103584	0.000146816
BLT_RS0105565	795	phosphate ABC transporter ATP-binding protein	239	48.5396	407	80.589	-0.731423	2.42822e-10	4.18532e-10
BLT_RS0106235	927	hypothetical protein	2237	389.629	1803	306.171	0.347761	2.17195e-14	4.18313e-14
BLT_RS0111720	543	hypothetical protein	153	45.4943	249	72.1852	-0.666019	5.09523e-06	7.61057e-06
BLT_RS0110195	2073	hypothetical protein	1238	96.4243	579	43.9671	1.13297	9.7457e-59	3.35192e-58	up
BLT_RS0104710	771	electron transfer flavoprotein subunit beta	14088	2950.26	1639	334.636	3.14017	0	0	up
BLT_RS0111675	837	hypothetical protein	636	122.686	1929	362.79	-1.56416	1.24859e-143	7.06288e-143	down
BLT_RS0113820	945	4-hydroxy-3-methylbut-2-enyl diphosphate reductase	27514	4700.96	37184	6194.03	-0.397921	6.14397e-268	5.24461e-267
BLT_RS0109395	243	hypothetical protein	53	35.2156	7	4.53462	2.95716	2.00031e-10	3.45724e-10	up
BLT_RS0100785	795	hypothetical protein	355	72.0985	177	35.0473	1.04067	6.69082e-16	1.33498e-15	up
BLT_RS0108045	723	ribonuclease III	472	105.407	326	70.9787	0.57051	3.0501e-08	4.94331e-08
BLT_RS0113930	471	16S rRNA maturation RNase YbeY	377	129.237	209	69.8512	0.887657	3.10834e-13	5.82602e-13
BLT_RS0103355	354	hypothetical protein	11448	5221.45	32206	14321.3	-1.45564	0	0	down
BLT_RS0113770	2118	polyphosphate kinase	1255	95.6716	2691	200.003	-1.06386	1.03025e-110	4.95177e-110	down
BLT_RS0106830	480	hypothetical protein	67	22.5371	172	56.4074	-1.32358	1.79549e-11	3.21213e-11	down
BLT_RS0114060	1113	molecular chaperone DnaJ	2207	320.164	2810	397.429	-0.311888	2.34262e-14	4.50724e-14
BLT_RS0103790	1092	hypothetical protein	103	15.2293	40	5.76615	1.40117	3.74858e-08	6.05842e-08
BLT_RS0115435	180	hypothetical protein	471	422.487	756	661.147	-0.646064	1.02693e-14	1.9931e-14
BLT_RS0101780	480	hypothetical protein	1521	511.626	4	1.3118	8.6074	7.1352e-304	6.9206e-303	up
BLT_RS0103875	807	hypothetical protein	3884	777.089	4784	933.182	-0.264079	1.87709e-17	3.86585e-17
BLT_RS0101575	726	hypothetical protein	308	68.4982	430	93.2353	-0.444811	3.19219e-05	4.62525e-05
BLT_RS0110645	1095	hypothetical protein	2808	414.045	626	89.993	2.2019	0	0	up
BLT_RS0114755	306	hypothetical protein	313	165.154	99	50.9287	1.69726	2.51519e-28	6.2639e-28	up
BLT_RS0119930	990	thiamine-phosphate kinase	584	95.2451	196	31.1652	1.61171	7.71495e-48	2.41164e-47	up
BLT_RS0120010	849	dihydropteroate synthase	1064	202.348	52	9.64149	4.39144	5.36532e-239	4.3071e-238	up
BLT_RS0103885	993	hypothetical protein	8612	1400.3	2147	340.354	2.04062	0	0	up
BLT_RS0109600	1494	hypothetical protein	203	21.9387	167	17.596	0.318227	0.0342997	0.0411095
BLT_RS0120200	378	reactive intermediate/imine deaminase	276	117.891	621	258.612	-1.13333	1.26627e-29	3.23032e-29	down
BLT_RS0108150	909	succinyl-CoA synthetase subunit alpha	1011	179.578	1791	310.156	-0.788387	1.27689e-45	3.89467e-45
BLT_RS0117050	1080	A/G-specific adenine glycosylase	401	59.9495	306	44.6012	0.426666	9.06988e-05	0.000128698
BLT_RS0120345	216	hypothetical protein	32	23.92	73	53.2008	-1.15323	8.50392e-05	0.000121077	down
BLT_RS0119235	189	hypothetical protein	11	9.39715	15	12.4933	-0.410863	0.470438	0.499286
BLT_RS0118275	957	hypothetical protein	372	62.7619	105	17.2713	1.86151	1.15415e-37	3.24971e-37	up
BLT_RS0119605	714	hypothetical protein	57	12.8897	50	11.0235	0.225629	0.419064	0.449056
BLT_RS0119220	1149	hypothetical protein	469	65.9049	201	27.5375	1.25899	2.98239e-27	7.28792e-27	up
BLT_RS0102945	246	hypothetical protein	796	522.448	810	518.321	0.0114421	0.873723	0.885338
BLT_RS0111620	420	hypothetical protein	56	21.528	21	7.8708	1.45163	3.09099e-05	4.48033e-05	up
BLT_RS0102620	2001	hypothetical protein	1137	91.7442	800	62.9349	0.543756	1.84926e-16	3.73315e-16
BLT_RS0110090	699	two-component system response regulator	320	73.9159	85	19.1421	1.94913	1.32509e-34	3.59681e-34	up
BLT_RS0115255	537	hypothetical protein	77	23.1516	324	94.9772	-2.03647	4.23532e-36	1.16302e-35	down
BLT_RS0118725	735	aliphatic sulfonate ABC transporter ATP-binding protein	65	14.2788	48	10.2802	0.474001	0.0824946	0.0951551
BLT_RS0102160	615	sugar transferase	148	38.8554	207	52.9839	-0.447438	0.00371362	0.00479353
BLT_RS0100290	519	hypothetical protein	166	51.6423	163	49.4389	0.0629068	0.692502	0.715446
BLT_RS0106745	849	rRNA methyltransferase	2330	443.112	1288	238.812	0.891793	5.57746e-74	2.12349e-73
BLT_RS0103090	1179	acetyl-CoA acetyltransferase	9247	1266.35	1563	208.686	2.60126	0	0	up
BLT_RS0113825	1716	hypothetical protein	3088	290.553	283	25.9608	3.48439	0	0	up
BLT_RS0117900	351	hypothetical protein	118	54.28	84	37.6722	0.526921	0.00996569	0.0124588
BLT_RS0102480	498	hypothetical protein	730	236.678	274	86.6104	1.45032	4.39662e-51	1.40342e-50	up
BLT_RS0106685	402	hypothetical protein	157	63.0578	154	60.3036	0.0644297	0.693729	0.716322
BLT_RS0116275	960	catechol 2,3-dioxygenase	812	136.568	149	24.4323	2.48276	4.84014e-114	2.35637e-113	up
BLT_RS22715	1155	hypothetical protein	328	45.8519	237	32.3009	0.505404	3.52658e-05	5.09995e-05
BLT_RS0120855	2049	hypothetical protein	381	30.0226	1060	81.4353	-1.43961	8.602e-71	3.19757e-70	down
BLT_RS0112060	573	30S ribosomal protein S1	1922	541.581	746	204.943	1.40196	5.27445e-125	2.72609e-124	up
BLT_RS0120800	534	hypothetical protein	5360	1620.65	1818	535.922	1.59648	0	0	up
BLT_RS0105305	214	hypothetical protein	6	4.52692	4	2.94235	0.621558	0.500111	0.528253
BLT_RS0111325	1278	hypothetical protein	305	38.5331	235	28.9458	0.412744	0.000932149	0.00125517
BLT_RS21830	261	hypothetical protein	533	329.725	738	445.107	-0.43289	1.07235e-07	1.70789e-07
BLT_RS0116245	1125	hypothetical protein	10976	1575.28	5554	777.145	1.01935	0	0	up
BLT_RS0108985	138	spore protein	91	106.47	73	83.2707	0.354566	0.116652	0.132568
BLT_RS0121010	941	4,5-dihydroxyphthalate decarboxylase	61	10.4666	51	8.53158	0.294908	0.280345	0.307215
BLT_RS0115870	1182	hypothetical protein	315	43.0287	91	12.1192	1.82801	2.07184e-31	5.39479e-31	up
BLT_RS0120575	399	30S ribosomal protein S8	2622	1061.02	959	378.351	1.48766	2.04665e-185	1.35474e-184	up
BLT_RS0108075	1356	signal recognition particle protein	9973	1187.49	11126	1291.6	-0.12124	1.03305e-09	1.74393e-09
BLT_RS0118645	720	ATP-binding protein	41	9.19425	51	11.1503	-0.278278	0.356345	0.38502
BLT_RS0115675	1203	aminotransferase	14097	1892.02	4854	635.16	1.57474	0	0	up
BLT_RS0105745	2115	hypothetical protein	1346	102.754	2340	174.162	-0.761235	1.09035e-55	3.64382e-55
BLT_RS0109895	501	hypothetical protein	219	70.5783	288	90.4906	-0.358542	0.0053516	0.00683533
BLT_RS0111425	552	hypothetical protein	2012	588.51	694	197.911	1.57222	1.17198e-154	6.94171e-154	up
BLT_RS0100265	480	50S rRNA methyltransferase	50	16.8188	104	34.1068	-1.01999	2.18131e-05	3.18255e-05	down
BLT_RS0104135	435	hypothetical protein	751	278.751	1676	606.504	-1.12154	1.00451e-75	3.87924e-75	down
BLT_RS0101265	1326	UDP-N-acetylglucosamine 1-carboxyvinyltransferase	7958	969.004	44412	5272.37	-2.44388	0	0	down
BLT_RS0112715	180	hypothetical protein	118	105.846	94	82.2061	0.36465	0.066616	0.0777427
BLT_RS0107195	1281	C4-dicarboxylate ABC transporter permease	402	50.669	3536	434.522	-3.10026	0	0	down
BLT_RS0105275	579	hypothetical protein	36	10.039	15	4.07813	1.29963	0.0021351	0.00280687
BLT_RS0119620	798	nitrate ABC transporter permease	83	16.7935	19	3.748	2.16371	2.33748e-11	4.15613e-11
BLT_RS0109400	963	hypothetical protein	371	62.2032	345	56.3951	0.141418	0.189815	0.21126
BLT_RS0118660	225	hypothetical protein	16	11.4816	28	19.5895	-0.770759	0.0821987	0.0948717
BLT_RS0118555	633	hypothetical protein	627	159.93	4231	1052.18	-2.71787	0	0	down
BLT_RS0120530	219	translation initiation factor IF-1	1687	1243.76	815	585.817	1.08618	2.86373e-74	1.09694e-73	up
BLT_RS0107225	1125	hypothetical protein	121	17.3659	356	49.8134	-1.52027	6.9459e-27	1.6875e-26	down
BLT_RS0109890	1023	hypothetical protein	837	132.104	280	43.0855	1.6164	4.66337e-68	1.7099e-67	up
BLT_RS0120520	366	30S ribosomal protein S13	2836	1251.09	1577	678.265	0.88327	3.16068e-88	1.34901e-87
BLT_RS21380	340	hypothetical protein	158	75.0314	314	145.378	-0.954244	2.93948e-12	5.33719e-12
BLT_RS0117330	639	multidrug ABC transporter ATP-binding protein	233	58.8735	242	59.6161	-0.0180816	0.891368	0.900678
BLT_RS0116665	879	hypothetical protein	65	11.9396	69	12.3569	-0.0495611	0.842421	0.856264
BLT_RS0105250	321	hypothetical protein	26	13.0778	13	6.3751	1.0366	0.0293653	0.0354318
BLT_RS0106620	384	stage III sporulation protein AD	184	77.3663	117	47.9627	0.689793	4.21333e-05	6.07215e-05
BLT_RS0106990	1242	hypothetical protein	162	21.06	46	5.83022	1.85288	3.22399e-17	6.60016e-17	up
BLT_RS0113955	579	hypothetical protein	4470	1246.5	16209	4406.83	-1.82185	0	0	down
BLT_RS0117615	195	hypothetical protein	25	20.7	14	11.3017	0.873097	0.0641686	0.0749677
BLT_RS0117365	807	pyrroline-5-carboxylate reductase	170	34.0126	136	26.5286	0.358524	0.030239	0.0364394
BLT_RS0103910	513	transferase	507	159.572	378	115.991	0.460195	2.36249e-06	3.57261e-06
BLT_RS0116150	459	hypothetical protein	101	35.5282	61	20.9202	0.76407	0.000906644	0.00122258
BLT_RS22470	1395	hypothetical protein	87	10.0696	22	2.48255	2.02011	5.78395e-11	1.01502e-10
BLT_RS0117225	885	hypothetical protein	203	37.0355	79	14.0518	1.39815	1.2386e-14	2.40023e-14	up
BLT_RS0111575	792	hypothetical protein	588	119.872	1467	291.577	-1.28239	8.43994e-82	3.43886e-81	down
BLT_RS0115130	441	D-tyrosyl-tRNA(Tyr) deacylase	734	268.734	267	95.3062	1.49554	1.13207e-53	3.71742e-53	up
BLT_RS0111340	2151	hypothetical protein	356	26.7223	420	30.7367	-0.201917	0.0516304	0.0607426
BLT_RS0115175	663	membrane protein	184	44.8094	792	188.044	-2.0692	2.14086e-87	9.09626e-87	down
BLT_RS0117220	1056	ABC transporter substrate-binding protein	212	32.4143	74	11.031	1.55506	1.45777e-17	3.01462e-17	up
BLT_RS0104765	225	LuxR family transcriptional regulator	13947	10008.4	4652	3254.66	1.62063	0	0	up
BLT_RS0118840	371	ChrA protein	116	50.4835	114	48.3704	0.0616865	0.745758	0.765021
BLT_RS0110160	816	hypothetical protein	534	105.661	150	28.9368	1.86847	1.45706e-53	4.77211e-53	up
BLT_RS0111950	780	hypothetical protein	193	39.951	216	43.5921	-0.125835	0.378139	0.40775
BLT_RS0108475	2109	polyribonucleotide nucleotidyltransferase	1504	115.143	1493	111.438	0.0471859	0.370571	0.399932
BLT_RS0116495	1821	hypothetical protein	244	21.6344	117	10.114	1.09697	2.7664e-12	5.03019e-12	up
BLT_RS0103295	194	transposase	96	79.8978	50	40.5711	0.977702	6.6396e-05	9.49269e-05
BLT_RS0102705	894	cell division protein FtsX	96	17.338	41	7.2193	1.26401	9.23365e-07	1.4162e-06
BLT_RS0118010	723	hypothetical protein	135	30.1481	31	6.74951	2.15921	1.70431e-17	3.51194e-17	up
BLT_RS0103600	1275	hypothetical protein	4067	515.026	2543	313.968	0.714029	1.0532e-87	4.49007e-87
BLT_RS0102235	426	hypothetical protein	53	20.0878	147	54.3196	-1.43516	3.87213e-11	6.83648e-11	down
BLT_RS0104575	360	50S ribosomal protein L20	4665	2092.25	3894	1702.72	0.29722	1.83395e-21	4.08229e-21
BLT_RS0109175	732	hypothetical protein	505	111.39	434	93.3313	0.255184	0.00680162	0.00862026
BLT_RS0110395	570	cobalamin biosynthesis protein CbiY	354	100.275	234	64.6234	0.633836	1.35891e-07	2.15336e-07
BLT_RS0113045	579	transglutaminase	192	53.5412	1206	327.882	-2.61446	7.0354e-174	4.49908e-173	down
BLT_RS0113840	1122	Nif3-like dinuclear metal center hexameric protein	726	104.474	706	99.0514	0.0768969	0.313191	0.341227
BLT_RS22255	1375	recombinase	212	24.8942	171	19.5768	0.346663	0.0190456	0.0233309
BLT_RS0111905	798	tryptophan synthase subunit alpha	5860	1185.66	6451	1272.54	-0.102027	8.73967e-05	0.000124152
BLT_RS0110930	345	hypothetical protein	242	113.256	161	73.4608	0.624542	1.70126e-05	2.49276e-05
BLT_RS0107865	714	hypothetical protein	81	18.3169	1118	246.486	-3.75026	3.87975e-223	2.98741e-222	down
BLT_RS21195	582	hypothetical protein	253	70.188	67	18.1218	1.9535	8.6979e-28	2.14491e-27	up
BLT_RS0105265	402	hypothetical protein	37	14.8607	5	1.95791	2.92412	1.25107e-07	1.98624e-07
BLT_RS0119105	777	hypothetical protein	296	61.5086	378	76.5807	-0.316194	0.00458863	0.00588274
BLT_RS0113425	216	hypothetical protein	57	42.6075	7	5.10144	3.06213	1.97258e-11	3.52226e-11	up
BLT_RS0115410	744	multidrug ABC transporter ATP-binding protein	134	29.0802	103	21.7928	0.416184	0.0270308	0.0327091
BLT_RS0103085	2382	3-hydroxyacyl-CoA dehydrogenase	12620	855.426	2738	180.942	2.24111	0	0	up
BLT_RS0101735	237	hypothetical protein	13	8.85646	1	0.664202	3.73704	0.000504996	0.000690094
BLT_RS0120490	798	cobalt ABC transporter permease	251	50.785	163	32.1539	0.659411	4.29012e-06	6.43603e-06
BLT_RS0107015	255	AAA family ATPase	101	63.9508	103	63.5837	0.0083065	0.967201	0.969514
BLT_RS0113230	1269	hypothetical protein	198	25.1923	191	23.693	0.0885233	0.545122	0.57275
BLT_RS22680	2115	hypothetical protein	672	51.3008	462	34.3859	0.577164	2.42154e-11	4.30154e-11
BLT_RS0107200	261	hypothetical protein	98	60.6248	1147	691.786	-3.51234	4.14336e-218	3.09563e-217	down
BLT_RS0112300	792	hypothetical protein	98	19.9786	107	21.2671	-0.0901616	0.654728	0.679397
BLT_RS0106710	408	hypothetical protein	79	31.2631	42	16.2046	0.948059	0.000420569	0.000577651
BLT_RS0112160	1119	cystathionine gamma-synthase	1343	193.781	518	72.8699	1.41103	9.02195e-89	3.88139e-88	up
BLT_RS0115925	650	AMP-dependent synthetase	71	17.6364	41	9.92931	0.828791	0.00284594	0.00370394
BLT_RS0117295	1542	fumarate hydratase	2197	230.044	1537	156.906	0.552013	4.10917e-31	1.06556e-30
BLT_RS0111980	714	ubiquinone/menaquinone biosynthesis methyltransferase	431	97.464	84	18.5195	2.39582	5.15646e-59	1.77512e-58	up
BLT_RS0113925	423	hypothetical protein	341	130.16	149	55.4491	1.23105	1.31198e-19	2.82057e-19	up
BLT_RS0104675	2361	DNA mismatch repair protein MutS	1302	89.039	1148	76.5411	0.218202	0.000184044	0.000257948
BLT_RS0108100	735	tRNA (guanine(37)-N(1))-methyltransferase	644	141.47	240	51.4011	1.46062	9.75549e-46	2.98036e-45	up
BLT_RS0112155	1167	cystathionine beta-lyase	1406	194.527	364	49.0997	1.98618	1.73977e-149	1.00677e-148	up
BLT_RS0100130	726	membrane protein	387	86.0675	443	96.0541	-0.158378	0.114184	0.129999
BLT_RS0111650	216	hypothetical protein	49	36.6275	135	98.385	-1.42551	2.95066e-10	5.07191e-10	down
BLT_RS0101945	765	hypothetical protein	481	101.519	553	113.792	-0.164647	0.0668309	0.0779453
BLT_RS0110140	897	hypothetical protein	1307	235.26	83	14.5658	4.0136	3.47827e-279	3.0449e-278	up
BLT_RS0110870	210	cro regulatory protein	150	115.329	34	25.4864	2.17795	1.858e-19	3.98308e-19	up
BLT_RS0120965	1320	D-alanyl-D-alanine carboxypeptidase	974	119.138	1352	161.232	-0.436506	4.21746e-13	7.85413e-13
BLT_RS0105100	222	hypothetical protein	31	22.5462	24	17.0179	0.405829	0.29886	0.326462
BLT_RS0105880	189	hypothetical protein	92	78.5943	259	215.718	-1.45665	7.26512e-19	1.53393e-18	down
BLT_RS0117060	984	hypothetical protein	723	118.634	427	68.3096	0.796355	3.53904e-20	7.70057e-20
BLT_RS0119175	201	hypothetical protein	634	509.282	304	238.082	1.09701	1.91814e-29	4.87677e-29	up
BLT_RS0110865	420	hypothetical protein	123	47.2847	36	13.4928	1.80919	4.69742e-13	8.73288e-13	up
BLT_RS0102505	455	hypothetical protein	288	102.199	276	95.4875	0.0979961	0.419936	0.449736
BLT_RS21205	203	histidine kinase	32	25.4518	80	62.0358	-1.28533	7.41856e-06	1.10154e-05	down
BLT_RS0108390	558	ribosome recycling factor	256	74.0749	334	94.2239	-0.347109	0.00362148	0.0046778
BLT_RS0106295	180	hypothetical protein	3	2.691	1	0.874533	1.62156	0.295551	0.323034
BLT_RS0112315	1029	hypothetical protein	61	9.57149	189	28.9131	-1.59491	5.4702e-16	1.09433e-15	down
BLT_RS0117170	762	ATPase AAA	257	54.4557	223	46.0679	0.24132	0.0672258	0.0783574
BLT_RS0120525	114	50S ribosomal protein L36	888	1257.69	440	607.57	1.04965	7.21741e-38	2.04747e-37	up
BLT_RS0100125	1158	cysteine desulfurase	352	49.0794	284	38.6063	0.34628	0.00254377	0.00332213
BLT_RS0105550	936	phosphate ABC transporter permease	504	86.94	575	96.7032	-0.153543	0.0807718	0.0933391
BLT_RS0105965	1080	hypothetical protein	714	106.743	440	64.1324	0.735016	1.46774e-17	3.03108e-17
BLT_RS0117845	1434	hypothetical protein	201	22.6314	125	13.7218	0.721863	8.40258e-06	1.24521e-05
BLT_RS0106190	666	membrane protein	832	201.704	671	158.598	0.346866	3.35843e-06	5.05641e-06
BLT_RS0103455	402	hypothetical protein	264	106.033	153	59.912	0.823602	1.04641e-08	1.72331e-08
BLT_RS0107540	426	hypothetical protein	1428	541.232	1030	380.607	0.507947	4.27543e-18	8.932e-18
BLT_RS0109780	816	hypothetical protein	129	25.5249	24	4.62988	2.46286	2.16231e-19	4.62494e-19	up
BLT_RS0116995	222	spore protein	31119	22632.8	17579	12464.9	0.860538	0	0
BLT_RS0112135	429	hypothetical protein	67	25.2164	43	15.7783	0.67642	0.0151395	0.0186793
BLT_RS0119700	1134	alcohol dehydrogenase	432	61.5086	278	38.5905	0.672542	8.42042e-10	1.42659e-09
BLT_RS0112470	348	hypothetical protein	1702	789.669	1890	854.931	-0.11456	0.01739	0.021386
BLT_RS0110370	702	precorrin-2 C20-methyltransferase	424	97.52	285	63.9082	0.609698	2.51902e-08	4.09666e-08
BLT_RS0109255	234	hypothetical protein	235	162.15	904	608.137	-1.90707	1.3864e-89	6.01253e-89	down
BLT_RS0108325	1050	two-component system protein-glutamate methylesterase response regulator	1989	305.851	2009	301.189	0.0221613	0.627158	0.652944
BLT_RS0108840	219	hypothetical protein	393	289.743	643	462.185	-0.673694	1.32271e-13	2.5003e-13
BLT_RS0105210	525	hypothetical protein	159	48.8993	333	99.8467	-1.0299	1.89477e-14	3.66051e-14	down
BLT_RS0117090	909	hypothetical protein	245	43.5178	717	124.166	-1.5126	4.88846e-52	1.57912e-51	down
BLT_RS0108770	660	hypothetical protein	1424	348.362	218	51.995	2.74414	3.15972e-221	2.40356e-220	up
BLT_RS0114510	339	hypothetical protein	578	275.292	12	5.57225	5.62656	8.94954e-140	4.99506e-139	up
BLT_RS0107655	384	hypothetical protein	28	11.7731	9	3.68944	1.67403	0.00107854	0.00144611
BLT_RS0110630	1902	hypothetical protein	736	62.4788	558	46.182	0.436036	6.27911e-08	1.00685e-07
BLT_RS0116685	192	hypothetical protein	13	10.9322	26	21.3167	-0.963404	0.0428954	0.0509586
BLT_RS0111400	648	2-hydroxychromene-2-carboxylate isomerase	1371	341.608	396	96.1986	1.82825	1.03802e-130	5.53952e-130	up
BLT_RS0105485	1569	hypothetical protein	846	87.0588	499	50.0641	0.798213	1.99568e-23	4.6025e-23
BLT_RS0104390	504	hypothetical protein	168	53.82	195	60.905	-0.178417	0.239379	0.263932
BLT_RS0115670	1527	amidase	1452	153.53	1122	115.665	0.408564	8.35446e-13	1.53988e-12
BLT_RS0120495	870	hypothetical protein	365	67.739	109	19.7222	1.78016	6.7916e-35	1.84882e-34	up
BLT_RS0110965	1659	methane monooxygenase	2528	246.034	3485	330.678	-0.426567	4.49788e-30	1.15367e-29
BLT_RS0102520	819	hypothetical protein	1366	269.297	9626	1850.17	-2.78038	0	0	down
BLT_RS0112240	579	hypothetical protein	270	75.2922	118	32.0813	1.23077	7.64482e-16	1.52291e-15	up
BLT_RS0111085	1221	beta-ketoadipyl CoA thiolase	11103	1468.22	9694	1249.79	0.232381	3.61856e-31	9.40278e-31
BLT_RS0118230	291	glutamyl-tRNA amidotransferase subunit C	41	22.7487	9	4.86853	2.22422	1.7688e-06	2.68829e-06	up
BLT_RS0115495	1392	two-component system sensor histidine kinase	1937	224.675	656	74.1845	1.59865	1.45409e-152	8.50588e-152	up
BLT_RS0100305	420	hypothetical protein	286	109.947	375	140.55	-0.35428	0.00167471	0.0022163
BLT_RS0102060	234	hypothetical protein	16	11.04	4	2.69087	2.0366	0.00475119	0.00608494
BLT_RS0112780	900	hypothetical protein	50	8.97	30	5.2472	0.773561	0.0182924	0.0224446
BLT_RS0105065	1056	hypothetical protein	4763	728.252	2033	303.055	1.26486	3.28228e-262	2.77669e-261	up
BLT_RS0105120	213	hypothetical protein	64	48.5138	108	79.8165	-0.718292	0.0013264	0.00176651
BLT_RS0118310	1269	hypothetical protein	242	30.7906	1278	158.532	-2.36421	1.92999e-164	1.18404e-163	down
BLT_RS0107870	633	hypothetical protein	45	11.4782	86	21.3867	-0.897816	0.000518669	0.000708009
BLT_RS0115570	189	hypothetical protein	39	33.3172	19	15.8249	1.07407	0.00601925	0.00766216
BLT_RS0100640	1446	sucrose-6-phosphate hydrolase	833	93.0126	983	107.012	-0.202279	0.00285712	0.00371721
BLT_RS0104430	1755	pyruvate kinase	504	46.368	591	53.0102	-0.193139	0.0269892	0.0326694
BLT_RS0112915	189	hypothetical protein	14	11.96	5	4.16444	1.52202	0.0309385	0.0372288
BLT_RS0120295	291	transition state regulator Abh	5293	2936.8	3259	1762.95	0.736252	1.01344e-119	5.1119e-119
BLT_RS0104485	1761	alkaline phosphatase	503	46.1183	427	38.1696	0.272918	0.00397822	0.00512631
BLT_RS0116460	939	hypothetical protein	898	154.41	770	129.084	0.258453	0.000258943	0.00036038
BLT_RS0112405	207	hypothetical protein	20	15.6	18	13.6883	0.188599	0.687195	0.710353
BLT_RS0113915	915	GTPase Era	961	169.577	488	83.9552	1.01425	1.0711e-38	3.07321e-38	up
BLT_RS0105155	375	hypothetical protein	53	22.8197	46	19.3097	0.240954	0.406599	0.436195
BLT_RS0106610	513	stage III sporulation protein AB	283	89.0705	147	45.1075	0.981581	6.3631e-12	1.14651e-11
BLT_RS0107650	909	hypothetical protein	187	33.2157	89	15.4126	1.10776	6.9531e-10	1.18225e-09	up
BLT_RS0114600	192	hypothetical protein	49	41.2059	4	3.2795	3.65131	2.13635e-11	3.80568e-11	up
BLT_RS0120540	654	adenylate kinase	4112	1015.17	2105	506.667	1.00262	1.3038e-156	7.79595e-156	up
BLT_RS0120795	1074	ATP--guanido phosphotransferase	11015	1655.94	2486	364.372	2.18417	0	0	up
BLT_RS0103120	669	methionine ABC transporter permease	424	102.33	89	20.9417	2.28878	4.13342e-55	1.37769e-54	up
BLT_RS0111560	639	hypothetical protein	7053	1782.12	15671	3860.51	-1.11519	0	0	down
BLT_RS0119110	831	PtsGHI operon antiterminator	292	56.7345	376	71.2255	-0.328169	0.00341089	0.00441637
BLT_RS0112555	1320	diaminopimelate decarboxylase	2318	283.534	5657	674.623	-1.25056	5.29235e-298	5.04243e-297	down
BLT_RS0119260	663	hypothetical protein	550	133.941	609	144.595	-0.110415	0.192906	0.214321
BLT_RS0105520	330	hypothetical protein	924	452.088	713	340.114	0.410586	9.81414e-09	1.61768e-08
BLT_RS0120645	630	50S ribosomal protein L3	4488	1150.21	1151	287.596	1.99978	0	0	up
BLT_RS21420	1332	bifunctional folylpolyglutamate synthase/dihydrofolate synthase	636	77.0935	1014	119.835	-0.636363	9.6025e-19	2.0263e-18
BLT_RS0106655	357	hypothetical protein	87	39.3474	92	40.5666	-0.0440229	0.838278	0.852513
BLT_RS0116435	981	hypothetical protein	219	36.0446	30	4.81394	2.90449	1.31404e-37	3.69439e-37	up
BLT_RS0104415	849	acetyl-CoA carboxylase subunit beta	1176	223.648	419	77.6882	1.52546	2.38763e-87	1.01333e-86	up
BLT_RS0117035	759	short-chain dehydrogenase	145	30.8455	51	10.5774	1.54408	2.24503e-12	4.09401e-12	up
BLT_RS0114295	648	cob(II)yrinic acid a,c-diamide reductase	1588	395.677	959	232.966	0.764204	1.49613e-39	4.3256e-39
BLT_RS0101430	369	cation:proton antiporter	1164	509.321	249	106.224	2.26147	6.93844e-146	3.93665e-145	up
BLT_RS0106670	357	hypothetical protein	82	37.0861	58	25.5746	0.536167	0.0290777	0.0351073
BLT_RS0115265	444	hypothetical protein	409	148.732	499	176.916	-0.250343	0.0091028	0.011414
BLT_RS0120235	921	hypothetical protein	114	19.9853	65	11.1097	0.847118	0.000116975	0.000165422
BLT_RS0102890	624	phosphoribosyl-ATP pyrophosphatase	231	59.7713	763	192.481	-1.68719	2.09505e-64	7.50675e-64	down
BLT_RS0101075	468	hypothetical protein	150	51.75	174	58.5264	-0.177529	0.268717	0.295073
BLT_RS0118765	210	tautomerase	176	135.319	235	176.156	-0.38049	0.00782239	0.00986426
BLT_RS0119385	1014	hypothetical protein	654	104.137	1015	157.571	-0.597522	6.25706e-17	1.27541e-16
BLT_RS0107475	900	heme A synthase	438	78.5772	229	40.0536	0.972179	2.24568e-17	4.61489e-17
BLT_RS0108755	405	hypothetical protein	2690	1072.41	1378	535.603	1.00163	5.87327e-103	2.72905e-102	up
BLT_RS0120705	498	50S ribosomal protein L10	1354	438.99	2841	898.029	-1.03258	2.64781e-111	1.27426e-110	down
BLT_RS0117855	1152	hypothetical protein	134	18.7809	28	3.82608	2.29533	1.30581e-18	2.74628e-18
BLT_RS0117380	381	osmotically inducible protein C	2205	934.434	1113	459.853	1.02292	1.16432e-87	4.95262e-87	up
BLT_RS0117880	600	transcriptional regulator	232	62.4312	139	36.468	0.775635	3.49318e-07	5.44844e-07
BLT_RS0120435	984	hypothetical protein	4230	694.081	137	21.9166	4.98501	0	0	up
BLT_RS0106585	1068	peptidase M24	287	43.3886	2125	313.211	-2.85174	0	0	down
BLT_RS22015	183	hypothetical protein	88	77.642	90	77.4177	0.00417406	0.984601	0.985646
BLT_RS0118145	243	hypothetical protein	667	443.185	368	238.391	0.894577	1.66927e-22	3.78494e-22
BLT_RS0102835	1173	glycolate oxidase	305	41.9824	109	14.6277	1.52108	7.69936e-24	1.79319e-23	up
BLT_RS0107050	399	3-demethylubiquinone-9 3-methyltransferase	143	57.8666	131	51.6829	0.163044	0.349813	0.378396
BLT_RS0107130	1035	hypothetical protein	163	25.428	381	57.9473	-1.18832	3.75168e-20	8.15856e-20	down
BLT_RS0102595	240	hypothetical protein	51	34.3103	59	38.6981	-0.173622	0.528505	0.556686
BLT_RS0104655	2427	phenylalanine--tRNA ligase subunit beta	726	48.2983	607	39.3702	0.294869	0.000196084	0.000274314
BLT_RS0104305	318	hypothetical protein	1598	811.362	5336	2641.42	-1.7029	0	0	down
BLT_RS0104945	1290	glutamate-1-semialdehyde aminotransferase	2901	363.097	806	98.3545	1.88429	1.09265e-285	9.88628e-285	up
BLT_RS0120865	1047	alcohol dehydrogenase	94	14.4959	110	16.5384	-0.190175	0.347231	0.375818
BLT_RS0119715	1185	formamidase	1762	240.078	289	38.3909	2.64467	9.00416e-263	7.63432e-262	up
BLT_RS0116195	1860	penicillin-binding protein	1312	113.89	916	77.5231	0.554944	2.1209e-19	4.53894e-19
BLT_RS0119255	1143	hypothetical protein	520	73.4551	408	56.1905	0.386538	4.77606e-05	6.87002e-05
BLT_RS0100840	2052	penicillin-binding protein 2D	577	45.4008	1247	95.6616	-1.07522	3.52664e-53	1.15004e-52	down
BLT_RS0101215	315	NADH:ubiquinone oxidoreductase subunit K	24	12.3017	105	52.472	-2.09269	3.66241e-13	6.83734e-13	down
BLT_RS0120065	258	hypothetical protein	87	54.4458	75	45.7604	0.25072	0.269377	0.295625
BLT_RS0103250	306	hypothetical protein	565	298.121	263	135.295	1.13978	5.38995e-28	1.33616e-27	up
BLT_RS0116350	771	hypothetical protein	754	157.9	76	15.517	3.34709	3.84713e-142	2.16969e-141	up
BLT_RS0108625	1056	recombinase RecA	3493	534.072	6189	922.583	-0.788644	3.20358e-153	1.88273e-152
BLT_RS0113835	261	hypothetical protein	1468	908.135	1032	622.426	0.545005	7.05937e-21	1.55487e-20
BLT_RS22700	240	hypothetical protein	85	57.1838	148	97.0732	-0.763467	7.39626e-05	0.000105545
BLT_RS0103005	423	Fur family transcriptional regulator	2435	929.445	8972	3338.86	-1.84491	0	0	down
BLT_RS0109860	279	hypothetical protein	273	157.988	48	27.0823	2.54439	1.29416e-40	3.79399e-40	up
BLT_RS0109605	507	hypothetical protein	42	13.3754	30	9.31455	0.522022	0.127398	0.144347
BLT_RS0104050	309	hypothetical protein	501	261.785	232	118.189	1.14728	2.94964e-25	7.0126e-25	up
BLT_RS0114985	1082	protease	1123	167.578	569	82.7816	1.01745	3.75632e-45	1.13927e-44	up
BLT_RS0119725	1083	hypothetical protein	207	30.8608	215	31.2506	-0.0181104	0.897411	0.906056
BLT_RS0110050	1833	hypothetical protein	464	40.8715	392	33.6645	0.279867	0.00461149	0.00591004
BLT_RS0111800	1137	hypothetical protein	393	55.8081	93	12.8757	2.11582	1.24028e-46	3.8232e-46	up
BLT_RS22815	258	hypothetical protein	178	111.395	81	49.4213	1.17248	3.02619e-10	5.19938e-10	up
BLT_RS0119405	600	hypothetical protein	1674	450.474	1420	372.551	0.274004	1.334e-07	2.11478e-07
BLT_RS0103320	1068	NADH dehydrogenase	1180	178.392	1871	275.773	-0.628427	1.60175e-32	4.21732e-32
BLT_RS0103380	702	hypothetical protein	194	44.62	324	72.6535	-0.703342	4.7962e-08	7.72346e-08
BLT_RS0104540	1461	hypothetical protein	956	105.651	198	21.3336	2.30811	4.01866e-123	2.06011e-122	up
BLT_RS0102920	948	hypothetical protein	3872	659.465	753	125.036	2.39895	0	0	up
BLT_RS0116305	194	transposase	83	69.0783	49	39.7597	0.796925	0.00181241	0.0023935
BLT_RS0103255	267	hypothetical protein	152	91.9173	308	181.588	-0.982263	1.41987e-12	2.60183e-12
BLT_RS0108050	222	hypothetical protein	707	514.199	637	451.684	0.187012	0.0175626	0.0215913
BLT_RS0108855	1403	hypothetical protein	416	47.8741	206	23.1131	1.05053	1.24858e-18	2.62885e-18	up
BLT_RS0114540	231	hypothetical protein	203	141.889	0.5	0.340727	8.70193	9.30599e-42	2.75817e-41	up
BLT_RS0118210	411	hypothetical protein	166	65.2126	393	150.522	-1.20675	3.28587e-21	7.28842e-21	down
BLT_RS0120365	459	hypothetical protein	460	161.812	222	76.1358	1.08767	1.56592e-21	3.49599e-21	up
BLT_RS0115965	1035	hypothetical protein	662	103.272	616	93.6891	0.140496	0.0818058	0.094476
BLT_RS0102675	189	hypothetical protein	93	79.4486	173	144.09	-0.858874	2.12391e-06	3.21698e-06
BLT_RS22745	570	hypothetical protein	437	123.786	9	2.48551	5.63816	3.60241e-106	1.69687e-105	up
BLT_RS21530	679	DNA topoisomerase III	66	15.6942	26	6.02771	1.38055	1.32929e-05	1.95304e-05
BLT_RS0100090	1182	alcohol dehydrogenase	177	24.178	123	16.3808	0.561687	0.000825101	0.00111421
BLT_RS0115160	279	hypothetical protein	92	53.2413	149	84.068	-0.659011	0.000473762	0.000649293
BLT_RS0118935	879	hypothetical protein	527	96.8025	705	126.255	-0.383225	3.5231e-06	5.3001e-06
BLT_RS0112660	1080	hypothetical protein	719	107.491	246	35.8559	1.58393	4.46788e-57	1.51595e-56	up
BLT_RS0100095	1377	tRNA modification GTPase TrmE	1138	133.436	159	18.1766	2.876	7.48898e-186	4.96589e-185	up
BLT_RS0119585	720	hypothetical protein	2792	626.106	4567	998.498	-0.673352	1.2426e-86	5.25008e-86
BLT_RS0119905	2169	hypothetical protein	236	17.5678	120	8.70904	1.01235	1.21818e-10	2.12001e-10
BLT_RS0105675	477	hypothetical protein	449	151.982	1734	572.242	-1.91272	1.06039e-170	6.67921e-170	down
BLT_RS0104750	1770	succinate dehydrogenase flavoprotein subunit	2688	245.2	2815	250.354	-0.0300062	0.440383	0.470166
BLT_RS0105420	381	hypothetical protein	680	288.17	507	209.475	0.460145	4.61871e-08	7.44399e-08
BLT_RS0117945	1515	hypothetical protein	284	30.2671	159	16.5209	0.87346	4.34669e-10	7.42756e-10
BLT_RS0107220	723	2,3,4,5-tetrahydropyridine-2,6-carboxylate N-succinyltransferase	154	34.3912	406	88.3968	-1.36195	4.75149e-26	1.13897e-25	down
BLT_RS0107115	369	hypothetical protein	337	147.458	407	173.627	-0.235685	0.0262024	0.0317475
BLT_RS0108000	1278	hypothetical protein	718	90.7107	520	64.0503	0.502068	1.17691e-09	1.98325e-09
BLT_RS22765	486	hypothetical protein	104	34.5511	116	37.5725	-0.120946	0.534408	0.561963
BLT_RS0114065	1833	molecular chaperone DnaK	10858	956.428	21887	1879.63	-0.97472	0	0
BLT_RS0104525	1032	glyceraldehyde-3-phosphate dehydrogenase	31867	4985.7	20060	3059.85	0.704337	0	0
BLT_RS0118565	1242	hypothetical protein	433	56.29	519	65.7801	-0.224772	0.0164473	0.0202466
BLT_RS0108760	1350	glutamine synthetase	20884	2497.73	28605	3335.47	-0.417274	3.2622e-225	2.52737e-224
BLT_RS0111260	600	hypothetical protein	28	7.5348	12	3.14832	1.25899	0.00824149	0.010372
BLT_RS0100185	447	50S ribosomal protein L9	693	250.317	858	302.154	-0.271527	0.000219093	0.000305371
BLT_RS22480	825	hypothetical protein	74	14.4825	234	44.6489	-1.62432	6.66088e-20	1.44103e-19	down
BLT_RS0107390	189	hypothetical protein	4419	3775.09	2611	2174.67	0.795713	1.92617e-114	9.38947e-114
BLT_RS0107935	207	DNA-directed RNA polymerase subunit omega	211	164.58	263	200.002	-0.281224	0.0343727	0.0411578
BLT_RS0117310	798	hypothetical protein	549	111.08	413	81.4697	0.44726	1.71899e-06	2.61522e-06
BLT_RS0100270	3072	hypothetical protein	845	44.412	579	29.6692	0.581984	4.53047e-14	8.64616e-14
BLT_RS0105170	396	hypothetical protein	38	15.4936	33	13.118	0.240129	0.483676	0.512327
BLT_RS0120280	2028	methionyl-tRNA synthetase	406	32.3239	180	13.9718	1.21008	1.806e-22	4.09252e-22	up
BLT_RS0109585	201	4-oxalocrotonate tautomerase	778	624.955	448	350.857	0.832867	3.42575e-23	7.88132e-23
BLT_RS0105985	744	hypothetical protein	3297	715.502	11706	2476.76	-1.79143	0	0	down
BLT_RS0104500	2631	DNA polymerase I	1541	94.5686	926	55.4037	0.771378	4.95561e-39	1.42403e-38
BLT_RS0119775	207	hypothetical protein	5118	3992.04	910	692.022	2.52824	0	0	up
BLT_RS0114020	765	hypothetical protein	230	48.5435	536	110.294	-1.184	1.52198e-27	3.73613e-27	down
BLT_RS0120805	471	hypothetical protein	4093	1403.09	1719	574.518	1.28818	4.61268e-232	3.64093e-231	up
BLT_RS0109770	1182	aspartate aminotransferase	723	98.7611	470	62.5935	0.65793	6.89414e-15	1.34427e-14
BLT_RS0109455	678	hypothetical protein	305	72.6332	242	56.1868	0.370398	0.00276701	0.00360246
BLT_RS0105440	516	hypothetical protein	396	123.911	592	180.601	-0.543501	4.57191e-09	7.60909e-09
BLT_RS0106650	612	hypothetical protein	566	149.324	544	139.925	0.0937909	0.278827	0.305729
BLT_RS0106900	1464	proline:sodium symporter PutP	393	43.3428	414	44.5152	-0.0385059	0.704637	0.726591
BLT_RS0102535	1845	hypothetical protein	511	44.7187	195	16.6375	1.42644	1.97392e-35	5.389e-35	up
BLT_RS0101280	399	transposase	229	92.6675	33	13.0194	2.83141	2.69082e-38	7.69709e-38	up
BLT_RS0114500	255	hypothetical protein	342	216.546	4	2.46927	6.45445	1.70511e-82	6.98522e-82	up
BLT_RS0115610	1098	sugar ABC transporter ATP-binding protein	321	47.2028	516	73.9769	-0.648202	1.45757e-10	2.5273e-10
BLT_RS0118095	489	hypothetical protein	125	41.273	31	9.97933	2.04818	2.36062e-15	4.65828e-15	up
BLT_RS0109730	717	hypothetical protein	2512	565.673	590	129.533	2.12665	1.12443e-289	1.03224e-288	up
BLT_RS0105245	1212	hypothetical protein	55	7.32698	26	3.37691	1.11752	0.000756204	0.00102595
BLT_RS0106980	522	hypothetical protein	39	12.0631	14	4.22188	1.51464	0.000332331	0.000459551
BLT_RS0100805	3120	hypothetical protein	667	34.5173	449	22.6538	0.607567	3.24207e-12	5.87528e-12
BLT_RS0109095	918	homoserine O-succinyltransferase	1248	219.501	1012	173.535	0.339004	2.53514e-08	4.12111e-08
BLT_RS0120015	852	hypothetical protein	1048	198.603	132	24.3884	3.02562	6.42637e-180	4.19493e-179	up
BLT_RS0103560	2121	hypothetical protein	727	55.3425	5330	395.581	-2.83751	0	0	down
BLT_RS0120170	561	hypothetical protein	748	215.28	5047	1416.18	-2.71772	0	0	down
BLT_RS0101565	567	hypothetical protein	124	35.3105	148	41.0892	-0.218662	0.21223	0.235374
BLT_RS0100450	728	hypothetical protein	309	68.5318	160	34.5969	0.98613	5.69539e-13	1.05492e-12
BLT_RS0114710	780	antirepressor	484	100.188	59	11.9071	3.07282	2.32708e-85	9.74482e-85	up
BLT_RS0108205	303	hypothetical protein	198	105.509	263	136.635	-0.372967	0.00575183	0.00732917
BLT_RS21185	1067	hypothetical protein	84	12.711	62	9.14694	0.474717	0.0480797	0.0568133
BLT_RS0100900	1182	acetyl-CoA acetyltransferase	3550	484.927	724	96.4206	2.33035	0	0	up
BLT_RS0111870	465	hypothetical protein	256	88.8898	224	75.8305	0.229241	0.0820698	0.094752
BLT_RS0113880	654	transcriptional regulator	878	216.761	299	71.9684	1.59067	1.03772e-69	3.8423e-69	up
BLT_RS0101425	285	hypothetical protein	1016	575.591	181	99.9729	2.52543	6.32322e-145	3.58221e-144	up
BLT_RS22330	1256	transposase	270	34.7088	1466	183.735	-2.40426	4.87693e-192	3.30947e-191	down
BLT_RS0110360	1098	cobalt-precorrin-6A synthase	1783	262.189	4228	606.152	-1.20907	8.44063e-212	6.11257e-211	down
BLT_RS0114620	270	hypothetical protein	21	12.558	3	1.74907	2.84395	8.59329e-05	0.000122165
BLT_RS0100635	627	azoreductase	847	218.113	580	145.616	0.582905	3.895e-14	7.45225e-14
BLT_RS0109725	618	hypothetical protein	2211	577.651	646	164.548	1.81169	5.45235e-207	3.89616e-206	up
BLT_RS0113750	432	Fur family transcriptional regulator	1952	729.56	1987	724.04	0.0109567	0.811596	0.827162
BLT_RS0120330	330	hypothetical protein	1253	613.059	7244	3455.52	-2.4948	0	0	down
BLT_RS0109765	849	hypothetical protein	129	24.5328	96	17.7997	0.46286	0.0166976	0.0205413
BLT_RS0104340	1104	metallopeptidase	394	57.6225	760	108.366	-0.911208	1.49314e-25	3.5701e-25
BLT_RS0118980	756	hypothetical protein	279	59.5864	418	87.0369	-0.546642	7.3638e-07	1.13449e-06
BLT_RS22725	315	hypothetical protein	171	87.6497	85	42.4773	1.04506	1.86158e-08	3.03927e-08	up
BLT_RS0105830	648	hypothetical protein	1344	334.88	1509	366.575	-0.130464	0.0158018	0.0194837
BLT_RS0108765	636	hypothetical protein	1417	359.731	194	48.0168	2.90531	3.10661e-233	2.45729e-232	up
BLT_RS0114850	483	hypothetical protein	54	18.0514	28	9.12556	0.984128	0.00263027	0.00342917
BLT_RS0114225	426	cation:proton antiporter	205	77.6979	208	76.8604	0.0156359	0.912305	0.919617
BLT_RS0118130	1290	C4-dicarboxylate ABC transporter permease	1552	194.253	171	20.8668	3.21866	7.99798e-281	7.08366e-280	up
BLT_RS0113350	510	hypothetical protein	19	6.01518	19	5.86452	0.0365955	0.937679	0.941673
BLT_RS0101820	714	hypothetical protein	4831	1092.46	13	2.86612	8.57426	0	0	up
BLT_RS0105920	813	haloacid dehalogenase	2223	441.483	1559	301.859	0.548483	4.06507e-31	1.05485e-30
BLT_RS0104480	720	two-component system response regulator	56	12.558	47	10.2758	0.289362	0.309687	0.337702
BLT_RS0120720	534	transcription termination/antitermination factor NusG	2432	735.339	796	234.65	1.6479	1.85516e-199	1.28904e-198	up
BLT_RS0105925	915	hypothetical protein	2394	422.443	746	128.341	1.71877	2.57905e-208	1.84995e-207	up
BLT_RS0114585	423	hypothetical protein	111	42.3689	21	7.81498	2.43869	9.92929e-17	2.01958e-16	up
BLT_RS0119305	1362	magnesium transporter	4931	584.552	8017	926.581	-0.664587	2.95656e-147	1.69017e-146
BLT_RS0100045	1143	DNA polymerase III subunit beta	692	97.7518	851	117.201	-0.261792	0.000378221	0.000520813
BLT_RS0101130	549	hypothetical protein	999	293.804	230	65.9484	2.15545	2.22882e-118	1.10941e-117	up
BLT_RS0109170	780	hypothetical protein	627	129.789	779	157.214	-0.276562	0.000338603	0.000467967
BLT_RS0104145	1077	3-deoxy-7-phosphoheptulonate synthase	4432	664.43	12217	1785.66	-1.42626	0	0	down
BLT_RS0104935	783	hypothetical protein	2349	484.38	298	59.9105	3.01526	0	0	up
BLT_RS0120240	846	glycine/betaine ABC transporter	94	17.94	38	7.07069	1.34326	3.58082e-07	5.58052e-07
BLT_RS0100175	939	hypothetical protein	869	149.424	369	61.8599	1.27233	7.97242e-50	2.51505e-49	up
BLT_RS0111765	2820	hypothetical protein	1341	76.7794	687	38.3492	1.00152	3.0531e-52	9.8709e-52	up
BLT_RS0108750	1269	hypothetical protein	945	120.236	333	41.3077	1.54139	1.29327e-71	4.82165e-71	up
BLT_RS0119170	1002	hypothetical protein	232	37.384	1404	220.571	-2.56075	1.4628e-197	1.01268e-196	down
BLT_RS0118090	1113	cupin	382	55.4158	110	15.5577	1.83266	7.43968e-38	2.10893e-37	up
BLT_RS0117415	1329	cytochrome D ubiquinol oxidase subunit I	370	44.9513	9408	1114.35	-4.6317	0	0	down
BLT_RS0105600	360	hypothetical protein	148	66.378	202	88.3278	-0.412163	0.00789623	0.00995405
BLT_RS0100980	642	fructose-6-phosphate aldolase	541	136.059	706	173.108	-0.347444	2.29732e-05	3.34664e-05
BLT_RS0106325	1140	hypothetical protein	150	21.2447	62	8.56122	1.31122	2.76492e-10	4.7548e-10	up
BLT_RS0117605	390	hypothetical protein	504	208.656	863	348.333	-0.739341	1.31591e-20	2.88156e-20
BLT_RS0105445	465	molybdenum cofactor biosynthesis protein MoaE	400	138.89	495	167.572	-0.270833	0.00510484	0.00652237
BLT_RS0107635	762	hypothetical protein	4536	961.132	6410	1324.19	-0.462308	3.19577e-62	1.13111e-61
BLT_RS0113310	858	hypothetical protein	159	29.9209	193	35.4094	-0.242979	0.114955	0.130798
BLT_RS0107625	513	hypothetical protein	1541	485.01	1161	356.257	0.445094	1.46721e-15	2.91357e-15
BLT_RS0115635	909	hydroxymethylglutaryl-CoA lyase	506	89.8776	280	48.489	0.890306	2.52727e-17	5.18793e-17
BLT_RS0100370	816	hypothetical protein	302	59.756	214	41.2831	0.533533	3.05019e-05	4.42289e-05
BLT_RS0115105	300	hypothetical protein	286	153.925	111	58.2439	1.40205	4.59244e-20	9.97541e-20	up
BLT_RS0100255	1218	hypothetical protein	1840	243.913	1249	161.422	0.595528	6.13861e-30	1.5713e-29
BLT_RS0119020	780	hypothetical protein	1405	290.835	1181	238.344	0.287157	4.36949e-07	6.7872e-07
BLT_RS21990	483	hypothetical protein	260	86.9143	22	7.17008	3.59953	3.91265e-53	1.27482e-52	up
BLT_RS0109855	1149	hypothetical protein	958	134.62	182	24.9345	2.43268	3.90836e-131	2.09762e-130	up
BLT_RS0110920	366	hypothetical protein	24	10.5875	10	4.30098	1.29963	0.0121668	0.0151054
BLT_RS0100545	1017	hypothetical protein	180	28.577	1549	239.761	-3.06867	8.69208e-262	7.33674e-261	down
BLT_RS0104515	600	dephospho-CoA kinase	902	242.728	935	245.306	-0.0152434	0.820862	0.835477
BLT_RS0100515	345	hypothetical protein	160	74.88	285	130.039	-0.796294	1.17293e-08	1.9283e-08
BLT_RS0102120	1035	hypothetical protein	31	4.836	39	5.93161	-0.29461	0.394493	0.424414
BLT_RS0107365	960	2-nitropropane dioxygenase	938	157.76	350	57.3912	1.45883	1.11438e-65	4.03507e-65	up
BLT_RS22265	534	transposon DNA-invertase	81	24.4911	35	10.3175	1.24716	8.17391e-06	1.21275e-05	up
BLT_RS0109165	198	hypothetical protein	212	172.876	210	166.956	0.0502705	0.720403	0.742036
BLT_RS22040	618	hypothetical protein	489	127.757	23	5.85852	4.44672	1.41325e-111	6.81867e-111	up
BLT_RS0107950	954	methionyl-tRNA formyltransferase	252	42.6498	307	50.6569	-0.248219	0.042446	0.0504723
BLT_RS0113025	1209	hypothetical protein	126	16.8271	107	13.9318	0.272408	0.150216	0.169133
BLT_RS22355	2010	NAD-dependent DNA ligase LigA	947	76.071	389	30.4651	1.32019	3.20527e-57	1.0895e-56	up
BLT_RS0111855	786	cytochrome CBB3	2881	591.815	1446	289.597	1.0311	1.99827e-115	9.81703e-115	up
BLT_RS0107675	351	hypothetical protein	88	40.48	47	21.0785	0.941438	0.000215126	0.000300397
BLT_RS0113715	1104	4-hydroxy-3-methylbut-2-en-1-yl diphosphate synthase	2729	399.116	3089	440.451	-0.142172	0.000172817	0.000242664
BLT_RS0109125	1161	hypothetical protein	697	96.9317	1190	161.348	-0.735135	1.51968e-27	3.73292e-27
BLT_RS0105865	792	hypothetical protein	310	63.1977	611	121.441	-0.942309	5.64614e-22	1.26878e-21
BLT_RS0115430	1086	MFS transporter	2956	439.481	3260	472.538	-0.10463	0.00426227	0.00547923
BLT_RS0115555	183	hypothetical protein	383	337.919	379	326.014	0.0517421	0.620568	0.64644
BLT_RS0115520	282	hypothetical protein	754	431.705	1698	947.845	-1.1346	4.22126e-78	1.66077e-77	down
BLT_RS0120535	750	methionine aminopeptidase	4674	1006.22	2438	511.707	0.975555	5.8461e-170	3.66401e-169
BLT_RS0111205	447	hypothetical protein	213	76.9373	61	21.4818	1.84057	5.86466e-22	1.3171e-21	up
BLT_RS0120765	483	2-C-methyl-D-erythritol 2,4-cyclodiphosphate synthase	214	71.5372	56	18.2511	1.97071	5.16544e-24	1.20676e-23	up
BLT_RS21560	950	transposase	2018	342.975	11757	1948.15	-2.50593	0	0	down
BLT_RS0110680	900	aldo/keto reductase	595	106.743	498	87.1035	0.293339	0.000794507	0.00107482
BLT_RS0105685	2034	hypothetical protein	2676	212.422	4604	356.314	-0.746214	3.49724e-104	1.63508e-103
BLT_RS0105900	708	hypothetical protein	310	70.6958	1212	269.475	-1.93045	2.24564e-121	1.14189e-120	down
BLT_RS0108015	2049	ATP-dependent DNA helicase RecG	348	27.4222	268	20.5893	0.41345	0.000397827	0.000547012
BLT_RS0112630	891	tyrosine recombinase XerD	430	77.9212	200	35.3347	1.14093	1.00053e-21	2.23903e-21	up
BLT_RS0116320	1002	hypothetical protein	717	115.536	639	100.388	0.202753	0.009719	0.0121665
BLT_RS0103185	795	thymidylate synthase	509	103.375	806	159.594	-0.626519	7.70981e-15	1.50021e-14
BLT_RS0112145	3444	5-methyltetrahydrofolate--homocysteine methyltransferase	5928	277.914	7875	359.945	-0.373139	1.09087e-51	3.50882e-51
BLT_RS0111075	882	PaaX family transcrtiptional regulator	6124	1121.07	5957	1063.18	0.0764839	0.0035581	0.00459751
BLT_RS0118250	1004	ATP-dependent DNA helicase PcrA	278	44.7071	96	15.0517	1.57057	7.61224e-23	1.74278e-22	up
BLT_RS0111550	180	hypothetical protein	408	365.976	84	73.4608	2.3167	7.49801e-54	2.46859e-53	up
BLT_RS0111050	186	hypothetical protein	12	10.4168	4	3.38529	1.62156	0.0364345	0.0435368
BLT_RS0105480	864	hypothetical protein	260	48.5875	219	39.9006	0.284176	0.0314223	0.0377568
BLT_RS0111485	1425	hypothetical protein	327	37.0508	129	14.2503	1.37852	3.54482e-22	7.99439e-22	up
BLT_RS0105230	1686	terminase	223	21.3556	831	77.5876	-1.86121	6.65205e-80	2.65589e-79	down
BLT_RS0103210	1515	transporter	3361	358.196	332	34.4964	3.37623	0	0	up
BLT_RS0115900	777	IclR family transcriptional regulator	1823	378.818	215	43.5578	3.1205	0	0	up
BLT_RS22685	219	hypothetical protein	26	19.1688	40	28.7518	-0.584893	0.103518	0.118391
BLT_RS0106285	741	hypothetical protein	180	39.2211	381	80.9386	-1.0452	1.12693e-16	2.28843e-16	down
BLT_RS0107850	3189	carbamoyl phosphate synthase large subunit	253	12.8095	1968	97.1447	-2.92293	0	0	down
BLT_RS0115715	549	glycerol-3-phosphate responsive antiterminator	323	94.9938	457	131.037	-0.464064	8.24939e-06	1.22347e-05
BLT_RS0106290	2058	sodium:proton antiporter	193	15.1418	263	20.1168	-0.409866	0.00256574	0.0033485
BLT_RS0100145	198	hypothetical protein	153	124.765	145	115.279	0.114074	0.494989	0.523576
BLT_RS0103965	1191	hypothetical protein	650	88.1184	606	80.0958	0.137717	0.0908059	0.104264
BLT_RS0109830	1311	hypothetical protein	307	37.8095	493	59.1961	-0.646753	4.03086e-10	6.90352e-10
BLT_RS0103815	531	FMN reductase	105	31.9271	154	45.6536	-0.515945	0.00434773	0.00558719
BLT_RS0104640	756	23S rRNA methyltransferase	177	37.8022	171	35.606	0.0863486	0.576671	0.603211
BLT_RS0108620	891	recombinase RecA	2097	380.002	2814	497.159	-0.3877	7.40483e-21	1.63001e-20
BLT_RS0114905	1419	6-phosphogluconate dehydrogenase	2235	254.308	1232	136.671	0.895868	1.42031e-71	5.29008e-71
BLT_RS0117205	813	hypothetical protein	112	22.243	76	14.7154	0.596023	0.00501463	0.00641254
BLT_RS0113260	507	hypothetical protein	225	71.6539	653	202.747	-1.50056	5.15773e-47	1.59902e-46	down
BLT_RS0106060	1062	hypothetical protein	1081	164.349	3079	456.388	-1.4735	5.07664e-209	3.65537e-208	down
BLT_RS0109490	249	ferredoxin	197	127.741	108	68.2768	0.90376	8.79259e-08	1.40272e-07
BLT_RS0115750	1431	hypothetical protein	1367	154.239	719	79.093	0.963545	5.03697e-50	1.59434e-49
BLT_RS0102115	1821	polysaccharide biosynthesis protein EpsC	88	7.80257	82	7.08847	0.138475	0.531596	0.559317
BLT_RS0106280	438	hypothetical protein	255	94.0007	602	216.357	-1.20267	1.84222e-31	4.80019e-31	down
BLT_RS0116330	1773	hypothetical protein	1182	107.64	665	59.0421	0.866399	1.18446e-36	3.27398e-36
BLT_RS0104615	609	hypothetical protein	198	52.4944	212	54.7983	-0.0619683	0.663733	0.688174
BLT_RS0115530	900	sodium ABC transporter ATP-binding protein	254	45.5676	476	83.2555	-0.869538	1.9009e-15	3.76291e-15
BLT_RS0109815	249	hypothetical protein	404	261.967	1131	715.01	-1.44858	4.25914e-76	1.64987e-75	down
BLT_RS0101705	834	UDP pyrophosphate phosphatase	314	60.7895	617	116.458	-0.93791	5.15444e-22	1.16036e-21
BLT_RS21935	222	hypothetical protein	38	27.6373	60	42.5448	-0.622368	0.0350353	0.0419379
BLT_RS0111220	369	hypothetical protein	2084	911.877	368	156.989	2.53817	9.346e-297	8.83771e-296	up
BLT_RS0116625	498	hypothetical protein	1397	452.931	173	54.6847	3.05008	5.90072e-241	4.75714e-240	up
BLT_RS0118195	297	hypothetical protein	4	2.17455	15	7.9503	-1.8703	0.0107295	0.0133694
BLT_RS0101860	1536	multicopper oxidase	3978	418.156	353	36.177	3.5309	0	0	up
BLT_RS0114465	2616	hypothetical protein	1263	77.9526	31	1.8654	5.38504	9.52074e-302	9.18715e-301	up
BLT_RS0108670	795	hypothetical protein	337	68.4428	655	129.695	-0.922151	1.15441e-22	2.6286e-22
BLT_RS0118390	561	hypothetical protein	95	27.3417	8	2.24479	3.60645	1.67305e-20	3.65302e-20	up
BLT_RS0112775	888	hypothetical protein	94	17.0915	83	14.7134	0.216145	0.319397	0.347587
BLT_RS0116575	936	hypothetical protein	503	86.7675	305	51.2947	0.758345	1.88702e-13	3.551e-13
BLT_RS0114195	852	hypothetical protein	393	74.4763	281	51.9177	0.520555	3.29743e-06	4.96655e-06
BLT_RS0107975	882	hypothetical protein	278	50.891	639	114.046	-1.16414	1.07126e-31	2.79907e-31	down
BLT_RS0101700	2259	hypothetical protein	327	23.372	603	42.0194	-0.846272	2.30713e-18	4.8387e-18
BLT_RS0104810	1110	hypothetical protein	750	109.095	1169	165.783	-0.603717	1.35939e-19	2.91917e-19
BLT_RS0111585	903	hypothetical protein	4123	737.209	27293	4757.87	-2.69017	0	0	down
BLT_RS0106395	264	competence protein ComG	70	42.8114	21	12.5217	1.77356	7.33536e-08	1.17273e-07	up
BLT_RS0110620	582	phenolic acid decarboxylase subunit B	80	22.1938	19	5.13901	2.1106	1.05087e-10	1.83137e-10	up
BLT_RS0103115	1026	methionine ABC transporter ATP-binding protein	702	110.473	185	28.384	1.96054	2.35668e-74	9.03633e-74	up
BLT_RS0104360	1116	hypothetical protein	1036	149.886	1467	206.926	-0.465249	1.16943e-15	2.32591e-15
BLT_RS0110230	795	haloacid dehalogenase	846	171.818	823	162.96	0.0763608	0.279593	0.30648
BLT_RS0119180	390	hypothetical protein	44	18.216	193	77.9007	-2.09643	5.94788e-23	1.36422e-22	down
BLT_RS0104715	978	electron transfer flavoprotein subunit alpha	19462	3213.02	2672	430.077	2.90126	0	0	up
BLT_RS0114725	210	hypothetical protein	155	119.173	81	60.7176	0.97287	4.47236e-07	6.93983e-07
BLT_RS0100795	933	hypothetical protein	366	63.338	91	15.3535	2.0445	9.33885e-42	2.76574e-41	up
BLT_RS0110875	474	hypothetical protein	232	79.0269	81	26.9002	1.55473	4.56439e-19	9.69677e-19	up
BLT_RS0113120	1782	hypothetical protein	581	52.6421	1230	108.654	-1.04545	3.3032e-50	1.04819e-49	down
BLT_RS0109940	489	hypothetical protein	131	43.2541	81	26.075	0.730169	0.000280797	0.00039022
BLT_RS0106520	945	class A beta-lactamase	127	21.6989	46	7.66257	1.50172	1.23342e-10	2.14556e-10	up
BLT_RS0108810	216	hypothetical protein	723	540.443	2416	1760.73	-1.70396	1.53311e-202	1.07318e-201	down
BLT_RS0100120	870	hypothetical protein	644	119.518	544	98.4302	0.28005	0.000838757	0.00113225
BLT_RS0115960	498	hypothetical protein	123	39.8787	36	11.3795	1.80919	4.69742e-13	8.73288e-13	up
BLT_RS0107925	264	hypothetical protein	169	103.359	560	333.913	-1.69181	6.29965e-48	1.97086e-47	down
BLT_RS0108480	996	hypothetical protein	698	113.152	696	110.001	0.0407353	0.598086	0.624053
BLT_RS0105635	426	chemotaxis protein CheW	1120	424.496	407	150.395	1.49699	4.7798e-81	1.93085e-80	up
BLT_RS0108745	1260	hypothetical protein	1177	150.824	337	42.1025	1.84089	1.55041e-113	7.53829e-113	up
BLT_RS0118730	222	hypothetical protein	18	13.0914	47	33.3268	-1.34807	0.000365866	0.000504353	down
BLT_RS0108835	441	hypothetical protein	475	173.908	429	153.133	0.183545	0.0559401	0.0656491
BLT_RS0106500	858	hypothetical protein	521	98.0428	703	128.978	-0.395646	1.83371e-06	2.78302e-06
BLT_RS0110355	648	precorrin-8X methylmutase	827	206.061	1684	409.087	-0.989337	2.56008e-62	9.07819e-62
BLT_RS0107490	1860	cytochrome C oxidase	5831	506.169	1110	93.9418	2.42978	0	0	up
BLT_RS0120100	741	hypothetical protein	467	101.757	503	106.856	-0.0705403	0.446533	0.476192
BLT_RS0114090	345	hypothetical protein	72	33.696	93	42.4339	-0.332638	0.140245	0.158379
BLT_RS0102110	765	hypothetical protein	9	1.89953	13	2.67504	-0.493919	0.425907	0.455613
BLT_RS0115220	573	hypothetical protein	23	6.48094	11	3.02195	1.10073	0.0314186	0.0377764
BLT_RS21280	352	GntR family transcriptional regulator	108	49.5389	28	12.5217	1.98413	5.52082e-13	1.02309e-12	up
BLT_RS0108870	474	hypothetical protein	73	24.8662	55	18.2656	0.44506	0.0824785	0.0951656
BLT_RS0101835	261	hypothetical protein	1539	952.057	360	217.125	2.13252	6.83878e-179	4.44874e-178	up
BLT_RS0110135	711	cytochrome C biogenesis protein	525	119.222	34	7.52763	3.98531	6.9781e-113	3.38411e-112	up
BLT_RS0107270	546	peptide deformylase	7000	2070	11180	3223.28	-0.638898	6.05912e-191	4.09696e-190
BLT_RS0113850	369	cytochrome C551	502	219.656	593	252.975	-0.203749	0.0196573	0.0240645
BLT_RS0105495	309	50S ribosomal protein L21	1891	988.094	1093	556.814	0.827452	2.23945e-53	7.32187e-53
BLT_RS0115165	1578	stage V sporulation protein B	2081	212.927	14167	1413.25	-2.73059	0	0	down
BLT_RS22270	168	transposase	79	75.9247	35	32.795	1.21109	1.673e-05	2.45326e-05	up
BLT_RS0120810	186	hypothetical protein	5	4.34032	16	13.5412	-1.64148	0.0161185	0.0198483
BLT_RS0118905	642	hypothetical protein	2000	502.991	1595	391.088	0.363039	5.4249e-14	1.03322e-13
BLT_RS0108785	840	manganese catalase	473	90.9174	434	81.3316	0.160741	0.0935243	0.107189
BLT_RS0109390	1662	hypothetical protein	127	12.3378	65	6.15646	1.00291	2.79021e-06	4.21267e-06
BLT_RS0106080	732	hypothetical protein	253	55.8052	298	64.0846	-0.199579	0.105014	0.12003
BLT_RS0109960	180	hypothetical protein	29	26.013	11	9.61986	1.43514	0.00295055	0.0038315
BLT_RS0111265	310	CDP-diacylglycerol--serine O-phosphatidyltransferase	12	6.25007	7	3.55455	0.814203	0.226979	0.2507
BLT_RS0120940	810	seryl-tRNA synthetase	199	39.6673	153	29.7341	0.415832	0.00709415	0.00897894
BLT_RS0108850	1764	multidrug ABC transporter ATP-binding protein	582	53.2708	474	42.2988	0.332728	0.000185674	0.000260137
BLT_RS22550	1227	hypothetical protein	165	21.7122	68	8.72395	1.31545	3.2233e-11	5.70695e-11	up
BLT_RS21810	2289	hypothetical protein	1701	119.984	1750	120.349	-0.00437624	0.928995	0.934443
BLT_RS0104345	684	metal-dependent hydrolase	378	89.2279	255	58.6858	0.604485	1.78212e-07	2.81454e-07
BLT_RS0114880	558	6-phospho 3-hexuloisomerase	2510	726.281	552	155.723	2.22154	1.6376e-305	1.59656e-304	up
BLT_RS0103845	1188	hypothetical protein	435	59.1205	343	45.4492	0.379402	0.000257184	0.000358064
BLT_RS0109335	1161	hypothetical protein	73	10.1521	49	6.64374	0.61171	0.0204081	0.0249029
BLT_RS0119840	186	protein translocase TatA	1036	899.315	340	287.75	1.64401	8.2493e-86	3.46599e-85	up
BLT_RS0120830	312	hypothetical protein	484	250.47	466	235.115	0.0912726	0.329573	0.358249
BLT_RS0103830	297	hypothetical protein	279	151.675	108	57.2422	1.40583	1.09882e-19	2.37041e-19	up
BLT_RS0104260	993	hypothetical protein	578	93.9818	675	107.005	-0.187222	0.0218142	0.0265843
BLT_RS0101025	855	SAM-dependent methyltransferase	142	26.8156	126	23.1981	0.209063	0.235958	0.260312
BLT_RS0120050	720	hypothetical protein	642	143.969	844	184.526	-0.358074	1.91617e-06	2.90467e-06
BLT_RS0116930	297	hypothetical protein	486	264.207	315	166.956	0.6622	1.35847e-10	2.35981e-10
BLT_RS0106625	1155	stage III sporulation protein AE	319	44.5937	201	27.3945	0.702956	4.18365e-08	6.74858e-08
BLT_RS0113185	435	hypothetical protein	717	266.131	169	61.157	2.12155	7.44026e-84	3.06799e-83	up
BLT_RS0100660	831	hypothetical protein	589	114.44	855	161.962	-0.501061	6.03774e-11	1.05906e-10
BLT_RS0106260	378	hypothetical protein	69	29.4729	40	16.6578	0.823192	0.00344962	0.00446191
BLT_RS0102215	654	capsular biosynthesis protein	78	19.2567	180	43.3255	-1.16986	4.32718e-10	7.39758e-10	down
BLT_RS21405	381	hypothetical protein	138	58.4816	126	52.0588	0.16784	0.344816	0.373418
BLT_RS22800	366	hypothetical protein	25	11.0287	48	20.6447	-0.904511	0.00907051	0.0113792
BLT_RS0109285	498	NADPH-dependent 7-cyano-7-deazaguanine reductase	301	97.5893	125	39.512	1.30443	5.34756e-19	1.1335e-18	up
BLT_RS0118545	633	hypothetical protein	675	172.173	4140	1029.54	-2.58008	0	0	down
BLT_RS0116230	1140	epoxyqueuosine reductase	20937	2965.34	91091	12578.2	-2.08466	0	0	down
BLT_RS0106785	798	hypothetical protein	112	22.6611	103	20.3181	0.15745	0.42382	0.453766
BLT_RS0106415	393	hypothetical protein	61	25.0612	95	38.0522	-0.602523	0.00997425	0.0124653
BLT_RS0103620	1251	hypothetical protein	686	88.5384	309	38.8821	1.1872	8.85662e-36	2.42321e-35	up
BLT_RS0112285	591	ATP--cob(I)alamin adenosyltransferase	79	21.5826	85	22.6402	-0.0690146	0.759437	0.77673
BLT_RS0109580	789	4-oxalocrotonate decarboxylase	2446	500.547	1386	276.525	0.856093	1.68371e-72	6.33996e-72
BLT_RS0102580	147	hypothetical protein	89	97.7547	746	798.859	-3.0307	1.11876e-125	5.81415e-125	down
BLT_RS0100970	408	chemotaxis protein CheY	50	19.7868	15	5.78735	1.77356	5.3836e-06	8.03493e-06
BLT_RS0114745	210	hypothetical protein	297	228.351	105	78.708	1.53667	1.38823e-23	3.21534e-23	up
BLT_RS0112310	579	hypothetical protein	34	9.48125	25	6.79689	0.480202	0.203768	0.226322
BLT_RS0100755	222	hypothetical protein	208	151.278	298	211.306	-0.482133	0.000192365	0.000269211
BLT_RS0104130	450	general stress protein	205	73.554	74	25.8862	1.50662	2.4926e-16	5.01309e-16	up
BLT_RS0107515	468	hypothetical protein	470	162.15	444	149.343	0.118697	0.213677	0.23684
BLT_RS0104235	1143	hypothetical protein	551	77.8342	128	17.6284	2.1425	1.16889e-65	4.22841e-65	up
BLT_RS0115560	1500	coproporphyrinogen dehydrogenase HemZ	1555	167.38	600	62.9664	1.41048	2.0131e-102	9.31956e-102	up
BLT_RS0111390	828	metallophosphoesterase	691	134.745	635	120.724	0.158525	0.0455099	0.0538779
BLT_RS0115725	1545	carbon-nitrogen hydrolase	447	46.7137	301	30.6681	0.607107	1.20275e-08	1.97389e-08
BLT_RS0118550	206	RNA polymerase subunit sigma	124	97.1895	429	327.823	-1.75404	5.79162e-39	1.663e-38	down
BLT_RS0116510	1788	hypothetical protein	387	34.9469	175	15.407	1.18157	9.36646e-21	2.05463e-20	up
BLT_RS0118925	1080	hypothetical protein	308	46.046	88	12.8265	1.84395	4.27368e-31	1.1067e-30	up
BLT_RS0104510	636	membrane protein	978	248.283	667	165.089	0.588743	2.3723e-16	4.77625e-16
BLT_RS0102495	582	hypothetical protein	457	126.782	407	110.083	0.203761	0.0380648	0.0454202
BLT_RS0119335	909	hypothetical protein	101	17.94	143	24.764	-0.465064	0.0124558	0.015454
BLT_RS0104115	1098	nicotinate phosphoribosyltransferase	1523	223.956	1040	149.101	0.586928	1.84861e-24	4.36471e-24
BLT_RS0117910	384	membrane protein	40	16.8188	25	10.2484	0.714667	0.0488556	0.0576579
BLT_RS0114695	852	hypothetical protein	1183	224.187	15	2.77141	6.33794	1.53753e-281	1.36818e-280	up
BLT_RS0115020	2640	alanyl-tRNA synthetase	745	45.5635	341	20.3329	1.16406	1.44088e-37	4.04497e-37	up
BLT_RS0112465	513	hypothetical protein	329	103.548	272	83.4642	0.311076	0.00835882	0.0105056
BLT_RS0112225	222	hypothetical protein	5039	3664.85	342	242.506	3.91766	0	0	up
BLT_RS0103670	711	hypothetical protein	221	50.1866	194	42.9517	0.224585	0.113186	0.128979
BLT_RS22555	756	hypothetical protein	663	141.598	1137	236.749	-0.741556	9.06121e-27	2.19858e-26
BLT_RS0112100	1350	germination protein YpeB	288	34.4448	138	16.0914	1.098	2.98546e-14	5.72947e-14	up
BLT_RS0105310	746	hypothetical protein	24	5.19442	15	3.1652	0.714667	0.12705	0.144017
BLT_RS0117905	441	hypothetical protein	150	54.9184	113	40.3356	0.445235	0.0127712	0.0158297
BLT_RS0103140	786	Fe-S cluster assembly ATPase SufC	1762	361.95	1352	270.771	0.418714	7.39017e-16	1.47374e-15
BLT_RS0118860	1194	hypothetical protein	621	83.9754	444	58.5366	0.520629	4.98089e-09	8.2861e-09
BLT_RS0113055	435	hypothetical protein	68	25.2397	267	96.6208	-1.93664	3.10019e-28	7.70555e-28	down
BLT_RS0111420	1053	hypothetical protein	5797	888.874	2353	351.757	1.3374	0	0	up
BLT_RS0110780	1566	hypothetical protein	138	14.2283	61	6.13178	1.21438	1.1876e-08	1.95157e-08
BLT_RS0100100	1899	tRNA uridine 5-carboxymethylaminomethyl modification protein	2097	178.295	383	31.7484	2.48951	3.46513e-292	3.22018e-291	up
BLT_RS0100995	1269	transcription termination factor Rho	2224	282.969	2034	252.312	0.165433	0.000183878	0.000257811
BLT_RS0112890	216	hypothetical protein	80	59.8	84	61.2173	-0.0337938	0.880787	0.891419
BLT_RS0100310	1464	hypothetical protein	171	18.8591	135	14.5158	0.377632	0.0225144	0.0273933
BLT_RS0103465	474	S-ribosylhomocysteinase	956	325.645	632	209.888	0.633682	4.71617e-18	9.84187e-18
BLT_RS0113730	219	hypothetical protein	4270	3148.1	1538	1105.51	1.50978	2.91655e-307	2.85822e-306	up
BLT_RS0115810	585	alkaline phosphatase	229	63.204	228	61.3519	0.0429093	0.750539	0.768671
BLT_RS0100605	270	hypothetical protein	224	133.952	40	23.3209	2.52202	2.5632e-33	6.82978e-33	up
BLT_RS0106885	921	proline dehydrogenase	117	20.5112	145	24.7832	-0.272949	0.126793	0.143834
BLT_RS0117185	210	hypothetical protein	15	11.5329	16	11.9936	-0.0565139	0.913181	0.920008
BLT_RS0118225	1458	aspartyl/glutamyl-tRNA amidotransferase subunit A	239	26.467	220	23.7527	0.156103	0.2466	0.271735
BLT_RS0101305	1005	rod shape-determining protein MreB	2341	376.097	786	123.113	1.61112	5.14476e-186	3.42349e-185	up
BLT_RS0105105	213	hypothetical protein	54	40.9335	39	28.8226	0.506081	0.0928785	0.106482
BLT_RS0102485	1746	flagellar hook-associated protein FlgK	2747	254.027	1165	105.034	1.27412	8.54961e-154	5.04026e-153	up
BLT_RS0115385	645	hypothetical protein	260	65.0847	317	77.3657	-0.249376	0.0383499	0.0457458
BLT_RS0104240	1209	hypothetical protein	866	115.653	1276	166.14	-0.522594	9.93202e-17	2.01905e-16
BLT_RS0115145	2358	hypothetical protein	892	61.0782	769	51.3371	0.250656	0.000406302	0.000558258
BLT_RS0114545	1137	hypothetical protein	924	131.213	16	2.21518	5.88834	2.88649e-222	2.20907e-221	up
BLT_RS0117480	1044	hypothetical protein	290	44.85	28	4.22188	3.40915	1.15584e-56	3.90421e-56	up
BLT_RS22225	677	polysaccharide deacetylase	203	48.4142	466	108.354	-1.16225	1.66835e-23	3.8594e-23	down
BLT_RS0114460	2112	hypothetical protein	1012	77.3663	31	2.31056	5.06539	1.94482e-239	1.56456e-238	up
BLT_RS0120675	420	30S ribosomal protein S12	3547	1363.57	1552	581.689	1.22907	2.93038e-187	1.95342e-186	up
BLT_RS0118590	321	hypothetical protein	97	48.7901	13	6.3751	2.93607	9.8409e-18	2.04346e-17	up
BLT_RS0108220	813	hypothetical protein	379	75.2686	164	31.7543	1.2451	5.61715e-22	1.26302e-21	up
BLT_RS0101370	729	YqcI/YcgG family protein	93	20.5978	61	13.172	0.645017	0.00607297	0.00772793
BLT_RS0109040	1302	hypothetical protein	603	74.7776	458	55.3737	0.433406	1.11549e-06	1.70395e-06
BLT_RS0112515	645	sugar epimerase	1554	389.006	516	125.933	1.62714	6.64891e-126	3.46019e-125	up
BLT_RS0101870	360	hypothetical protein	407	182.54	24	10.4944	4.12052	1.13428e-89	4.9248e-89	up
BLT_RS0109265	1233	peptidase M29	443	58.0104	467	59.6214	-0.0395203	0.679506	0.70279
BLT_RS0109985	984	glyoxalase	2951	484.216	345	55.1916	3.13313	0	0	up
BLT_RS0119090	1974	hypothetical protein	506	41.3874	325	25.917	0.675293	2.63488e-11	4.67611e-11
BLT_RS0117655	192	hypothetical protein	16	13.455	20	16.3975	-0.285333	0.554174	0.581128
BLT_RS0110615	387	hypothetical protein	86	35.88	132	53.6923	-0.581534	0.00325872	0.00422368
BLT_RS0111500	942	hypothetical protein	1805	309.379	171	28.5755	3.43653	0	0	up
BLT_RS0120930	1041	peptide ABC transporter ATP-binding protein	379	58.7832	161	24.3458	1.27173	1.15837e-22	2.63603e-22	up
BLT_RS0101240	858	NADH:ubiquinone oxidoreductase subunit N	202	38.0127	549	100.724	-1.40586	2.8948e-36	7.97232e-36	down
BLT_RS0110555	465	hypothetical protein	3465	1203.14	2464	834.135	0.528449	1.46288e-44	4.4191e-44
BLT_RS0105665	225	hypothetical protein	415	297.804	1631	1141.09	-1.93798	1.7667e-163	1.08035e-162	down
BLT_RS0101900	690	hypothetical protein	929	217.386	2258	515.138	-1.2447	2.80607e-119	1.40789e-118	down
BLT_RS0107600	486	phosphopantetheine adenylyltransferase	95	31.5611	39	12.6321	1.32105	4.3767e-07	6.79559e-07	up
BLT_RS0114345	273	hypothetical protein	53	31.3457	3	1.72985	4.17955	3.47517e-13	6.49099e-13	up
BLT_RS0114590	264	hypothetical protein	75	45.8693	7	4.17391	3.45806	4.92371e-16	9.86573e-16	up
BLT_RS0103125	879	hypothetical protein	1059	194.524	603	107.988	0.849068	5.8945e-32	1.54123e-31
BLT_RS22720	285	hypothetical protein	57	32.292	39	21.5411	0.584083	0.0493218	0.0581716
BLT_RS0113885	2085	hypothetical protein	713	55.2139	825	62.2869	-0.173897	0.018243	0.0223914
BLT_RS0114950	237	hypothetical protein	84	57.2263	336	223.172	-1.9634	1.03781e-35	2.83742e-35	down
BLT_RS0120790	2442	ATP-dependent Clp protease ATP-binding protein	39526	2613.38	14944	963.318	1.43983	0	0	up
BLT_RS0107405	186	hypothetical protein	101	87.6745	24	20.3117	2.10984	3.9792e-13	7.42142e-13	up
BLT_RS0119210	1467	hypothetical protein	806	88.7095	498	53.4377	0.73123	1.84969e-19	3.96754e-19
BLT_RS0118385	528	hypothetical protein	139	42.5056	146	43.5279	-0.0342879	0.841017	0.855068
BLT_RS0107825	543	uracil phosphoribosyltransferase	1538	457.321	2286	662.712	-0.535174	6.57899e-30	1.68288e-29
BLT_RS21760	897	hypothetical protein	61	10.98	36	6.3177	0.797408	0.00745998	0.009423
BLT_RS0106905	1548	1-pyrroline-5-carboxylate dehydrogenase	754	78.644	506	51.4551	0.612023	8.92888e-14	1.69375e-13
BLT_RS0119440	453	hypothetical protein	10	3.56424	9	3.12747	0.188599	0.775854	0.792661
BLT_RS22035	250	hypothetical protein	14	9.04176	7	4.40765	1.0366	0.109906	0.125412
BLT_RS0106065	1239	hypothetical protein	261	34.0122	149	18.9306	0.845333	5.93389e-09	9.84112e-09
BLT_RS0107065	243	hypothetical protein	64	42.5245	62	40.1637	0.0823992	0.748551	0.767468
BLT_RS0100835	531	hypothetical protein	361	109.769	375	111.169	-0.0182962	0.863419	0.875721
BLT_RS0109085	858	hypothetical protein	216	40.6473	284	52.105	-0.358264	0.00571591	0.00728832
BLT_RS0101000	246	50S ribosomal protein L31	1774	1164.35	4015	2569.21	-1.1418	7.07311e-184	4.65739e-183	down
BLT_RS0100735	750	heme peroxidase	1543	332.177	892	187.22	0.827218	7.38516e-44	2.21672e-43
BLT_RS0114230	339	monovalent cation/H+ antiporter subunit C	159	75.729	207	96.1212	-0.344008	0.0231381	0.0281341
BLT_RS0114570	306	hypothetical protein	144	75.9812	205	105.458	-0.47296	0.00237606	0.0031128
BLT_RS0108845	1074	tRNA 2-selenouridine synthase	143	21.4979	155	22.7183	-0.0796575	0.633785	0.659298
BLT_RS0104285	996	hypothetical protein	244	39.5545	265	41.8828	-0.0825157	0.518954	0.547237
BLT_RS0118595	1221	hypothetical protein	479	63.341	338	43.5762	0.539598	1.12373e-07	1.7882e-07
BLT_RS0119050	864	short-chain dehydrogenase	103	19.2481	169	30.7908	-0.677783	0.000135652	0.000191189
BLT_RS0119925	474	tRNA threonylcarbamoyladenosine biosynthesis protein TsaE	169	57.567	29	9.63093	2.57949	3.73749e-26	8.97616e-26	up
BLT_RS0116190	1896	protein prkA	6371	542.543	4979	413.383	0.392259	3.09109e-47	9.5989e-47
BLT_RS22705	240	hypothetical protein	94	63.2385	143	93.7937	-0.568687	0.00268758	0.00350146
BLT_RS0109690	843	DNA repair protein	722	138.285	806	150.507	-0.122185	0.0980839	0.112313
BLT_RS0115655	466	biotin carboxylase	202	69.9891	159	53.7106	0.381924	0.0122071	0.0151505
BLT_RS0115595	1116	hypothetical protein	1160	167.826	609	85.9017	0.966206	6.64012e-43	1.98677e-42
BLT_RS0104350	249	hypothetical protein	248	160.812	151	95.4611	0.752387	2.89456e-07	4.52597e-07
BLT_RS0119075	702	hypothetical protein	784	180.32	444	99.5622	0.85689	1.93639e-24	4.56624e-24
BLT_RS0117815	1029	hypothetical protein	5424	851.078	810	123.913	2.77996	0	0	up
BLT_RS0101960	924	hypothetical protein	350	61.1591	399	67.9751	-0.152438	0.148619	0.167385
BLT_RS0100675	342	hypothetical protein	483	228.027	79	36.3622	2.64869	1.40305e-73	5.3364e-73	up
BLT_RS0101525	1392	integrase	142	16.4708	98	11.0824	0.571633	0.00234092	0.00306783
BLT_RS0104375	285	hypothetical protein	218	123.503	81	44.7393	1.46493	1.26079e-16	2.55751e-16	up
BLT_RS0105455	591	hypothetical protein	133	36.3353	271	72.1823	-0.990271	2.26299e-11	4.02939e-11
BLT_RS0100400	981	hypothetical protein	446	73.4059	109	17.4907	2.06931	2.92656e-51	9.3655e-51	up
BLT_RS0114475	561	hypothetical protein	357	102.747	14	3.92838	4.70902	6.72497e-84	2.77607e-83	up
BLT_RS0106195	657	adapter protein MecA	75369	18522.2	31661	7585.91	1.28786	0	0	up
BLT_RS0118685	1086	hypothetical protein	403	59.9156	42	6.08791	3.29891	5.8869e-76	2.27574e-75	up
BLT_RS0109515	777	hypothetical protein	72	14.9615	156	31.6047	-1.07888	5.20915e-08	8.37771e-08	down
BLT_RS21290	765	hypothetical protein	630	132.967	181	37.2448	1.83596	1.98631e-61	6.97797e-61	up
BLT_RS0110775	1197	cytochrome C biogenesis protein	1229	165.776	1361	178.983	-0.110587	0.0512333	0.0603319
BLT_RS0100050	1353	chromosomal replication initiator protein DnaA	1340	159.909	3009	350.085	-1.13046	3.92772e-136	2.15397e-135	down
BLT_RS0113195	651	hypothetical protein	1267	314.239	371	89.7102	1.80852	3.44352e-119	1.72542e-118	up
BLT_RS0112805	1092	L-ribulose-5-phosphate 4-epimerase	1803	266.586	858	123.684	1.10795	8.95839e-82	3.64617e-81	up
BLT_RS0102500	278	flagellar biosynthesis protein FliW	27	15.6814	20	11.3249	0.469555	0.26723	0.293696
BLT_RS0107890	1260	MFS transporter	484	62.0212	1243	155.292	-1.32415	4.85403e-73	1.83878e-72	down
BLT_RS0115405	1215	hypothetical protein	192	25.5147	80	10.3648	1.29963	1.32484e-12	2.42888e-12	up
BLT_RS0114680	687	hypothetical protein	167	39.2487	7	1.60395	4.61294	6.64642e-40	1.929e-39	up
BLT_RS0104900	1671	lon protease	147	14.2038	42	3.95659	1.84395	1.13187e-15	2.25239e-15
BLT_RS0107880	2352	formate dehydrogenase	5282	362.599	4604	308.139	0.234792	6.23027e-16	1.24506e-15
BLT_RS0105780	1023	hypothetical protein	2897	457.233	2000	307.754	0.571155	6.04681e-43	1.81068e-42
BLT_RS0114025	444	hypothetical protein	6649	2417.9	82773	29346.4	-3.60136	0	0	down
BLT_RS0114455	855	hypothetical protein	610	115.194	26	4.78692	4.58882	1.41641e-140	7.91723e-140	up
BLT_RS0113590	1026	hypothetical protein	1204	189.472	1852	284.147	-0.584653	1.6583e-28	4.14629e-28
BLT_RS0112345	1779	sensor histidine kinase	3748	340.164	811	71.7618	2.24494	0	0	up
BLT_RS21630	81	stage V sporulation protein M	253	504.313	241	468.361	0.1067	0.411171	0.440724
BLT_RS0120405	1056	chromosome partitioning protein ParA	7027	1074.41	2364	352.397	1.60827	0	0	up
BLT_RS0119910	1020	tRNA threonylcarbamoyladenosine modification protein TsaD	603	95.4514	274	42.2862	1.17458	3.77255e-31	9.79616e-31	up
BLT_RS0120155	540	stage V sporulation protein T	351	104.949	482	140.508	-0.420967	2.85374e-05	4.1444e-05
BLT_RS0106630	669	hypothetical protein	156	37.6499	99	23.2947	0.692641	0.000153899	0.000216504
BLT_RS21665	501	hypothetical protein	111	35.7726	919	288.753	-3.01291	1.65942e-153	9.76753e-153	down
BLT_RS0108030	948	hypothetical protein	656	111.728	248	41.1805	1.43995	1.3051e-45	3.97749e-45	up
BLT_RS0112520	174	hypothetical protein	123	114.136	88	79.6127	0.519678	0.00937293	0.011745
BLT_RS0102845	1179	hydroxyglutarate oxidase	212	29.0327	67	8.9456	1.69843	1.00621e-19	2.17187e-19	up
BLT_RS0105055	1023	hypothetical protein	95	14.9938	40	6.15507	1.28452	7.68071e-07	1.18283e-06
BLT_RS0120275	771	hydrolase TatD	112	23.4546	34	6.94182	1.75649	1.35018e-11	2.41891e-11	up
BLT_RS0110385	1389	cobyrinic acid a,c-diamide synthase	1220	141.815	1320	149.596	-0.0770612	0.178406	0.198973
BLT_RS0120920	897	diguanylate cyclase	155	27.9	77	13.5129	1.04593	8.39265e-08	1.34005e-07	up
BLT_RS22025	348	hypothetical protein	2	0.927931	0.5	0.226172	2.0366	1	1
BLT_RS0103470	564	isochorismatase	199	56.9691	174	48.5645	0.230277	0.123635	0.140293
BLT_RS0119390	333	hypothetical protein	178	86.306	286	135.198	-0.647542	1.86427e-06	2.82827e-06
BLT_RS0115830	1209	hypothetical protein	130	17.3613	118	15.364	0.17632	0.336143	0.364969
BLT_RS0118890	336	hypothetical protein	195	93.7045	1636	766.466	-3.03203	2.77479e-273	2.39025e-272	down
BLT_RS0119990	999	tRNA-dihydrouridine synthase	2092	338.113	677	106.677	1.66425	2.89211e-174	1.85262e-173	up
BLT_RS0114865	225	hypothetical protein	237	170.071	409	286.147	-0.750618	8.47276e-11	1.48136e-10
BLT_RS0119350	1008	sporulation protein	1349	216.081	2015	314.676	-0.542294	3.66536e-27	8.95108e-27
BLT_RS0110000	408	hypothetical protein	619	244.96	80	30.8659	2.98846	7.54349e-106	3.54441e-105	up
BLT_RS0116240	441	general stress protein	2165	792.655	1578	563.271	0.492865	2.82636e-25	6.72375e-25
BLT_RS0120545	1293	preprotein translocase subunit SecY	8257	1031.07	3737	454.96	1.18033	0	0	up
BLT_RS0105405	741	septum formation inhibitor	972	211.794	993	210.95	0.00575814	0.929503	0.934705
BLT_RS0119380	414	serine/threonine protein kinase	334	130.26	488	185.553	-0.510438	4.97696e-07	7.71174e-07
BLT_RS0105790	975	ABC transporter substrate-binding protein	2403	397.937	1843	297.556	0.419376	4.04811e-21	8.95807e-21
BLT_RS0107420	1839	GTP-binding protein	3754	329.593	700	59.9191	2.4596	0	0	up
BLT_RS21540	459	D-alanine aminotransferase	148	52.0612	227	77.8506	-0.5805	0.000117065	0.000165487
BLT_RS0112550	438	peptidylprolyl isomerase	1146	422.45	658	236.483	0.837043	1.17995e-33	3.16189e-33
BLT_RS0120635	291	50S ribosomal protein L23	2174	1206.23	745	403.006	1.58164	2.19144e-168	1.36441e-167	up
BLT_RS0115815	1188	hypothetical protein	2013	273.585	19166	2539.59	-3.21453	0	0	down
BLT_RS0112360	1656	cytochrome C biogenesis protein	3751	365.723	474	45.0575	3.02091	0	0	up
BLT_RS0116000	660	hypothetical protein	32	7.82837	27	6.43974	0.281708	0.454091	0.483843
BLT_RS0105505	285	50S ribosomal protein L27	1083	613.548	1169	645.682	-0.0736461	0.225913	0.249596
BLT_RS0111640	912	ribonuclease Z	1193	211.208	1156	199.532	0.0820482	0.168117	0.187998
BLT_RS0115740	1191	glucose-1-phosphate adenylyltransferase	1454	197.114	374	49.432	1.99551	1.84789e-155	1.09797e-154	up
BLT_RS0113830	1728	hypothetical protein	4754	444.202	392	35.7101	3.63681	0	0	up
BLT_RS0110225	903	LysR family transcriptional regulator	216	38.6217	296	51.6004	-0.41797	0.00112297	0.00150354
BLT_RS0102755	933	phosphorylase	196	33.9187	122	20.5839	0.720568	1.12313e-05	1.65595e-05
BLT_RS0108740	951	stage V sporulation protein K	20791	3529.88	450	74.487	5.56649	0	0	up
BLT_RS0119060	885	hypothetical protein	128	23.3524	210	37.3529	-0.67765	2.10917e-05	3.07849e-05
BLT_RS0109810	957	voltage-gated potassium channel	153	25.8134	211	34.7072	-0.427116	0.00501249	0.00641306
BLT_RS0100405	912	hypothetical protein	340	60.1934	329	56.7871	0.0840427	0.451228	0.480927
BLT_RS21680	243	hypothetical protein	110	73.0889	42	27.2077	1.42564	8.36032e-09	1.38227e-08	up
BLT_RS0102340	480	polysaccharide biosynthesis protein	136	45.747	31	10.1664	2.16986	1.03367e-17	2.14407e-17	up
BLT_RS0104940	984	delta-aminolevulinic acid dehydratase	804	131.925	537	85.9069	0.618869	7.48463e-15	1.45715e-14
BLT_RS0103440	444	hypothetical protein	84	30.5465	268	95.0168	-1.63718	8.40228e-23	1.91899e-22	down
BLT_RS0108420	4302	DNA polymerase III subunit alpha	2720	102.085	2042	74.7195	0.450219	8.66115e-27	2.10287e-26
BLT_RS0103445	273	transcriptional regulator	188	111.189	469	270.433	-1.28226	2.46913e-27	6.04545e-27	down
BLT_RS0114330	1488	hypothetical protein	199	21.5931	18	1.90423	3.5033	2.8558e-40	8.3462e-40	up
BLT_RS0107090	1380	hypothetical protein	15457	1808.47	19284	2199.72	-0.282548	3.44265e-74	1.31602e-73
BLT_RS0117530	456	hypothetical protein	1193	422.416	131	45.2226	3.22355	1.21468e-216	9.03942e-216	up
BLT_RS0119300	576	hypothetical protein	631	176.877	77	21.0434	3.07131	1.19219e-110	5.72282e-110	up
BLT_RS0108560	2358	cell division protein FtsK	974	66.693	309	20.6283	1.69291	3.81753e-84	1.58107e-83	up
BLT_RS0106515	1812	BlaR1 family beta-lactam sensor/signal transducer	1137	101.314	299	25.9754	1.96361	1.74e-119	8.76503e-119	up
BLT_RS0120300	873	16S rRNA (cytidine(1402)-2'-O)-methyltransferase	198	36.6198	488	87.9942	-1.26479	8.26981e-28	2.04068e-27	down
BLT_RS0114440	1011	hypothetical protein	557	88.9547	9	1.40133	5.9882	1.14028e-134	6.19923e-134	up
BLT_RS0103230	1014	peptidase M23	89	14.1715	186	28.8751	-1.02683	1.13672e-08	1.87041e-08	down
BLT_RS0119215	1659	hypothetical protein	599	58.2969	375	35.5823	0.712261	2.94756e-14	5.65962e-14
BLT_RS0102910	462	hypothetical protein	1257	439.297	198	67.464	2.70301	1.82525e-192	1.24308e-191	up
BLT_RS0101805	1080	C4-dicarboxylate ABC transporter substrate-binding protein	11	1.6445	15	2.18633	-0.410863	0.470438	0.499286
BLT_RS0112485	468	6,7-dimethyl-8-ribityllumazine synthase	1809	624.105	667	224.351	1.47603	4.47981e-127	2.34754e-126	up
BLT_RS0103270	501	hypothetical protein	1572	506.617	1742	547.342	-0.111548	0.0261185	0.031656
BLT_RS0104545	939	hypothetical protein	751	129.134	225	37.7195	1.77548	1.11756e-69	4.12984e-69	up
BLT_RS0118770	1203	hypothetical protein	448	60.1281	465	60.8466	-0.0171364	0.857583	0.870269
BLT_RS0104055	1074	peptidase M28	248	37.2831	315	46.1695	-0.308416	0.0114927	0.0143062
BLT_RS0116455	1128	carboxynorspermidine decarboxylase	3471	496.833	2470	344.696	0.527436	1.73879e-44	5.23997e-44
BLT_RS0110340	1647	cobalt-precorrin-3B C(17)-methyltransferase	3593	352.232	1664	159.041	1.14713	3.42403e-170	2.15314e-169	up
BLT_RS0117155	696	hypothetical protein	183	42.4529	37	8.36838	2.34284	2.07689e-25	4.95643e-25	up
BLT_RS22710	1308	hypothetical protein	368	45.4261	287	34.54	0.395251	0.000478411	0.00065495
BLT_RS0103940	2421	leucyl-tRNA synthetase	905	60.3558	1276	82.9668	-0.459043	1.62649e-13	3.06684e-13
BLT_RS0112220	1203	hypothetical protein	1195	160.386	453	59.2763	1.43602	2.86956e-81	1.16293e-80	up
BLT_RS0104445	232	exlusion protein FxsA	65	45.2366	214	145.203	-1.6825	3.3631e-19	7.15679e-19	down
BLT_RS0108610	1254	damage-inducible protein CinA	1950	251.074	960	120.51	1.05896	3.60313e-82	1.47447e-81	up
BLT_RS0120210	867	4-diphosphocytidyl-2C-methyl-D-erythritol kinase	740	137.809	199	36.1312	1.93135	8.97075e-77	3.49295e-76	up
BLT_RS0107590	390	hypothetical protein	231	95.634	64	25.8324	1.88834	1.86129e-24	4.3919e-24	up
BLT_RS0114115	198	hypothetical protein	1326	1081.29	8125	6459.62	-2.57869	0	0	down
BLT_RS22350	510	hypothetical protein	349	110.489	399	123.155	-0.156566	0.138213	0.156178
BLT_RS0119770	2433	hypothetical protein	18873	1252.46	1261	81.5871	3.94028	0	0	up
BLT_RS0105955	786	hypothetical protein	2159	443.502	581	116.36	1.93035	4.39676e-220	3.298e-219	up
BLT_RS0116420	1167	hypothetical protein	162	22.4135	39	5.26069	2.09104	6.37733e-20	1.38127e-19	up
BLT_RS0109105	840	hypothetical protein	165	31.7154	1226	229.752	-2.85683	8.25556e-194	5.67363e-193	down
BLT_RS0100945	1599	CTP synthase	217	21.9117	364	35.8345	-0.709648	5.49731e-09	9.13715e-09
BLT_RS0119340	744	hypothetical protein	676	146.703	1422	300.868	-1.03623	5.86315e-57	1.98579e-56	down
BLT_RS0117355	1191	radical SAM domain-containing protein	121	16.4036	183	24.1873	-0.560241	0.000808739	0.0010929
BLT_RS0113090	1476	hypothetical protein	2094	229.063	543	57.9111	1.98383	2.6965e-221	2.05533e-220	up
BLT_RS0120750	1398	cysteinyl-tRNA synthetase	1405	162.268	661	74.4291	1.12444	1.23456e-65	4.46169e-65	up
BLT_RS0120165	228	hypothetical protein	408	288.928	2522	1741.24	-2.59133	0	0	down
BLT_RS0107915	2709	ATPase	545	32.4827	1081	62.8153	-0.951443	3.43106e-38	9.79968e-38
BLT_RS0116315	192	hypothetical protein	56	47.0925	60	49.1925	-0.0629401	0.814303	0.829697
BLT_RS0102430	633	Xaa-Pro dipeptidase	72	18.3651	186	46.2549	-1.33264	2.11373e-12	3.85831e-12	down
BLT_RS0104790	1719	phosphoenolpyruvate-protein phosphotransferase	2159	202.788	3945	361.26	-0.833067	7.01546e-108	3.32112e-107
BLT_RS0101795	1128	hypothetical protein	3201	458.186	7	0.976872	8.87355	0	0	up
BLT_RS0113035	312	hypothetical protein	79	40.8825	118	59.5355	-0.542267	0.00900961	0.0113085
BLT_RS0116750	438	hypothetical protein	157	57.8749	390	140.165	-1.27611	7.61907e-23	1.74328e-22	down
BLT_RS0120840	489	adenosine deaminase	162	53.4898	677	217.936	-2.02657	4.83761e-73	1.8344e-72	down
BLT_RS21400	1077	hypothetical protein	125	18.7396	155	22.655	-0.273745	0.113415	0.129201
BLT_RS0100920	1143	acyl-CoA dehydrogenase	7033	993.481	1374	189.23	2.39235	0	0	up
BLT_RS0105670	318	hypothetical protein	430	218.326	1331	658.87	-1.59351	2.1871e-102	1.01126e-101	down
BLT_RS0115100	762	hypothetical protein	163	34.538	104	21.4846	0.684884	0.000127887	0.000180515
BLT_RS0120400	624	hypothetical protein	791	204.671	850	214.429	-0.0671896	0.34563	0.374193
BLT_RS0100230	708	two-component system response regulator	582	132.726	750	166.754	-0.329276	3.34441e-05	4.84023e-05
BLT_RS0118760	1185	hypothetical protein	1017	138.57	542	71.9995	0.94455	1.73173e-36	4.77967e-36
BLT_RS0112830	189	hypothetical protein	31	26.4829	9	7.496	1.82087	0.000264697	0.000368252	up
BLT_RS0109545	1215	4-hydroxybenzoate 3-monooxygenase	244	32.4249	590	76.4407	-1.23724	3.3499e-32	8.78331e-32	down
BLT_RS0117440	1686	trehalose-6-phosphate hydrolase	128	12.2579	104	9.71012	0.336156	0.0767542	0.0888052
BLT_RS0113975	554	hypothetical protein	1288	375.38	3420	971.773	-1.37227	1.43766e-208	1.0332e-207	down
BLT_RS0105835	1086	membrane protein	887	131.874	531	76.9686	0.776818	1.95536e-23	4.51228e-23
BLT_RS0102740	1137	hypothetical protein	3131	444.619	5696	788.603	-0.82673	6.31383e-153	3.69908e-152
BLT_RS0100335	249	hypothetical protein	49	31.7733	72	45.5179	-0.51862	0.0500987	0.0590511
BLT_RS0115365	633	LuxR family transcriptional regulator	131	33.4143	101	25.1169	0.411807	0.0304007	0.0366225
BLT_RS0100110	843	nucleoid occlusion protein	1029	197.085	542	101.209	0.961474	5.88076e-38	1.67079e-37
BLT_RS0108545	1111	RNase J family beta-CASP ribonuclease	1246	181.079	1369	193.972	-0.0992228	0.0787845	0.0910984
BLT_RS22655	357	hypothetical protein	68	30.7543	17	7.496	2.0366	5.86104e-09	9.72887e-09	up
BLT_RS22665	273	hypothetical protein	91	53.82	23	13.2621	2.02083	2.08939e-11	3.72732e-11	up
BLT_RS0119755	720	peptidase	249	55.8383	78	17.0534	1.7112	4.09628e-23	9.41246e-23	up
BLT_RS0103740	633	3-hexulose-6-phosphate synthase	922	235.176	133	33.0748	2.82994	1.49753e-148	8.62621e-148	up
BLT_RS0112495	654	riboflavin synthase subunit alpha	5566	1374.14	473	113.85	3.59332	0	0	up
BLT_RS0105695	1296	ABC transporter substrate-binding protein	58	7.22584	116	14.0897	-0.963404	1.89666e-05	2.77584e-05
BLT_RS0105400	525	hypothetical protein	513	157.77	409	122.635	0.363454	0.000137358	0.000193522
BLT_RS0109110	630	hypothetical protein	494	126.605	1454	363.306	-1.52085	1.92964e-104	9.03292e-104	down
BLT_RS0114000	1209	hypothetical protein	666	88.9432	144	18.7493	2.24605	1.28173e-83	5.27369e-83	up
BLT_RS0100865	483	hypothetical protein	36	12.0343	36	11.7329	0.0365955	0.914294	0.920884
BLT_RS0112355	1194	cytochrome C biogenesis protein	3421	462.609	819	107.976	2.09908	0	0	up
BLT_RS0109135	210	hypothetical protein	3710	2852.46	6952	5211.22	-0.869413	9.8128e-203	6.88173e-202
BLT_RS0103585	981	hypothetical protein	2857	470.226	5162	828.319	-0.816834	5.65282e-136	3.09551e-135
BLT_RS0112940	540	hypothetical protein	45	13.455	58	16.9076	-0.329532	0.248302	0.273451
BLT_RS0106085	945	type I pantothenate kinase	93	15.8897	25	4.16444	1.9319	4.85354e-11	8.53328e-11
BLT_RS21300	306	antibiotic biosynthesis monooxygenase	207	109.223	52	26.7504	2.02964	3.93749e-24	9.23889e-24	up
BLT_RS0115475	1002	hypothetical protein	2824	455.053	2885	453.238	0.00576431	0.879989	0.890851
BLT_RS0108550	744	translocation-enhancing protein TepA	124	26.91	105	22.216	0.276546	0.147632	0.166373
BLT_RS0119530	639	hypothetical protein	370	93.4902	262	64.543	0.534554	3.77606e-06	5.66935e-06
BLT_RS0117690	324	hypothetical protein	3459	1723.74	8262	4014.11	-1.21954	0	0	down
BLT_RS0115945	921	3-hydroxybutyryl-CoA dehydrogenase	163	28.5754	181	30.9362	-0.114522	0.461924	0.491356
BLT_RS0116785	945	antibiotic ABC transporter ATP-binding protein	103	17.5983	91	15.1586	0.215301	0.299103	0.326632
BLT_RS0111715	3591	hypothetical protein	1265	56.8775	2068	90.6533	-0.672503	4.03827e-40	1.17655e-39
BLT_RS0112025	267	hypothetical protein	5983	3618.04	19080	11249	-1.63652	0	0	down
BLT_RS0115770	1230	hypothetical protein	567	74.4291	493	63.0944	0.238357	0.00722128	0.00913372
BLT_RS0110860	435	hypothetical protein	148	54.9335	210	75.9939	-0.468197	0.00231083	0.00303051
BLT_RS0104170	633	acetoin dehydrogenase	1004	256.091	360	89.5257	1.51629	3.3413e-74	1.27857e-73	up
BLT_RS0105895	312	hypothetical protein	81	41.9175	90	45.4084	-0.115408	0.601188	0.626943
BLT_RS0115350	666	hypothetical protein	85	20.6068	119	28.1269	-0.448831	0.027366	0.0331042
BLT_RS0104635	207	spore protein	34	26.52	185	140.686	-2.40732	7.92031e-26	1.89615e-25	down
BLT_RS0107135	1206	hypothetical protein	84	11.246	39	5.09057	1.14351	2.23129e-05	3.25295e-05
BLT_RS0105630	2040	chemotaxis protein CheA	4642	367.401	1316	101.549	1.85518	0	0	up
BLT_RS0103785	1173	hypothetical protein	1582	217.758	709	95.1474	1.19449	5.96931e-81	2.40622e-80	up
BLT_RS0117585	744	hypothetical protein	231	50.1307	958	202.694	-2.01554	7.34326e-102	3.37468e-101	down
BLT_RS0108660	1563	ribonuclease	21989	2271.49	33502	3374.12	-0.57087	0	0
BLT_RS0109510	1305	hypothetical protein	60	7.42345	60	7.23751	0.0365955	0.889496	0.899027
BLT_RS0113960	999	hypothetical protein	6589	1064.93	17624	2777.08	-1.38281	0	0	down
BLT_RS0111155	879	ABC transporter permease	311	57.1264	161	28.8327	0.986449	4.731e-13	8.78881e-13
BLT_RS0103915	783	phospholipase	1614	332.818	1535	308.6	0.108997	0.0340201	0.0408133
BLT_RS0106845	357	hypothetical protein	412	186.335	273	120.377	0.630339	1.52965e-08	2.50276e-08
BLT_RS0106675	510	acetyl-CoA carboxylase biotin carboxyl carrier protein subunit	106	33.5584	42	12.9637	1.3722	3.93006e-08	6.34493e-08	up
BLT_RS0108125	1764	hypothetical protein	956	87.5033	1513	135.017	-0.625734	1.99728e-26	4.81516e-26
BLT_RS0108345	768	RNA polymerase sigma factor SigD	1225	257.537	800	163.975	0.651305	9.65695e-24	2.24496e-23
BLT_RS0103820	684	bacillithiol biosynthesis deacetylase BshB2	429	101.267	837	192.627	-0.927654	8.87272e-29	2.23179e-28
BLT_RS0119995	207	hypothetical protein	429	334.62	76	57.7952	2.5335	1.63496e-62	5.80856e-62	up
BLT_RS0115785	897	manganese catalase	391	70.38	245	42.9954	0.710982	8.73138e-10	1.47795e-09
BLT_RS0120680	249	50S ribosomal protein L7/L12	2280	1478.43	3299	2085.6	-0.496399	3.33192e-37	9.3052e-37
BLT_RS0118820	1194	hypothetical protein	510	68.9653	225	29.6638	1.21717	4.73474e-28	1.1745e-27	up
BLT_RS0114785	540	DNA methyltransferase	863	258.037	449	130.888	0.979241	4.76037e-33	1.26307e-32
BLT_RS0105325	216	hypothetical protein	126	94.185	290	211.345	-1.16603	2.74434e-15	5.40136e-15	down
BLT_RS0101115	714	ATP synthase subunit A	587	132.741	145	31.9682	2.0539	2.86051e-66	1.04076e-65	up
BLT_RS0118025	537	hypothetical protein	36	10.8241	18	5.27651	1.0366	0.0103625	0.0129377
BLT_RS0117390	384	hypothetical protein	236	99.2306	400	163.975	-0.724618	4.79312e-10	8.17561e-10
BLT_RS0120715	426	50S ribosomal protein L11	3485	1320.86	9327	3446.52	-1.38366	0	0	down
BLT_RS0113305	378	hypothetical protein	48	20.5029	6	2.49867	3.0366	8.70786e-10	1.47463e-09	up
BLT_RS0104435	396	hypothetical protein	357	145.559	1006	399.9	-1.45804	1.54177e-68	5.67523e-68	down
BLT_RS22805	2604	hypothetical protein	309	19.1594	286	17.2892	0.148187	0.210438	0.233524
BLT_RS0108485	1239	zinc protease	2070	269.752	1882	239.11	0.17396	0.000151426	0.000213104
BLT_RS0114285	1114	hypothetical protein	150	21.7406	138	19.5004	0.15689	0.356319	0.385102
BLT_RS0116580	195	hypothetical protein	116	96.048	205	165.489	-0.784904	1.7747e-06	2.69563e-06
BLT_RS0115805	825	hypothetical protein	181	35.4234	85	16.2186	1.12705	7.62822e-10	1.29412e-09	up
BLT_RS0101295	1536	symporter	6994	735.19	1114	114.168	2.68696	0	0	up
BLT_RS0102025	852	hypothetical protein	500	94.7535	316	58.3843	0.698599	8.66701e-12	1.55717e-11
BLT_RS0102760	873	prolipoprotein diacylglyceryl transferase	270	49.9361	120	21.6379	1.20652	2.11794e-15	4.18596e-15	up
BLT_RS0120030	924	cysteine synthase	38608	6746.37	9985	1701.08	1.98766	0	0	up
BLT_RS0112280	918	hypothetical protein	492	86.5341	497	85.2241	0.022008	0.810418	0.826184
BLT_RS0107855	780	hypothetical protein	88	18.216	604	121.896	-2.74238	1.36277e-92	6.01373e-92	down
BLT_RS0108705	2646	DNA mismatch repair protein MutS	2377	145.046	2056	122.316	0.245897	1.4457e-08	2.36644e-08
BLT_RS0111895	1128	prephenate dehydrogenase	2120	303.453	330	46.0525	2.72012	0	0	up
BLT_RS0115690	1407	stage V sporulation protein R	1254	143.903	1385	154.955	-0.106753	0.0574692	0.0674017
BLT_RS0117055	327	hypothetical protein	81	39.9947	25	12.0349	1.73259	1.22073e-08	2.00253e-08	up
BLT_RS0100670	1443	4-hydroxyphenylacetate 3-monooxygenase	5435	608.133	6297	686.936	-0.175789	4.30027e-11	7.58173e-11
BLT_RS0112640	459	Fur family transcriptional regulator	1753	616.644	8134	2789.59	-2.17754	0	0	down
BLT_RS0111410	204	hypothetical protein	97	76.7727	69	53.2436	0.527984	0.0192446	0.023567
BLT_RS0116765	612	LuxR family transcriptional regulator	145	38.2544	109	28.0365	0.44832	0.0137443	0.0170023
BLT_RS0113895	759	DNA repair protein RecO	3229	686.897	16308	3382.26	-2.29982	0	0	down
BLT_RS0114040	675	deoxyribose-phosphate aldolase	669	160.025	1165	271.688	-0.763656	9.77244e-29	2.45482e-28
BLT_RS0112930	1848	asparagine synthase	721	62.9939	346	29.4729	1.09582	3.37133e-33	8.96407e-33	up
BLT_RS0107605	1227	hypothetical protein	3963	521.488	3060	392.578	0.409657	2.09195e-32	5.5003e-32
BLT_RS0115170	240	hypothetical protein	2821	1897.83	8482	5563.34	-1.5516	0	0	down
BLT_RS0117110	189	hypothetical protein	41	35.0257	116	96.6151	-1.46383	2.5466e-09	4.26657e-09	down
BLT_RS0109820	912	hypothetical protein	405	71.701	478	82.5053	-0.202493	0.0373453	0.0446039
BLT_RS0104815	747	ribonuclease PH	347	75.0022	275	57.951	0.3721	0.00134767	0.00179357
BLT_RS0113400	876	hypothetical protein	89	16.404	264	47.4404	-1.53207	1.43996e-20	3.15138e-20	down
BLT_RS0112440	684	hypothetical protein	754	177.984	369	84.9218	1.06754	2.86067e-33	7.61702e-33	up
BLT_RS0107610	798	hypothetical protein	462	93.4769	296	58.3899	0.678891	1.56213e-10	2.70736e-10
BLT_RS0114685	345	hypothetical protein	198	92.664	2	0.912556	6.66595	4.03921e-48	1.26578e-47	up
BLT_RS0115880	201	hypothetical protein	74	59.443	11	8.6148	2.78662	2.97282e-13	5.57754e-13	up
BLT_RS0118380	195	hypothetical protein	50	41.4	108	87.1842	-1.07444	6.34672e-06	9.43506e-06	down
BLT_RS0120625	279	30S ribosomal protein S19	2372	1372.7	591	333.451	2.04147	7.8192e-260	6.55596e-259	up
BLT_RS0114610	288	hypothetical protein	62	34.7588	5	2.73292	3.66886	4.49804e-14	8.59296e-14	up
BLT_RS0102935	588	ATP-dependent Clp protease proteolytic subunit	14062	3861.31	4771	1277.26	1.59603	0	0	up
BLT_RS0111025	957	nitrilase	139	23.4514	103	16.9424	0.469036	0.0119104	0.0148017
BLT_RS0107715	1113	hypothetical protein	425	61.6537	112	15.8406	1.96056	9.9221e-46	3.02881e-45	up
BLT_RS0100165	234	30S ribosomal protein S18	1056	728.64	1889	1270.76	-0.802417	1.89674e-49	5.96863e-49
BLT_RS0117260	2208	dihydroxy-acid dehydratase	479	35.0269	303	21.6019	0.697303	2.53628e-11	4.50324e-11
BLT_RS0117705	2421	hypothetical protein	3507	233.887	4777	310.606	-0.409272	1.00168e-37	2.82674e-37
BLT_RS0120460	498	hypothetical protein	1024	331.998	703	222.216	0.579215	1.33849e-16	2.71365e-16
BLT_RS0114770	462	hypothetical protein	338	118.124	135	45.9982	1.36066	1.88895e-22	4.27791e-22	up
BLT_RS0103700	1458	hypothetical protein	279	30.8967	66	7.12582	2.11632	1.2872e-33	3.44197e-33	up
BLT_RS0111660	1248	threonine dehydratase	505	65.3344	496	62.5627	0.0625388	0.492849	0.521458
BLT_RS0101620	270	hypothetical protein	47	28.106	189	110.191	-1.97106	6.64109e-21	1.4636e-20	down
BLT_RS0115080	612	hypothetical protein	242	63.8453	460	118.319	-0.890031	1.60339e-15	3.18231e-15
BLT_RS0106680	1368	acetyl-CoA carboxylase biotin carboxylase subunit	488	57.5969	348	40.0444	0.524389	1.80962e-07	2.85319e-07
BLT_RS0100325	288	hypothetical protein	18	10.0913	29	15.8509	-0.65146	0.12694	0.143957
BLT_RS0115905	896	hypothetical protein	506	91.1817	270	47.4356	0.942774	6.42836e-19	1.35878e-18
BLT_RS0103265	645	hypothetical protein	3338	835.587	8342	2035.91	-1.28481	0	0	down
BLT_RS0100615	1359	glutamine synthetase	2315	275.04	3100	359.08	-0.38466	1.66172e-22	3.7701e-22
BLT_RS0117995	1353	hypothetical protein	993	118.499	780	90.7498	0.384915	2.17623e-08	3.54376e-08
BLT_RS0113615	2775	hypothetical protein	5857	340.783	1840	104.377	1.70705	0	0	up
BLT_RS0111505	459	hypothetical protein	516	181.511	2741	940.037	-2.37266	0	0	down
BLT_RS0101010	462	hypothetical protein	2478	866.013	595	202.733	2.09481	2.07611e-280	1.83018e-279	up
BLT_RS0100655	678	uracil-DNA glycosylase	238	56.6777	608	141.164	-1.31651	2.52217e-36	6.95117e-36	down
BLT_RS0109030	495	hypothetical protein	27	8.80691	8	2.5441	1.79148	0.0007618	0.00103224
BLT_RS0117135	720	ATP-binding protein	58	13.0065	49	10.713	0.279867	0.316545	0.344782
BLT_RS0120140	273	hypothetical protein	131	77.4772	108	62.2744	0.315131	0.0920656	0.105614
BLT_RS0101865	363	hypothetical protein	400	177.917	46	19.948	3.15689	1.31562e-72	4.96385e-72	up
BLT_RS0111275	1146	RNA methyltransferase	376	52.9747	1881	258.376	-2.2861	1.16673e-231	9.19012e-231	down
BLT_RS0113000	1248	hypothetical protein	1492	193.028	787	99.2679	0.959408	4.64765e-54	1.53551e-53
BLT_RS0114055	936	50S ribosomal protein L11 methyltransferase	1429	246.503	1710	287.587	-0.222395	1.62986e-05	2.39093e-05
BLT_RS0120835	1689	DNA polymerase III subunit gamma/tau	1316	125.803	1356	126.38	-0.00660215	0.90584	0.913833
BLT_RS0109520	1353	3-phenylpropionate dioxygenase	1443	172.2	122	14.1942	3.60071	3.40632e-286	3.09688e-285	up
BLT_RS0111055	1278	hypothetical protein	894	112.946	287	35.3508	1.67582	2.6047e-76	1.01002e-75	up
BLT_RS0113805	1326	DEAD/DEAH box helicase	1153	140.395	243	28.8477	2.28296	3.6085e-146	2.05043e-145	up
BLT_RS0119595	340	preprotein translocase subunit TatC	27	12.8218	16	7.40781	0.791483	0.0769528	0.0890076
BLT_RS0104280	501	lipid hydroperoxide peroxidase	295	95.0713	249	78.2367	0.281165	0.0232782	0.0282953
BLT_RS0105860	285	hypothetical protein	920	521.204	2550	1408.46	-1.4342	1.15754e-166	7.17145e-166	down
BLT_RS21570	204	DNA-binding protein	9	7.12324	6	4.62988	0.621558	0.408881	0.438519
BLT_RS0100770	504	hypothetical protein	299	95.7868	129	40.291	1.24937	9.31976e-18	1.93631e-17	up
BLT_RS22465	951	hypothetical protein	351	59.5925	252	41.7127	0.514643	1.3594e-05	1.9965e-05
BLT_RS0119185	1701	hypothetical protein	1384	131.37	962	89.0265	0.561331	9.0312e-21	1.98339e-20
BLT_RS0113210	1677	hypothetical protein	2070	199.298	3291	308.918	-0.6323	1.73584e-56	5.8476e-56
BLT_RS0119355	1182	hypothetical protein	928	126.764	1331	177.259	-0.483718	2.68381e-15	5.28498e-15
BLT_RS0107630	174	50S ribosomal protein L32	1235	1146	1679	1518.97	-0.406496	3.98173e-14	7.61433e-14
BLT_RS0111975	834	prenyltransferase	597	115.578	199	37.5609	1.62156	2.79994e-49	8.80348e-49	up
BLT_RS0110550	588	hypothetical protein	3689	1012.97	1846	494.2	1.03542	2.97033e-148	1.70839e-147	up
BLT_RS0113910	219	hypothetical protein	388	286.057	457	328.489	-0.199542	0.0447416	0.0530516
BLT_RS0110750	1215	hypothetical protein	720	95.68	212	27.4668	1.80053	3.79037e-68	1.39115e-67	up
BLT_RS0110520	981	catechol 2,3-dioxygenase	280	46.0844	211	33.8581	0.444779	0.000676522	0.000919826
BLT_RS0104255	1599	hypothetical protein	226	22.8205	105	10.3369	1.14253	3.63628e-12	6.58333e-12	up
BLT_RS0104315	1383	argininosuccinate lyase	7883	920.311	5303	603.598	0.608532	3.06382e-127	1.60776e-126
BLT_RS0104995	1113	hypothetical protein	244	35.3965	119	16.8306	1.07252	6.77475e-12	1.21952e-11	up
BLT_RS0120590	312	50S ribosomal protein L24	2450	1267.88	740	373.358	1.76378	6.75723e-221	5.11948e-220	up
BLT_RS0110855	390	hypothetical protein	457	189.198	2417	975.575	-2.36636	0	0	down
BLT_RS0101145	1413	F0F1 ATP synthase subunit beta	3349	382.682	1730	192.731	0.989554	3.27892e-125	1.69936e-124
BLT_RS0107775	840	hypothetical protein	2068	397.499	2029	380.234	0.0640629	0.155203	0.174436
BLT_RS0106600	282	hypothetical protein	82	46.9494	48	26.7942	0.809185	0.00168065	0.00222339
BLT_RS0115940	1602	hypothetical protein	195	19.6534	64	6.28878	1.64393	1.64266e-17	3.38861e-17
BLT_RS0118920	1110	hypothetical protein	477	69.3842	334	47.3666	0.550737	6.91878e-08	1.10753e-07
BLT_RS0100495	549	hypothetical protein	1620	476.439	924	264.94	0.846625	9.54371e-48	2.97836e-47
BLT_RS0102350	306	hypothetical protein	417	220.029	1343	690.881	-1.65074	1.44337e-108	6.85872e-108	down
BLT_RS0117430	1335	hypothetical protein	92	11.1268	57	6.72113	0.727267	0.00241756	0.00316168
BLT_RS0114670	399	hypothetical protein	236	95.5002	4	1.5781	5.91924	3.41637e-58	1.16757e-57	up
BLT_RS0119540	1032	hypothetical protein	1616	252.829	138	21.0498	3.58628	0	0	up
BLT_RS0104395	336	sporulation protein	50	24.0268	47	22.0195	0.125863	0.667537	0.691548
BLT_RS0101910	709	hypothetical protein	182	41.4467	207	45.9592	-0.149097	0.308605	0.336619
BLT_RS0108255	801	flagellar basal body rod protein FlgG	699	140.9	487	95.7073	0.557966	3.94073e-11	6.95434e-11
BLT_RS0112860	204	hypothetical protein	6	4.74882	1	0.771647	2.62156	0.044319	0.0525918
BLT_RS0109190	1320	hypothetical protein	487	59.569	621	74.057	-0.314076	0.000305907	0.000424489
BLT_RS0120760	1461	glutamyl-tRNA synthase	1182	130.627	2185	235.424	-0.849808	1.30644e-62	4.6458e-62
BLT_RS0100135	648	hypothetical protein	401	99.9159	506	122.92	-0.29894	0.00187131	0.00246956
BLT_RS0114855	567	hypothetical protein	125	35.5952	61	16.9354	1.07164	9.18177e-07	1.40939e-06	up
BLT_RS0112690	945	hypothetical protein	132	22.5531	137	22.8211	-0.0170424	0.92283	0.928738
BLT_RS0111135	1200	hypothetical protein	1474	198.327	391	51.2914	1.95109	4.97225e-153	2.91762e-152	up
BLT_RS0103430	183	hypothetical protein	516	455.264	1680	1445.13	-1.66642	3.98762e-137	2.1996e-136	down
BLT_RS0111115	462	phenylacetate-CoA oxygenase	5972	2087.1	7177	2445.4	-0.228571	1.19368e-19	2.57211e-19
BLT_RS0101610	447	hypothetical protein	923	333.395	416	146.499	1.18634	1.73087e-47	5.38381e-47	up
BLT_RS0117490	486	hypothetical protein	4676	1553.47	603	195.312	2.99164	0	0	up
BLT_RS0107245	453	thiol-disulfide oxidoreductase	183	65.2256	337	117.106	-0.844309	6.95318e-11	1.21794e-10
BLT_RS0120375	684	hypothetical protein	183	43.1976	65	14.9591	1.52993	4.82171e-15	9.46038e-15	up
BLT_RS0100555	1563	heme ABC transporter ATP-binding protein	243	25.1022	892	89.8369	-1.83949	2.63554e-84	1.09635e-83	down
BLT_RS0120985	1554	hypothetical protein	41	4.25989	62	6.28043	-0.560049	0.0512753	0.0603436
BLT_RS0101895	750	hypothetical protein	1494	321.628	1208	253.545	0.343155	7.02535e-10	1.19399e-09
BLT_RS0115340	1044	uroporphyrinogen decarboxylase	280	43.3035	92	13.8719	1.64232	2.0182e-24	4.75619e-24	up
BLT_RS0106135	183	hypothetical protein	52	45.8794	47	40.4292	0.182446	0.529501	0.55758
BLT_RS0119835	777	preprotein translocase subunit TatC	2115	439.495	576	116.694	1.91311	4.22379e-213	3.08845e-212	up
BLT_RS0115300	1116	hypothetical protein	267	38.6289	189	26.6592	0.535049	8.46904e-05	0.000120625
BLT_RS0100800	909	hypothetical protein	276	49.0242	33	5.71477	3.10073	7.23213e-50	2.28533e-49	up
BLT_RS0113470	363	hypothetical protein	186	82.7316	232	100.607	-0.282227	0.046173	0.0546287
BLT_RS0118415	324	hypothetical protein	23	11.4617	11	5.34437	1.10073	0.0314186	0.0377764
BLT_RS0102075	747	hypothetical protein	122	26.3696	109	22.9697	0.199149	0.294534	0.322016
BLT_RS0108780	297	hypothetical protein	154	83.72	31	16.4306	2.34919	1.05629e-21	2.36241e-21	up
BLT_RS0116175	894	hypothetical protein	446	80.5494	59	10.3887	2.95485	5.55429e-76	2.14937e-75	up
BLT_RS0113510	198	hypothetical protein	216	176.138	278	221.018	-0.327458	0.0119858	0.0148856
BLT_RS0121075	248	capsular biosynthesis protein	43	27.9951	218	138.374	-2.30532	1.02022e-28	2.56107e-28	down
BLT_RS0111030	1719	sulfite reductase	1329	124.829	2218	203.111	-0.702323	3.57538e-46	1.09763e-45
BLT_RS0110945	270	hypothetical protein	284	169.832	282	164.412	0.0467913	0.699623	0.721618
BLT_RS0101105	228	hypothetical protein	835	591.312	155	107.015	2.4661	2.47266e-116	1.22272e-115	up
BLT_RS0109700	2829	2-oxoglutarate dehydrogenase E1	32349	1846.26	23602	1313.3	0.491408	0	0
BLT_RS0102860	636	ATP phosphoribosyltransferase	237	60.1667	415	102.716	-0.771629	2.11266e-11	3.76526e-11
BLT_RS22560	1986	hypothetical protein	23667	1924.11	46328	3672.09	-0.932412	0	0
BLT_RS0109470	1440	hypothetical protein	153	17.1551	163	17.8186	-0.0547448	0.735961	0.756616
BLT_RS0111775	384	aspartate decarboxylase	243	102.174	101	41.4037	1.3032	1.29444e-15	2.57184e-15	up
BLT_RS0102975	1287	enolase	1369	171.747	8130	994.399	-2.53354	0	0	down
BLT_RS0110980	327	hypothetical protein	300	148.128	749	360.564	-1.28341	1.06531e-42	3.1774e-42	down
BLT_RS0100790	1584	hypothetical protein	2762	281.536	2450	243.478	0.209527	1.61372e-07	2.55286e-07
BLT_RS0101135	1512	F0F1 ATP synthase subunit alpha	3174	338.938	840	87.4533	1.95444	0	0	up
BLT_RS0118870	348	ArsR family transcriptional regulator	1292	599.444	74	33.4735	4.16253	6.90166e-282	6.18527e-281	up
BLT_RS0116035	282	hypothetical protein	8	4.58043	22	12.2807	-1.42284	0.0110801	0.0137971
BLT_RS0105940	279	hypothetical protein	1232	712.97	806	454.757	0.648746	1.03117e-23	2.39568e-23
BLT_RS21520	911	hypothetical protein	828	146.75	2137	369.262	-1.33129	3.21985e-125	1.67105e-124	down
BLT_RS0116745	240	hypothetical protein	78	52.4745	90	59.031	-0.169855	0.446019	0.475846
BLT_RS0107080	1674	ABC transporter	2883	278.07	1719	161.648	0.782597	3.08081e-73	1.16941e-72
BLT_RS0120445	627	hypothetical protein	218	56.1376	17	4.26806	3.71732	7.26108e-46	2.2219e-45	up
BLT_RS0114310	675	hypothetical protein	82	19.6144	33	7.69589	1.34975	1.82747e-06	2.77467e-06
BLT_RS0108830	1998	transketolase	1299	104.973	958	75.4777	0.475899	6.61778e-15	1.29105e-14
BLT_RS0102125	1329	UDP-N-acetyl-D-glucosamine dehydrogenase	147	17.859	131	15.5165	0.202845	0.241504	0.266198
BLT_RS0107720	906	hypothetical protein	791	140.966	218	37.8771	1.89595	5.5824e-80	2.23355e-79	up
BLT_RS0108775	825	hypothetical protein	1087	212.736	335	63.9204	1.73471	6.8943e-97	3.10408e-96	up
BLT_RS0107280	612	hypothetical protein	63	16.6209	101	25.9788	-0.644336	0.00479174	0.00613479
BLT_RS0113165	768	hypothetical protein	490	103.015	760	155.776	-0.596622	5.03378e-13	9.34208e-13
BLT_RS0114875	771	hypothetical protein	537	112.457	91	18.5796	2.59758	6.41534e-80	2.5641e-79	up
BLT_RS0117285	1284	L-dehydroascorbate transporter large permease subunit	137	17.2274	132	16.1829	0.0902335	0.608028	0.633552
BLT_RS0104820	597	non-canonical purine NTP pyrophosphatase	674	182.285	483	127.357	0.517321	1.3866e-09	2.33452e-09
BLT_RS0116680	1047	acylamide amidohydrolase	189	29.1461	288	43.3007	-0.571087	1.90583e-05	2.78817e-05
BLT_RS0109275	429	6-carboxy-5,6,7,8-tetrahydropterin synthase	238	89.5746	151	55.4075	0.693009	2.91191e-06	4.3929e-06
BLT_RS0104915	477	hypothetical protein	74	25.0483	27	8.91034	1.49116	1.02614e-06	1.56937e-06	up
BLT_RS0103150	1221	cysteine desulfurase	5233	691.99	6508	839.036	-0.27798	2.15317e-25	5.13521e-25
BLT_RS21460	318	hypothetical protein	27	13.7089	9	4.45517	1.62156	0.00170065	0.00224866
BLT_RS0120320	828	stage 0 sporulation protein	2574	501.93	3967	754.19	-0.587441	1.35536e-59	4.70882e-59
BLT_RS0111850	249	hypothetical protein	16	10.3749	13	8.2185	0.336156	0.531494	0.559444
BLT_RS0101585	738	hypothetical protein	576	126.018	734	156.563	-0.313116	9.09014e-05	0.000128936
BLT_RS0120145	1488	MazG family protein	672	72.9174	413	43.6914	0.738915	9.31216e-17	1.89508e-16
BLT_RS21240	1541	hypothetical protein	62	6.49612	214	21.8605	-1.75068	3.27467e-20	7.13356e-20	down
BLT_RS0115065	420	Rrf2 family transcriptional regulator	257	98.7982	79	29.6092	1.73844	2.65947e-24	6.25182e-24	up
BLT_RS0113445	729	hypothetical protein	996	220.596	539	116.388	0.922456	1.91386e-34	5.17262e-34
BLT_RS0101660	390	hypothetical protein	1747	723.258	224	90.4133	2.9999	4.09685e-296	3.86435e-295	up
BLT_RS0101810	983	hypothetical protein	6	0.985514	19	3.04263	-1.62637	0.0091929	0.0115232
BLT_RS0114890	625	3-hexulose-6-phosphate synthase	991	256.011	124	31.2313	3.03514	9.5465e-171	6.02324e-170	up
BLT_RS0116925	438	Fur family transcriptional regulator	6221	2293.25	5706	2050.72	0.161262	1.03441e-09	1.74545e-09
BLT_RS0117575	1716	urease subunit alpha	287	27.0041	1110	101.825	-1.91484	3.79531e-110	1.81722e-109	down
BLT_RS0106120	747	hypothetical protein	503	108.721	369	77.7597	0.483533	8.67822e-07	1.33372e-06
BLT_RS0101275	915	hypothetical protein	2088	368.447	2829	486.699	-0.401575	2.85571e-22	6.44799e-22
BLT_RS0116100	360	hypothetical protein	45	20.1825	42	18.3652	0.136131	0.659974	0.684464
BLT_RS0111910	1197	tryptophan synthase subunit beta	9375	1264.57	7907	1039.84	0.282284	8.91997e-38	2.51909e-37
BLT_RS0116200	558	hypothetical protein	47	13.5997	218	61.4994	-2.177	6.92284e-27	1.68298e-26	down
BLT_RS21920	321	hypothetical protein	43	21.6286	31	15.2022	0.508664	0.13194	0.149313
BLT_RS0116235	684	hypothetical protein	1552	366.354	489	112.539	1.70282	5.15432e-134	2.79414e-133	up
BLT_RS0102290	1437	hypothetical protein	448	50.3369	1258	137.807	-1.45297	8.32919e-85	3.47633e-84	down
BLT_RS0105700	894	ABC transporter permease	11	1.98664	12	2.11297	-0.0889353	0.882535	0.892948
BLT_RS0110530	819	hypothetical protein	284	55.9886	534	102.637	-0.874353	2.73114e-17	5.60336e-17
BLT_RS0119950	492	cystathionine gamma-synthase	128	42.0059	675	215.967	-2.36215	1.0889e-87	4.63703e-87	down
BLT_RS0109640	279	hypothetical protein	373	215.859	290	163.622	0.399718	0.000380571	0.000523857
BLT_RS0103410	627	hypothetical protein	757	194.937	5674	1424.53	-2.86941	0	0	down
BLT_RS21835	598	hypothetical protein	477	128.79	1277	336.154	-1.3841	4.09453e-80	1.64173e-79	down
BLT_RS21940	222	hypothetical protein	28	20.3643	79	56.0174	-1.45983	9.24154e-07	1.41684e-06	down
BLT_RS21130	228	hypothetical protein	75	53.1119	137	94.5876	-0.832618	3.97596e-05	5.74103e-05
BLT_RS0103975	717	hypothetical protein	581	130.834	1127	247.431	-0.919282	1.29547e-37	3.64489e-37
BLT_RS0107970	2037	hypothetical protein	907	71.8921	2565	198.219	-1.46319	1.13835e-172	7.23065e-172	down
BLT_RS0116700	873	hypothetical protein	151	27.9272	144	25.9655	0.105075	0.531699	0.559269
BLT_RS0110845	423	hypothetical protein	7	2.67192	4	1.48857	0.84395	0.341322	0.3699
BLT_RS0107670	933	16S rRNA (cytosine(1402)-N(4))-methyltransferase	657	113.697	603	101.738	0.160331	0.0486455	0.0574459
BLT_RS0109300	765	hypothetical protein	1149	242.507	437	89.9226	1.43127	7.8233e-78	3.06833e-77	up
BLT_RS0105825	1041	TRAP ABC transporter	4769	739.676	5111	772.865	-0.0633233	0.0291315	0.035161
BLT_RS0114825	231	hypothetical protein	748	522.823	239	162.868	1.68262	1.64685e-64	5.90642e-64	up
BLT_RS0107305	300	hypothetical protein	2177	1171.66	7024	3685.63	-1.65336	0	0	down
BLT_RS0109840	1164	hypothetical protein	682	94.6012	65	8.79041	3.42786	2.79354e-131	1.50357e-130	up
BLT_RS0101055	198	hypothetical protein	42	34.2491	79	62.8074	-0.874868	0.00113571	0.00151951
BLT_RS0104880	585	isopropylmalate isomerase	10113	2791.19	2770	745.371	1.90485	0	0	up
BLT_RS0118695	324	hypothetical protein	307	152.988	13	6.31607	4.59825	9.16602e-72	3.4241e-71	up
BLT_RS0105395	876	rod shape-determining protein MreC	911	167.911	801	143.939	0.222244	0.00145244	0.00192757
BLT_RS0106000	795	hypothetical protein	463	94.0327	695	137.615	-0.549405	1.41711e-10	2.45828e-10
BLT_RS0112530	1113	tRNA (5-methylaminomethyl-2-thiouridylate)-methyltransferase	1085	157.398	247	34.9342	2.17171	1.36096e-129	7.2221e-129	up
BLT_RS0101085	576	hypothetical protein	393	110.163	287	78.4347	0.490074	1.07158e-05	1.58118e-05
BLT_RS0106420	207	hypothetical protein	136	106.08	111	84.4114	0.329643	0.0732964	0.0850392
BLT_RS0103810	915	hypothetical protein	52	9.17587	104	17.8921	-0.963404	5.13335e-05	7.37553e-05
BLT_RS0108440	312	50S ribosomal protein L7ae	145	75.0375	40	20.1815	1.89458	5.31788e-16	1.06442e-15	up
BLT_RS22155	199	hypothetical protein	18	14.6044	7	5.53724	1.39917	0.0215798	0.0263072
BLT_RS21730	1917	hypothetical protein	217	18.2769	176	14.4524	0.338715	0.0202905	0.0247674
BLT_RS0102785	486	acetyltransferase	292	97.0089	357	115.633	-0.25336	0.0256503	0.0311185
BLT_RS0100080	1428	aldehyde dehydrogenase	119	13.455	46	5.07082	1.40785	2.92801e-09	4.89471e-09
BLT_RS0115375	843	hypothetical protein	371	71.0577	593	110.733	-0.640017	1.08859e-11	1.95212e-11
BLT_RS0106530	1026	spore photoproduct lyase	996	156.739	1481	227.225	-0.535758	5.55998e-20	1.20562e-19
BLT_RS0103960	1149	hypothetical protein	900	126.47	1544	211.532	-0.74208	8.52783e-36	2.33494e-35
BLT_RS0105270	333	hypothetical protein	19	9.21243	33	15.5998	-0.759871	0.0623581	0.0729315
BLT_RS0109880	477	hypothetical protein	1228	415.667	143	47.1918	3.13882	1.01534e-217	7.57087e-217	up
BLT_RS0100315	1500	malate:quinone oxidoreductase	1037	111.623	440	46.1753	1.27344	3.45752e-59	1.19352e-58	up
BLT_RS0112925	189	hypothetical protein	11	9.39715	7	5.83022	0.688672	0.317351	0.34556
BLT_RS0103750	810	hypothetical protein	1991	396.873	2191	425.8	-0.101501	0.0229637	0.027931
BLT_RS0117500	2424	molybdopterin-binding protein	16674	1110.64	1378	89.4881	3.63355	0	0	up
BLT_RS22425	777	hypothetical protein	500	103.9	610	123.583	-0.250286	0.00393798	0.00507792
BLT_RS0120305	282	hypothetical protein	42	24.0472	106	59.1705	-1.29901	1.98298e-07	3.11871e-07	down
BLT_RS0107040	1197	hypothetical protein	595	80.2579	197	25.9072	1.63129	1.57651e-49	4.96508e-49	up
BLT_RS0109705	1269	dihydrolipoamide succinyltransferase	10722	1364.2	11250	1395.53	-0.0327554	0.0921767	0.105709
BLT_RS0108025	996	phosphate acyltransferase	433	70.193	113	17.8594	1.97464	5.55347e-47	1.7203e-46	up
BLT_RS0104120	1299	UDP-N-acetylmuramate--alanine ligase	6936	862.115	32793	3973.93	-2.20462	0	0	down
BLT_RS0110040	1542	aminobenzoyl-glutamate transporter	327	34.2396	166	16.9462	1.0147	3.15743e-14	6.05334e-14	up
BLT_RS0119140	753	hypothetical protein	1006	215.709	1914	400.125	-0.891365	1.44437e-59	5.01345e-59
BLT_RS0117820	759	ABC transporter permease	2895	615.846	110	22.8139	4.75458	0	0	up
BLT_RS0106205	1224	hypothetical protein	253	33.3737	410	52.7292	-0.659891	6.44423e-09	1.06781e-08
BLT_RS0100845	828	spermidine synthase	142	27.69	135	25.6656	0.109527	0.527584	0.556026
BLT_RS0100860	1671	arginyl-tRNA synthetase	525	50.728	282	26.5657	0.933218	2.89159e-19	6.17079e-19
BLT_RS0102840	1191	hypothetical protein	300	40.67	90	11.8954	1.77356	7.70512e-29	1.93939e-28	up
BLT_RS0112895	396	hypothetical protein	99	40.365	24	9.54036	2.08099	1.0689e-12	1.96347e-12	up
BLT_RS0115585	1353	hypothetical protein	2012	240.102	853	99.243	1.27461	3.09387e-113	1.50234e-112	up
BLT_RS0120315	345	DNA replication initiation control protein YabA	1086	508.248	2716	1239.25	-1.28586	2.00042e-150	1.16296e-149	down
BLT_RS0109075	819	NAD synthetase	640	126.171	314	60.3524	1.0639	2.41334e-28	6.01421e-28	up
BLT_RS0100705	590	N-acetyltransferase	160	43.7858	166	44.2899	-0.0165158	0.917689	0.924057
BLT_RS0106605	930	stage III sporulation protein AA	446	77.4314	227	38.423	1.01095	9.65025e-19	2.03524e-18	up
BLT_RS0109845	345	hypothetical protein	141	65.988	13	5.93161	3.47571	7.39503e-29	1.86382e-28	up
BLT_RS0112785	609	hypothetical protein	44	11.6654	8	2.06786	2.49603	1.16286e-07	1.84969e-07
BLT_RS0105045	771	hypothetical protein	118	24.7111	276	56.3512	-1.18929	4.83937e-15	9.49009e-15	down
BLT_RS0117745	1323	multidrug transporter MatE	1712	208.934	4338	516.153	-1.30475	1.76344e-244	1.43085e-243	down
BLT_RS0103520	423	hypothetical protein	132	50.3847	857	318.925	-2.66216	1.45382e-126	7.5973e-126	down
BLT_RS0120180	951	ribose-phosphate pyrophosphokinase	463	78.6078	581	96.171	-0.29093	0.00116347	0.001555
BLT_RS0103130	369	hypothetical protein	42	18.3776	171	72.9488	-1.98894	2.84453e-19	6.0738e-19	down
BLT_RS0101080	438	ribose 5-phosphate isomerase B	210	77.4123	139	49.9562	0.6319	5.1554e-05	7.40438e-05
BLT_RS0104250	1584	hypothetical protein	1396	142.297	1069	106.236	0.421633	5.05267e-13	9.37254e-13
BLT_RS0108820	240	hypothetical protein	1331	895.43	4752	3116.84	-1.79943	0	0	down
BLT_RS0101190	959	hypothetical protein	132	22.2239	150	24.6219	-0.147829	0.390051	0.419875
BLT_RS0109485	1017	ferredoxin--NADP reductase	798	126.691	1560	241.464	-0.93049	2.05179e-52	6.64499e-52
BLT_RS0103935	969	radical SAM protein	644	107.307	705	114.529	-0.093967	0.231842	0.255922
BLT_RS0102965	756	triosephosphate isomerase	507	108.281	502	104.528	0.0508939	0.575258	0.602067
BLT_RS21385	1407	diguanylate cyclase	3366	386.265	11884	1329.59	-1.78332	0	0	down
BLT_RS0112615	828	purine nucleoside phosphorylase	541	105.495	524	99.6207	0.0826573	0.349846	0.378323
BLT_RS0115205	219	hypothetical protein	422	311.124	234	168.198	0.88733	1.25788e-14	2.43634e-14
BLT_RS0109015	711	hypothetical protein	115	26.1152	599	132.619	-2.34433	2.38382e-77	9.32038e-77	down
BLT_RS0117045	759	short-chain dehydrogenase	144	30.6327	37	7.67377	1.99707	6.11224e-17	1.24657e-16	up
BLT_RS0106275	906	hypothetical protein	193	34.3949	487	84.6154	-1.29873	7.4717e-29	1.88189e-28	down
BLT_RS0110820	555	hypothetical protein	381	110.84	127	36.0213	1.62156	4.48642e-32	1.1755e-31	up
BLT_RS22610	2049	hypothetical protein	689	54.2928	661	50.7818	0.0964493	0.219387	0.242883
BLT_RS0109025	141	acid-soluble spore protein N	593	679.048	422	471.131	0.527385	7.38971e-09	1.22394e-08
BLT_RS0110960	1023	amidohydrolase	1627	256.789	1291	198.655	0.370321	4.81586e-12	8.68974e-12
BLT_RS0109385	1122	hypothetical protein	181	26.0466	66	9.25976	1.49205	2.07735e-14	4.00504e-14	up
BLT_RS0100360	567	hypothetical protein	52	14.8076	97	26.9301	-0.862878	0.000364839	0.00050312
BLT_RS0104670	1722	hypothetical protein	442	41.4433	177	16.1804	1.35689	9.66775e-29	2.43014e-28	up
BLT_RS22460	150	hypothetical protein	6954	7485.29	799	838.502	3.15817	0	0	up
BLT_RS0113245	1119	hypothetical protein	1209	174.446	563	79.2003	1.1392	6.76794e-58	2.30881e-57	up
BLT_RS0108515	1227	aspartate kinase	6288	827.433	4362	559.616	0.564207	3.57552e-89	1.54353e-88
BLT_RS0117545	567	chromate transporter	81	23.0657	95	26.3748	-0.19341	0.374597	0.404162
BLT_RS0106765	801	chemotaxis protein CheY	771	155.413	1213	238.384	-0.617181	5.05082e-21	1.11573e-20
BLT_RS0114140	261	hypothetical protein	671	415.095	981	591.667	-0.511345	9.36714e-13	1.72485e-12
BLT_RS0105805	1182	KamA family radical SAM protein	543	74.1733	1852	246.645	-1.73346	1.75167e-159	1.05576e-158	down
BLT_RS0113575	201	hypothetical protein	16	12.8525	34	26.6276	-1.05087	0.0128617	0.0159262
BLT_RS21770	1335	hypothetical protein	2735	330.781	536	63.2022	2.38783	0	0	up
BLT_RS0111470	447	dihydrodipicolinate synthase	560	202.277	424	149.316	0.437958	2.15017e-06	3.25545e-06
BLT_RS0113345	379	permease	140	59.6422	68	28.2435	1.07842	1.77693e-07	2.80752e-07	up
BLT_RS0112680	534	hypothetical protein	2387	721.732	358	105.534	2.77376	0	0	up
BLT_RS0113600	561	5-formyltetrahydrofolate cyclo-ligase	251	72.2397	584	163.87	-1.18169	8.95354e-30	2.28718e-29	down
BLT_RS0114035	933	hypothetical protein	248	42.9176	324	54.6653	-0.349058	0.00396904	0.00511623
BLT_RS0113545	399	hypothetical protein	249	100.761	363	143.213	-0.507228	1.62589e-05	2.38603e-05
BLT_RS0113020	852	hypothetical protein	92	17.4347	70	12.9332	0.430874	0.0585015	0.0685698
BLT_RS0107440	456	hypothetical protein	751	265.913	1281	442.215	-0.73379	1.95362e-29	4.96365e-29
BLT_RS0112995	1125	hypothetical protein	1281	183.849	472	66.0447	1.47701	1.2284e-90	5.3519e-90	up
BLT_RS0108190	780	transcriptional regulator	1752	362.664	1784	360.038	0.0104827	0.828933	0.843464
BLT_RS0117925	366	hypothetical protein	92	40.5856	86	36.9884	0.133893	0.535946	0.563422
BLT_RS21375	567	hypothetical protein	163	46.4162	42	11.6604	1.99301	6.34374e-19	1.34164e-18	up
BLT_RS0105200	279	nuclease	48	27.7781	64	36.1097	-0.378442	0.167288	0.187182
BLT_RS0114965	564	hypothetical protein	540	154.589	811	226.355	-0.550147	3.99993e-12	7.23824e-12
BLT_RS0110970	1035	hypothetical protein	715	111.54	1130	171.865	-0.623712	4.89987e-20	1.06371e-19
BLT_RS21355	1707	hypothetical protein	568	53.7254	1180	108.817	-1.01823	2.87382e-46	8.82973e-46	down
BLT_RS0116525	1356	hypothetical protein	237	28.2198	829	96.2373	-1.76989	1.57763e-74	6.06767e-74	down
BLT_RS0109115	1218	hypothetical protein	3347	443.684	3211	414.994	0.0964414	0.00678422	0.0086011
BLT_RS0118975	624	hypothetical protein	898	232.358	1373	346.366	-0.575949	5.06751e-21	1.11877e-20
BLT_RS0113160	699	phosphoadenosine phosphosulfate reductase	7386	1706.07	587	132.193	3.68996	0	0	up
BLT_RS22570	3021	hypothetical protein	1640	87.6513	5480	285.548	-1.70388	0	0	down
BLT_RS0104585	576	hypothetical protein	1765	494.752	3246	887.104	-0.842399	8.90348e-91	3.88356e-90
BLT_RS0101915	942	agmatinase	315	53.9914	467	78.0395	-0.531475	3.36279e-07	5.24723e-07
BLT_RS0110400	420	hypothetical protein	1996	767.32	89	33.3572	4.52376	0	0	up
BLT_RS0117020	408	aminotransferase	52	20.5782	26	10.0314	1.0366	0.00206351	0.0027156
BLT_RS22585	1473	hypothetical protein	1195	130.988	1439	153.782	-0.23146	3.97846e-05	5.74244e-05
BLT_RS0112750	915	heat-shock protein HtpX	837	147.696	662	113.89	0.374992	5.30317e-07	8.21381e-07
BLT_RS21890	507	hypothetical protein	1286	409.542	1301	403.941	0.0198652	0.726171	0.747366
BLT_RS0117765	1743	hypothetical protein	198	18.3414	242	21.8558	-0.252911	0.0666388	0.0777453
BLT_RS0105620	816	hypothetical protein	175	34.6268	159	30.673	0.174924	0.268136	0.29452
BLT_RS0113865	1803	DNA primase	2114	189.31	854	74.5608	1.34426	6.6844e-129	3.5273e-128	up
BLT_RS0116540	759	hypothetical protein	325	69.1364	346	71.7601	-0.0537368	0.629566	0.65527
BLT_RS0113635	2082	hypothetical protein	2982	231.255	1899	143.58	0.687636	9.1476e-61	3.19869e-60
BLT_RS22110	2239	preprotein translocase subunit SecD	1227	88.4821	1168	82.1178	0.107691	0.0677756	0.0789495
BLT_RS0110455	1371	hypothetical protein	386	45.4585	171	19.6339	1.2112	1.80196e-21	4.01347e-21	up
BLT_RS0109685	1857	hypothetical protein	265	23.0409	661	56.0323	-1.28206	7.93604e-38	2.24458e-37	down
BLT_RS0102550	1182	hypothetical protein	334	45.6241	251	33.4276	0.448756	0.000181938	0.000255186
BLT_RS0114260	789	hypothetical protein	634	129.741	1556	310.443	-1.25869	3.21703e-84	1.3353e-83	down
BLT_RS0117980	972	hypothetical protein	1970	327.239	1567	253.777	0.366786	4.81752e-14	9.18469e-14
BLT_RS0103475	495	AsnC family transcriptional regulator	591	192.773	236	75.0508	1.36097	5.00673e-38	1.42354e-37	up
BLT_RS0114340	1224	hypothetical protein	219	28.8887	12	1.54329	4.22642	9.05661e-50	2.85469e-49	up
BLT_RS0106760	1314	SpoIVB peptidase	745	91.5432	280	33.5437	1.44841	5.36047e-52	1.73012e-51	up
BLT_RS0109885	879	hypothetical protein	697	128.029	109	19.5203	2.71343	4.80484e-108	2.27747e-107	up
BLT_RS0104755	756	succinate dehydrogenase	1631	348.335	2131	443.721	-0.349178	1.45806e-13	2.75339e-13
BLT_RS0103730	204	hypothetical protein	32	25.3271	15	11.5747	1.1297	0.00954711	0.0119592
BLT_RS0120070	2028	cell division protein FtsH	10870	865.419	4174	323.991	1.41744	0	0	up
BLT_RS0118560	825	membrane protein	167	32.6834	127	24.2325	0.431615	0.0106783	0.01331
BLT_RS0107430	270	hypothetical protein	652	389.896	355	206.973	0.913648	8.96645e-23	2.04537e-22
BLT_RS0109745	1590	heme ABC transporter ATP-binding protein	1251	127.036	1091	108.013	0.234026	8.81605e-05	0.00012519
BLT_RS0108295	270	flagellar biosynthesis protein FliQ	160	95.68	72	41.9776	1.1886	1.58243e-09	2.66184e-09	up
BLT_RS0108195	399	hypothetical protein	202	81.7417	384	151.498	-0.890155	3.29996e-13	6.1729e-13
BLT_RS0112455	597	SMC-Scp complex subunit ScpB	273	73.8335	312	82.2676	-0.15605	0.191311	0.212674
BLT_RS0104910	582	GTP-binding protein	1069	296.565	406	109.812	1.43331	1.07507e-72	4.06031e-72	up
BLT_RS0106445	183	hypothetical protein	181	159.695	283	243.436	-0.608217	7.2921e-06	1.08362e-05
BLT_RS0108145	1161	malate--CoA ligase subunit beta	834	115.984	633	85.8263	0.434437	9.45963e-09	1.55993e-08
BLT_RS22500	270	hypothetical protein	24	14.352	12	6.99626	1.0366	0.036342	0.0434468
BLT_RS0100465	324	general stress protein	705	351.325	457	222.034	0.662025	1.0652e-14	2.06527e-14
BLT_RS0112430	204	hypothetical protein	1091	863.495	1115	860.386	0.00520293	0.932499	0.936969
BLT_RS0102435	270	histidine kinase	11	6.578	8	4.66418	0.496027	0.456481	0.486114
BLT_RS0108555	222	hypothetical protein	36	26.1827	50	35.454	-0.437336	0.16264	0.182251
BLT_RS0101185	1101	NAD(P)H-quinone oxidoreductase subunit H	159	23.3171	125	17.8719	0.383694	0.0255469	0.031003
BLT_RS0100875	786	hypothetical protein	138	28.3479	231	46.2635	-0.706629	3.69119e-06	5.54634e-06
BLT_RS0120995	762	ATPase AAA	272	57.634	233	48.1337	0.259872	0.0432743	0.0513924
BLT_RS0111200	1110	hypothetical protein	6532	950.141	2073	293.985	1.6924	0	0	up
BLT_RS0101730	1122	hypothetical protein	63	9.06594	19	2.66569	1.76595	3.55576e-07	5.54375e-07
BLT_RS0107070	303	ATP synthase subunit B	186	99.1141	149	77.4092	0.356586	0.0241248	0.0292867
BLT_RS0110260	1002	hypothetical protein	273	43.9906	523	82.1642	-0.901314	8.86274e-18	1.84238e-17
BLT_RS0117935	4413	hypothetical protein	744	27.221	362	12.9129	1.07591	2.99578e-33	7.97115e-33	up
BLT_RS0118100	948	2-hydroxyhepta-2,4-diene-1,7-dioate isomerase	208	35.4258	32	5.31362	2.73704	8.52803e-34	2.2885e-33	up
BLT_RS0111165	795	ABC transporter ATP-binding protein	1895	384.864	1626	321.96	0.257466	1.23663e-07	1.96454e-07
BLT_RS0111600	1446	hypothetical protein	3909	436.478	2183	237.648	0.877083	1.76562e-119	8.88222e-119
BLT_RS0111955	444	nucleoside diphosphate kinase	317	115.277	353	125.153	-0.11859	0.287713	0.314923
BLT_RS0102795	999	C4-dicarboxylate ABC transporter substrate-binding protein	645	104.246	133	20.9573	2.31447	5.73969e-84	2.37194e-83	up
BLT_RS0110690	996	alcohol dehydrogenase	132	21.3983	134	21.1784	0.0149005	0.932876	0.937098
BLT_RS21950	271	permease	25	14.8948	32	18.5879	-0.319548	0.404852	0.434692
BLT_RS0108210	1581	hypothetical protein	696	71.0792	839	83.537	-0.232988	0.00159377	0.0021129
BLT_RS0114165	768	hypothetical protein	722	151.789	786	161.105	-0.0859349	0.24762	0.27278
BLT_RS0105140	369	hypothetical protein	129	56.4454	81	34.5547	0.707973	0.000450706	0.000618369
BLT_RS0105580	1194	ornithine--oxo-acid aminotransferase	719	97.2276	2037	268.556	-1.46579	6.75652e-138	3.74337e-137	down
BLT_RS0112385	1164	hypothetical protein	287	39.8102	261	35.2969	0.173596	0.159221	0.178633
BLT_RS0104730	1239	hypothetical protein	599	78.0586	695	88.3003	-0.177861	0.0267912	0.0324504
BLT_RS0102450	708	chemotaxis protein CheY	218	49.7151	463	102.943	-1.05009	4.54405e-20	9.87597e-20	down
BLT_RS0108860	1529	hypothetical protein	625	65.999	446	45.9173	0.523408	3.74482e-09	6.24081e-09
BLT_RS0102175	195	hypothetical protein	19	15.732	26	20.9888	-0.415917	0.336504	0.365151
BLT_RS0120325	987	hypothetical protein	1114	182.236	2970	473.683	-1.37812	1.4763e-182	9.68708e-182	down
BLT_RS0101100	2262	hypothetical protein	1004	71.6648	4760	331.255	-2.20861	0	0	down
BLT_RS21310	186	hypothetical protein	56	48.6116	96	81.2469	-0.741012	0.00187041	0.00246923
BLT_RS0112380	597	spore maturation protein	194	52.4678	279	73.5662	-0.487613	0.000266824	0.000371075
BLT_RS0105115	258	hypothetical protein	266	166.467	213	129.96	0.357168	0.00691315	0.00875573
BLT_RS22660	840	hypothetical protein	814	156.462	133	24.9242	2.6502	9.16533e-123	4.6921e-122	up
BLT_RS0111040	1440	GntR family transcriptional regulator	538	60.3233	1027	112.268	-0.896163	4.72027e-33	1.25331e-32
BLT_RS0120160	3546	transcription-repair coupling factor	1321	60.1491	1260	55.9346	0.104802	0.0649972	0.0759005
BLT_RS0102560	1080	UDP-2,4-diacetamido-2,4, 6-trideoxy-beta-L-altropyranose hydrolase	206	30.797	74	10.7859	1.51364	1.6675e-16	3.37345e-16	up
BLT_RS0112670	828	UDP-diphosphatase	946	184.47	370	70.3429	1.39091	9.20427e-62	3.24255e-61	up
BLT_RS0102585	168	carbon storage regulator	424	407.494	68	63.716	2.67705	1.52121e-65	5.48712e-65	up
BLT_RS0115625	1530	carboxylase	669	70.5992	325	33.438	1.07816	3.64949e-30	9.3734e-30	up
BLT_RS0100480	678	hypothetical protein	67	15.9555	75	17.4133	-0.126134	0.602694	0.628167
BLT_RS0115270	1284	GTPase CgtA	713	89.6581	822	100.776	-0.168641	0.0221832	0.0270165
BLT_RS22135	537	hypothetical protein	155	46.6039	92	26.9688	0.789158	2.36893e-05	3.44829e-05
BLT_RS0104905	2325	peptidase	4063	282.156	939	63.5757	2.14994	0	0	up
BLT_RS0104150	1002	catabolite control protein A	424	68.3224	466	73.2094	-0.0996701	0.303	0.330697
BLT_RS0110940	1632	hypothetical protein	1777	175.805	2232	215.289	-0.292298	1.60899e-10	2.78729e-10
BLT_RS0114425	252	hypothetical protein	149	95.4665	2	1.24933	6.25576	3.55259e-37	9.91414e-37	up
BLT_RS0101255	234	hypothetical protein	153	105.57	134	90.1442	0.227894	0.181339	0.202185
BLT_RS0103485	783	hypothetical protein	481	99.1855	234	47.0438	1.07612	4.39622e-22	9.90856e-22	up
BLT_RS0107660	1617	hypothetical protein	227	22.6663	366	35.6303	-0.652556	5.6226e-08	9.0311e-08
BLT_RS0101770	357	hypothetical protein	651	294.427	29	12.7873	4.52513	5.06945e-149	2.92462e-148	up
BLT_RS0105315	813	hypothetical protein	62	12.3131	21	4.06609	1.59847	2.52146e-06	3.80996e-06
BLT_RS0117625	1362	MATE family efflux transporter	101	11.9732	455	52.5876	-2.13492	5.49949e-53	1.78876e-52	down
BLT_RS0109340	1092	hypothetical protein	107	15.8207	154	22.1997	-0.488724	0.00664607	0.00843162
BLT_RS0116265	471	hypothetical protein	140	47.9924	55	18.3819	1.38452	2.05726e-10	3.55323e-10	up
BLT_RS0104410	663	hypothetical protein	795	193.606	375	89.0362	1.12066	1.03437e-37	2.91681e-37	up
BLT_RS0104030	777	hypothetical protein	1150	238.969	592	119.936	0.99456	1.47982e-44	4.46669e-44
BLT_RS0119285	618	flavoprotein	15279	3991.83	2557	651.315	2.61562	0	0	up
BLT_RS0105545	879	phosphate-binding protein	1215	223.179	1710	306.236	-0.456444	1.98083e-17	4.07285e-17
BLT_RS0120955	591	glutamine amidotransferase	964	263.363	1967	523.921	-0.992296	7.82907e-73	2.95983e-72
BLT_RS0110240	237	hypothetical protein	216	147.153	230	152.767	-0.054007	0.692686	0.71544
BLT_RS22325	1926	hypothetical protein	421	35.2932	66	5.39432	2.70988	6.38947e-66	2.3158e-65	up
BLT_RS0112070	1155	30S ribosomal protein S1	6678	933.533	2063	281.168	1.73127	0	0	up
BLT_RS0111565	1488	glutamate synthase subunit beta	8113	880.326	8566	906.2	-0.0417906	0.0612783	0.0716908
BLT_RS0104475	720	two-component system response regulator	68	15.249	45	9.8385	0.632205	0.0211822	0.0258392
BLT_RS0115915	1692	hypothetical protein	886	84.547	367	34.144	1.30812	6.39586e-53	2.07852e-52	up
BLT_RS0111730	702	hypothetical protein	154	35.42	575	128.938	-1.86404	5.75169e-56	1.92728e-55	down
BLT_RS0107045	918	cupin	468	82.313	226	38.7538	1.08678	7.49808e-22	1.68094e-21	up
BLT_RS0115845	354	hypothetical protein	309	140.935	463	205.886	-0.54681	1.86118e-07	2.93204e-07
BLT_RS0110665	378	hypothetical protein	3393	1449.3	2552	1062.77	0.447529	1.15664e-32	3.05389e-32
BLT_RS0116615	1107	hypothetical protein	4518	658.967	155	22.0411	4.90194	0	0	up
BLT_RS0107030	279	hypothetical protein	107	61.922	15	8.46322	2.87117	5.21823e-19	1.10671e-18	up
BLT_RS0104310	1212	argininosuccinate synthase	4655	620.129	2514	326.521	0.925392	3.67828e-155	2.1821e-154
BLT_RS0112270	384	hypothetical protein	1112	467.561	3213	1317.13	-1.49417	1.52362e-222	1.16842e-221	down
BLT_RS0104200	243	hypothetical protein	489	324.913	891	577.192	-0.828995	1.6285e-25	3.88881e-25
BLT_RS0114095	1218	hypothetical protein	248	32.8753	186	24.0389	0.451633	0.00117767	0.00157286
BLT_RS0116250	186	hypothetical protein	24	20.8336	70	59.2426	-1.50772	2.23107e-06	3.37523e-06	down
BLT_RS0120935	1011	peptide ABC transporter ATP-binding protein	415	66.2769	296	46.0881	0.52411	1.51331e-06	2.30417e-06
BLT_RS0119985	1506	lysyl-tRNA synthetase	1041	111.607	478	49.9634	1.15948	1.74384e-51	5.58532e-51	up
BLT_RS0112115	990	hypothetical protein	220	35.88	145	23.0559	0.638046	2.92033e-05	4.23947e-05
BLT_RS0111100	774	hypothetical protein	9446	1970.48	10340	2102.95	-0.0938652	4.70833e-06	7.05221e-06
BLT_RS0108675	261	stage V sporulation protein S	1173	725.642	5228	3153.14	-2.11946	0	0	down
BLT_RS0107140	522	hypothetical protein	99	30.6217	154	46.4407	-0.600834	0.00106611	0.00142995
BLT_RS0115685	990	hypothetical protein	69	11.2533	30	4.77018	1.23823	4.24419e-05	6.1143e-05
BLT_RS0111445	864	hypothetical protein	208	38.87	221	40.265	-0.0508673	0.715052	0.736927
BLT_RS0120360	1506	tripartite tricarboxylate transporter TctA	2181	233.828	1301	135.988	0.781964	9.01137e-56	3.01417e-55
BLT_RS0100225	1452	hypothetical protein	142	15.7902	569	61.6871	-1.96594	2.36652e-59	8.19163e-59	down
BLT_RS0117685	1008	rod shape-determining protein MreB	378	60.5475	1383	215.978	-1.83475	3.36981e-129	1.78321e-128	down
BLT_RS0105295	2591	phage tail tape measure protein	153	9.53431	171	10.3891	-0.123869	0.440008	0.469898
BLT_RS0103510	1164	NADH-dependent butanol dehydrogenase A	691	95.8496	1203	162.69	-0.763283	1.3505e-29	3.44285e-29
BLT_RS0105960	1167	hypothetical protein	1845	255.265	387	52.2022	2.28981	1.67192e-233	1.32803e-232	up
BLT_RS0111270	422	CDP-diacylglycerol--serine O-phosphatidyltransferase	37	14.1564	31	11.5637	0.291853	0.405128	0.434864
BLT_RS0114270	273	transcriptional regulator	1181	698.477	3268	1884.38	-1.4318	1.7162e-212	1.25005e-211	down
BLT_RS0116730	375	hypothetical protein	102	43.9171	171	71.7817	-0.708832	6.5305e-05	9.34025e-05
BLT_RS0119545	1302	guanine permease	167	20.7095	439	53.0765	-1.35778	6.55844e-28	1.62156e-27	down
BLT_RS0104850	522	acetolactate synthase	9626	2977.42	1115	336.243	3.14649	0	0	up
BLT_RS0106390	243	membrane protein insertion efficiency factor YidD	54	35.88	109	70.6104	-0.976701	2.75025e-05	3.99719e-05
BLT_RS0111455	570	hypothetical protein	42	11.8971	160	44.1869	-1.89302	4.42971e-17	9.03909e-17	down
BLT_RS0109345	1284	hypothetical protein	218	27.413	108	13.2406	1.04989	1.83526e-10	3.1749e-10	up
BLT_RS0104040	333	hypothetical protein	4127	2001.04	5151	2434.98	-0.283164	4.19117e-21	9.26922e-21
BLT_RS0116710	843	energy-coupling factor ABC transporter ATP-binding protein	106	20.3022	54	10.0836	1.00963	1.67406e-05	2.45385e-05	up
BLT_RS0114215	231	hypothetical protein	17	11.8823	128	87.2261	-2.87594	6.10578e-22	1.37044e-21	down
BLT_RS0111195	984	pyruvate dehydrogenase	5297	869.16	1971	315.312	1.46284	0	0	up
BLT_RS0101635	270	hypothetical protein	39	23.322	188	109.608	-2.23259	4.22842e-24	9.90306e-24	down
BLT_RS0103745	1020	hypothetical protein	2585	409.19	5292	816.711	-0.997053	3.14846e-194	2.17169e-193
BLT_RS0108710	1917	hypothetical protein	897	75.5502	341	28.0015	1.43193	3.29213e-61	1.15546e-60	up
BLT_RS0100925	1143	acyl-CoA dehydrogenase	7655	1081.34	1372	188.954	2.51672	0	0	up
BLT_RS0101375	297	hypothetical protein	2359	1282.44	4066	2155.06	-0.748839	8.79884e-93	3.89648e-92
BLT_RS0103695	852	hypothetical protein	3687	698.713	726	134.136	2.381	0	0	up
BLT_RS0109505	567	hypothetical protein	18	5.12572	5	1.38815	1.88459	0.00443895	0.00569858
BLT_RS0116405	945	hypothetical protein	46	7.85943	10	1.66578	2.23823	3.76066e-07	5.85353e-07
BLT_RS0107160	954	hypothetical protein	257	43.496	9041	1491.82	-5.10005	0	0	down
BLT_RS0107035	426	hypothetical protein	277	104.987	193	71.3175	0.557881	3.21019e-05	4.64953e-05
BLT_RS0117215	732	hypothetical protein	171	37.7181	84	18.0641	1.06213	1.20232e-08	1.97405e-08	up
BLT_RS0115055	1101	tRNA (5-methylaminomethyl-2-thiouridylate)-methyltransferase	1475	216.307	589	84.2125	1.36097	3.25416e-92	1.42933e-91	up
BLT_RS0111330	2295	ATP-dependent helicase	261	18.3621	190	13.0323	0.494646	0.000296792	0.000412145
BLT_RS0104185	2904	hypothetical protein	7347	408.487	8682	470.622	-0.204277	3.4356e-19	7.30283e-19
BLT_RS0104890	1293	trigger factor	4547	567.795	3674	447.29	0.344159	3.91853e-27	9.56313e-27
BLT_RS21795	634	hypothetical protein	87	22.1562	86	21.353	0.0532743	0.808115	0.824505
BLT_RS21960	342	hypothetical protein	272	128.413	431	198.381	-0.627486	1.26137e-08	2.0683e-08
BLT_RS0106510	384	transcriptional regulator	408	171.551	179	73.3788	1.22521	5.48162e-23	1.25804e-22	up
BLT_RS0101040	282	hypothetical protein	26	14.8864	57	31.8181	-1.09585	0.000860122	0.00116067
BLT_RS0119760	198	hypothetical protein	113	92.1464	29	23.0559	1.99879	1.23905e-13	2.34449e-13	up
BLT_RS0115195	1140	queuine tRNA-ribosyltransferase	851	120.529	346	47.7771	1.33498	1.82935e-52	5.92966e-52	up
BLT_RS0100445	1992	hypothetical protein	1458	118.177	1172	92.6162	0.351614	4.61244e-10	7.87454e-10
BLT_RS0100570	733	DNA topoisomerase III	433	95.3782	1468	315.261	-1.72482	5.88096e-126	3.06476e-125	down
BLT_RS21780	2022	hypothetical protein	1013	80.8897	411	31.997	1.33802	2.55942e-62	9.08438e-62	up
BLT_RS0111225	315	hypothetical protein	111	56.8954	194	96.9482	-0.768901	4.98392e-06	7.45317e-06
BLT_RS0112075	588	hypothetical protein	1821	500.032	625	167.321	1.5794	4.39624e-141	2.46464e-140	up
BLT_RS0109360	921	hypothetical protein	147	25.7705	157	26.8342	-0.0583529	0.724439	0.745786
BLT_RS0108725	240	RNA chaperone Hfq	525	353.194	653	428.303	-0.27817	0.000969135	0.00130358
BLT_RS0103365	1215	NADH dehydrogenase	1563	207.705	3243	420.165	-1.01642	1.39114e-123	7.1509e-123	down
BLT_RS0114955	693	5'-methylthioadenosine/S-adenosylhomocysteine nucleosidase	115	26.7935	401	91.0877	-1.76537	7.59603e-37	2.10734e-36	down
BLT_RS0120255	879	peptidase	1677	308.042	3253	582.564	-0.919293	3.55565e-105	1.66859e-104
BLT_RS0120605	204	50S ribosomal protein L29	1748	1383.49	484	373.477	1.88922	1.45364e-173	9.28016e-173	up
BLT_RS0111110	306	ethyl tert-butyl ether degradation protein EthD	3884	2049.38	4830	2484.7	-0.277884	3.0461e-19	6.49318e-19
BLT_RS0117265	1347	hypothetical protein	234	28.0487	135	15.7767	0.830145	5.80538e-08	9.31676e-08
BLT_RS0118295	1047	hypothetical protein	1157	178.423	861	129.451	0.462899	7.578e-13	1.39882e-12
BLT_RS0106750	450	arginine repressor	759	272.329	290	101.446	1.42464	1.09946e-51	3.53345e-51	up
BLT_RS0106175	564	acetyltransferase	2051	587.153	2656	741.306	-0.336332	1.64253e-15	3.25829e-15
BLT_RS0104320	438	hypothetical protein	2603	959.544	4241	1524.2	-0.667634	2.10627e-79	8.37403e-79
BLT_RS0120095	924	hypothetical protein	354	61.8581	387	65.9307	-0.0919887	0.385685	0.415531
BLT_RS0104560	1932	threonyl-tRNA synthetase	819	68.445	1201	97.8554	-0.515705	1.7058e-15	3.38203e-15
BLT_RS22615	2334	hypothetical protein	158	10.93	42	2.83268	1.94806	6.80991e-18	1.41876e-17
BLT_RS0116220	903	hypothetical protein	293	52.3896	465	81.0614	-0.629735	3.02339e-09	5.05193e-09
BLT_RS0109000	2724	aconitate hydratase	10932	647.974	7400	427.635	0.599556	3.5063e-171	2.21596e-170
BLT_RS0117320	783	hypothetical protein	396	81.658	974	195.815	-1.26183	1.32012e-53	4.32736e-53	down
BLT_RS0102305	849	hypothetical protein	563	107.069	567	105.129	0.0263817	0.758555	0.776038
BLT_RS0101980	1101	hypothetical protein	427	62.6189	297	42.4637	0.560369	2.1794e-07	3.41908e-07
BLT_RS0104555	855	hypothetical protein	1377	260.036	1034	190.372	0.449888	2.57769e-14	4.95446e-14
BLT_RS0119325	312	dihydroorotate dehydrogenase	87	45.0225	51	25.7315	0.807114	0.00124323	0.00165808
BLT_RS0100340	1677	hypothetical protein	486	46.7916	78	7.32167	2.67601	7.94036e-75	3.05704e-74	up
BLT_RS0116425	1328	hypothetical protein	184	22.371	38	4.50437	2.31223	3.62894e-25	8.61673e-25	up
BLT_RS0101850	576	polysaccharide deacetylase	3823	1071.63	646	176.546	2.60169	0	0	up
BLT_RS0118615	387	amino acid-binding protein	525	219.035	257	104.537	1.06714	1.18287e-23	2.74137e-23	up
BLT_RS0113935	2145	membrane protein	1225	92.2091	454	33.3179	1.46861	4.8517e-86	2.04074e-85	up
BLT_RS0102780	648	pyrophosphatase	284	70.7633	255	61.9461	0.191989	0.122647	0.139214
BLT_RS0101495	303	hypothetical protein	133	70.8719	57	29.6129	1.25899	8.5033e-09	1.40468e-08	up
BLT_RS0120130	594	hypothetical protein	281	76.3809	167	44.2567	0.787318	1.3477e-08	2.20793e-08
BLT_RS0106735	222	hypothetical protein	222	161.46	581	411.976	-1.35138	3.82235e-36	1.05038e-35	down
BLT_RS0121000	1227	hypothetical protein	496	65.2683	1162	149.077	-1.1916	2.8216e-58	9.65176e-58	down
BLT_RS0102410	1020	peptide ABC transporter substrate-binding protein	6300	997.253	311	47.9964	4.37696	0	0	up
BLT_RS0111615	1143	PBS lyase	2421	341.99	1039	143.093	1.257	5.55224e-133	3.00123e-132	up
BLT_RS0103630	1443	hypothetical protein	932	104.283	521	56.8356	0.875642	9.28668e-30	2.37068e-29
BLT_RS0102830	1416	FAD-binding protein	987	112.543	281	31.2386	1.84908	4.35698e-96	1.95468e-95	up
BLT_RS0109380	576	hypothetical protein	51	14.2959	79	21.59	-0.59476	0.0202016	0.0246829
BLT_RS0106810	993	2-oxoisovalerate dehydrogenase subunit alpha	230	37.3976	378	59.9227	-0.680157	1.03622e-08	1.70727e-08
BLT_RS0120640	624	50S ribosomal protein L4	4207	1088.56	1282	323.409	1.75099	0	0	up
BLT_RS0115400	693	ecsC	326	75.9538	285	64.7382	0.230506	0.048543	0.0573427
BLT_RS0117680	402	hypothetical protein	198	79.5251	801	313.657	-1.97971	1.52434e-83	6.26508e-83	down
BLT_RS0101300	288	stage III sporulation protein D	815	456.909	247	135.006	1.75888	1.66594e-74	6.40081e-74	up
BLT_RS0106140	555	hypothetical protein	246	71.5661	284	80.5516	-0.170637	0.173894	0.194286
BLT_RS0118540	564	RNA polymerase sigma factor SigW	572	163.75	1994	556.538	-1.76498	7.23809e-176	4.66029e-175	down
BLT_RS0109480	867	hypothetical protein	1132	210.811	2201	399.622	-0.92269	3.3303e-72	1.25027e-71
BLT_RS0114135	618	hypothetical protein	155	40.4956	81	20.6322	0.97287	4.47236e-07	6.93983e-07
BLT_RS0112325	1470	ABC transporter ATP-binding protein	336	36.9052	785	84.0623	-1.18764	9.67551e-40	2.80382e-39	down
BLT_RS0109195	678	hypothetical protein	233	55.487	287	66.6348	-0.264125	0.0373532	0.0445992
BLT_RS0102765	499	hypothetical protein	92	29.7682	136	42.9029	-0.527305	0.00626572	0.00797053
BLT_RS0109065	294	hypothetical protein	312	171.345	440	235.588	-0.459362	1.46366e-05	2.1488e-05
BLT_RS0116610	363	(2Fe-2S) ferredoxin	1312	583.569	29	12.5759	5.53617	0	0	up
BLT_RS0111150	1029	branched-chain amino acid ABC transporter permease	498	78.141	182	27.8423	1.4888	9.60782e-37	2.6596e-36	up
BLT_RS0116630	1029	hypothetical protein	2942	461.628	257	39.3157	3.55355	0	0	up
BLT_RS0118200	921	lipid kinase	210	36.815	212	36.2347	0.0229206	0.870367	0.882293
BLT_RS0100350	2622	hypothetical protein	716	44.0905	653	39.2039	0.169472	0.0298381	0.0359677
BLT_RS0118370	486	N5-carboxyaminoimidazole ribonucleotide mutase	123	40.8633	191	61.8651	-0.598319	0.000282561	0.000392527
BLT_RS0120290	963	hypothetical protein	1151	192.981	864	141.233	0.45038	3.13124e-12	5.67716e-12
BLT_RS0110065	1332	hypothetical protein	251	30.4253	536	63.3446	-1.05795	3.03612e-23	6.99345e-23	down
BLT_RS0100580	684	hypothetical protein	226	53.3479	162	37.2827	0.516924	0.000456891	0.000626627
BLT_RS0103515	1353	glucose-6-phosphate isomerase	374	44.6312	2352	273.645	-2.61618	0	0	down
BLT_RS0106185	396	ArsR family transcriptional regulator	18477	7533.58	9914	3940.96	0.934787	0	0
BLT_RS0114050	753	hypothetical protein	1369	293.544	1842	385.073	-0.391555	2.02704e-14	3.91204e-14
BLT_RS0100345	1116	hypothetical protein	997	144.243	524	73.9121	0.964622	5.06645e-37	1.4118e-36
BLT_RS0102645	198	cold-shock protein	7399	6033.55	14402	11450	-0.924271	0	0
BLT_RS0120085	450	hypothetical protein	107	38.3916	90	31.4832	0.286209	0.164619	0.184305
BLT_RS0120230	195	hypothetical protein	0.5	0.414	0.5	0.403631	0.0365955	1	1
BLT_RS0112290	438	hypothetical protein	40	14.7452	48	17.2511	-0.226439	0.462527	0.491858
BLT_RS0104420	978	acetyl-CoA carboxylase subunit alpha	1703	281.152	727	117.016	1.26465	5.3889e-95	2.40619e-94	up
BLT_RS0116260	204	hypothetical protein	67	53.0285	21	16.2046	1.71037	2.83002e-07	4.42873e-07	up
BLT_RS0112560	294	hypothetical protein	1187	651.881	3941	2110.12	-1.69465	0	0	down
BLT_RS0111210	495	hypothetical protein	2763	901.241	37	11.7664	6.25916	0	0	up
BLT_RS0119790	231	hypothetical protein	770	538.2	153	104.263	2.36792	1.4536e-102	6.73762e-102	up
BLT_RS0112815	582	hypothetical protein	144	39.9489	44	11.9009	1.74709	2.1704e-14	4.18229e-14	up
BLT_RS0111570	4590	glutamate synthase	21139	743.596	11756	403.177	0.883105	0	0
BLT_RS0119030	804	hypothetical protein	205	41.1683	186	36.4171	0.176917	0.2256	0.249323
BLT_RS0108375	720	uridylate kinase	535	119.974	629	137.52	-0.196926	0.0200782	0.02454
BLT_RS0108335	489	hypothetical protein	836	276.034	430	138.423	0.995762	6.37549e-33	1.68924e-32
BLT_RS0100890	989	hypothetical protein	3665	598.333	582	92.6351	2.69132	0	0	up
BLT_RS0111015	771	short-chain dehydrogenase	178	37.2761	63	12.8628	1.53505	9.73063e-15	1.88953e-14	up
BLT_RS0113480	777	ABC transporter permease	383	79.5871	72	14.5868	2.44787	6.29925e-54	2.07936e-53	up
BLT_RS0102170	1152	hypothetical protein	412	57.7444	3536	483.179	-3.06481	0	0	down
BLT_RS0106230	180	hypothetical protein	27	24.219	9	7.8708	1.62156	0.00170065	0.00224866
BLT_RS0102725	225	hypothetical protein	810	581.256	6237	4363.57	-2.90826	0	0	down
BLT_RS0101785	573	hypothetical protein	2178	613.717	5	1.37361	8.80346	0	0	up
BLT_RS0103240	624	hypothetical protein	658	170.258	351	88.5465	0.943212	3.85137e-24	9.04245e-24
BLT_RS0103260	459	hypothetical protein	180	63.3177	123	42.1834	0.585934	0.000459546	0.000630039
BLT_RS0104955	915	hypothetical protein	2162	381.504	3405	585.794	-0.618693	3.14182e-56	1.05652e-55
BLT_RS0112425	438	hypothetical protein	41	15.1138	7	2.51578	2.58679	1.80204e-07	2.84361e-07
BLT_RS0108935	1053	hypothetical protein	724	111.013	346	51.7245	1.10181	1.30681e-33	3.49192e-33	up
BLT_RS0101405	1485	hypothetical protein	2788	303.132	447	47.3838	2.67748	0	0	up
BLT_RS0109230	300	HesB/YadR/YfhF family protein	150	80.73	35	18.3652	2.13613	4.99071e-19	1.05905e-18	up
BLT_RS0101160	369	NADH:ubiquinone oxidoreductase subunit A	1091	477.379	128	54.605	3.12803	4.63435e-193	3.17916e-192	up
BLT_RS0113870	513	hypothetical protein	509	160.201	160	49.0966	1.70619	2.56027e-45	7.77145e-45	up
BLT_RS0106485	831	octanoyltransferase	211	40.9965	520	98.5034	-1.26467	1.60899e-29	4.09629e-29	down
BLT_RS0109530	1461	aldehyde dehydrogenase	1565	172.953	292	31.4616	2.45872	1.54133e-215	1.14477e-214	up
BLT_RS0116660	999	hypothetical protein	70	11.3135	20	3.15147	1.84395	3.22906e-08	5.22886e-08
BLT_RS0102925	948	sporulation regulator WhiA	4278	728.614	5800	963.093	-0.402521	4.15435e-44	1.24995e-43
BLT_RS0107995	363	hypothetical protein	530	235.741	278	120.555	0.967503	1.525e-20	3.33362e-20
BLT_RS0115620	1908	AMP-dependent synthetase	1440	121.857	1205	99.4162	0.293631	1.74985e-07	2.7659e-07
BLT_RS0110810	1290	hypothetical protein	515	64.4589	913	111.411	-0.789447	3.93792e-24	9.23418e-24
BLT_RS0108950	762	Pn transporter membrane channel protein	1255	265.922	225	46.4811	2.51629	8.05336e-178	5.22084e-177	up
BLT_RS0109900	1281	hypothetical protein	619	78.0201	870	106.91	-0.45448	1.59048e-09	2.67419e-09
BLT_RS0112395	564	hypothetical protein	189	54.1063	207	57.775	-0.094649	0.5141	0.542421
BLT_RS0118880	420	arsenate reductase	2004	770.395	373	139.8	2.46223	7.38346e-276	6.41884e-275	up
BLT_RS0102010	474	hypothetical protein	719	244.915	28	9.29883	4.71909	4.11825e-167	2.55562e-166	up
BLT_RS0103190	495	hypothetical protein	462	150.696	1235	392.745	-1.38195	2.31319e-77	9.05361e-77	down
BLT_RS0116955	468	peroxiredoxin	86	29.67	51	17.1543	0.790435	0.00161644	0.00214219
BLT_RS0111995	567	GTP cyclohydrolase I	445	126.719	159	44.1431	1.52137	4.94048e-34	1.32956e-33	up
BLT_RS0106035	939	3-oxoacyl-ACP synthase	6318	1086.37	1042	174.683	2.63671	0	0	up
BLT_RS0106875	1053	hypothetical protein	778	119.293	2461	367.902	-1.62481	6.53996e-193	4.47827e-192	down
BLT_RS21425	453	hypothetical protein	51	18.1776	27	9.38241	0.954133	0.00438756	0.00563453
BLT_RS0117505	606	hypothetical protein	2540	676.747	175	45.4584	3.896	0	0	up
BLT_RS0110375	774	cobalt-precorrin-4 C(11)-methyltransferase	358	74.6805	606	123.248	-0.722763	2.07487e-14	4.00229e-14
BLT_RS0113605	150	50S ribosomal protein L33	875	941.85	976	1024.25	-0.121003	0.071373	0.0828841
BLT_RS0110670	765	3-ketoacyl-ACP reductase	462	97.5092	195	40.1256	1.28101	1.46249e-27	3.59712e-27	up
BLT_RS0113980	993	hypothetical protein	111	18.0484	103	16.3281	0.144511	0.4639	0.49318
BLT_RS0114900	627	cyclase	707	182.061	2367	594.264	-1.70668	6.4463e-199	4.47094e-198	down
BLT_RS0106105	834	hypothetical protein	1184	229.219	2258	426.193	-0.894781	2.18816e-70	8.12592e-70
BLT_RS0114690	246	hypothetical protein	304	199.528	6	3.83941	5.69956	1.82362e-74	6.99951e-74	up
BLT_RS0107585	1230	multidrug transporter	2551	334.865	528	67.5737	2.30905	0	0	up
BLT_RS0105235	1230	phage portal protein	97	12.733	73	9.34257	0.446684	0.0445986	0.0528986
BLT_RS0110430	1359	tetracycline resistance protein TetA	305	36.2364	119	13.784	1.39444	3.94645e-21	8.73823e-21	up
BLT_RS0101640	510	hypothetical protein	342	108.273	814	251.248	-1.21444	1.45932e-42	4.34572e-42	down
BLT_RS0108465	948	hypothetical protein	116	19.7567	117	19.4279	0.0242118	0.898077	0.906486
BLT_RS0115370	1059	hypothetical protein	358	54.5823	444	65.9987	-0.274005	0.00732413	0.0092576
BLT_RS0115780	1062	tartrate dehydrogenase	108	16.4197	37	5.48436	1.58203	7.03692e-10	1.19542e-09
BLT_RS0102155	1230	hypothetical protein	121	15.8835	135	17.2774	-0.121357	0.501281	0.529341
BLT_RS0114185	588	hypothetical protein	293	80.4554	245	65.59	0.294714	0.0180524	0.0221717
BLT_RS0115665	1146	acyl-CoA dehydrogenase	1058	149.062	513	70.4663	1.0809	6.8025e-47	2.10376e-46	up
BLT_RS0104000	366	hypothetical protein	93	41.0267	57	24.5156	0.742864	0.00189051	0.00249314
BLT_RS0102685	981	peptide chain release factor 2	2770	455.907	22123	3549.96	-2.96099	0	0	down
BLT_RS0113720	492	hypothetical protein	9800	3216.07	3969	1269.89	1.3406	0	0	up
BLT_RS0117015	605	quinone oxidoreductase	93	24.8195	71	18.4736	0.426007	0.0597987	0.070025
BLT_RS0115720	483	hypothetical protein	221	73.8772	288	93.8629	-0.345427	0.00716024	0.00905955
BLT_RS0103575	231	hypothetical protein	928	648.636	669	455.893	0.508714	2.56715e-12	4.67238e-12
BLT_RS0117565	303	urease subunit gamma	20	10.6574	85	44.1596	-2.05087	1.08401e-10	1.88825e-10	down
BLT_RS0119360	279	hypothetical protein	846	489.589	723	407.927	0.263258	0.000307615	0.000426545
BLT_RS0110730	1326	hypothetical protein	314	38.2341	162	19.2318	0.991366	2.9291e-13	5.49825e-13
BLT_RS0103525	180	hypothetical protein	58	52.026	392	342.817	-2.72013	3.03066e-60	1.05583e-59	down
BLT_RS0107235	843	hypothetical protein	14	2.68142	19	3.54793	-0.403977	0.423908	0.453731
BLT_RS0109670	774	hypothetical protein	235	49.0221	198	40.2692	0.283756	0.041078	0.0488919
BLT_RS0111770	993	hypothetical protein	2012	327.148	2256	357.634	-0.128541	0.00363036	0.00468767
BLT_RS0107830	1326	uracil transporter	994	121.034	2967	352.227	-1.54109	3.74404e-215	2.76985e-214	down
BLT_RS0118330	1428	amidophosphoribosyltransferase	298	33.694	1017	112.109	-1.73434	1.60932e-88	6.89212e-88	down
BLT_RS0120350	351	hypothetical protein	540	248.4	138	61.89	2.00489	2.77851e-59	9.60889e-59	up
BLT_RS0108630	996	DNA repair exonuclease	87	14.1034	103	16.279	-0.206961	0.323651	0.352115
BLT_RS0109865	1557	hypothetical protein	1632	169.237	580	58.6392	1.52911	6.88573e-121	3.49662e-120	up
BLT_RS0107375	627	hypothetical protein	412	106.095	161	40.421	1.39218	6.5554e-28	1.62187e-27	up
BLT_RS0120215	183	protein sspF	7755	6842.2	4410	3793.47	0.850944	1.89697e-223	1.46365e-222
BLT_RS0100390	1194	hypothetical protein	414	55.9836	53	6.98747	3.00216	9.92203e-72	3.70285e-71	up
BLT_RS0110745	924	hypothetical protein	920	160.761	237	40.3762	1.99334	5.97903e-99	2.70815e-98	up
BLT_RS0111070	519	transferase	2305	717.082	2578	781.923	-0.12489	0.00250339	0.00327166
BLT_RS0117435	714	hypothetical protein	94	21.2566	22	4.85035	2.13175	1.83891e-12	3.35991e-12	up
BLT_RS0101875	732	hypothetical protein	561	123.742	55	11.8277	3.38709	2.66377e-107	1.25787e-106	up
BLT_RS0120190	294	septation protein spoVG	2715	1491.03	1775	950.385	0.649729	2.30913e-50	7.3398e-50
BLT_RS0119135	1038	ribonucleotide-diphosphate reductase subunit beta	1481	230.368	1660	251.744	-0.128016	0.012958	0.0160403
BLT_RS0103865	489	hypothetical protein	331	109.291	278	89.4921	0.288342	0.0138326	0.017106
BLT_RS0108065	999	signal recognition particle-docking protein FtsY	275	44.446	795	125.271	-1.49493	1.52485e-56	5.14142e-56	down
BLT_RS0105085	675	transcriptional regulator	138	33.0096	84	19.5895	0.752803	0.000128817	0.000181761
BLT_RS22575	234	hypothetical protein	31	21.39	32	21.527	-0.00920815	0.979792	0.981353
BLT_RS0105030	762	hypothetical protein	112	23.7317	125	25.8228	-0.121834	0.515964	0.544236
BLT_RS0108700	564	spore coat protein	3050	873.144	1257	350.837	1.31542	4.38487e-179	2.85736e-178	up
BLT_RS0100485	528	hypothetical protein	602	184.089	1437	428.422	-1.21863	3.73113e-74	1.42341e-73	down
BLT_RS22245	165	DNA-binding protein	14	13.6996	33	31.4832	-1.20044	0.00637359	0.00809955
BLT_RS0117620	255	hypothetical protein	130	82.313	178	109.882	-0.41677	0.011751	0.014618
BLT_RS0107120	333	hypothetical protein	125	60.6081	332	156.943	-1.37266	7.76019e-22	1.73867e-21	down
BLT_RS0107735	705	hypothetical protein	343	78.5543	134	29.9202	1.39257	1.61421e-23	3.73644e-23	up
BLT_RS0105815	855	RpiR family transcriptional regulator	37848	7147.3	41721	7681.35	-0.103961	2.19542e-24	5.17062e-24
BLT_RS0109205	816	hypothetical protein	395	78.1577	408	78.708	-0.010121	0.920822	0.926964
BLT_RS21710	546	hypothetical protein	1089	322.033	694	200.085	0.686592	3.29866e-23	7.59356e-23
BLT_RS0105990	900	hypothetical protein	710	127.374	827	144.648	-0.183473	0.0127913	0.0158442
BLT_RS21545	347	acetyl-CoA carboxylase	69	32.1059	31	14.0631	1.19092	7.19398e-05	0.000102697	up
BLT_RS0108200	462	flagellar basal body rod protein FlgC	219	76.5363	376	128.113	-0.743206	6.78615e-10	1.15438e-09
BLT_RS0118620	465	hypothetical protein	245	85.0703	201	68.0443	0.322182	0.0186484	0.0228591
BLT_RS0114070	591	co-chaperone GrpE	1559	425.916	296	78.8411	2.43355	3.25166e-212	2.36388e-211	up
BLT_RS0117030	336	hypothetical protein	180	86.4964	124	58.094	0.574252	0.000580847	0.00079174
BLT_RS0120390	759	hypothetical protein	476	101.258	3515	729.008	-2.8479	0	0	down
BLT_RS0108715	759	hypothetical protein	576	122.531	379	78.6043	0.640467	1.15384e-11	2.06814e-11
BLT_RS0112575	420	hypothetical protein	37	14.2239	15	5.622	1.33916	0.00144298	0.00191635
BLT_RS0117970	2004	C4-dicarboxylate ABC transporter permease	1945	156.706	2271	178.389	-0.186962	2.64768e-05	3.8496e-05
BLT_RS21675	243	hypothetical protein	106	70.4311	45	29.1511	1.27266	2.17061e-07	3.40671e-07	up
BLT_RS0103015	387	hypothetical protein	774	322.92	44	17.8974	4.17335	5.94403e-170	3.71921e-169	up
BLT_RS0117805	543	hypothetical protein	504	149.863	778	225.543	-0.589751	4.69419e-13	8.73332e-13
BLT_RS22755	300	hypothetical protein	0.5	0.2691	2	1.04944	-1.9634	1	1
BLT_RS0102135	1296	hypothetical protein	113	14.0779	74	8.98826	0.647321	0.00241263	0.00315742
BLT_RS0116985	1743	multidrug ABC transporter ATP-binding protein	1022	94.6713	3049	275.365	-1.54035	6.90287e-221	5.21935e-220	down
BLT_RS0109750	1134	alcohol dehydrogenase	393	55.9557	482	66.9087	-0.257908	0.00835559	0.010505
BLT_RS0115360	2151	hypothetical protein	244	18.3153	321	23.4916	-0.359097	0.00323398	0.00419451
BLT_RS0103065	372	hypothetical protein	614	266.496	53	22.4275	3.57077	3.4156e-122	1.74621e-121	up
BLT_RS0119740	1641	molecular chaperone GroEL	1640	161.362	16695	1601.5	-3.31105	0	0	down
BLT_RS0108165	2073	DNA topoisomerase I	1038	80.8468	936	71.0764	0.185822	0.0042399	0.00545605
BLT_RS0114315	855	1,4-dihydroxy-6-naphthoate synthase	349	65.9059	145	26.6963	1.30377	9.25995e-22	2.07346e-21	up
BLT_RS0105840	369	hypothetical protein	348	152.271	557	237.617	-0.641994	4.0326e-11	7.11313e-11
BLT_RS0109990	612	hypothetical protein	1927	508.388	225	57.8735	3.13496	0	0	up
BLT_RS0100065	771	OxaA precursor	804	168.371	545	111.273	0.597535	4.8549e-14	9.25128e-14
BLT_RS0103170	822	hypothetical protein	479	94.0868	833	159.522	-0.761695	6.36701e-21	1.40402e-20
BLT_RS0119845	636	transcriptional regulator	1872	475.241	126	31.1862	3.92968	0	0	up
BLT_RS0104100	801	hypothetical protein	613	123.564	399	78.4132	0.656094	8.56061e-13	1.57711e-12
BLT_RS0114170	861	hypothetical protein	799	149.833	1203	219.944	-0.553774	1.90283e-17	3.91674e-17
BLT_RS21685	1026	hypothetical protein	105	16.5237	19	2.91511	2.50291	2.42389e-16	4.87751e-16
BLT_RS0100815	3312	hypothetical protein	2911	141.911	2527	120.106	0.240685	7.98899e-10	1.35411e-09
BLT_RS0117755	564	pyridine nucleotide-disulfide oxidoreductase	740	211.845	423	118.062	0.843463	1.38204e-22	3.13933e-22
BLT_RS0116465	936	ribose ABC transporter permease	585	100.913	173	29.095	1.79426	1.8722e-55	6.25116e-55	up
BLT_RS0110985	2448	DNA gyrase subunit A	354	23.3484	713	45.8487	-0.973557	1.06025e-26	2.5676e-26
BLT_RS0117750	714	hypothetical protein	1106	250.105	4375	964.558	-1.94734	0	0	down
BLT_RS0119875	1422	hypothetical protein	213	24.1849	161	17.8228	0.440388	0.00330916	0.0042876
BLT_RS22215	1074	hypothetical protein	2087	313.75	65	9.52704	5.04144	0	0	up
BLT_RS0103390	813	hypothetical protein	1733	344.17	2304	446.109	-0.374274	2.36914e-16	4.77244e-16
BLT_RS0102865	1275	histidinol dehydrogenase	507	64.2041	1167	144.082	-1.16615	1.32653e-56	4.47676e-56	down
BLT_RS0109500	1098	hypothetical protein	88	12.9403	22	3.15405	2.0366	3.55418e-11	6.28689e-11
BLT_RS21815	1482	hypothetical protein	103	11.2216	44	4.67362	1.26366	3.73485e-07	5.81576e-07
BLT_RS21720	792	hypothetical protein	1449	295.398	571	113.491	1.38009	1.57405e-92	6.93796e-92	up
BLT_RS0117210	459	hypothetical protein	62	21.8094	12	4.11545	2.40583	7.33585e-10	1.24508e-09	up
BLT_RS0105775	603	hypothetical protein	269	72.0278	202	52.733	0.449846	0.000761338	0.00103217
BLT_RS0108090	417	hypothetical protein	120	46.4633	18	6.79493	2.77356	1.8987e-20	4.14333e-20	up
BLT_RS0120425	633	hypothetical protein	2364	602.988	232	57.6943	3.38563	0	0	up
BLT_RS0106910	1440	hypothetical protein	3905	437.848	5794	633.381	-0.532642	1.55025e-72	5.84324e-72
BLT_RS0117710	456	transposase	743	263.081	557	192.282	0.45228	1.87657e-08	3.06241e-08
BLT_RS0120370	1020	hypothetical protein	1753	277.49	811	125.161	1.14865	3.35955e-84	1.39292e-83	up
BLT_RS0100715	621	N-acetyltransferase	210	54.6	180	45.6278	0.258988	0.0767177	0.0887901
BLT_RS22260	513	hypothetical protein	67	21.0874	48	14.729	0.517722	0.0560074	0.0657077
BLT_RS0105450	237	hypothetical protein	168	114.453	211	140.147	-0.292186	0.0493988	0.0582442
BLT_RS0106715	846	bifunctional 5,10-methylene-tetrahydrofolate dehydrogenase/5,10-methylene-tetrahydrofolate cyclohydrolase	418	79.7758	181	33.6788	1.24411	4.80414e-24	1.12305e-23	up
BLT_RS0109590	822	extradiol ring-cleavage dioxygenase	2705	531.325	2109	403.881	0.395665	2.54766e-21	5.6643e-21
BLT_RS0116280	1557	hypothetical protein	1457	151.09	297	30.0273	2.33106	8.66464e-189	5.8274e-188	up
BLT_RS0114250	363	monovalent cation/H+ antiporter subunit G	308	136.996	644	279.272	-1.02753	2.18063e-26	5.25384e-26	down
BLT_RS0100330	462	hypothetical protein	7	2.44636	4	1.36291	0.84395	0.341322	0.3699
BLT_RS0102770	502	diacylglyceryl transferase	103	33.1283	40	12.5431	1.40117	3.74858e-08	6.05842e-08	up
BLT_RS21505	1011	hypothetical protein	1014	161.939	413	64.3054	1.33244	5.4466e-62	1.92236e-61	up
BLT_RS0119115	2016	PTS glucose transporter subunit IIABC	7539	603.793	59505	4646.35	-2.94397	0	0	down
BLT_RS0107385	627	hypothetical protein	351	90.3867	162	40.6721	1.15207	2.77948e-18	5.81964e-18	up
BLT_RS0110290	1347	hypothetical protein	271	32.4838	186	21.7367	0.579586	2.07458e-05	3.03035e-05
BLT_RS0116590	552	hypothetical protein	1659	485.258	4883	1392.5	-1.52086	0	0	down
BLT_RS0105610	2919	hypothetical protein	1007	55.7007	353	19.0366	1.54892	1.00698e-76	3.91281e-76	up
BLT_RS0118150	1380	RNA methyltransferase	3847	450.099	2793	318.596	0.498514	1.71529e-44	5.17328e-44
BLT_RS0111875	546	hypothetical protein	5946	1758.32	4776	1376.96	0.352712	1.52393e-36	4.20922e-36
BLT_RS0120770	690	hypothetical protein	704	164.736	226	51.5594	1.67585	1.739e-60	6.06401e-60	up
BLT_RS0100620	948	hypothetical protein	498	84.8176	1026	170.368	-1.00622	1.04558e-39	3.0276e-39	down
BLT_RS0100150	1101	GTP-binding protein	949	139.169	1526	218.18	-0.648679	2.71601e-28	6.75512e-28
BLT_RS0116170	243	hypothetical protein	82	54.4845	3	1.94341	4.80919	1.00594e-20	2.20536e-20	up
BLT_RS0101235	1497	hypothetical protein	407	43.8973	727	76.4472	-0.800331	5.71836e-20	1.23925e-19
BLT_RS0110800	189	hypothetical protein	57	48.6943	18	14.992	1.69956	2.42087e-06	3.65943e-06	up
BLT_RS0113560	1560	hypothetical protein	1108	114.678	661	66.7	0.781831	3.58893e-29	9.10015e-29
BLT_RS0110570	297	hypothetical protein	860	467.527	720	381.614	0.292935	5.62641e-05	8.06859e-05
BLT_RS0111935	375	hypothetical protein	203	87.4037	1215	510.028	-2.54481	4.54646e-170	2.85421e-169	down
BLT_RS0118395	1098	chalcone synthase	205	30.1451	86	12.3295	1.28981	3.21987e-13	6.03207e-13	up
BLT_RS0107360	1476	arginine decarboxylase	308	33.6922	234	24.9562	0.433017	0.000505856	0.000691019
BLT_RS0104700	594	TetR family transcriptional regulator	3863	1050.03	648	171.726	2.61225	0	0	up
BLT_RS0114480	378	hypothetical protein	258	110.203	2	0.832889	7.04782	6.61064e-61	2.31587e-60	up
BLT_RS22515	414	transposase	5	1.95	1	0.380232	2.35852	0.0838691	0.0966076
BLT_RS0111090	864	hypothetical protein	6597	1232.81	5175	942.856	0.386847	1.2024e-47	3.74931e-47
BLT_RS0107510	1059	membrane protein	250	38.1162	197	29.2832	0.380328	0.0054842	0.00699997
BLT_RS0108685	867	2-oxoacid ferredoxin oxidoreductase subunit beta	3729	694.446	1948	353.687	0.973391	1.69121e-135	9.221e-135
BLT_RS0101220	1863	hypothetical protein	224	19.4133	338	28.5596	-0.556929	5.94799e-06	8.85626e-06
BLT_RS0107640	633	hypothetical protein	470	119.883	314	78.0863	0.618492	2.8158e-09	4.71341e-09
BLT_RS0105765	798	hypothetical protein	216	43.7035	71	14.0057	1.64174	3.39866e-19	7.22837e-19	up
BLT_RS22250	293	hypothetical protein	42	23.1444	94	50.502	-1.12568	1.22222e-05	1.79923e-05	down
BLT_RS0109210	291	hypothetical protein	3515	1950.28	4544	2458.07	-0.333843	4.28109e-25	1.01461e-24
BLT_RS0106720	1353	exodeoxyribonuclease VII large subunit	582	69.4529	296	34.4384	1.01202	5.19047e-24	1.21186e-23	up
BLT_RS0112330	1062	corrinoid ABC transporter permease	160	24.3254	149	22.0857	0.139355	0.396017	0.425933
BLT_RS0116440	1071	hypothetical protein	252	37.9906	40	5.87921	2.69195	6.64079e-40	1.92885e-39	up
BLT_RS0115955	1272	hypothetical protein	240	30.4642	133	16.4594	0.888204	5.91341e-09	9.81147e-09
BLT_RS0103025	657	hypothetical protein	315	77.4123	104	24.9182	1.63536	4.09157e-27	9.979e-27	up
BLT_RS0108160	1037	DNA topoisomerase I	299	46.5541	197	29.9045	0.638545	1.08266e-06	1.65447e-06
BLT_RS0103310	240	nitrogen-fixing protein NifU	22155	14904.8	9502	6232.36	1.25792	0	0	up
BLT_RS0106915	1851	hypothetical protein	5591	487.695	4593	390.606	0.320265	5.15705e-29	1.30412e-28
BLT_RS0116550	1041	hypothetical protein	465	72.1219	325	49.1452	0.553387	8.88549e-08	1.41695e-07
BLT_RS0105515	198	50S ribosomal protein L21	389	317.212	346	275.08	0.205594	0.0535796	0.0629181
BLT_RS0103660	867	hypothetical protein	697	129.801	635	115.293	0.170998	0.0306232	0.036867
BLT_RS0119230	426	hypothetical protein	943	357.41	715	264.207	0.43591	9.18831e-10	1.5546e-09
BLT_RS0120285	1833	hypothetical protein	1133	99.8004	1527	131.137	-0.393957	2.48956e-12	4.53336e-12
BLT_RS0110075	627	hypothetical protein	33	8.4979	71	17.8254	-1.06876	0.000267791	0.000372283
BLT_RS0114105	267	30S ribosomal protein S20	772	466.843	979	577.192	-0.306112	9.67807e-06	1.42917e-05
BLT_RS0107105	366	hypothetical protein	1878	828.475	5830	2507.47	-1.5977	0	0	down
BLT_RS0101290	348	hypothetical protein	363	168.42	88	39.8063	2.08099	2.43106e-42	7.22805e-42	up
BLT_RS0111810	729	bacillithiol biosynthesis deacetylase BshB1	586	129.788	180	38.8681	1.7395	2.77472e-53	9.05625e-53	up
BLT_RS0108110	552	hypothetical protein	796	232.83	492	140.306	0.730706	3.2446e-19	6.90851e-19
BLT_RS0107955	1377	16S rRNA (cytosine(967)-C(5))-methyltransferase	443	51.9439	570	65.1613	-0.32706	0.000326014	0.000451229
BLT_RS0114350	228	hypothetical protein	58	41.0732	16	11.0467	1.89458	2.969e-07	4.64044e-07	up
BLT_RS0120550	441	50S ribosomal protein L15	3180	1164.27	1617	577.192	1.0123	1.80631e-123	9.2724e-123	up
BLT_RS0100055	138	50S ribosomal protein L34	522	610.74	793	904.571	-0.566676	1.84608e-12	3.37138e-12
BLT_RS0100935	3264	methylmalonyl-CoA mutase	13884	686.799	4707	227.009	1.59714	0	0	up
BLT_RS0113175	444	hypothetical protein	2027	737.116	1376	487.848	0.595461	8.34833e-33	2.20885e-32
BLT_RS0108455	315	ribosome-binding factor A	242	124.042	200	99.9466	0.311603	0.0234872	0.0285401
BLT_RS0118060	210	hypothetical protein	27	20.7591	8	5.9968	1.79148	0.0007618	0.00103224
BLT_RS0116380	1755	5-oxoprolinase	1649	151.708	673	60.3652	1.32951	2.60956e-99	1.1834e-98	up
BLT_RS0111965	864	hypothetical protein	707	132.121	200	36.4389	1.85831	8.04784e-70	2.98276e-69	up
BLT_RS0101665	183	hypothetical protein	733	646.722	88	75.6973	3.09483	4.05415e-129	2.14234e-128	up
BLT_RS0102130	1272	hypothetical protein	527	66.8942	283	35.0226	0.933596	2.40792e-19	5.14735e-19
BLT_RS0110695	954	K+-dependent Na+/Ca+ exchanger	47	7.95453	8	1.32005	2.59118	2.23526e-08	3.63833e-08
BLT_RS0120485	753	hypothetical protein	313	67.1142	306	63.9698	0.0692265	0.55055	0.57797
BLT_RS0114765	810	thymidylate synthase	702	139.932	214	41.5889	1.75046	5.15557e-64	1.84554e-63	up
BLT_RS0111655	906	hypothetical protein	1204	214.567	860	149.424	0.522022	3.27634e-16	6.57534e-16
BLT_RS0102990	2346	ribonuclease R	2512	172.885	611	40.9979	2.07619	4.97835e-281	4.4196e-280	up
BLT_RS0120630	831	50S ribosomal protein L2	6358	1235.33	2545	482.098	1.3575	0	0	up
BLT_RS0108925	195	hypothetical protein	21	17.388	1271	1026.03	-5.88284	2.31999e-297	2.20487e-296	down
BLT_RS0118750	429	hypothetical protein	264	99.36	167	61.2785	0.697285	7.32602e-07	1.12959e-06
BLT_RS0111700	930	hypothetical protein	30	5.20839	94	15.9109	-1.6111	8.68463e-09	1.43401e-08
BLT_RS0100625	1104	X-prolyl-dipeptidyl aminopeptidase	487	71.2238	279	39.7817	0.840252	2.62823e-15	5.17823e-15
BLT_RS0116270	525	hypothetical protein	343	105.487	93	27.8851	1.9195	2.94203e-36	8.09649e-36	up
[truncated: 1,780 more rows]

## Sheet: DEG
#Gene	Length	Function	read_Mu	RPKM_Mu	read_Pu	RPKM_Pu	log2(Fold_change)	p_value	q-value	Result
BLT_RS0116370	1089	hypothetical protein	322	47.7412	114	16.4788	1.53462	2.19015e-25	5.22011e-25	up
BLT_RS0118325	1035	phosphoribosylaminoimidazole synthetase	264	41.184	947	144.032	-1.80623	3.1379e-87	1.33026e-86	down
BLT_RS0108405	1149	1-deoxy-D-xylulose 5-phosphate reductoisomerase	643	90.3558	262	35.8947	1.33185	6.2202e-40	1.80808e-39	up
BLT_RS0118885	1860	hypothetical protein	7048	611.812	873	73.8839	3.04976	0	0	up
BLT_RS0108590	774	hypothetical protein	281	58.6179	613	124.672	-1.08872	1.57101e-27	3.85148e-27	down
BLT_RS0109365	906	hypothetical protein	121	21.5636	21	3.64871	2.56314	4.6728e-19	9.92148e-19	up
BLT_RS0107190	543	C4-dicarboxylate ABC transporter	176	52.3333	633	183.507	-1.81003	4.35806e-59	1.50301e-58	down
BLT_RS0117240	297	hypothetical protein	91	49.4709	23	12.1905	2.02083	2.08939e-11	3.72732e-11	up
BLT_RS0110650	1401	hypothetical protein	4511	519.876	1362	153.034	1.76432	0	0	up
BLT_RS0120125	381	hypothetical protein	374	158.494	978	404.076	-1.3502	1.45924e-59	5.0604e-59	down
BLT_RS0115295	1521	hypothetical protein	984	104.455	2211	228.828	-1.13137	1.13371e-100	5.15981e-100	down
BLT_RS0113155	1152	sulfate adenylyltransferase	21405	3000.05	2166	295.975	3.34144	0	0	up
BLT_RS0112370	732	ribosomal large subunit pseudouridine synthase B	358	78.9654	128	27.5263	1.52041	1.10792e-27	2.72681e-27	up
BLT_RS0115735	702	hypothetical protein	877	201.71	252	56.5083	1.83575	9.02675e-85	3.76331e-84	up
BLT_RS0110440	294	hypothetical protein	448	246.034	35	18.74	3.71467	2.81103e-92	1.23757e-91	up
BLT_RS0120700	363	50S ribosomal protein L7/L12	897	398.98	2572	1115.35	-1.48312	1.28577e-176	8.30687e-176	down
BLT_RS0105605	441	hypothetical protein	110	40.2735	34	12.1364	1.73049	3.28672e-11	5.8165e-11	up
BLT_RS0102320	888	UTP--glucose-1-phosphate uridylyltransferase	327	59.4566	90	15.9543	1.89789	3.76652e-34	1.01508e-33	up
BLT_RS0100395	1041	hypothetical protein	1069	165.803	382	57.7645	1.52121	2.96519e-79	1.17641e-78	up
BLT_RS0106015	954	hypothetical protein	349	59.0666	1055	174.082	-1.55935	4.4257e-79	1.75033e-78	down
BLT_RS0111160	1335	hypothetical protein	3758	454.507	1613	190.196	1.25681	2.83427e-205	1.99509e-204	up
BLT_RS0106020	192	hypothetical protein	175	147.164	632	518.161	-1.81597	2.96663e-59	1.02501e-58	down
BLT_RS21285	1062	hypothetical protein	1208	183.657	360	53.3613	1.78315	1.41434e-111	6.8152e-111	up
BLT_RS0109970	243	hypothetical protein	56	37.2089	25	16.1951	1.20009	0.000320516	0.000443782	up
BLT_RS0120440	702	hypothetical protein	1140	262.2	21	4.70902	5.7991	7.84385e-274	6.77228e-273	up
BLT_RS0106570	969	membrane protein	5819	969.593	13532	2198.3	-1.18094	0	0	down
BLT_RS22340	1050	hypothetical protein	153	23.527	41	6.14672	1.93643	2.98928e-17	6.12965e-17	up
BLT_RS0114970	477	transcription elongation factor GreA	328	111.025	1016	335.293	-1.59454	1.11992e-78	4.42457e-78	down
BLT_RS0120585	540	50S ribosomal protein L5	3934	1176.27	1303	379.839	1.63076	0	0	up
BLT_RS0108570	1290	hypothetical protein	842	105.387	267	32.5814	1.69358	4.91596e-73	1.86037e-72	up
BLT_RS0119665	1251	hypothetical protein	696	89.8291	207	26.0472	1.78605	3.14815e-65	1.13339e-64	up
BLT_RS0120020	597	anthranilate synthase subunit II	3900	1054.76	1068	281.608	1.90516	0	0	up
BLT_RS0115120	1281	histidyl-tRNA synthetase	1225	154.402	309	37.9715	2.0237	1.12407e-133	6.0848e-133	up
BLT_RS0112150	1794	homocysteine methyltransferase	2132	191.88	384	33.6944	2.50962	9.90656e-300	9.48666e-299	up
BLT_RS0101675	786	hypothetical protein	653	134.139	1873	375.115	-1.4836	3.20072e-129	1.69611e-128	down
BLT_RS0118260	690	geranylgeranylglyceryl phosphate synthase	104	24.336	17	3.87836	2.64957	3.72539e-17	7.61837e-17	up
BLT_RS0114650	246	hypothetical protein	356	233.658	4	2.55961	6.51233	1.30986e-85	5.49123e-85	up
BLT_RS0118465	210	hypothetical protein	25	19.2214	62	46.4752	-1.27374	8.95204e-05	0.000127073	down
BLT_RS21850	234	hypothetical protein	62	42.78	156	104.944	-1.29461	3.11628e-10	5.35172e-10	down
BLT_RS0120415	438	hypothetical protein	1578	581.698	231	83.0207	2.80873	7.40858e-251	6.07664e-250	up
BLT_RS0113050	459	hypothetical protein	98	34.4729	254	87.1103	-1.33738	1.81291e-16	3.66369e-16	down
BLT_RS0120380	1626	hypothetical protein	429	42.5992	72	6.97045	2.6115	1.37812e-64	4.94733e-64	up
BLT_RS0108565	729	GntR family transcriptional regulator	427	94.5726	94	20.2978	2.2201	1.57039e-53	5.13882e-53	up
BLT_RS0120725	195	preprotein translocase subunit SecE	909	752.652	270	217.961	1.78792	9.71171e-85	4.0444e-84	up
BLT_RS0109370	1116	hypothetical protein	158	22.859	31	4.37266	2.38618	1.31254e-22	2.98326e-22	up
BLT_RS0117715	1884	PTS fructose transporter subunit IIC	905	77.5591	2298	192.007	-1.30779	6.48746e-131	3.47194e-130	down
BLT_RS0113235	189	hypothetical protein	40	34.1714	8	6.66311	2.35852	1.0114e-06	1.54776e-06	up
BLT_RS0108355	315	hypothetical protein	287	147.108	141	70.4624	1.06195	1.55122e-13	2.92784e-13	up
BLT_RS0117130	297	hypothetical protein	4038	2195.2	12115	6421.19	-1.54849	0	0	down
BLT_RS0105680	297	hypothetical protein	461	250.616	1026	543.801	-1.1176	8.40539e-47	2.59522e-46	down
BLT_RS21625	663	hypothetical protein	846	206.026	324	76.9272	1.42126	3.3241e-57	1.12888e-56	up
BLT_RS0117920	1908	threonyl-tRNA synthetase	376	31.8181	52	4.29016	2.89074	5.22007e-63	1.86156e-62	up
BLT_RS0108805	624	XRE family transcriptional regulator	21055	5447.98	8819	2224.76	1.29207	0	0	up
BLT_RS0112990	783	hypothetical protein	275	56.7069	797	160.231	-1.49855	7.05242e-57	2.38644e-56	down
BLT_RS0104855	1023	ketol-acid reductoisomerase	22236	3509.51	3032	466.554	2.91115	0	0	up
BLT_RS0116055	273	hypothetical protein	36	21.2914	13	7.496	1.50608	0.000595818	0.000811561	up
BLT_RS0113620	624	hypothetical protein	1212	313.605	393	99.1418	1.66138	1.51368e-101	6.94783e-101	up
BLT_RS0107110	453	hypothetical protein	502	178.925	211	73.3218	1.28704	5.20418e-30	1.33302e-29	up
BLT_RS0117245	897	hypothetical protein	244	43.92	42	7.37065	2.57502	5.98559e-37	1.66301e-36	up
BLT_RS0116340	216	hypothetical protein	167	124.833	25	18.2194	2.77644	7.49078e-28	1.84965e-27	up
BLT_RS0119820	1431	MFS transporter	2777	313.33	577	63.4724	2.30348	0	0	up
BLT_RS0104300	840	hypothetical protein	679	130.514	1664	311.833	-1.25658	1.05797e-89	4.59878e-89	down
BLT_RS0109800	903	hypothetical protein	426	76.1705	145	25.2772	1.5914	9.36708e-35	2.54625e-34	up
BLT_RS0102185	759	hypothetical protein	59	12.5509	180	37.3318	-1.57261	5.07616e-15	9.94928e-15	down
BLT_RS0109355	621	hypothetical protein	245	63.7	106	26.8697	1.24531	9.28227e-15	1.80433e-14	up
BLT_RS0119765	309	transcriptional regulator	2344	1224.8	264	134.491	3.18696	0	0	up
BLT_RS0110125	1116	hypothetical protein	538	77.8365	217	30.6087	1.34651	3.10938e-34	8.39176e-34	up
BLT_RS0110145	333	hypothetical protein	878	425.711	171	80.8352	2.39682	2.53912e-118	1.2622e-117	up
BLT_RS0114495	405	hypothetical protein	586	233.619	11	4.27549	5.77192	9.04412e-142	5.09305e-141	up
BLT_RS0109550	936	amidohydrolase	5475	944.438	391	65.7582	3.84421	0	0	up
BLT_RS0101760	1665	sulfate:proton symporter	3667	355.6	57	5.38901	6.04409	0	0	up
BLT_RS0117165	1227	hypothetical protein	484	63.6892	1215	155.876	-1.29128	8.76864e-69	3.23087e-68	down
BLT_RS0114810	219	hypothetical protein	392	289.006	102	73.317	1.97888	8.14925e-43	2.43638e-42	up
BLT_RS0113900	759	DNA repair protein RecO	3220	684.982	16615	3445.94	-2.33076	0	0	down
BLT_RS0113275	657	arginine ABC transporter permease	602	147.944	188	45.0444	1.71563	1.12651e-53	3.70237e-53	up
BLT_RS0102540	333	hypothetical protein	59	28.607	18	8.50897	1.74931	9.84458e-07	1.50806e-06	up
BLT_RS0118080	1176	3-hydroxybenzoate 6-hydroxylase	912	125.214	2806	375.603	-1.58481	5.59276e-212	4.05798e-211	down
BLT_RS0116360	1743	hypothetical protein	532	49.281	148	13.3664	1.88242	6.8681e-54	2.26515e-53	up
BLT_RS0114110	1056	hypothetical protein	2121	324.296	7392	1101.91	-1.76462	0	0	down
BLT_RS0115260	882	hypothetical protein	656	120.088	1658	295.913	-1.30108	2.95891e-94	1.31496e-93	down
BLT_RS0115745	1107	glucose-1-phosphate adenylyltransferase subunit GlgD	1526	222.573	677	96.2697	1.20912	1.23091e-79	4.90416e-79	up
BLT_RS0103315	303	hypothetical protein	107	57.0172	493	256.126	-2.16738	2.54646e-58	8.71852e-58	down
BLT_RS0112045	609	hypothetical protein	224	59.3876	75	19.3862	1.61513	2.00559e-19	4.29704e-19	up
BLT_RS0118135	492	hypothetical protein	441	144.723	32	10.2384	3.82123	1.25057e-92	5.52507e-92	up
BLT_RS0118915	858	hypothetical protein	379	71.3209	103	18.8973	1.91615	8.56628e-40	2.48429e-39	up
BLT_RS0110070	744	hypothetical protein	97	21.0506	280	59.2426	-1.49277	5.82433e-21	1.2851e-20	down
BLT_RS0101555	1380	hypothetical protein	8347	976.599	2980	339.927	1.52254	0	0	up
BLT_RS0114395	282	hypothetical protein	188	107.64	2	1.11643	6.59118	6.30108e-46	1.9297e-45	up
BLT_RS0101015	1317	hypothetical protein	574	70.3706	182	21.7538	1.69371	2.25576e-50	7.17622e-50	up
BLT_RS21215	558	hypothetical protein	4003	1158.29	455	128.359	3.17374	0	0	up
BLT_RS0117985	1083	hypothetical protein	1415	210.957	3286	477.626	-1.17893	1.16791e-158	7.01678e-158	down
BLT_RS0103930	573	hypothetical protein	181	51.0022	785	215.657	-2.08011	3.26296e-87	1.38172e-86	down
BLT_RS22770	402	hypothetical protein	1047	420.519	37	14.4885	4.85919	8.43005e-245	6.86967e-244	up
BLT_RS0106995	576	sortase	124	34.7588	45	12.2981	1.49894	2.15331e-10	3.71318e-10	up
BLT_RS0101095	630	uracil phosphoribosyltransferase	163	41.7746	1497	374.05	-3.16253	3.99815e-260	3.3597e-259	down
BLT_RS21785	492	hypothetical protein	2962	972.042	1330	425.535	1.19174	2.39941e-149	1.38636e-148	up
BLT_RS0110735	1071	luciferase	2638	397.695	688	101.122	1.97556	9.86845e-277	8.599e-276	up
BLT_RS0115500	687	two-component system response regulator	876	205.879	253	57.9712	1.82839	3.18193e-84	1.32218e-83	up
BLT_RS0102635	948	hypothetical protein	977	166.399	3632	603.096	-1.85774	0	0	down
BLT_RS0108680	1743	2-oxoglutarate ferredoxin oxidoreductase subunit alpha	6606	611.936	1355	122.374	2.32208	0	0	up
BLT_RS0109425	876	hypothetical protein	166	30.5963	70	12.5789	1.28235	6.75943e-11	1.18455e-10	up
BLT_RS0115075	1263	recombinase RarA	812	103.805	2049	255.38	-1.29877	1.02525e-115	5.04337e-115	down
BLT_RS0103565	762	hypothetical protein	1174	248.759	8212	1696.46	-2.76971	0	0	down
BLT_RS0111250	270	hypothetical protein	628	375.544	1391	810.984	-1.11069	3.30824e-62	1.16982e-61	down
BLT_RS0103720	406	3-hexulose-6-phosphate synthase	312	124.078	55	21.3248	2.54064	4.29774e-46	1.31832e-45	up
BLT_RS0101540	237	hypothetical protein	1291	879.514	358	237.784	1.88705	1.62585e-128	8.5675e-128	up
BLT_RS0115060	1161	hypothetical protein	1046	145.467	423	57.3531	1.34275	1.25423e-64	4.50685e-64	up
BLT_RS0113140	1623	ferredoxin-nitrite reductase	32967	3279.64	4439	430.542	2.92931	0	0	up
BLT_RS0115525	1281	hypothetical protein	376	47.3919	919	112.931	-1.25274	3.94888e-50	1.25203e-49	down
BLT_RS0118640	624	hypothetical protein	91	23.5463	33	8.32488	1.5	5.24997e-08	8.43978e-08	up
BLT_RS0102720	1191	hypothetical protein	4156	563.416	16321	2157.17	-1.93687	0	0	down
BLT_RS0108505	594	dihydrofolate reductase	1509	410.174	318	84.2732	2.28309	1.09742e-190	7.39388e-190	up
BLT_RS0120580	186	30S ribosomal protein S14	1955	1697.07	634	536.568	1.66121	1.44439e-162	8.80399e-162	up
BLT_RS0104125	1116	aminopeptidase	100	14.4677	301	42.4572	-1.55317	1.15366e-23	2.67698e-23	down
BLT_RS0107150	1302	isocitrate lyase	137634	17067.9	5429	656.383	4.7006	0	0	up
BLT_RS22820	258	hypothetical protein	165	103.259	53	32.3374	1.675	2.03235e-15	4.0189e-15	up
BLT_RS0112565	1491	stage V sporulation protein AF	483	52.304	2679	282.842	-2.435	0	0	down
BLT_RS0100820	462	hypothetical protein	133	46.4809	51	17.3771	1.41945	2.71848e-10	4.67922e-10	up
BLT_RS0109525	525	aromatic-ring-hydroxylating dioxygenase subunit beta	291	89.495	37	11.0941	3.01202	4.09e-51	1.30665e-50	up
BLT_RS0109630	282	hypothetical protein	142	81.3026	4479	2500.23	-4.94262	0	0	down
BLT_RS0100895	1828	hypothetical protein	11280	996.318	1760	151.56	2.71672	0	0	up
BLT_RS0116365	2049	hypothetical protein	513	40.4241	122	9.37274	2.10867	4.49343e-60	1.56255e-59	up
BLT_RS0117840	1098	hypothetical protein	204	29.998	1067	152.972	-2.35032	1.10843e-136	6.0875e-136	down
BLT_RS0110315	861	NmrA family transcriptional regulator	3911	733.415	1108	202.575	1.85618	0	0	up
BLT_RS22090	339	Cro/Cl family transcriptional regulator	243	115.737	124	57.5799	1.00721	7.79694e-11	1.36446e-10	up
BLT_RS0114535	273	hypothetical protein	232	137.211	3	1.72985	6.30961	8.06518e-57	2.7267e-56	up
BLT_RS0103080	273	hypothetical protein	3656	2162.26	778	448.607	2.26902	0	0	up
BLT_RS0117160	1206	hypothetical protein	437	58.5058	121	15.7938	1.88922	8.5986e-45	2.60373e-44	up
BLT_RS0105150	561	hypothetical protein	349	100.445	941	264.043	-1.39437	3.58565e-60	1.24803e-59	down
BLT_RS0119560	1158	hypothetical protein	1595	222.391	762	103.585	1.10229	5.66885e-72	2.12188e-71	up
BLT_RS0118015	1026	hypothetical protein	163	25.6511	18	2.76168	3.2154	4.15737e-31	1.07732e-30	up
BLT_RS0102680	2517	preprotein translocase subunit SecA	4980	319.456	13979	874.262	-1.45245	0	0	down
BLT_RS0114300	456	hypothetical protein	1663	588.833	558	192.627	1.61205	7.86897e-133	4.24744e-132	up
BLT_RS0113475	591	hypothetical protein	81	22.129	22	5.85981	1.91701	1.02838e-09	1.73682e-09	up
BLT_RS0114255	459	hypothetical protein	103	36.2318	468	160.503	-2.14727	7.84008e-55	2.60393e-54	down
BLT_RS0112210	948	hypothetical protein	723	123.139	2067	343.227	-1.47888	9.77062e-142	5.49397e-141	down
BLT_RS21315	1543	sodium:proton antiporter	430	44.9953	941	96.0003	-1.09326	1.26327e-41	3.7383e-41	down
BLT_RS0108430	1134	transcription termination factor NusA	530	75.4619	83	11.5216	2.7114	1.48943e-82	6.10828e-82	up
BLT_RS0108265	405	flagellar basal body-associated protein FliL	249	99.268	116	45.087	1.13862	3.44593e-13	6.43958e-13	up
BLT_RS0105020	1206	hypothetical protein	101	13.5219	216	28.1939	-1.06008	2.70357e-10	4.65567e-10	down
BLT_RS0103010	1605	hypothetical protein	3646	366.781	103	10.1021	5.18219	0	0	up
BLT_RS21840	296	30S ribosomal protein S1	1075	586.384	240	127.635	2.19983	1.8755e-130	9.99473e-130	up
BLT_RS0102280	2364	preprotein translocase subunit SecA	1972	134.687	6669	444.081	-1.72122	0	0	down
BLT_RS0117885	1137	hypothetical protein	348	49.4178	135	18.6905	1.40272	4.39269e-24	1.0275e-23	up
BLT_RS0108130	270	hypothetical protein	169	101.062	497	289.762	-1.51963	7.58641e-37	2.10622e-36	down
BLT_RS0102030	1125	hypothetical protein	363	52.0978	172	24.0671	1.11416	5.99735e-18	1.25017e-17	up
BLT_RS0116915	876	hypothetical protein	190	35.0199	81	14.5556	1.2666	4.68412e-12	8.45607e-12	up
BLT_RS0102815	699	hypothetical protein	330	76.2258	122	27.4746	1.47218	1.58874e-24	3.75584e-24	up
BLT_RS22050	303	hypothetical protein	164	87.3909	10	5.19525	4.07222	5.76515e-37	1.60412e-36	up
BLT_RS0117520	792	crotonase	4111	838.084	877	174.31	2.26544	0	0	up
BLT_RS0118140	1026	hypothetical protein	868	136.596	66	10.1262	3.75375	3.13937e-178	2.0387e-177	up
BLT_RS0109535	783	hypothetical protein	230	47.4276	93	18.6969	1.34293	1.71404e-15	3.39658e-15	up
BLT_RS0101470	972	hypothetical protein	312	51.8267	1797	291.025	-2.48938	1.89668e-244	1.53566e-243	down
BLT_RS0116980	1080	hypothetical protein	830	124.085	4265	621.647	-2.32477	0	0	down
BLT_RS0104465	1269	isocitrate dehydrogenase	5822	740.757	2604	323.019	1.19738	8.51113e-294	7.96837e-293	up
BLT_RS0104225	825	hypothetical protein	3686	721.384	16642	3175.41	-2.13811	0	0	down
BLT_RS0120685	3624	DNA-directed RNA polymerase subunit beta'	15686	698.858	5743	249.459	1.4862	0	0	up
BLT_RS0120780	1074	dna integrity scanning protein disa	4234	636.519	662	97.0292	2.71371	0	0	up
BLT_RS0117070	150	hypothetical protein	4206	4527.34	1364	1431.44	1.6612	0	0	up
BLT_RS0117950	1014	hypothetical protein	1169	186.141	2575	399.75	-1.1027	2.88377e-112	1.39314e-111	down
BLT_RS0108880	423	hypothetical protein	106	40.4604	569	211.749	-2.38777	3.8648e-75	1.49099e-74	down
BLT_RS0114740	195	hypothetical protein	275	227.7	608	490.815	-1.10804	4.62995e-28	1.14926e-27	down
BLT_RS21655	696	N-acetylmuramoyl-L-alanine amidase	11142	2584.75	26641	6025.46	-1.22104	0	0	down
BLT_RS0107875	690	hypothetical protein	158	36.972	398	90.7993	-1.29625	8.17985e-24	1.90392e-23	down
BLT_RS0116165	1512	sodium:proline symporter	672	71.76	300	31.2333	1.20009	1.16324e-35	3.17806e-35	up
BLT_RS0117780	1476	hypothetical protein	1285	140.566	279	29.7555	2.24003	5.25527e-159	3.16238e-158	up
BLT_RS0105660	216	hypothetical protein	399	298.253	1275	929.191	-1.63944	3.5317e-102	1.62501e-101	down
BLT_RS0110195	2073	hypothetical protein	1238	96.4243	579	43.9671	1.13297	9.7457e-59	3.35192e-58	up
BLT_RS0104710	771	electron transfer flavoprotein subunit beta	14088	2950.26	1639	334.636	3.14017	0	0	up
BLT_RS0111675	837	hypothetical protein	636	122.686	1929	362.79	-1.56416	1.24859e-143	7.06288e-143	down
BLT_RS0109395	243	hypothetical protein	53	35.2156	7	4.53462	2.95716	2.00031e-10	3.45724e-10	up
BLT_RS0100785	795	hypothetical protein	355	72.0985	177	35.0473	1.04067	6.69082e-16	1.33498e-15	up
BLT_RS0103355	354	hypothetical protein	11448	5221.45	32206	14321.3	-1.45564	0	0	down
BLT_RS0113770	2118	polyphosphate kinase	1255	95.6716	2691	200.003	-1.06386	1.03025e-110	4.95177e-110	down
BLT_RS0106830	480	hypothetical protein	67	22.5371	172	56.4074	-1.32358	1.79549e-11	3.21213e-11	down
BLT_RS0101780	480	hypothetical protein	1521	511.626	4	1.3118	8.6074	7.1352e-304	6.9206e-303	up
BLT_RS0110645	1095	hypothetical protein	2808	414.045	626	89.993	2.2019	0	0	up
BLT_RS0114755	306	hypothetical protein	313	165.154	99	50.9287	1.69726	2.51519e-28	6.2639e-28	up
BLT_RS0119930	990	thiamine-phosphate kinase	584	95.2451	196	31.1652	1.61171	7.71495e-48	2.41164e-47	up
BLT_RS0120010	849	dihydropteroate synthase	1064	202.348	52	9.64149	4.39144	5.36532e-239	4.3071e-238	up
BLT_RS0103885	993	hypothetical protein	8612	1400.3	2147	340.354	2.04062	0	0	up
BLT_RS0120200	378	reactive intermediate/imine deaminase	276	117.891	621	258.612	-1.13333	1.26627e-29	3.23032e-29	down
BLT_RS0120345	216	hypothetical protein	32	23.92	73	53.2008	-1.15323	8.50392e-05	0.000121077	down
BLT_RS0118275	957	hypothetical protein	372	62.7619	105	17.2713	1.86151	1.15415e-37	3.24971e-37	up
BLT_RS0119220	1149	hypothetical protein	469	65.9049	201	27.5375	1.25899	2.98239e-27	7.28792e-27	up
BLT_RS0111620	420	hypothetical protein	56	21.528	21	7.8708	1.45163	3.09099e-05	4.48033e-05	up
BLT_RS0110090	699	two-component system response regulator	320	73.9159	85	19.1421	1.94913	1.32509e-34	3.59681e-34	up
BLT_RS0115255	537	hypothetical protein	77	23.1516	324	94.9772	-2.03647	4.23532e-36	1.16302e-35	down
BLT_RS0103090	1179	acetyl-CoA acetyltransferase	9247	1266.35	1563	208.686	2.60126	0	0	up
BLT_RS0113825	1716	hypothetical protein	3088	290.553	283	25.9608	3.48439	0	0	up
BLT_RS0102480	498	hypothetical protein	730	236.678	274	86.6104	1.45032	4.39662e-51	1.40342e-50	up
BLT_RS0116275	960	catechol 2,3-dioxygenase	812	136.568	149	24.4323	2.48276	4.84014e-114	2.35637e-113	up
BLT_RS0120855	2049	hypothetical protein	381	30.0226	1060	81.4353	-1.43961	8.602e-71	3.19757e-70	down
BLT_RS0112060	573	30S ribosomal protein S1	1922	541.581	746	204.943	1.40196	5.27445e-125	2.72609e-124	up
BLT_RS0120800	534	hypothetical protein	5360	1620.65	1818	535.922	1.59648	0	0	up
BLT_RS0116245	1125	hypothetical protein	10976	1575.28	5554	777.145	1.01935	0	0	up
BLT_RS0115870	1182	hypothetical protein	315	43.0287	91	12.1192	1.82801	2.07184e-31	5.39479e-31	up
BLT_RS0120575	399	30S ribosomal protein S8	2622	1061.02	959	378.351	1.48766	2.04665e-185	1.35474e-184	up
BLT_RS0115675	1203	aminotransferase	14097	1892.02	4854	635.16	1.57474	0	0	up
BLT_RS0111425	552	hypothetical protein	2012	588.51	694	197.911	1.57222	1.17198e-154	6.94171e-154	up
BLT_RS0100265	480	50S rRNA methyltransferase	50	16.8188	104	34.1068	-1.01999	2.18131e-05	3.18255e-05	down
BLT_RS0104135	435	hypothetical protein	751	278.751	1676	606.504	-1.12154	1.00451e-75	3.87924e-75	down
BLT_RS0101265	1326	UDP-N-acetylglucosamine 1-carboxyvinyltransferase	7958	969.004	44412	5272.37	-2.44388	0	0	down
BLT_RS0107195	1281	C4-dicarboxylate ABC transporter permease	402	50.669	3536	434.522	-3.10026	0	0	down
BLT_RS0118555	633	hypothetical protein	627	159.93	4231	1052.18	-2.71787	0	0	down
BLT_RS0120530	219	translation initiation factor IF-1	1687	1243.76	815	585.817	1.08618	2.86373e-74	1.09694e-73	up
BLT_RS0107225	1125	hypothetical protein	121	17.3659	356	49.8134	-1.52027	6.9459e-27	1.6875e-26	down
BLT_RS0109890	1023	hypothetical protein	837	132.104	280	43.0855	1.6164	4.66337e-68	1.7099e-67	up
BLT_RS0106990	1242	hypothetical protein	162	21.06	46	5.83022	1.85288	3.22399e-17	6.60016e-17	up
BLT_RS0113955	579	hypothetical protein	4470	1246.5	16209	4406.83	-1.82185	0	0	down
BLT_RS0117225	885	hypothetical protein	203	37.0355	79	14.0518	1.39815	1.2386e-14	2.40023e-14	up
BLT_RS0111575	792	hypothetical protein	588	119.872	1467	291.577	-1.28239	8.43994e-82	3.43886e-81	down
BLT_RS0115130	441	D-tyrosyl-tRNA(Tyr) deacylase	734	268.734	267	95.3062	1.49554	1.13207e-53	3.71742e-53	up
BLT_RS0115175	663	membrane protein	184	44.8094	792	188.044	-2.0692	2.14086e-87	9.09626e-87	down
BLT_RS0117220	1056	ABC transporter substrate-binding protein	212	32.4143	74	11.031	1.55506	1.45777e-17	3.01462e-17	up
BLT_RS0104765	225	LuxR family transcriptional regulator	13947	10008.4	4652	3254.66	1.62063	0	0	up
BLT_RS0110160	816	hypothetical protein	534	105.661	150	28.9368	1.86847	1.45706e-53	4.77211e-53	up
BLT_RS0116495	1821	hypothetical protein	244	21.6344	117	10.114	1.09697	2.7664e-12	5.03019e-12	up
BLT_RS0118010	723	hypothetical protein	135	30.1481	31	6.74951	2.15921	1.70431e-17	3.51194e-17	up
BLT_RS0102235	426	hypothetical protein	53	20.0878	147	54.3196	-1.43516	3.87213e-11	6.83648e-11	down
BLT_RS0113045	579	transglutaminase	192	53.5412	1206	327.882	-2.61446	7.0354e-174	4.49908e-173	down
BLT_RS0107865	714	hypothetical protein	81	18.3169	1118	246.486	-3.75026	3.87975e-223	2.98741e-222	down
BLT_RS21195	582	hypothetical protein	253	70.188	67	18.1218	1.9535	8.6979e-28	2.14491e-27	up
BLT_RS0113425	216	hypothetical protein	57	42.6075	7	5.10144	3.06213	1.97258e-11	3.52226e-11	up
BLT_RS0103085	2382	3-hydroxyacyl-CoA dehydrogenase	12620	855.426	2738	180.942	2.24111	0	0	up
BLT_RS0107200	261	hypothetical protein	98	60.6248	1147	691.786	-3.51234	4.14336e-218	3.09563e-217	down
BLT_RS0112160	1119	cystathionine gamma-synthase	1343	193.781	518	72.8699	1.41103	9.02195e-89	3.88139e-88	up
BLT_RS0111980	714	ubiquinone/menaquinone biosynthesis methyltransferase	431	97.464	84	18.5195	2.39582	5.15646e-59	1.77512e-58	up
BLT_RS0113925	423	hypothetical protein	341	130.16	149	55.4491	1.23105	1.31198e-19	2.82057e-19	up
BLT_RS0108100	735	tRNA (guanine(37)-N(1))-methyltransferase	644	141.47	240	51.4011	1.46062	9.75549e-46	2.98036e-45	up
BLT_RS0112155	1167	cystathionine beta-lyase	1406	194.527	364	49.0997	1.98618	1.73977e-149	1.00677e-148	up
BLT_RS0111650	216	hypothetical protein	49	36.6275	135	98.385	-1.42551	2.95066e-10	5.07191e-10	down
BLT_RS0110140	897	hypothetical protein	1307	235.26	83	14.5658	4.0136	3.47827e-279	3.0449e-278	up
BLT_RS0110870	210	cro regulatory protein	150	115.329	34	25.4864	2.17795	1.858e-19	3.98308e-19	up
BLT_RS0105880	189	hypothetical protein	92	78.5943	259	215.718	-1.45665	7.26512e-19	1.53393e-18	down
BLT_RS0119175	201	hypothetical protein	634	509.282	304	238.082	1.09701	1.91814e-29	4.87677e-29	up
BLT_RS0110865	420	hypothetical protein	123	47.2847	36	13.4928	1.80919	4.69742e-13	8.73288e-13	up
BLT_RS21205	203	histidine kinase	32	25.4518	80	62.0358	-1.28533	7.41856e-06	1.10154e-05	down
BLT_RS0112315	1029	hypothetical protein	61	9.57149	189	28.9131	-1.59491	5.4702e-16	1.09433e-15	down
BLT_RS0120525	114	50S ribosomal protein L36	888	1257.69	440	607.57	1.04965	7.21741e-38	2.04747e-37	up
BLT_RS0109780	816	hypothetical protein	129	25.5249	24	4.62988	2.46286	2.16231e-19	4.62494e-19	up
BLT_RS0109255	234	hypothetical protein	235	162.15	904	608.137	-1.90707	1.3864e-89	6.01253e-89	down
BLT_RS0105210	525	hypothetical protein	159	48.8993	333	99.8467	-1.0299	1.89477e-14	3.66051e-14	down
BLT_RS0117090	909	hypothetical protein	245	43.5178	717	124.166	-1.5126	4.88846e-52	1.57912e-51	down
BLT_RS0108770	660	hypothetical protein	1424	348.362	218	51.995	2.74414	3.15972e-221	2.40356e-220	up
BLT_RS0114510	339	hypothetical protein	578	275.292	12	5.57225	5.62656	8.94954e-140	4.99506e-139	up
BLT_RS0111400	648	2-hydroxychromene-2-carboxylate isomerase	1371	341.608	396	96.1986	1.82825	1.03802e-130	5.53952e-130	up
BLT_RS0120495	870	hypothetical protein	365	67.739	109	19.7222	1.78016	6.7916e-35	1.84882e-34	up
BLT_RS0102520	819	hypothetical protein	1366	269.297	9626	1850.17	-2.78038	0	0	down
BLT_RS0112240	579	hypothetical protein	270	75.2922	118	32.0813	1.23077	7.64482e-16	1.52291e-15	up
BLT_RS0118230	291	glutamyl-tRNA amidotransferase subunit C	41	22.7487	9	4.86853	2.22422	1.7688e-06	2.68829e-06	up
BLT_RS0115495	1392	two-component system sensor histidine kinase	1937	224.675	656	74.1845	1.59865	1.45409e-152	8.50588e-152	up
BLT_RS0105065	1056	hypothetical protein	4763	728.252	2033	303.055	1.26486	3.28228e-262	2.77669e-261	up
BLT_RS0118310	1269	hypothetical protein	242	30.7906	1278	158.532	-2.36421	1.92999e-164	1.18404e-163	down
BLT_RS0113915	915	GTPase Era	961	169.577	488	83.9552	1.01425	1.0711e-38	3.07321e-38	up
BLT_RS0107650	909	hypothetical protein	187	33.2157	89	15.4126	1.10776	6.9531e-10	1.18225e-09	up
BLT_RS0114600	192	hypothetical protein	49	41.2059	4	3.2795	3.65131	2.13635e-11	3.80568e-11	up
BLT_RS0120540	654	adenylate kinase	4112	1015.17	2105	506.667	1.00262	1.3038e-156	7.79595e-156	up
BLT_RS0120795	1074	ATP--guanido phosphotransferase	11015	1655.94	2486	364.372	2.18417	0	0	up
BLT_RS0103120	669	methionine ABC transporter permease	424	102.33	89	20.9417	2.28878	4.13342e-55	1.37769e-54	up
BLT_RS0111560	639	hypothetical protein	7053	1782.12	15671	3860.51	-1.11519	0	0	down
BLT_RS0112555	1320	diaminopimelate decarboxylase	2318	283.534	5657	674.623	-1.25056	5.29235e-298	5.04243e-297	down
BLT_RS0120645	630	50S ribosomal protein L3	4488	1150.21	1151	287.596	1.99978	0	0	up
BLT_RS0116435	981	hypothetical protein	219	36.0446	30	4.81394	2.90449	1.31404e-37	3.69439e-37	up
BLT_RS0104415	849	acetyl-CoA carboxylase subunit beta	1176	223.648	419	77.6882	1.52546	2.38763e-87	1.01333e-86	up
BLT_RS0117035	759	short-chain dehydrogenase	145	30.8455	51	10.5774	1.54408	2.24503e-12	4.09401e-12	up
BLT_RS0101430	369	cation:proton antiporter	1164	509.321	249	106.224	2.26147	6.93844e-146	3.93665e-145	up
BLT_RS0102890	624	phosphoribosyl-ATP pyrophosphatase	231	59.7713	763	192.481	-1.68719	2.09505e-64	7.50675e-64	down
BLT_RS0108755	405	hypothetical protein	2690	1072.41	1378	535.603	1.00163	5.87327e-103	2.72905e-102	up
BLT_RS0120705	498	50S ribosomal protein L10	1354	438.99	2841	898.029	-1.03258	2.64781e-111	1.27426e-110	down
BLT_RS0117380	381	osmotically inducible protein C	2205	934.434	1113	459.853	1.02292	1.16432e-87	4.95262e-87	up
BLT_RS0120435	984	hypothetical protein	4230	694.081	137	21.9166	4.98501	0	0	up
BLT_RS0106585	1068	peptidase M24	287	43.3886	2125	313.211	-2.85174	0	0	down
BLT_RS0102835	1173	glycolate oxidase	305	41.9824	109	14.6277	1.52108	7.69936e-24	1.79319e-23	up
BLT_RS0107130	1035	hypothetical protein	163	25.428	381	57.9473	-1.18832	3.75168e-20	8.15856e-20	down
BLT_RS0104305	318	hypothetical protein	1598	811.362	5336	2641.42	-1.7029	0	0	down
BLT_RS0104945	1290	glutamate-1-semialdehyde aminotransferase	2901	363.097	806	98.3545	1.88429	1.09265e-285	9.88628e-285	up
BLT_RS0119715	1185	formamidase	1762	240.078	289	38.3909	2.64467	9.00416e-263	7.63432e-262	up
BLT_RS0100840	2052	penicillin-binding protein 2D	577	45.4008	1247	95.6616	-1.07522	3.52664e-53	1.15004e-52	down
BLT_RS0101215	315	NADH:ubiquinone oxidoreductase subunit K	24	12.3017	105	52.472	-2.09269	3.66241e-13	6.83734e-13	down
BLT_RS0103250	306	hypothetical protein	565	298.121	263	135.295	1.13978	5.38995e-28	1.33616e-27	up
BLT_RS0116350	771	hypothetical protein	754	157.9	76	15.517	3.34709	3.84713e-142	2.16969e-141	up
BLT_RS0103005	423	Fur family transcriptional regulator	2435	929.445	8972	3338.86	-1.84491	0	0	down
BLT_RS0109860	279	hypothetical protein	273	157.988	48	27.0823	2.54439	1.29416e-40	3.79399e-40	up
BLT_RS0104050	309	hypothetical protein	501	261.785	232	118.189	1.14728	2.94964e-25	7.0126e-25	up
BLT_RS0114985	1082	protease	1123	167.578	569	82.7816	1.01745	3.75632e-45	1.13927e-44	up
BLT_RS0111800	1137	hypothetical protein	393	55.8081	93	12.8757	2.11582	1.24028e-46	3.8232e-46	up
BLT_RS22815	258	hypothetical protein	178	111.395	81	49.4213	1.17248	3.02619e-10	5.19938e-10	up
BLT_RS0104540	1461	hypothetical protein	956	105.651	198	21.3336	2.30811	4.01866e-123	2.06011e-122	up
BLT_RS0102920	948	hypothetical protein	3872	659.465	753	125.036	2.39895	0	0	up
BLT_RS0108855	1403	hypothetical protein	416	47.8741	206	23.1131	1.05053	1.24858e-18	2.62885e-18	up
BLT_RS0114540	231	hypothetical protein	203	141.889	0.5	0.340727	8.70193	9.30599e-42	2.75817e-41	up
BLT_RS0118210	411	hypothetical protein	166	65.2126	393	150.522	-1.20675	3.28587e-21	7.28842e-21	down
BLT_RS0120365	459	hypothetical protein	460	161.812	222	76.1358	1.08767	1.56592e-21	3.49599e-21	up
BLT_RS22745	570	hypothetical protein	437	123.786	9	2.48551	5.63816	3.60241e-106	1.69687e-105	up
BLT_RS0112660	1080	hypothetical protein	719	107.491	246	35.8559	1.58393	4.46788e-57	1.51595e-56	up
BLT_RS0100095	1377	tRNA modification GTPase TrmE	1138	133.436	159	18.1766	2.876	7.48898e-186	4.96589e-185	up
BLT_RS0105675	477	hypothetical protein	449	151.982	1734	572.242	-1.91272	1.06039e-170	6.67921e-170	down
BLT_RS0107220	723	2,3,4,5-tetrahydropyridine-2,6-carboxylate N-succinyltransferase	154	34.3912	406	88.3968	-1.36195	4.75149e-26	1.13897e-25	down
BLT_RS22480	825	hypothetical protein	74	14.4825	234	44.6489	-1.62432	6.66088e-20	1.44103e-19	down
BLT_RS0120280	2028	methionyl-tRNA synthetase	406	32.3239	180	13.9718	1.21008	1.806e-22	4.09252e-22	up
BLT_RS0105985	744	hypothetical protein	3297	715.502	11706	2476.76	-1.79143	0	0	down
BLT_RS0119775	207	hypothetical protein	5118	3992.04	910	692.022	2.52824	0	0	up
BLT_RS0114020	765	hypothetical protein	230	48.5435	536	110.294	-1.184	1.52198e-27	3.73613e-27	down
BLT_RS0120805	471	hypothetical protein	4093	1403.09	1719	574.518	1.28818	4.61268e-232	3.64093e-231	up
BLT_RS0102535	1845	hypothetical protein	511	44.7187	195	16.6375	1.42644	1.97392e-35	5.389e-35	up
BLT_RS0101280	399	transposase	229	92.6675	33	13.0194	2.83141	2.69082e-38	7.69709e-38	up
BLT_RS0114500	255	hypothetical protein	342	216.546	4	2.46927	6.45445	1.70511e-82	6.98522e-82	up
BLT_RS0118095	489	hypothetical protein	125	41.273	31	9.97933	2.04818	2.36062e-15	4.65828e-15	up
BLT_RS0109730	717	hypothetical protein	2512	565.673	590	129.533	2.12665	1.12443e-289	1.03224e-288	up
BLT_RS0120015	852	hypothetical protein	1048	198.603	132	24.3884	3.02562	6.42637e-180	4.19493e-179	up
BLT_RS0103560	2121	hypothetical protein	727	55.3425	5330	395.581	-2.83751	0	0	down
BLT_RS0120170	561	hypothetical protein	748	215.28	5047	1416.18	-2.71772	0	0	down
BLT_RS0114710	780	antirepressor	484	100.188	59	11.9071	3.07282	2.32708e-85	9.74482e-85	up
BLT_RS0100900	1182	acetyl-CoA acetyltransferase	3550	484.927	724	96.4206	2.33035	0	0	up
BLT_RS0113880	654	transcriptional regulator	878	216.761	299	71.9684	1.59067	1.03772e-69	3.8423e-69	up
BLT_RS0101425	285	hypothetical protein	1016	575.591	181	99.9729	2.52543	6.32322e-145	3.58221e-144	up
BLT_RS22330	1256	transposase	270	34.7088	1466	183.735	-2.40426	4.87693e-192	3.30947e-191	down
BLT_RS0110360	1098	cobalt-precorrin-6A synthase	1783	262.189	4228	606.152	-1.20907	8.44063e-212	6.11257e-211	down
BLT_RS0109725	618	hypothetical protein	2211	577.651	646	164.548	1.81169	5.45235e-207	3.89616e-206	up
BLT_RS0120330	330	hypothetical protein	1253	613.059	7244	3455.52	-2.4948	0	0	down
BLT_RS22725	315	hypothetical protein	171	87.6497	85	42.4773	1.04506	1.86158e-08	3.03927e-08	up
BLT_RS0108765	636	hypothetical protein	1417	359.731	194	48.0168	2.90531	3.10661e-233	2.45729e-232	up
BLT_RS0118130	1290	C4-dicarboxylate ABC transporter permease	1552	194.253	171	20.8668	3.21866	7.99798e-281	7.08366e-280	up
BLT_RS0101820	714	hypothetical protein	4831	1092.46	13	2.86612	8.57426	0	0	up
BLT_RS0120720	534	transcription termination/antitermination factor NusG	2432	735.339	796	234.65	1.6479	1.85516e-199	1.28904e-198	up
BLT_RS0105925	915	hypothetical protein	2394	422.443	746	128.341	1.71877	2.57905e-208	1.84995e-207	up
BLT_RS0114585	423	hypothetical protein	111	42.3689	21	7.81498	2.43869	9.92929e-17	2.01958e-16	up
BLT_RS0101130	549	hypothetical protein	999	293.804	230	65.9484	2.15545	2.22882e-118	1.10941e-117	up
BLT_RS0104145	1077	3-deoxy-7-phosphoheptulonate synthase	4432	664.43	12217	1785.66	-1.42626	0	0	down
BLT_RS0104935	783	hypothetical protein	2349	484.38	298	59.9105	3.01526	0	0	up
BLT_RS0100175	939	hypothetical protein	869	149.424	369	61.8599	1.27233	7.97242e-50	2.51505e-49	up
BLT_RS0111765	2820	hypothetical protein	1341	76.7794	687	38.3492	1.00152	3.0531e-52	9.8709e-52	up
BLT_RS0108750	1269	hypothetical protein	945	120.236	333	41.3077	1.54139	1.29327e-71	4.82165e-71	up
BLT_RS0119170	1002	hypothetical protein	232	37.384	1404	220.571	-2.56075	1.4628e-197	1.01268e-196	down
BLT_RS0118090	1113	cupin	382	55.4158	110	15.5577	1.83266	7.43968e-38	2.10893e-37	up
BLT_RS0117415	1329	cytochrome D ubiquinol oxidase subunit I	370	44.9513	9408	1114.35	-4.6317	0	0	down
BLT_RS0106325	1140	hypothetical protein	150	21.2447	62	8.56122	1.31122	2.76492e-10	4.7548e-10	up
BLT_RS0115105	300	hypothetical protein	286	153.925	111	58.2439	1.40205	4.59244e-20	9.97541e-20	up
BLT_RS21990	483	hypothetical protein	260	86.9143	22	7.17008	3.59953	3.91265e-53	1.27482e-52	up
BLT_RS0109855	1149	hypothetical protein	958	134.62	182	24.9345	2.43268	3.90836e-131	2.09762e-130	up
BLT_RS0100545	1017	hypothetical protein	180	28.577	1549	239.761	-3.06867	8.69208e-262	7.33674e-261	down
BLT_RS0107365	960	2-nitropropane dioxygenase	938	157.76	350	57.3912	1.45883	1.11438e-65	4.03507e-65	up
BLT_RS22265	534	transposon DNA-invertase	81	24.4911	35	10.3175	1.24716	8.17391e-06	1.21275e-05	up
BLT_RS22040	618	hypothetical protein	489	127.757	23	5.85852	4.44672	1.41325e-111	6.81867e-111	up
BLT_RS22355	2010	NAD-dependent DNA ligase LigA	947	76.071	389	30.4651	1.32019	3.20527e-57	1.0895e-56	up
BLT_RS0111855	786	cytochrome CBB3	2881	591.815	1446	289.597	1.0311	1.99827e-115	9.81703e-115	up
BLT_RS0115520	282	hypothetical protein	754	431.705	1698	947.845	-1.1346	4.22126e-78	1.66077e-77	down
BLT_RS0111205	447	hypothetical protein	213	76.9373	61	21.4818	1.84057	5.86466e-22	1.3171e-21	up
BLT_RS0120765	483	2-C-methyl-D-erythritol 2,4-cyclodiphosphate synthase	214	71.5372	56	18.2511	1.97071	5.16544e-24	1.20676e-23	up
BLT_RS21560	950	transposase	2018	342.975	11757	1948.15	-2.50593	0	0	down
BLT_RS0105900	708	hypothetical protein	310	70.6958	1212	269.475	-1.93045	2.24564e-121	1.14189e-120	down
BLT_RS0112630	891	tyrosine recombinase XerD	430	77.9212	200	35.3347	1.14093	1.00053e-21	2.23903e-21	up
BLT_RS0118250	1004	ATP-dependent DNA helicase PcrA	278	44.7071	96	15.0517	1.57057	7.61224e-23	1.74278e-22	up
BLT_RS0111550	180	hypothetical protein	408	365.976	84	73.4608	2.3167	7.49801e-54	2.46859e-53	up
BLT_RS0111485	1425	hypothetical protein	327	37.0508	129	14.2503	1.37852	3.54482e-22	7.99439e-22	up
BLT_RS0105230	1686	terminase	223	21.3556	831	77.5876	-1.86121	6.65205e-80	2.65589e-79	down
BLT_RS0103210	1515	transporter	3361	358.196	332	34.4964	3.37623	0	0	up
BLT_RS0115900	777	IclR family transcriptional regulator	1823	378.818	215	43.5578	3.1205	0	0	up
BLT_RS0106285	741	hypothetical protein	180	39.2211	381	80.9386	-1.0452	1.12693e-16	2.28843e-16	down
BLT_RS0107850	3189	carbamoyl phosphate synthase large subunit	253	12.8095	1968	97.1447	-2.92293	0	0	down
BLT_RS0113260	507	hypothetical protein	225	71.6539	653	202.747	-1.50056	5.15773e-47	1.59902e-46	down
BLT_RS0106060	1062	hypothetical protein	1081	164.349	3079	456.388	-1.4735	5.07664e-209	3.65537e-208	down
BLT_RS0106280	438	hypothetical protein	255	94.0007	602	216.357	-1.20267	1.84222e-31	4.80019e-31	down
BLT_RS0109815	249	hypothetical protein	404	261.967	1131	715.01	-1.44858	4.25914e-76	1.64987e-75	down
BLT_RS0111220	369	hypothetical protein	2084	911.877	368	156.989	2.53817	9.346e-297	8.83771e-296	up
BLT_RS0116625	498	hypothetical protein	1397	452.931	173	54.6847	3.05008	5.90072e-241	4.75714e-240	up
BLT_RS0101860	1536	multicopper oxidase	3978	418.156	353	36.177	3.5309	0	0	up
BLT_RS0114465	2616	hypothetical protein	1263	77.9526	31	1.8654	5.38504	9.52074e-302	9.18715e-301	up
BLT_RS0118390	561	hypothetical protein	95	27.3417	8	2.24479	3.60645	1.67305e-20	3.65302e-20	up
BLT_RS0107975	882	hypothetical protein	278	50.891	639	114.046	-1.16414	1.07126e-31	2.79907e-31	down
BLT_RS0111585	903	hypothetical protein	4123	737.209	27293	4757.87	-2.69017	0	0	down
BLT_RS0106395	264	competence protein ComG	70	42.8114	21	12.5217	1.77356	7.33536e-08	1.17273e-07	up
BLT_RS0110620	582	phenolic acid decarboxylase subunit B	80	22.1938	19	5.13901	2.1106	1.05087e-10	1.83137e-10	up
BLT_RS0103115	1026	methionine ABC transporter ATP-binding protein	702	110.473	185	28.384	1.96054	2.35668e-74	9.03633e-74	up
BLT_RS0119180	390	hypothetical protein	44	18.216	193	77.9007	-2.09643	5.94788e-23	1.36422e-22	down
BLT_RS0104715	978	electron transfer flavoprotein subunit alpha	19462	3213.02	2672	430.077	2.90126	0	0	up
BLT_RS0100795	933	hypothetical protein	366	63.338	91	15.3535	2.0445	9.33885e-42	2.76574e-41	up
BLT_RS0110875	474	hypothetical protein	232	79.0269	81	26.9002	1.55473	4.56439e-19	9.69677e-19	up
BLT_RS0113120	1782	hypothetical protein	581	52.6421	1230	108.654	-1.04545	3.3032e-50	1.04819e-49	down
BLT_RS0106520	945	class A beta-lactamase	127	21.6989	46	7.66257	1.50172	1.23342e-10	2.14556e-10	up
BLT_RS0108810	216	hypothetical protein	723	540.443	2416	1760.73	-1.70396	1.53311e-202	1.07318e-201	down
BLT_RS0115960	498	hypothetical protein	123	39.8787	36	11.3795	1.80919	4.69742e-13	8.73288e-13	up
BLT_RS0107925	264	hypothetical protein	169	103.359	560	333.913	-1.69181	6.29965e-48	1.97086e-47	down
BLT_RS0105635	426	chemotaxis protein CheW	1120	424.496	407	150.395	1.49699	4.7798e-81	1.93085e-80	up
BLT_RS0108745	1260	hypothetical protein	1177	150.824	337	42.1025	1.84089	1.55041e-113	7.53829e-113	up
BLT_RS0118730	222	hypothetical protein	18	13.0914	47	33.3268	-1.34807	0.000365866	0.000504353	down
BLT_RS0107490	1860	cytochrome C oxidase	5831	506.169	1110	93.9418	2.42978	0	0	up
BLT_RS21280	352	GntR family transcriptional regulator	108	49.5389	28	12.5217	1.98413	5.52082e-13	1.02309e-12	up
BLT_RS0101835	261	hypothetical protein	1539	952.057	360	217.125	2.13252	6.83878e-179	4.44874e-178	up
BLT_RS0110135	711	cytochrome C biogenesis protein	525	119.222	34	7.52763	3.98531	6.9781e-113	3.38411e-112	up
BLT_RS0115165	1578	stage V sporulation protein B	2081	212.927	14167	1413.25	-2.73059	0	0	down
BLT_RS22270	168	transposase	79	75.9247	35	32.795	1.21109	1.673e-05	2.45326e-05	up
BLT_RS22550	1227	hypothetical protein	165	21.7122	68	8.72395	1.31545	3.2233e-11	5.70695e-11	up
BLT_RS0114880	558	6-phospho 3-hexuloisomerase	2510	726.281	552	155.723	2.22154	1.6376e-305	1.59656e-304	up
BLT_RS0119840	186	protein translocase TatA	1036	899.315	340	287.75	1.64401	8.2493e-86	3.46599e-85	up
BLT_RS0103830	297	hypothetical protein	279	151.675	108	57.2422	1.40583	1.09882e-19	2.37041e-19	up
BLT_RS0113185	435	hypothetical protein	717	266.131	169	61.157	2.12155	7.44026e-84	3.06799e-83	up
BLT_RS0102215	654	capsular biosynthesis protein	78	19.2567	180	43.3255	-1.16986	4.32718e-10	7.39758e-10	down
BLT_RS0109285	498	NADPH-dependent 7-cyano-7-deazaguanine reductase	301	97.5893	125	39.512	1.30443	5.34756e-19	1.1335e-18	up
BLT_RS0118545	633	hypothetical protein	675	172.173	4140	1029.54	-2.58008	0	0	down
BLT_RS0116230	1140	epoxyqueuosine reductase	20937	2965.34	91091	12578.2	-2.08466	0	0	down
BLT_RS0103620	1251	hypothetical protein	686	88.5384	309	38.8821	1.1872	8.85662e-36	2.42321e-35	up
BLT_RS0102580	147	hypothetical protein	89	97.7547	746	798.859	-3.0307	1.11876e-125	5.81415e-125	down
BLT_RS0114745	210	hypothetical protein	297	228.351	105	78.708	1.53667	1.38823e-23	3.21534e-23	up
BLT_RS0104130	450	general stress protein	205	73.554	74	25.8862	1.50662	2.4926e-16	5.01309e-16	up
BLT_RS0104235	1143	hypothetical protein	551	77.8342	128	17.6284	2.1425	1.16889e-65	4.22841e-65	up
BLT_RS0115560	1500	coproporphyrinogen dehydrogenase HemZ	1555	167.38	600	62.9664	1.41048	2.0131e-102	9.31956e-102	up
BLT_RS0118550	206	RNA polymerase subunit sigma	124	97.1895	429	327.823	-1.75404	5.79162e-39	1.663e-38	down
BLT_RS0116510	1788	hypothetical protein	387	34.9469	175	15.407	1.18157	9.36646e-21	2.05463e-20	up
BLT_RS0118925	1080	hypothetical protein	308	46.046	88	12.8265	1.84395	4.27368e-31	1.1067e-30	up
BLT_RS0114695	852	hypothetical protein	1183	224.187	15	2.77141	6.33794	1.53753e-281	1.36818e-280	up
BLT_RS0115020	2640	alanyl-tRNA synthetase	745	45.5635	341	20.3329	1.16406	1.44088e-37	4.04497e-37	up
BLT_RS0112225	222	hypothetical protein	5039	3664.85	342	242.506	3.91766	0	0	up
BLT_RS0112100	1350	germination protein YpeB	288	34.4448	138	16.0914	1.098	2.98546e-14	5.72947e-14	up
BLT_RS0113055	435	hypothetical protein	68	25.2397	267	96.6208	-1.93664	3.10019e-28	7.70555e-28	down
BLT_RS0111420	1053	hypothetical protein	5797	888.874	2353	351.757	1.3374	0	0	up
BLT_RS0100100	1899	tRNA uridine 5-carboxymethylaminomethyl modification protein	2097	178.295	383	31.7484	2.48951	3.46513e-292	3.22018e-291	up
BLT_RS0113730	219	hypothetical protein	4270	3148.1	1538	1105.51	1.50978	2.91655e-307	2.85822e-306	up
BLT_RS0100605	270	hypothetical protein	224	133.952	40	23.3209	2.52202	2.5632e-33	6.82978e-33	up
BLT_RS0101305	1005	rod shape-determining protein MreB	2341	376.097	786	123.113	1.61112	5.14476e-186	3.42349e-185	up
BLT_RS0102485	1746	flagellar hook-associated protein FlgK	2747	254.027	1165	105.034	1.27412	8.54961e-154	5.04026e-153	up
BLT_RS0114545	1137	hypothetical protein	924	131.213	16	2.21518	5.88834	2.88649e-222	2.20907e-221	up
BLT_RS0117480	1044	hypothetical protein	290	44.85	28	4.22188	3.40915	1.15584e-56	3.90421e-56	up
BLT_RS22225	677	polysaccharide deacetylase	203	48.4142	466	108.354	-1.16225	1.66835e-23	3.8594e-23	down
BLT_RS0114460	2112	hypothetical protein	1012	77.3663	31	2.31056	5.06539	1.94482e-239	1.56456e-238	up
BLT_RS0120675	420	30S ribosomal protein S12	3547	1363.57	1552	581.689	1.22907	2.93038e-187	1.95342e-186	up
BLT_RS0118590	321	hypothetical protein	97	48.7901	13	6.3751	2.93607	9.8409e-18	2.04346e-17	up
BLT_RS0108220	813	hypothetical protein	379	75.2686	164	31.7543	1.2451	5.61715e-22	1.26302e-21	up
BLT_RS0112515	645	sugar epimerase	1554	389.006	516	125.933	1.62714	6.64891e-126	3.46019e-125	up
BLT_RS0101870	360	hypothetical protein	407	182.54	24	10.4944	4.12052	1.13428e-89	4.9248e-89	up
BLT_RS0109985	984	glyoxalase	2951	484.216	345	55.1916	3.13313	0	0	up
BLT_RS0111500	942	hypothetical protein	1805	309.379	171	28.5755	3.43653	0	0	up
BLT_RS0120930	1041	peptide ABC transporter ATP-binding protein	379	58.7832	161	24.3458	1.27173	1.15837e-22	2.63603e-22	up
BLT_RS0101240	858	NADH:ubiquinone oxidoreductase subunit N	202	38.0127	549	100.724	-1.40586	2.8948e-36	7.97232e-36	down
BLT_RS0105665	225	hypothetical protein	415	297.804	1631	1141.09	-1.93798	1.7667e-163	1.08035e-162	down
BLT_RS0101900	690	hypothetical protein	929	217.386	2258	515.138	-1.2447	2.80607e-119	1.40789e-118	down
BLT_RS0107600	486	phosphopantetheine adenylyltransferase	95	31.5611	39	12.6321	1.32105	4.3767e-07	6.79559e-07	up
BLT_RS0114345	273	hypothetical protein	53	31.3457	3	1.72985	4.17955	3.47517e-13	6.49099e-13	up
BLT_RS0114590	264	hypothetical protein	75	45.8693	7	4.17391	3.45806	4.92371e-16	9.86573e-16	up
BLT_RS0114950	237	hypothetical protein	84	57.2263	336	223.172	-1.9634	1.03781e-35	2.83742e-35	down
BLT_RS0120790	2442	ATP-dependent Clp protease ATP-binding protein	39526	2613.38	14944	963.318	1.43983	0	0	up
BLT_RS0107405	186	hypothetical protein	101	87.6745	24	20.3117	2.10984	3.9792e-13	7.42142e-13	up
BLT_RS0101000	246	50S ribosomal protein L31	1774	1164.35	4015	2569.21	-1.1418	7.07311e-184	4.65739e-183	down
BLT_RS0119925	474	tRNA threonylcarbamoyladenosine biosynthesis protein TsaE	169	57.567	29	9.63093	2.57949	3.73749e-26	8.97616e-26	up
BLT_RS0117815	1029	hypothetical protein	5424	851.078	810	123.913	2.77996	0	0	up
BLT_RS0100675	342	hypothetical protein	483	228.027	79	36.3622	2.64869	1.40305e-73	5.3364e-73	up
BLT_RS0104375	285	hypothetical protein	218	123.503	81	44.7393	1.46493	1.26079e-16	2.55751e-16	up
BLT_RS0100400	981	hypothetical protein	446	73.4059	109	17.4907	2.06931	2.92656e-51	9.3655e-51	up
BLT_RS0114475	561	hypothetical protein	357	102.747	14	3.92838	4.70902	6.72497e-84	2.77607e-83	up
BLT_RS0106195	657	adapter protein MecA	75369	18522.2	31661	7585.91	1.28786	0	0	up
BLT_RS0118685	1086	hypothetical protein	403	59.9156	42	6.08791	3.29891	5.8869e-76	2.27574e-75	up
BLT_RS0109515	777	hypothetical protein	72	14.9615	156	31.6047	-1.07888	5.20915e-08	8.37771e-08	down
BLT_RS21290	765	hypothetical protein	630	132.967	181	37.2448	1.83596	1.98631e-61	6.97797e-61	up
BLT_RS0100050	1353	chromosomal replication initiator protein DnaA	1340	159.909	3009	350.085	-1.13046	3.92772e-136	2.15397e-135	down
BLT_RS0113195	651	hypothetical protein	1267	314.239	371	89.7102	1.80852	3.44352e-119	1.72542e-118	up
BLT_RS0112805	1092	L-ribulose-5-phosphate 4-epimerase	1803	266.586	858	123.684	1.10795	8.95839e-82	3.64617e-81	up
BLT_RS0107890	1260	MFS transporter	484	62.0212	1243	155.292	-1.32415	4.85403e-73	1.83878e-72	down
BLT_RS0115405	1215	hypothetical protein	192	25.5147	80	10.3648	1.29963	1.32484e-12	2.42888e-12	up
BLT_RS0114680	687	hypothetical protein	167	39.2487	7	1.60395	4.61294	6.64642e-40	1.929e-39	up
BLT_RS0114025	444	hypothetical protein	6649	2417.9	82773	29346.4	-3.60136	0	0	down
BLT_RS0114455	855	hypothetical protein	610	115.194	26	4.78692	4.58882	1.41641e-140	7.91723e-140	up
BLT_RS0112345	1779	sensor histidine kinase	3748	340.164	811	71.7618	2.24494	0	0	up
BLT_RS0120405	1056	chromosome partitioning protein ParA	7027	1074.41	2364	352.397	1.60827	0	0	up
BLT_RS0119910	1020	tRNA threonylcarbamoyladenosine modification protein TsaD	603	95.4514	274	42.2862	1.17458	3.77255e-31	9.79616e-31	up
BLT_RS21665	501	hypothetical protein	111	35.7726	919	288.753	-3.01291	1.65942e-153	9.76753e-153	down
BLT_RS0108030	948	hypothetical protein	656	111.728	248	41.1805	1.43995	1.3051e-45	3.97749e-45	up
BLT_RS0102845	1179	hydroxyglutarate oxidase	212	29.0327	67	8.9456	1.69843	1.00621e-19	2.17187e-19	up
BLT_RS0120275	771	hydrolase TatD	112	23.4546	34	6.94182	1.75649	1.35018e-11	2.41891e-11	up
BLT_RS0120920	897	diguanylate cyclase	155	27.9	77	13.5129	1.04593	8.39265e-08	1.34005e-07	up
BLT_RS0118890	336	hypothetical protein	195	93.7045	1636	766.466	-3.03203	2.77479e-273	2.39025e-272	down
BLT_RS0119990	999	tRNA-dihydrouridine synthase	2092	338.113	677	106.677	1.66425	2.89211e-174	1.85262e-173	up
BLT_RS0110000	408	hypothetical protein	619	244.96	80	30.8659	2.98846	7.54349e-106	3.54441e-105	up
BLT_RS0120545	1293	preprotein translocase subunit SecY	8257	1031.07	3737	454.96	1.18033	0	0	up
BLT_RS0107420	1839	GTP-binding protein	3754	329.593	700	59.9191	2.4596	0	0	up
BLT_RS0120635	291	50S ribosomal protein L23	2174	1206.23	745	403.006	1.58164	2.19144e-168	1.36441e-167	up
BLT_RS0115815	1188	hypothetical protein	2013	273.585	19166	2539.59	-3.21453	0	0	down
BLT_RS0112360	1656	cytochrome C biogenesis protein	3751	365.723	474	45.0575	3.02091	0	0	up
BLT_RS0115740	1191	glucose-1-phosphate adenylyltransferase	1454	197.114	374	49.432	1.99551	1.84789e-155	1.09797e-154	up
BLT_RS0113830	1728	hypothetical protein	4754	444.202	392	35.7101	3.63681	0	0	up
BLT_RS0108740	951	stage V sporulation protein K	20791	3529.88	450	74.487	5.56649	0	0	up
BLT_RS21680	243	hypothetical protein	110	73.0889	42	27.2077	1.42564	8.36032e-09	1.38227e-08	up
BLT_RS0102340	480	polysaccharide biosynthesis protein	136	45.747	31	10.1664	2.16986	1.03367e-17	2.14407e-17	up
BLT_RS0103440	444	hypothetical protein	84	30.5465	268	95.0168	-1.63718	8.40228e-23	1.91899e-22	down
BLT_RS0103445	273	transcriptional regulator	188	111.189	469	270.433	-1.28226	2.46913e-27	6.04545e-27	down
BLT_RS0114330	1488	hypothetical protein	199	21.5931	18	1.90423	3.5033	2.8558e-40	8.3462e-40	up
BLT_RS0117530	456	hypothetical protein	1193	422.416	131	45.2226	3.22355	1.21468e-216	9.03942e-216	up
BLT_RS0119300	576	hypothetical protein	631	176.877	77	21.0434	3.07131	1.19219e-110	5.72282e-110	up
BLT_RS0108560	2358	cell division protein FtsK	974	66.693	309	20.6283	1.69291	3.81753e-84	1.58107e-83	up
BLT_RS0106515	1812	BlaR1 family beta-lactam sensor/signal transducer	1137	101.314	299	25.9754	1.96361	1.74e-119	8.76503e-119	up
BLT_RS0120300	873	16S rRNA (cytidine(1402)-2'-O)-methyltransferase	198	36.6198	488	87.9942	-1.26479	8.26981e-28	2.04068e-27	down
BLT_RS0114440	1011	hypothetical protein	557	88.9547	9	1.40133	5.9882	1.14028e-134	6.19923e-134	up
BLT_RS0103230	1014	peptidase M23	89	14.1715	186	28.8751	-1.02683	1.13672e-08	1.87041e-08	down
BLT_RS0102910	462	hypothetical protein	1257	439.297	198	67.464	2.70301	1.82525e-192	1.24308e-191	up
BLT_RS0112485	468	6,7-dimethyl-8-ribityllumazine synthase	1809	624.105	667	224.351	1.47603	4.47981e-127	2.34754e-126	up
BLT_RS0104545	939	hypothetical protein	751	129.134	225	37.7195	1.77548	1.11756e-69	4.12984e-69	up
BLT_RS0110340	1647	cobalt-precorrin-3B C(17)-methyltransferase	3593	352.232	1664	159.041	1.14713	3.42403e-170	2.15314e-169	up
BLT_RS0117155	696	hypothetical protein	183	42.4529	37	8.36838	2.34284	2.07689e-25	4.95643e-25	up
BLT_RS0112220	1203	hypothetical protein	1195	160.386	453	59.2763	1.43602	2.86956e-81	1.16293e-80	up
BLT_RS0104445	232	exlusion protein FxsA	65	45.2366	214	145.203	-1.6825	3.3631e-19	7.15679e-19	down
BLT_RS0108610	1254	damage-inducible protein CinA	1950	251.074	960	120.51	1.05896	3.60313e-82	1.47447e-81	up
BLT_RS0120210	867	4-diphosphocytidyl-2C-methyl-D-erythritol kinase	740	137.809	199	36.1312	1.93135	8.97075e-77	3.49295e-76	up
BLT_RS0107590	390	hypothetical protein	231	95.634	64	25.8324	1.88834	1.86129e-24	4.3919e-24	up
BLT_RS0114115	198	hypothetical protein	1326	1081.29	8125	6459.62	-2.57869	0	0	down
BLT_RS0119770	2433	hypothetical protein	18873	1252.46	1261	81.5871	3.94028	0	0	up
BLT_RS0105955	786	hypothetical protein	2159	443.502	581	116.36	1.93035	4.39676e-220	3.298e-219	up
BLT_RS0116420	1167	hypothetical protein	162	22.4135	39	5.26069	2.09104	6.37733e-20	1.38127e-19	up
BLT_RS0109105	840	hypothetical protein	165	31.7154	1226	229.752	-2.85683	8.25556e-194	5.67363e-193	down
BLT_RS0119340	744	hypothetical protein	676	146.703	1422	300.868	-1.03623	5.86315e-57	1.98579e-56	down
BLT_RS0113090	1476	hypothetical protein	2094	229.063	543	57.9111	1.98383	2.6965e-221	2.05533e-220	up
BLT_RS0120750	1398	cysteinyl-tRNA synthetase	1405	162.268	661	74.4291	1.12444	1.23456e-65	4.46169e-65	up
BLT_RS0120165	228	hypothetical protein	408	288.928	2522	1741.24	-2.59133	0	0	down
BLT_RS0102430	633	Xaa-Pro dipeptidase	72	18.3651	186	46.2549	-1.33264	2.11373e-12	3.85831e-12	down
BLT_RS0101795	1128	hypothetical protein	3201	458.186	7	0.976872	8.87355	0	0	up
BLT_RS0116750	438	hypothetical protein	157	57.8749	390	140.165	-1.27611	7.61907e-23	1.74328e-22	down
BLT_RS0120840	489	adenosine deaminase	162	53.4898	677	217.936	-2.02657	4.83761e-73	1.8344e-72	down
BLT_RS0100920	1143	acyl-CoA dehydrogenase	7033	993.481	1374	189.23	2.39235	0	0	up
BLT_RS0105670	318	hypothetical protein	430	218.326	1331	658.87	-1.59351	2.1871e-102	1.01126e-101	down
BLT_RS0112830	189	hypothetical protein	31	26.4829	9	7.496	1.82087	0.000264697	0.000368252	up
BLT_RS0109545	1215	4-hydroxybenzoate 3-monooxygenase	244	32.4249	590	76.4407	-1.23724	3.3499e-32	8.78331e-32	down
BLT_RS0113975	554	hypothetical protein	1288	375.38	3420	971.773	-1.37227	1.43766e-208	1.0332e-207	down
BLT_RS22655	357	hypothetical protein	68	30.7543	17	7.496	2.0366	5.86104e-09	9.72887e-09	up
BLT_RS22665	273	hypothetical protein	91	53.82	23	13.2621	2.02083	2.08939e-11	3.72732e-11	up
BLT_RS0119755	720	peptidase	249	55.8383	78	17.0534	1.7112	4.09628e-23	9.41246e-23	up
BLT_RS0103740	633	3-hexulose-6-phosphate synthase	922	235.176	133	33.0748	2.82994	1.49753e-148	8.62621e-148	up
BLT_RS0112495	654	riboflavin synthase subunit alpha	5566	1374.14	473	113.85	3.59332	0	0	up
BLT_RS0109110	630	hypothetical protein	494	126.605	1454	363.306	-1.52085	1.92964e-104	9.03292e-104	down
BLT_RS0114000	1209	hypothetical protein	666	88.9432	144	18.7493	2.24605	1.28173e-83	5.27369e-83	up
BLT_RS0112355	1194	cytochrome C biogenesis protein	3421	462.609	819	107.976	2.09908	0	0	up
BLT_RS21300	306	antibiotic biosynthesis monooxygenase	207	109.223	52	26.7504	2.02964	3.93749e-24	9.23889e-24	up
BLT_RS0117690	324	hypothetical protein	3459	1723.74	8262	4014.11	-1.21954	0	0	down
BLT_RS0112025	267	hypothetical protein	5983	3618.04	19080	11249	-1.63652	0	0	down
BLT_RS0104170	633	acetoin dehydrogenase	1004	256.091	360	89.5257	1.51629	3.3413e-74	1.27857e-73	up
BLT_RS0104635	207	spore protein	34	26.52	185	140.686	-2.40732	7.92031e-26	1.89615e-25	down
BLT_RS0105630	2040	chemotaxis protein CheA	4642	367.401	1316	101.549	1.85518	0	0	up
BLT_RS0103785	1173	hypothetical protein	1582	217.758	709	95.1474	1.19449	5.96931e-81	2.40622e-80	up
BLT_RS0117585	744	hypothetical protein	231	50.1307	958	202.694	-2.01554	7.34326e-102	3.37468e-101	down
BLT_RS0113960	999	hypothetical protein	6589	1064.93	17624	2777.08	-1.38281	0	0	down
BLT_RS0106675	510	acetyl-CoA carboxylase biotin carboxyl carrier protein subunit	106	33.5584	42	12.9637	1.3722	3.93006e-08	6.34493e-08	up
BLT_RS0119995	207	hypothetical protein	429	334.62	76	57.7952	2.5335	1.63496e-62	5.80856e-62	up
BLT_RS0118820	1194	hypothetical protein	510	68.9653	225	29.6638	1.21717	4.73474e-28	1.1745e-27	up
BLT_RS0105325	216	hypothetical protein	126	94.185	290	211.345	-1.16603	2.74434e-15	5.40136e-15	down
BLT_RS0101115	714	ATP synthase subunit A	587	132.741	145	31.9682	2.0539	2.86051e-66	1.04076e-65	up
BLT_RS0120715	426	50S ribosomal protein L11	3485	1320.86	9327	3446.52	-1.38366	0	0	down
BLT_RS0113305	378	hypothetical protein	48	20.5029	6	2.49867	3.0366	8.70786e-10	1.47463e-09	up
BLT_RS0104435	396	hypothetical protein	357	145.559	1006	399.9	-1.45804	1.54177e-68	5.67523e-68	down
BLT_RS0115805	825	hypothetical protein	181	35.4234	85	16.2186	1.12705	7.62822e-10	1.29412e-09	up
BLT_RS0101295	1536	symporter	6994	735.19	1114	114.168	2.68696	0	0	up
BLT_RS0102760	873	prolipoprotein diacylglyceryl transferase	270	49.9361	120	21.6379	1.20652	2.11794e-15	4.18596e-15	up
BLT_RS0120030	924	cysteine synthase	38608	6746.37	9985	1701.08	1.98766	0	0	up
BLT_RS0107855	780	hypothetical protein	88	18.216	604	121.896	-2.74238	1.36277e-92	6.01373e-92	down
BLT_RS0111895	1128	prephenate dehydrogenase	2120	303.453	330	46.0525	2.72012	0	0	up
BLT_RS0117055	327	hypothetical protein	81	39.9947	25	12.0349	1.73259	1.22073e-08	2.00253e-08	up
BLT_RS0112640	459	Fur family transcriptional regulator	1753	616.644	8134	2789.59	-2.17754	0	0	down
BLT_RS0113895	759	DNA repair protein RecO	3229	686.897	16308	3382.26	-2.29982	0	0	down
BLT_RS0112930	1848	asparagine synthase	721	62.9939	346	29.4729	1.09582	3.37133e-33	8.96407e-33	up
BLT_RS0115170	240	hypothetical protein	2821	1897.83	8482	5563.34	-1.5516	0	0	down
BLT_RS0117110	189	hypothetical protein	41	35.0257	116	96.6151	-1.46383	2.5466e-09	4.26657e-09	down
BLT_RS0113400	876	hypothetical protein	89	16.404	264	47.4404	-1.53207	1.43996e-20	3.15138e-20	down
BLT_RS0112440	684	hypothetical protein	754	177.984	369	84.9218	1.06754	2.86067e-33	7.61702e-33	up
BLT_RS0114685	345	hypothetical protein	198	92.664	2	0.912556	6.66595	4.03921e-48	1.26578e-47	up
BLT_RS0115880	201	hypothetical protein	74	59.443	11	8.6148	2.78662	2.97282e-13	5.57754e-13	up
BLT_RS0118380	195	hypothetical protein	50	41.4	108	87.1842	-1.07444	6.34672e-06	9.43506e-06	down
BLT_RS0120625	279	30S ribosomal protein S19	2372	1372.7	591	333.451	2.04147	7.8192e-260	6.55596e-259	up
BLT_RS0114610	288	hypothetical protein	62	34.7588	5	2.73292	3.66886	4.49804e-14	8.59296e-14	up
BLT_RS0102935	588	ATP-dependent Clp protease proteolytic subunit	14062	3861.31	4771	1277.26	1.59603	0	0	up
BLT_RS0107715	1113	hypothetical protein	425	61.6537	112	15.8406	1.96056	9.9221e-46	3.02881e-45	up
BLT_RS0114770	462	hypothetical protein	338	118.124	135	45.9982	1.36066	1.88895e-22	4.27791e-22	up
BLT_RS0103700	1458	hypothetical protein	279	30.8967	66	7.12582	2.11632	1.2872e-33	3.44197e-33	up
BLT_RS0101620	270	hypothetical protein	47	28.106	189	110.191	-1.97106	6.64109e-21	1.4636e-20	down
BLT_RS0103265	645	hypothetical protein	3338	835.587	8342	2035.91	-1.28481	0	0	down
BLT_RS0113615	2775	hypothetical protein	5857	340.783	1840	104.377	1.70705	0	0	up
BLT_RS0111505	459	hypothetical protein	516	181.511	2741	940.037	-2.37266	0	0	down
BLT_RS0101010	462	hypothetical protein	2478	866.013	595	202.733	2.09481	2.07611e-280	1.83018e-279	up
BLT_RS0100655	678	uracil-DNA glycosylase	238	56.6777	608	141.164	-1.31651	2.52217e-36	6.95117e-36	down
BLT_RS0101865	363	hypothetical protein	400	177.917	46	19.948	3.15689	1.31562e-72	4.96385e-72	up
BLT_RS0111275	1146	RNA methyltransferase	376	52.9747	1881	258.376	-2.2861	1.16673e-231	9.19012e-231	down
BLT_RS0109520	1353	3-phenylpropionate dioxygenase	1443	172.2	122	14.1942	3.60071	3.40632e-286	3.09688e-285	up
BLT_RS0111055	1278	hypothetical protein	894	112.946	287	35.3508	1.67582	2.6047e-76	1.01002e-75	up
BLT_RS0113805	1326	DEAD/DEAH box helicase	1153	140.395	243	28.8477	2.28296	3.6085e-146	2.05043e-145	up
BLT_RS0105860	285	hypothetical protein	920	521.204	2550	1408.46	-1.4342	1.15754e-166	7.17145e-166	down
BLT_RS0100770	504	hypothetical protein	299	95.7868	129	40.291	1.24937	9.31976e-18	1.93631e-17	up
BLT_RS0111975	834	prenyltransferase	597	115.578	199	37.5609	1.62156	2.79994e-49	8.80348e-49	up
BLT_RS0110550	588	hypothetical protein	3689	1012.97	1846	494.2	1.03542	2.97033e-148	1.70839e-147	up
BLT_RS0110750	1215	hypothetical protein	720	95.68	212	27.4668	1.80053	3.79037e-68	1.39115e-67	up
BLT_RS0104255	1599	hypothetical protein	226	22.8205	105	10.3369	1.14253	3.63628e-12	6.58333e-12	up
BLT_RS0104995	1113	hypothetical protein	244	35.3965	119	16.8306	1.07252	6.77475e-12	1.21952e-11	up
BLT_RS0120590	312	50S ribosomal protein L24	2450	1267.88	740	373.358	1.76378	6.75723e-221	5.11948e-220	up
BLT_RS0110855	390	hypothetical protein	457	189.198	2417	975.575	-2.36636	0	0	down
BLT_RS0102350	306	hypothetical protein	417	220.029	1343	690.881	-1.65074	1.44337e-108	6.85872e-108	down
BLT_RS0114670	399	hypothetical protein	236	95.5002	4	1.5781	5.91924	3.41637e-58	1.16757e-57	up
BLT_RS0119540	1032	hypothetical protein	1616	252.829	138	21.0498	3.58628	0	0	up
BLT_RS0114855	567	hypothetical protein	125	35.5952	61	16.9354	1.07164	9.18177e-07	1.40939e-06	up
BLT_RS0111135	1200	hypothetical protein	1474	198.327	391	51.2914	1.95109	4.97225e-153	2.91762e-152	up
BLT_RS0103430	183	hypothetical protein	516	455.264	1680	1445.13	-1.66642	3.98762e-137	2.1996e-136	down
BLT_RS0101610	447	hypothetical protein	923	333.395	416	146.499	1.18634	1.73087e-47	5.38381e-47	up
BLT_RS0117490	486	hypothetical protein	4676	1553.47	603	195.312	2.99164	0	0	up
BLT_RS0120375	684	hypothetical protein	183	43.1976	65	14.9591	1.52993	4.82171e-15	9.46038e-15	up
BLT_RS0100555	1563	heme ABC transporter ATP-binding protein	243	25.1022	892	89.8369	-1.83949	2.63554e-84	1.09635e-83	down
BLT_RS0115340	1044	uroporphyrinogen decarboxylase	280	43.3035	92	13.8719	1.64232	2.0182e-24	4.75619e-24	up
BLT_RS0119835	777	preprotein translocase subunit TatC	2115	439.495	576	116.694	1.91311	4.22379e-213	3.08845e-212	up
BLT_RS0100800	909	hypothetical protein	276	49.0242	33	5.71477	3.10073	7.23213e-50	2.28533e-49	up
BLT_RS0108780	297	hypothetical protein	154	83.72	31	16.4306	2.34919	1.05629e-21	2.36241e-21	up
BLT_RS0116175	894	hypothetical protein	446	80.5494	59	10.3887	2.95485	5.55429e-76	2.14937e-75	up
BLT_RS0121075	248	capsular biosynthesis protein	43	27.9951	218	138.374	-2.30532	1.02022e-28	2.56107e-28	down
BLT_RS0101105	228	hypothetical protein	835	591.312	155	107.015	2.4661	2.47266e-116	1.22272e-115	up
BLT_RS0111775	384	aspartate decarboxylase	243	102.174	101	41.4037	1.3032	1.29444e-15	2.57184e-15	up
BLT_RS0102975	1287	enolase	1369	171.747	8130	994.399	-2.53354	0	0	down
BLT_RS0110980	327	hypothetical protein	300	148.128	749	360.564	-1.28341	1.06531e-42	3.1774e-42	down
BLT_RS0101135	1512	F0F1 ATP synthase subunit alpha	3174	338.938	840	87.4533	1.95444	0	0	up
BLT_RS0118870	348	ArsR family transcriptional regulator	1292	599.444	74	33.4735	4.16253	6.90166e-282	6.18527e-281	up
BLT_RS21520	911	hypothetical protein	828	146.75	2137	369.262	-1.33129	3.21985e-125	1.67105e-124	down
BLT_RS0120445	627	hypothetical protein	218	56.1376	17	4.26806	3.71732	7.26108e-46	2.2219e-45	up
BLT_RS0107720	906	hypothetical protein	791	140.966	218	37.8771	1.89595	5.5824e-80	2.23355e-79	up
BLT_RS0108775	825	hypothetical protein	1087	212.736	335	63.9204	1.73471	6.8943e-97	3.10408e-96	up
BLT_RS0114875	771	hypothetical protein	537	112.457	91	18.5796	2.59758	6.41534e-80	2.5641e-79	up
BLT_RS0104915	477	hypothetical protein	74	25.0483	27	8.91034	1.49116	1.02614e-06	1.56937e-06	up
BLT_RS21240	1541	hypothetical protein	62	6.49612	214	21.8605	-1.75068	3.27467e-20	7.13356e-20	down
BLT_RS0115065	420	Rrf2 family transcriptional regulator	257	98.7982	79	29.6092	1.73844	2.65947e-24	6.25182e-24	up
BLT_RS0101660	390	hypothetical protein	1747	723.258	224	90.4133	2.9999	4.09685e-296	3.86435e-295	up
BLT_RS0114890	625	3-hexulose-6-phosphate synthase	991	256.011	124	31.2313	3.03514	9.5465e-171	6.02324e-170	up
BLT_RS0117575	1716	urease subunit alpha	287	27.0041	1110	101.825	-1.91484	3.79531e-110	1.81722e-109	down
BLT_RS0116200	558	hypothetical protein	47	13.5997	218	61.4994	-2.177	6.92284e-27	1.68298e-26	down
BLT_RS0116235	684	hypothetical protein	1552	366.354	489	112.539	1.70282	5.15432e-134	2.79414e-133	up
BLT_RS0102290	1437	hypothetical protein	448	50.3369	1258	137.807	-1.45297	8.32919e-85	3.47633e-84	down
BLT_RS0119950	492	cystathionine gamma-synthase	128	42.0059	675	215.967	-2.36215	1.0889e-87	4.63703e-87	down
BLT_RS0103410	627	hypothetical protein	757	194.937	5674	1424.53	-2.86941	0	0	down
BLT_RS21835	598	hypothetical protein	477	128.79	1277	336.154	-1.3841	4.09453e-80	1.64173e-79	down
BLT_RS21940	222	hypothetical protein	28	20.3643	79	56.0174	-1.45983	9.24154e-07	1.41684e-06	down
BLT_RS0107970	2037	hypothetical protein	907	71.8921	2565	198.219	-1.46319	1.13835e-172	7.23065e-172	down
BLT_RS0109300	765	hypothetical protein	1149	242.507	437	89.9226	1.43127	7.8233e-78	3.06833e-77	up
BLT_RS0114825	231	hypothetical protein	748	522.823	239	162.868	1.68262	1.64685e-64	5.90642e-64	up
BLT_RS0107305	300	hypothetical protein	2177	1171.66	7024	3685.63	-1.65336	0	0	down
BLT_RS0109840	1164	hypothetical protein	682	94.6012	65	8.79041	3.42786	2.79354e-131	1.50357e-130	up
BLT_RS0104880	585	isopropylmalate isomerase	10113	2791.19	2770	745.371	1.90485	0	0	up
BLT_RS0118695	324	hypothetical protein	307	152.988	13	6.31607	4.59825	9.16602e-72	3.4241e-71	up
BLT_RS0112530	1113	tRNA (5-methylaminomethyl-2-thiouridylate)-methyltransferase	1085	157.398	247	34.9342	2.17171	1.36096e-129	7.2221e-129	up
BLT_RS0108440	312	50S ribosomal protein L7ae	145	75.0375	40	20.1815	1.89458	5.31788e-16	1.06442e-15	up
BLT_RS0109880	477	hypothetical protein	1228	415.667	143	47.1918	3.13882	1.01534e-217	7.57087e-217	up
BLT_RS0100315	1500	malate:quinone oxidoreductase	1037	111.623	440	46.1753	1.27344	3.45752e-59	1.19352e-58	up
BLT_RS0117500	2424	molybdopterin-binding protein	16674	1110.64	1378	89.4881	3.63355	0	0	up
BLT_RS0120305	282	hypothetical protein	42	24.0472	106	59.1705	-1.29901	1.98298e-07	3.11871e-07	down
BLT_RS0107040	1197	hypothetical protein	595	80.2579	197	25.9072	1.63129	1.57651e-49	4.96508e-49	up
BLT_RS0108025	996	phosphate acyltransferase	433	70.193	113	17.8594	1.97464	5.55347e-47	1.7203e-46	up
BLT_RS0104120	1299	UDP-N-acetylmuramate--alanine ligase	6936	862.115	32793	3973.93	-2.20462	0	0	down
BLT_RS0110040	1542	aminobenzoyl-glutamate transporter	327	34.2396	166	16.9462	1.0147	3.15743e-14	6.05334e-14	up
BLT_RS0117820	759	ABC transporter permease	2895	615.846	110	22.8139	4.75458	0	0	up
BLT_RS0102840	1191	hypothetical protein	300	40.67	90	11.8954	1.77356	7.70512e-29	1.93939e-28	up
BLT_RS0112895	396	hypothetical protein	99	40.365	24	9.54036	2.08099	1.0689e-12	1.96347e-12	up
BLT_RS0115585	1353	hypothetical protein	2012	240.102	853	99.243	1.27461	3.09387e-113	1.50234e-112	up
BLT_RS0120315	345	DNA replication initiation control protein YabA	1086	508.248	2716	1239.25	-1.28586	2.00042e-150	1.16296e-149	down
BLT_RS0109075	819	NAD synthetase	640	126.171	314	60.3524	1.0639	2.41334e-28	6.01421e-28	up
BLT_RS0106605	930	stage III sporulation protein AA	446	77.4314	227	38.423	1.01095	9.65025e-19	2.03524e-18	up
BLT_RS0109845	345	hypothetical protein	141	65.988	13	5.93161	3.47571	7.39503e-29	1.86382e-28	up
BLT_RS0105045	771	hypothetical protein	118	24.7111	276	56.3512	-1.18929	4.83937e-15	9.49009e-15	down
BLT_RS0117745	1323	multidrug transporter MatE	1712	208.934	4338	516.153	-1.30475	1.76344e-244	1.43085e-243	down
BLT_RS0103520	423	hypothetical protein	132	50.3847	857	318.925	-2.66216	1.45382e-126	7.5973e-126	down
BLT_RS0103130	369	hypothetical protein	42	18.3776	171	72.9488	-1.98894	2.84453e-19	6.0738e-19	down
BLT_RS0108820	240	hypothetical protein	1331	895.43	4752	3116.84	-1.79943	0	0	down
BLT_RS21385	1407	diguanylate cyclase	3366	386.265	11884	1329.59	-1.78332	0	0	down
BLT_RS0109015	711	hypothetical protein	115	26.1152	599	132.619	-2.34433	2.38382e-77	9.32038e-77	down
BLT_RS0117045	759	short-chain dehydrogenase	144	30.6327	37	7.67377	1.99707	6.11224e-17	1.24657e-16	up
BLT_RS0106275	906	hypothetical protein	193	34.3949	487	84.6154	-1.29873	7.4717e-29	1.88189e-28	down
BLT_RS0110820	555	hypothetical protein	381	110.84	127	36.0213	1.62156	4.48642e-32	1.1755e-31	up
BLT_RS0109385	1122	hypothetical protein	181	26.0466	66	9.25976	1.49205	2.07735e-14	4.00504e-14	up
BLT_RS0104670	1722	hypothetical protein	442	41.4433	177	16.1804	1.35689	9.66775e-29	2.43014e-28	up
BLT_RS22460	150	hypothetical protein	6954	7485.29	799	838.502	3.15817	0	0	up
BLT_RS0113245	1119	hypothetical protein	1209	174.446	563	79.2003	1.1392	6.76794e-58	2.30881e-57	up
BLT_RS0105805	1182	KamA family radical SAM protein	543	74.1733	1852	246.645	-1.73346	1.75167e-159	1.05576e-158	down
BLT_RS21770	1335	hypothetical protein	2735	330.781	536	63.2022	2.38783	0	0	up
BLT_RS0113345	379	permease	140	59.6422	68	28.2435	1.07842	1.77693e-07	2.80752e-07	up
BLT_RS0112680	534	hypothetical protein	2387	721.732	358	105.534	2.77376	0	0	up
BLT_RS0113600	561	5-formyltetrahydrofolate cyclo-ligase	251	72.2397	584	163.87	-1.18169	8.95354e-30	2.28718e-29	down
BLT_RS0112995	1125	hypothetical protein	1281	183.849	472	66.0447	1.47701	1.2284e-90	5.3519e-90	up
BLT_RS21375	567	hypothetical protein	163	46.4162	42	11.6604	1.99301	6.34374e-19	1.34164e-18	up
BLT_RS21355	1707	hypothetical protein	568	53.7254	1180	108.817	-1.01823	2.87382e-46	8.82973e-46	down
BLT_RS0116525	1356	hypothetical protein	237	28.2198	829	96.2373	-1.76989	1.57763e-74	6.06767e-74	down
BLT_RS0113160	699	phosphoadenosine phosphosulfate reductase	7386	1706.07	587	132.193	3.68996	0	0	up
BLT_RS22570	3021	hypothetical protein	1640	87.6513	5480	285.548	-1.70388	0	0	down
BLT_RS0110400	420	hypothetical protein	1996	767.32	89	33.3572	4.52376	0	0	up
BLT_RS0113865	1803	DNA primase	2114	189.31	854	74.5608	1.34426	6.6844e-129	3.5273e-128	up
BLT_RS0110455	1371	hypothetical protein	386	45.4585	171	19.6339	1.2112	1.80196e-21	4.01347e-21	up
BLT_RS0109685	1857	hypothetical protein	265	23.0409	661	56.0323	-1.28206	7.93604e-38	2.24458e-37	down
BLT_RS0114260	789	hypothetical protein	634	129.741	1556	310.443	-1.25869	3.21703e-84	1.3353e-83	down
BLT_RS0103475	495	AsnC family transcriptional regulator	591	192.773	236	75.0508	1.36097	5.00673e-38	1.42354e-37	up
BLT_RS0114340	1224	hypothetical protein	219	28.8887	12	1.54329	4.22642	9.05661e-50	2.85469e-49	up
BLT_RS0106760	1314	SpoIVB peptidase	745	91.5432	280	33.5437	1.44841	5.36047e-52	1.73012e-51	up
BLT_RS0109885	879	hypothetical protein	697	128.029	109	19.5203	2.71343	4.80484e-108	2.27747e-107	up
BLT_RS0120070	2028	cell division protein FtsH	10870	865.419	4174	323.991	1.41744	0	0	up
BLT_RS0108295	270	flagellar biosynthesis protein FliQ	160	95.68	72	41.9776	1.1886	1.58243e-09	2.66184e-09	up
BLT_RS0104910	582	GTP-binding protein	1069	296.565	406	109.812	1.43331	1.07507e-72	4.06031e-72	up
BLT_RS0111200	1110	hypothetical protein	6532	950.141	2073	293.985	1.6924	0	0	up
BLT_RS0117935	4413	hypothetical protein	744	27.221	362	12.9129	1.07591	2.99578e-33	7.97115e-33	up
BLT_RS0118100	948	2-hydroxyhepta-2,4-diene-1,7-dioate isomerase	208	35.4258	32	5.31362	2.73704	8.52803e-34	2.2885e-33	up
BLT_RS0102795	999	C4-dicarboxylate ABC transporter substrate-binding protein	645	104.246	133	20.9573	2.31447	5.73969e-84	2.37194e-83	up
BLT_RS0105580	1194	ornithine--oxo-acid aminotransferase	719	97.2276	2037	268.556	-1.46579	6.75652e-138	3.74337e-137	down
BLT_RS0102450	708	chemotaxis protein CheY	218	49.7151	463	102.943	-1.05009	4.54405e-20	9.87597e-20	down
BLT_RS0120325	987	hypothetical protein	1114	182.236	2970	473.683	-1.37812	1.4763e-182	9.68708e-182	down
BLT_RS0101100	2262	hypothetical protein	1004	71.6648	4760	331.255	-2.20861	0	0	down
BLT_RS22660	840	hypothetical protein	814	156.462	133	24.9242	2.6502	9.16533e-123	4.6921e-122	up
BLT_RS0102560	1080	UDP-2,4-diacetamido-2,4, 6-trideoxy-beta-L-altropyranose hydrolase	206	30.797	74	10.7859	1.51364	1.6675e-16	3.37345e-16	up
BLT_RS0112670	828	UDP-diphosphatase	946	184.47	370	70.3429	1.39091	9.20427e-62	3.24255e-61	up
BLT_RS0102585	168	carbon storage regulator	424	407.494	68	63.716	2.67705	1.52121e-65	5.48712e-65	up
BLT_RS0115625	1530	carboxylase	669	70.5992	325	33.438	1.07816	3.64949e-30	9.3734e-30	up
BLT_RS0104905	2325	peptidase	4063	282.156	939	63.5757	2.14994	0	0	up
BLT_RS0114425	252	hypothetical protein	149	95.4665	2	1.24933	6.25576	3.55259e-37	9.91414e-37	up
BLT_RS0103485	783	hypothetical protein	481	99.1855	234	47.0438	1.07612	4.39622e-22	9.90856e-22	up
BLT_RS0101770	357	hypothetical protein	651	294.427	29	12.7873	4.52513	5.06945e-149	2.92462e-148	up
BLT_RS0117625	1362	MATE family efflux transporter	101	11.9732	455	52.5876	-2.13492	5.49949e-53	1.78876e-52	down
BLT_RS0116265	471	hypothetical protein	140	47.9924	55	18.3819	1.38452	2.05726e-10	3.55323e-10	up
BLT_RS0104410	663	hypothetical protein	795	193.606	375	89.0362	1.12066	1.03437e-37	2.91681e-37	up
BLT_RS0119285	618	flavoprotein	15279	3991.83	2557	651.315	2.61562	0	0	up
BLT_RS22325	1926	hypothetical protein	421	35.2932	66	5.39432	2.70988	6.38947e-66	2.3158e-65	up
BLT_RS0112070	1155	30S ribosomal protein S1	6678	933.533	2063	281.168	1.73127	0	0	up
BLT_RS0115915	1692	hypothetical protein	886	84.547	367	34.144	1.30812	6.39586e-53	2.07852e-52	up
BLT_RS0111730	702	hypothetical protein	154	35.42	575	128.938	-1.86404	5.75169e-56	1.92728e-55	down
BLT_RS0107045	918	cupin	468	82.313	226	38.7538	1.08678	7.49808e-22	1.68094e-21	up
BLT_RS0116615	1107	hypothetical protein	4518	658.967	155	22.0411	4.90194	0	0	up
BLT_RS0107030	279	hypothetical protein	107	61.922	15	8.46322	2.87117	5.21823e-19	1.10671e-18	up
BLT_RS0112270	384	hypothetical protein	1112	467.561	3213	1317.13	-1.49417	1.52362e-222	1.16842e-221	down
BLT_RS0116250	186	hypothetical protein	24	20.8336	70	59.2426	-1.50772	2.23107e-06	3.37523e-06	down
BLT_RS0119985	1506	lysyl-tRNA synthetase	1041	111.607	478	49.9634	1.15948	1.74384e-51	5.58532e-51	up
BLT_RS0108675	261	stage V sporulation protein S	1173	725.642	5228	3153.14	-2.11946	0	0	down
BLT_RS0100225	1452	hypothetical protein	142	15.7902	569	61.6871	-1.96594	2.36652e-59	8.19163e-59	down
BLT_RS0117685	1008	rod shape-determining protein MreB	378	60.5475	1383	215.978	-1.83475	3.36981e-129	1.78321e-128	down
BLT_RS0105960	1167	hypothetical protein	1845	255.265	387	52.2022	2.28981	1.67192e-233	1.32803e-232	up
BLT_RS0114270	273	transcriptional regulator	1181	698.477	3268	1884.38	-1.4318	1.7162e-212	1.25005e-211	down
BLT_RS0119545	1302	guanine permease	167	20.7095	439	53.0765	-1.35778	6.55844e-28	1.62156e-27	down
BLT_RS0104850	522	acetolactate synthase	9626	2977.42	1115	336.243	3.14649	0	0	up
BLT_RS0111455	570	hypothetical protein	42	11.8971	160	44.1869	-1.89302	4.42971e-17	9.03909e-17	down
BLT_RS0109345	1284	hypothetical protein	218	27.413	108	13.2406	1.04989	1.83526e-10	3.1749e-10	up
BLT_RS0116710	843	energy-coupling factor ABC transporter ATP-binding protein	106	20.3022	54	10.0836	1.00963	1.67406e-05	2.45385e-05	up
BLT_RS0114215	231	hypothetical protein	17	11.8823	128	87.2261	-2.87594	6.10578e-22	1.37044e-21	down
BLT_RS0111195	984	pyruvate dehydrogenase	5297	869.16	1971	315.312	1.46284	0	0	up
BLT_RS0101635	270	hypothetical protein	39	23.322	188	109.608	-2.23259	4.22842e-24	9.90306e-24	down
BLT_RS0108710	1917	hypothetical protein	897	75.5502	341	28.0015	1.43193	3.29213e-61	1.15546e-60	up
BLT_RS0100925	1143	acyl-CoA dehydrogenase	7655	1081.34	1372	188.954	2.51672	0	0	up
BLT_RS0103695	852	hypothetical protein	3687	698.713	726	134.136	2.381	0	0	up
BLT_RS0107160	954	hypothetical protein	257	43.496	9041	1491.82	-5.10005	0	0	down
BLT_RS0117215	732	hypothetical protein	171	37.7181	84	18.0641	1.06213	1.20232e-08	1.97405e-08	up
BLT_RS0115055	1101	tRNA (5-methylaminomethyl-2-thiouridylate)-methyltransferase	1475	216.307	589	84.2125	1.36097	3.25416e-92	1.42933e-91	up
BLT_RS0106510	384	transcriptional regulator	408	171.551	179	73.3788	1.22521	5.48162e-23	1.25804e-22	up
BLT_RS0119760	198	hypothetical protein	113	92.1464	29	23.0559	1.99879	1.23905e-13	2.34449e-13	up
BLT_RS0115195	1140	queuine tRNA-ribosyltransferase	851	120.529	346	47.7771	1.33498	1.82935e-52	5.92966e-52	up
BLT_RS0100570	733	DNA topoisomerase III	433	95.3782	1468	315.261	-1.72482	5.88096e-126	3.06476e-125	down
BLT_RS21780	2022	hypothetical protein	1013	80.8897	411	31.997	1.33802	2.55942e-62	9.08438e-62	up
BLT_RS0112075	588	hypothetical protein	1821	500.032	625	167.321	1.5794	4.39624e-141	2.46464e-140	up
BLT_RS0103365	1215	NADH dehydrogenase	1563	207.705	3243	420.165	-1.01642	1.39114e-123	7.1509e-123	down
BLT_RS0114955	693	5'-methylthioadenosine/S-adenosylhomocysteine nucleosidase	115	26.7935	401	91.0877	-1.76537	7.59603e-37	2.10734e-36	down
BLT_RS0120605	204	50S ribosomal protein L29	1748	1383.49	484	373.477	1.88922	1.45364e-173	9.28016e-173	up
BLT_RS0106750	450	arginine repressor	759	272.329	290	101.446	1.42464	1.09946e-51	3.53345e-51	up
BLT_RS0117320	783	hypothetical protein	396	81.658	974	195.815	-1.26183	1.32012e-53	4.32736e-53	down
BLT_RS0100340	1677	hypothetical protein	486	46.7916	78	7.32167	2.67601	7.94036e-75	3.05704e-74	up
BLT_RS0116425	1328	hypothetical protein	184	22.371	38	4.50437	2.31223	3.62894e-25	8.61673e-25	up
BLT_RS0101850	576	polysaccharide deacetylase	3823	1071.63	646	176.546	2.60169	0	0	up
BLT_RS0118615	387	amino acid-binding protein	525	219.035	257	104.537	1.06714	1.18287e-23	2.74137e-23	up
BLT_RS0113935	2145	membrane protein	1225	92.2091	454	33.3179	1.46861	4.8517e-86	2.04074e-85	up
BLT_RS0101495	303	hypothetical protein	133	70.8719	57	29.6129	1.25899	8.5033e-09	1.40468e-08	up
BLT_RS0106735	222	hypothetical protein	222	161.46	581	411.976	-1.35138	3.82235e-36	1.05038e-35	down
BLT_RS0121000	1227	hypothetical protein	496	65.2683	1162	149.077	-1.1916	2.8216e-58	9.65176e-58	down
BLT_RS0102410	1020	peptide ABC transporter substrate-binding protein	6300	997.253	311	47.9964	4.37696	0	0	up
BLT_RS0111615	1143	PBS lyase	2421	341.99	1039	143.093	1.257	5.55224e-133	3.00123e-132	up
BLT_RS0102830	1416	FAD-binding protein	987	112.543	281	31.2386	1.84908	4.35698e-96	1.95468e-95	up
BLT_RS0120640	624	50S ribosomal protein L4	4207	1088.56	1282	323.409	1.75099	0	0	up
BLT_RS0117680	402	hypothetical protein	198	79.5251	801	313.657	-1.97971	1.52434e-83	6.26508e-83	down
BLT_RS0101300	288	stage III sporulation protein D	815	456.909	247	135.006	1.75888	1.66594e-74	6.40081e-74	up
BLT_RS0118540	564	RNA polymerase sigma factor SigW	572	163.75	1994	556.538	-1.76498	7.23809e-176	4.66029e-175	down
BLT_RS0112325	1470	ABC transporter ATP-binding protein	336	36.9052	785	84.0623	-1.18764	9.67551e-40	2.80382e-39	down
BLT_RS0116610	363	(2Fe-2S) ferredoxin	1312	583.569	29	12.5759	5.53617	0	0	up
BLT_RS0111150	1029	branched-chain amino acid ABC transporter permease	498	78.141	182	27.8423	1.4888	9.60782e-37	2.6596e-36	up
BLT_RS0116630	1029	hypothetical protein	2942	461.628	257	39.3157	3.55355	0	0	up
BLT_RS0110065	1332	hypothetical protein	251	30.4253	536	63.3446	-1.05795	3.03612e-23	6.99345e-23	down
BLT_RS0103515	1353	glucose-6-phosphate isomerase	374	44.6312	2352	273.645	-2.61618	0	0	down
BLT_RS0104420	978	acetyl-CoA carboxylase subunit alpha	1703	281.152	727	117.016	1.26465	5.3889e-95	2.40619e-94	up
BLT_RS0116260	204	hypothetical protein	67	53.0285	21	16.2046	1.71037	2.83002e-07	4.42873e-07	up
BLT_RS0112560	294	hypothetical protein	1187	651.881	3941	2110.12	-1.69465	0	0	down
BLT_RS0111210	495	hypothetical protein	2763	901.241	37	11.7664	6.25916	0	0	up
BLT_RS0119790	231	hypothetical protein	770	538.2	153	104.263	2.36792	1.4536e-102	6.73762e-102	up
BLT_RS0112815	582	hypothetical protein	144	39.9489	44	11.9009	1.74709	2.1704e-14	4.18229e-14	up
BLT_RS0100890	989	hypothetical protein	3665	598.333	582	92.6351	2.69132	0	0	up
BLT_RS0111015	771	short-chain dehydrogenase	178	37.2761	63	12.8628	1.53505	9.73063e-15	1.88953e-14	up
BLT_RS0113480	777	ABC transporter permease	383	79.5871	72	14.5868	2.44787	6.29925e-54	2.07936e-53	up
BLT_RS0102170	1152	hypothetical protein	412	57.7444	3536	483.179	-3.06481	0	0	down
BLT_RS0102725	225	hypothetical protein	810	581.256	6237	4363.57	-2.90826	0	0	down
BLT_RS0101785	573	hypothetical protein	2178	613.717	5	1.37361	8.80346	0	0	up
BLT_RS0108935	1053	hypothetical protein	724	111.013	346	51.7245	1.10181	1.30681e-33	3.49192e-33	up
BLT_RS0101405	1485	hypothetical protein	2788	303.132	447	47.3838	2.67748	0	0	up
BLT_RS0109230	300	HesB/YadR/YfhF family protein	150	80.73	35	18.3652	2.13613	4.99071e-19	1.05905e-18	up
BLT_RS0101160	369	NADH:ubiquinone oxidoreductase subunit A	1091	477.379	128	54.605	3.12803	4.63435e-193	3.17916e-192	up
BLT_RS0113870	513	hypothetical protein	509	160.201	160	49.0966	1.70619	2.56027e-45	7.77145e-45	up
BLT_RS0106485	831	octanoyltransferase	211	40.9965	520	98.5034	-1.26467	1.60899e-29	4.09629e-29	down
BLT_RS0109530	1461	aldehyde dehydrogenase	1565	172.953	292	31.4616	2.45872	1.54133e-215	1.14477e-214	up
BLT_RS0108950	762	Pn transporter membrane channel protein	1255	265.922	225	46.4811	2.51629	8.05336e-178	5.22084e-177	up
BLT_RS0118880	420	arsenate reductase	2004	770.395	373	139.8	2.46223	7.38346e-276	6.41884e-275	up
BLT_RS0102010	474	hypothetical protein	719	244.915	28	9.29883	4.71909	4.11825e-167	2.55562e-166	up
BLT_RS0103190	495	hypothetical protein	462	150.696	1235	392.745	-1.38195	2.31319e-77	9.05361e-77	down
BLT_RS0111995	567	GTP cyclohydrolase I	445	126.719	159	44.1431	1.52137	4.94048e-34	1.32956e-33	up
BLT_RS0106035	939	3-oxoacyl-ACP synthase	6318	1086.37	1042	174.683	2.63671	0	0	up
BLT_RS0106875	1053	hypothetical protein	778	119.293	2461	367.902	-1.62481	6.53996e-193	4.47827e-192	down
BLT_RS0117505	606	hypothetical protein	2540	676.747	175	45.4584	3.896	0	0	up
BLT_RS0110670	765	3-ketoacyl-ACP reductase	462	97.5092	195	40.1256	1.28101	1.46249e-27	3.59712e-27	up
BLT_RS0114900	627	cyclase	707	182.061	2367	594.264	-1.70668	6.4463e-199	4.47094e-198	down
BLT_RS0114690	246	hypothetical protein	304	199.528	6	3.83941	5.69956	1.82362e-74	6.99951e-74	up
BLT_RS0107585	1230	multidrug transporter	2551	334.865	528	67.5737	2.30905	0	0	up
BLT_RS0110430	1359	tetracycline resistance protein TetA	305	36.2364	119	13.784	1.39444	3.94645e-21	8.73823e-21	up
BLT_RS0101640	510	hypothetical protein	342	108.273	814	251.248	-1.21444	1.45932e-42	4.34572e-42	down
BLT_RS0115665	1146	acyl-CoA dehydrogenase	1058	149.062	513	70.4663	1.0809	6.8025e-47	2.10376e-46	up
BLT_RS0102685	981	peptide chain release factor 2	2770	455.907	22123	3549.96	-2.96099	0	0	down
BLT_RS0113720	492	hypothetical protein	9800	3216.07	3969	1269.89	1.3406	0	0	up
BLT_RS0117565	303	urease subunit gamma	20	10.6574	85	44.1596	-2.05087	1.08401e-10	1.88825e-10	down
BLT_RS0103525	180	hypothetical protein	58	52.026	392	342.817	-2.72013	3.03066e-60	1.05583e-59	down
BLT_RS0107830	1326	uracil transporter	994	121.034	2967	352.227	-1.54109	3.74404e-215	2.76985e-214	down
BLT_RS0118330	1428	amidophosphoribosyltransferase	298	33.694	1017	112.109	-1.73434	1.60932e-88	6.89212e-88	down
BLT_RS0120350	351	hypothetical protein	540	248.4	138	61.89	2.00489	2.77851e-59	9.60889e-59	up
BLT_RS0109865	1557	hypothetical protein	1632	169.237	580	58.6392	1.52911	6.88573e-121	3.49662e-120	up
BLT_RS0107375	627	hypothetical protein	412	106.095	161	40.421	1.39218	6.5554e-28	1.62187e-27	up
BLT_RS0100390	1194	hypothetical protein	414	55.9836	53	6.98747	3.00216	9.92203e-72	3.70285e-71	up
BLT_RS0110745	924	hypothetical protein	920	160.761	237	40.3762	1.99334	5.97903e-99	2.70815e-98	up
BLT_RS0117435	714	hypothetical protein	94	21.2566	22	4.85035	2.13175	1.83891e-12	3.35991e-12	up
BLT_RS0101875	732	hypothetical protein	561	123.742	55	11.8277	3.38709	2.66377e-107	1.25787e-106	up
BLT_RS0108065	999	signal recognition particle-docking protein FtsY	275	44.446	795	125.271	-1.49493	1.52485e-56	5.14142e-56	down
BLT_RS0108700	564	spore coat protein	3050	873.144	1257	350.837	1.31542	4.38487e-179	2.85736e-178	up
BLT_RS0100485	528	hypothetical protein	602	184.089	1437	428.422	-1.21863	3.73113e-74	1.42341e-73	down
BLT_RS0107120	333	hypothetical protein	125	60.6081	332	156.943	-1.37266	7.76019e-22	1.73867e-21	down
BLT_RS0107735	705	hypothetical protein	343	78.5543	134	29.9202	1.39257	1.61421e-23	3.73644e-23	up
BLT_RS21545	347	acetyl-CoA carboxylase	69	32.1059	31	14.0631	1.19092	7.19398e-05	0.000102697	up
BLT_RS0114070	591	co-chaperone GrpE	1559	425.916	296	78.8411	2.43355	3.25166e-212	2.36388e-211	up
BLT_RS0120390	759	hypothetical protein	476	101.258	3515	729.008	-2.8479	0	0	down
BLT_RS21675	243	hypothetical protein	106	70.4311	45	29.1511	1.27266	2.17061e-07	3.40671e-07	up
BLT_RS0103015	387	hypothetical protein	774	322.92	44	17.8974	4.17335	5.94403e-170	3.71921e-169	up
BLT_RS0116985	1743	multidrug ABC transporter ATP-binding protein	1022	94.6713	3049	275.365	-1.54035	6.90287e-221	5.21935e-220	down
BLT_RS0103065	372	hypothetical protein	614	266.496	53	22.4275	3.57077	3.4156e-122	1.74621e-121	up
BLT_RS0119740	1641	molecular chaperone GroEL	1640	161.362	16695	1601.5	-3.31105	0	0	down
BLT_RS0114315	855	1,4-dihydroxy-6-naphthoate synthase	349	65.9059	145	26.6963	1.30377	9.25995e-22	2.07346e-21	up
BLT_RS0109990	612	hypothetical protein	1927	508.388	225	57.8735	3.13496	0	0	up
BLT_RS0119845	636	transcriptional regulator	1872	475.241	126	31.1862	3.92968	0	0	up
BLT_RS0116465	936	ribose ABC transporter permease	585	100.913	173	29.095	1.79426	1.8722e-55	6.25116e-55	up
BLT_RS0117750	714	hypothetical protein	1106	250.105	4375	964.558	-1.94734	0	0	down
BLT_RS22215	1074	hypothetical protein	2087	313.75	65	9.52704	5.04144	0	0	up
BLT_RS0102865	1275	histidinol dehydrogenase	507	64.2041	1167	144.082	-1.16615	1.32653e-56	4.47676e-56	down
BLT_RS21720	792	hypothetical protein	1449	295.398	571	113.491	1.38009	1.57405e-92	6.93796e-92	up
BLT_RS0117210	459	hypothetical protein	62	21.8094	12	4.11545	2.40583	7.33585e-10	1.24508e-09	up
BLT_RS0108090	417	hypothetical protein	120	46.4633	18	6.79493	2.77356	1.8987e-20	4.14333e-20	up
BLT_RS0120425	633	hypothetical protein	2364	602.988	232	57.6943	3.38563	0	0	up
BLT_RS0120370	1020	hypothetical protein	1753	277.49	811	125.161	1.14865	3.35955e-84	1.39292e-83	up
BLT_RS0106715	846	bifunctional 5,10-methylene-tetrahydrofolate dehydrogenase/5,10-methylene-tetrahydrofolate cyclohydrolase	418	79.7758	181	33.6788	1.24411	4.80414e-24	1.12305e-23	up
BLT_RS0116280	1557	hypothetical protein	1457	151.09	297	30.0273	2.33106	8.66464e-189	5.8274e-188	up
BLT_RS0114250	363	monovalent cation/H+ antiporter subunit G	308	136.996	644	279.272	-1.02753	2.18063e-26	5.25384e-26	down
BLT_RS0102770	502	diacylglyceryl transferase	103	33.1283	40	12.5431	1.40117	3.74858e-08	6.05842e-08	up
BLT_RS21505	1011	hypothetical protein	1014	161.939	413	64.3054	1.33244	5.4466e-62	1.92236e-61	up
BLT_RS0119115	2016	PTS glucose transporter subunit IIABC	7539	603.793	59505	4646.35	-2.94397	0	0	down
BLT_RS0107385	627	hypothetical protein	351	90.3867	162	40.6721	1.15207	2.77948e-18	5.81964e-18	up
BLT_RS0116590	552	hypothetical protein	1659	485.258	4883	1392.5	-1.52086	0	0	down
BLT_RS0105610	2919	hypothetical protein	1007	55.7007	353	19.0366	1.54892	1.00698e-76	3.91281e-76	up
BLT_RS0120770	690	hypothetical protein	704	164.736	226	51.5594	1.67585	1.739e-60	6.06401e-60	up
BLT_RS0100620	948	hypothetical protein	498	84.8176	1026	170.368	-1.00622	1.04558e-39	3.0276e-39	down
BLT_RS0116170	243	hypothetical protein	82	54.4845	3	1.94341	4.80919	1.00594e-20	2.20536e-20	up
BLT_RS0110800	189	hypothetical protein	57	48.6943	18	14.992	1.69956	2.42087e-06	3.65943e-06	up
BLT_RS0111935	375	hypothetical protein	203	87.4037	1215	510.028	-2.54481	4.54646e-170	2.85421e-169	down
BLT_RS0118395	1098	chalcone synthase	205	30.1451	86	12.3295	1.28981	3.21987e-13	6.03207e-13	up
BLT_RS0104700	594	TetR family transcriptional regulator	3863	1050.03	648	171.726	2.61225	0	0	up
BLT_RS0114480	378	hypothetical protein	258	110.203	2	0.832889	7.04782	6.61064e-61	2.31587e-60	up
BLT_RS0105765	798	hypothetical protein	216	43.7035	71	14.0057	1.64174	3.39866e-19	7.22837e-19	up
BLT_RS22250	293	hypothetical protein	42	23.1444	94	50.502	-1.12568	1.22222e-05	1.79923e-05	down
BLT_RS0106720	1353	exodeoxyribonuclease VII large subunit	582	69.4529	296	34.4384	1.01202	5.19047e-24	1.21186e-23	up
BLT_RS0116440	1071	hypothetical protein	252	37.9906	40	5.87921	2.69195	6.64079e-40	1.92885e-39	up
BLT_RS0103025	657	hypothetical protein	315	77.4123	104	24.9182	1.63536	4.09157e-27	9.979e-27	up
BLT_RS0103310	240	nitrogen-fixing protein NifU	22155	14904.8	9502	6232.36	1.25792	0	0	up
BLT_RS0107105	366	hypothetical protein	1878	828.475	5830	2507.47	-1.5977	0	0	down
BLT_RS0101290	348	hypothetical protein	363	168.42	88	39.8063	2.08099	2.43106e-42	7.22805e-42	up
BLT_RS0111810	729	bacillithiol biosynthesis deacetylase BshB1	586	129.788	180	38.8681	1.7395	2.77472e-53	9.05625e-53	up
BLT_RS0114350	228	hypothetical protein	58	41.0732	16	11.0467	1.89458	2.969e-07	4.64044e-07	up
BLT_RS0120550	441	50S ribosomal protein L15	3180	1164.27	1617	577.192	1.0123	1.80631e-123	9.2724e-123	up
BLT_RS0100935	3264	methylmalonyl-CoA mutase	13884	686.799	4707	227.009	1.59714	0	0	up
BLT_RS0116380	1755	5-oxoprolinase	1649	151.708	673	60.3652	1.32951	2.60956e-99	1.1834e-98	up
BLT_RS0111965	864	hypothetical protein	707	132.121	200	36.4389	1.85831	8.04784e-70	2.98276e-69	up
BLT_RS0101665	183	hypothetical protein	733	646.722	88	75.6973	3.09483	4.05415e-129	2.14234e-128	up
BLT_RS0114765	810	thymidylate synthase	702	139.932	214	41.5889	1.75046	5.15557e-64	1.84554e-63	up
BLT_RS0102990	2346	ribonuclease R	2512	172.885	611	40.9979	2.07619	4.97835e-281	4.4196e-280	up
BLT_RS0120630	831	50S ribosomal protein L2	6358	1235.33	2545	482.098	1.3575	0	0	up
BLT_RS0108925	195	hypothetical protein	21	17.388	1271	1026.03	-5.88284	2.31999e-297	2.20487e-296	down
BLT_RS0116270	525	hypothetical protein	343	105.487	93	27.8851	1.9195	2.94203e-36	8.09649e-36	up
BLT_RS0113380	444	hypothetical protein	111	40.365	48	17.0179	1.24605	1.80836e-07	2.8524e-07	up
BLT_RS0116975	928	hypothetical protein	349	60.7215	1769	300.074	-2.30504	3.80824e-220	2.86225e-219	down
BLT_RS0103570	336	hypothetical protein	266	127.823	792	371.052	-1.53748	1.21926e-58	4.18585e-58	down
BLT_RS0111060	342	phenylacetic acid degradation protein	311	146.825	103	47.4089	1.63087	1.08251e-26	2.61984e-26	up
BLT_RS0100905	598	hypothetical protein	1326	358.02	295	77.655	2.20489	6.76935e-161	4.10623e-160	up
BLT_RS0115480	297	hypothetical protein	450	244.636	960	508.819	-1.05651	3.15157e-40	9.18923e-40	down
BLT_RS22185	180	hypothetical protein	69	61.893	317	277.227	-2.16322	4.82249e-38	1.37219e-37	down
BLT_RS0103095	1785	acyl-CoA dehydrogenase	26062	2357.41	7903	696.951	1.75807	0	0	up
BLT_RS0112625	1143	phosphopentomutase	328	46.3332	86	11.8441	1.96788	7.42193e-36	2.03362e-35	up
BLT_RS0117700	495	hypothetical protein	510	166.353	3894	1238.34	-2.89609	0	0	down
BLT_RS0114560	1281	terminase	793	99.9515	9	1.10597	6.49785	2.23508e-188	1.50053e-187	up
BLT_RS0109270	669	7-cyano-7-deazaguanine synthase	496	119.707	219	51.5308	1.216	2.74618e-27	6.71506e-27	up
BLT_RS0119555	2175	hypothetical protein	1963	145.722	554	40.0958	1.8617	6.97114e-191	4.7052e-190	up
BLT_RS0109445	486	hypothetical protein	88	29.2356	16	5.18242	2.49603	6.66696e-14	1.26786e-13	up
BLT_RS0116125	1356	hypothetical protein	578	68.8229	2876	333.87	-2.27833	0	0	down
BLT_RS0117375	1368	MATE family efflux transporter	1389	163.939	441	50.7459	1.69179	4.55827e-119	2.28095e-118	up
BLT_RS0104860	1111	2-isopropylmalate synthase	10888	1582.34	1318	186.745	3.08291	0	0	up
BLT_RS0101990	570	hypothetical protein	366	103.674	1003	276.997	-1.41781	1.32611e-65	4.78795e-65	down
BLT_RS0108435	276	hypothetical protein	180	105.3	23	13.118	3.00489	3.29243e-32	8.63863e-32	up
BLT_RS0109250	207	hypothetical protein	200	156	507	385.555	-1.30539	3.40096e-30	8.74698e-30	down
BLT_RS0108035	741	3-oxoacyl-ACP reductase	838	182.596	191	40.5755	2.16997	1.94341e-100	8.8343e-100	up
BLT_RS0112035	630	hypothetical protein	259	66.378	75	18.74	1.82459	4.65833e-26	1.11735e-25	up
BLT_RS0117005	222	hypothetical protein	10	7.27297	53	37.5813	-2.3694	2.51379e-08	4.08993e-08	down
BLT_RS0115875	720	hypothetical protein	177	39.6923	21	4.5913	3.11188	1.05331e-32	2.78301e-32	up
BLT_RS0107055	678	hypothetical protein	831	197.896	156	36.2196	2.4499	6.29962e-115	3.08681e-114	up
BLT_RS0112445	894	hypothetical protein	2034	367.349	793	139.632	1.39552	2.86103e-131	1.5377e-130	up
BLT_RS0115460	180	hypothetical protein	264	236.808	103	90.0769	1.39449	1.67503e-18	3.52082e-18	up
BLT_RS0101550	195	hypothetical protein	394	326.232	196	158.223	1.04394	1.46321e-17	3.02337e-17	up
BLT_RS0102420	948	peptide ABC transporter permease	3155	537.349	89	14.7785	5.18429	0	0	up
BLT_RS0107300	1410	dihydrolipoamide dehydrogenase	2497	285.933	8962	1000.54	-1.80703	0	0	down
BLT_RS0106835	1596	hypothetical protein	812	82.1463	8072	796.154	-3.27678	0	0	down
BLT_RS0114080	1149	radical SAM protein	702	98.6466	2205	302.091	-1.61464	1.61665e-171	1.02343e-170	down
BLT_RS0115110	1254	hypothetical protein	1186	152.705	338	42.4295	1.8476	6.00932e-115	2.9484e-114	up
BLT_RS0114720	225	hypothetical protein	211	151.414	43	30.0839	2.33143	6.92396e-29	1.74743e-28	up
BLT_RS0120025	1419	aminobenzoate synthetase	7087	806.39	931	103.28	2.96492	0	0	up
BLT_RS0113280	831	hypothetical protein	2924	568.122	1041	197.196	1.52657	1.73603e-214	1.27931e-213	up
BLT_RS0116775	687	hypothetical protein	127	29.8478	274	62.7831	-1.07275	6.88918e-13	1.27354e-12	down
BLT_RS0114945	1491	MFS transporter	3440	372.517	8224	868.269	-1.22084	0	0	down
BLT_RS0111815	423	methylglyoxal synthase	396	151.154	106	39.447	1.93803	4.16652e-42	1.23587e-41	up
BLT_RS0118930	1689	hypothetical protein	774	73.9906	288	26.8418	1.46286	9.88291e-55	3.27953e-54	up
BLT_RS0113995	1017	hypothetical protein	469	74.459	132	20.4316	1.86565	3.62611e-47	1.12511e-46	up
BLT_RS0112245	1515	ATP-dependent DNA helicase	619	65.9695	288	29.9246	1.14047	1.53857e-30	3.9679e-30	up
BLT_RS0103345	1095	radical SAM protein	3454	509.3	1188	170.786	1.57633	4.88039e-265	4.14723e-264	up
BLT_RS0106470	1344	glycine dehydrogenase	247	29.6731	1030	120.639	-2.02347	6.4055e-110	3.06311e-109	down
BLT_RS0101800	228	hypothetical protein	638	451.805	7	4.83295	6.54665	1.15099e-151	6.71203e-151	up
BLT_RS22450	237	hypothetical protein	5957	4058.3	2260	1501.1	1.43486	0	0	up
BLT_RS0113135	210	hypothetical protein	4761	3660.53	1176	881.529	2.05397	0	0	up
BLT_RS0119675	966	hypothetical protein	941	157.281	72	11.7329	3.74472	1.00708e-192	6.88351e-192	up
BLT_RS0110100	735	hypothetical protein	1098	241.202	357	76.4592	1.65748	7.13144e-92	3.12871e-91	up
BLT_RS0104565	504	translation initiation factor IF-3	6268	2008	3116	973.23	1.04491	2.92571e-254	2.41547e-253	up
BLT_RS22345	612	hypothetical protein	102	26.91	46	11.8319	1.18546	1.51674e-06	2.30846e-06	up
BLT_RS0108270	993	flagellar motor switch protein FliM	643	104.551	233	36.9365	1.50108	1.7268e-47	5.37559e-47	up
BLT_RS0121065	248	capsular biosynthesis protein	53	34.5056	202	128.218	-1.8937	3.66912e-21	8.12893e-21	down
BLT_RS0110120	792	membrane protein	4958	1010.76	11932	2371.57	-1.23041	0	0	down
BLT_RS0113200	435	hypothetical protein	346	128.426	158	57.1764	1.16744	2.13469e-18	4.47952e-18	up
BLT_RS0116990	528	hypothetical protein	2687	821.673	6596	1966.51	-1.259	0	0	down
BLT_RS0117915	297	hypothetical protein	46	25.0073	4	2.12008	3.56016	1.30226e-10	2.26321e-10	up
BLT_RS21475	705	hypothetical protein	75	17.1766	252	56.2678	-1.71187	7.70397e-23	1.76057e-22	down
BLT_RS0114030	174	30S ribosomal protein S21	2628	2438.6	34290	31021.8	-3.66916	0	0	down
BLT_RS22510	183	hypothetical protein	68	59.9961	28	24.0855	1.3167	2.01534e-05	2.94724e-05	up
BLT_RS0113075	399	glyoxalase	835	337.893	376	148.342	1.18764	3.361e-43	1.00803e-42	up
BLT_RS0109260	1065	hypothetical protein	876	132.807	267	39.4648	1.75069	1.95582e-79	7.78408e-79	up
BLT_RS0117890	1053	fatty acid desaturase	2302	352.973	874	130.657	1.43378	2.11589e-154	1.2513e-153	up
BLT_RS0111930	1509	anthranilate synthase component I	12171	1302.27	6170	643.642	1.0167	0	0	up
BLT_RS0101940	273	transposase	8	4.73143	38	21.9114	-2.21133	6.01511e-06	8.94914e-06	down
BLT_RS0100855	444	hypothetical protein	111	40.365	37	13.118	1.62156	1.98193e-10	3.42705e-10	up
BLT_RS0105070	591	hypothetical protein	813	222.11	298	79.3739	1.48454	1.25009e-58	4.28782e-58	up
BLT_RS0102955	1008	glyceraldehyde-3-phosphate dehydrogenase	5617	899.723	16912	2641.09	-1.55358	0	0	down
BLT_RS0114075	1032	HrcA family transcriptional regulator	8714	1363.34	29120	4441.81	-1.70401	0	0	down
BLT_RS0109220	300	HesB/YadR/YfhF family protein	113	60.8166	30	15.7416	1.94988	3.03794e-13	5.69689e-13	up
BLT_RS0114530	684	hypothetical protein	1102	260.13	10	2.3014	6.82058	3.94158e-257	3.26848e-256	up
BLT_RS0103045	524	hypothetical protein	332	102.299	74	22.2305	2.20218	1.29573e-41	3.82834e-41	up
BLT_RS0106495	662	hypothetical protein	152	37.0724	329	78.2324	-1.07742	2.84917e-15	5.60476e-15	down
BLT_RS0102375	1365	hypothetical protein	993	117.458	371	42.7848	1.45697	2.70776e-69	9.99644e-69	up
BLT_RS0114835	615	hypothetical protein	444	116.566	22	5.63114	4.37158	1.08686e-100	4.95257e-100	up
BLT_RS0109100	243	hypothetical protein	58	38.5378	360	233.209	-2.59728	7.27291e-53	2.35947e-52	down
BLT_RS0102470	417	membrane protein	160	61.9511	69	26.0472	1.25	3.37821e-10	5.79099e-10	up
BLT_RS0118190	954	iron ABC transporter permease	576	97.4853	1383	228.204	-1.22706	3.37359e-72	1.26526e-71	down
BLT_RS0118585	312	hypothetical protein	71	36.7425	10	5.04538	2.86441	4.25001e-13	7.91084e-13	up
BLT_RS0115200	1029	S-adenosylmethionine:tRNA ribosyltransferase-isomerase	782	122.703	332	50.7892	1.27258	5.0075e-45	1.51753e-44	up
BLT_RS0101825	534	hypothetical protein	6550	1980.46	19	5.60094	8.46595	0	0	up
BLT_RS21620	291	hypothetical protein	134	74.3493	32	17.3103	2.10268	7.42664e-17	1.51218e-16	up
BLT_RS0113420	237	hypothetical protein	61	41.5572	15	9.96303	2.06044	2.78413e-08	4.51613e-08	up
BLT_RS0100680	1269	ammonium transporter	1349	171.639	476	59.0465	1.53945	3.06499e-101	1.40513e-100	up
BLT_RS0114605	300	hypothetical protein	77	41.4414	4	2.09888	4.30338	9.88388e-19	2.08335e-18	up
BLT_RS0109955	993	hypothetical protein	129	20.9752	28	4.43872	2.24047	1.68831e-17	3.48087e-17	up
BLT_RS0100575	342	hypothetical protein	215	101.503	1419	653.138	-2.68587	3.33551e-210	2.4109e-209	down
BLT_RS22085	808	DNA methyltransferase	1170	233.797	568	110.659	1.07914	1.54342e-51	4.94759e-51	up
BLT_RS0121100	228	hypothetical protein	35	24.7855	0.5	0.34521	6.16588	6.35602e-10	1.08219e-09	up
BLT_RS0111630	351	hypothetical protein	1068	491.28	453	203.161	1.27392	6.14387e-61	2.15435e-60	up
BLT_RS0120075	540	hypoxanthine phosphoribosyltransferase	151	45.149	60	17.4907	1.36811	6.0557e-11	1.06172e-10	up
BLT_RS0114960	210	hypothetical protein	25	19.2214	284	212.886	-3.4693	6.28073e-55	2.08786e-54	down
BLT_RS0113595	783	hypothetical protein	258	53.2014	737	148.168	-1.4777	1.105e-51	3.54824e-51	down
BLT_RS0113070	786	hypothetical protein	1099	225.756	422	84.5159	1.41747	1.78454e-73	6.78054e-73	up
BLT_RS0105905	576	hypothetical protein	292	81.8513	1382	377.689	-2.20612	1.4352e-163	8.79062e-163	down
BLT_RS0116400	1239	3-oxoacyl-ACP synthase	563	73.3672	237	30.111	1.28484	2.2808e-33	6.08161e-33	up
BLT_RS0104075	516	hypothetical protein	66	20.6519	28	8.54195	1.27363	4.25688e-05	6.13024e-05	up
BLT_RS0120060	726	Fe-S oxidoreductase	495	110.086	77	16.6956	2.72109	1.6413e-77	6.43055e-77	up
BLT_RS0110130	534	thiol-disulfide oxidoreductase	988	298.731	43	12.6758	4.5587	8.42388e-226	6.5804e-225	up
BLT_RS0117350	189	hypothetical protein	30	25.6286	8	6.66311	1.94349	0.000177252	0.000248707	up
BLT_RS0104705	774	hypothetical protein	7829	1633.17	916	186.296	3.132	0	0	up
BLT_RS0118675	801	hypothetical protein	203	40.9193	18	3.53744	3.53201	2.69076e-41	7.92524e-41	up
BLT_RS0104205	603	30S ribosomal protein S4	2555	684.13	5356	1398.21	-1.03124	1.15209e-207	8.2483e-207	down
BLT_RS0108605	579	CDP-diacylglycerol--glycerol-3-phosphate 3-phosphatidyltransferase	1014	282.764	452	122.888	1.20226	4.56198e-53	1.4851e-52	up
BLT_RS22320	1125	transposase	170	24.3984	19	2.65858	3.19806	3.17863e-32	8.34585e-32	up
BLT_RS21155	316	NADH:ubiquinone oxidoreductase subunit M	26	13.2847	58	28.8928	-1.12095	0.000617416	0.000840069	down
BLT_RS0112250	1053	hypothetical protein	362	55.5067	67	10.016	2.47035	1.37418e-51	4.40883e-51	up
BLT_RS0112015	744	hypothetical protein	917	199.004	2671	565.132	-1.50579	1.84729e-187	1.23359e-186	down
BLT_RS0101535	432	hypothetical protein	754	281.808	156	56.8446	2.30961	1.35769e-97	6.12746e-97	up
BLT_RS0106575	498	hypothetical protein	2321	752.508	5679	1795.11	-1.25429	1.5243e-300	1.46714e-299	down
BLT_RS0107445	1329	phosphate starvation protein PhoH	1515	184.057	3969	470.116	-1.35286	1.44443e-236	1.15462e-235	down
BLT_RS0108495	207	hypothetical protein	20	15.6	75	57.0348	-1.8703	1.16284e-08	1.91256e-08	down
BLT_RS0100760	1236	sodium:dicarboxylate symporter	1288	168.253	337	42.92	1.97091	9.59963e-136	5.24919e-135	up
BLT_RS0107145	1587	malate synthase	109841	11175.1	3854	382.282	4.86951	0	0	up
BLT_RS0105005	1392	hypothetical protein	57	6.61151	275	31.0987	-2.2338	1.65514e-34	4.4766e-34	down
BLT_RS0101845	330	rhodanese	2892	1414.98	285	135.95	3.37963	0	0	up
BLT_RS0116310	771	membrane protein	106	22.1981	48	9.80021	1.17955	1.04495e-06	1.59749e-06	up
BLT_RS0119565	957	magnesium chelatase	1982	334.393	745	122.544	1.44824	3.32546e-135	1.81053e-134	up
BLT_RS0111140	741	hypothetical protein	672	146.425	221	46.9486	1.64101	3.62305e-56	1.21617e-55	up
BLT_RS0111865	501	menaquinol-cytochrome C reductase iron-sulfur subunit	1629	524.987	370	116.255	2.17498	6.45542e-194	4.44458e-193	up
BLT_RS0111725	657	endonuclease III	332	81.5902	1219	292.07	-1.83985	1.5493e-114	7.56211e-114	down
BLT_RS22360	265	hypothetical protein	70	42.6498	7	4.15816	3.35852	9.55188e-15	1.85578e-14	up
BLT_RS0109875	429	hypothetical protein	638	240.12	62	22.7501	3.39981	3.95125e-122	2.01733e-121	up
BLT_RS0111880	1272	hypothetical protein	2003	254.249	878	108.657	1.22647	2.97059e-106	1.40101e-105	up
BLT_RS0112085	588	hypothetical protein	1918	526.667	665	178.03	1.56477	1.59799e-146	9.09383e-146	up
BLT_RS0107345	684	two-component system response regulator	243	57.3608	47	10.8166	2.40682	3.2831e-34	8.85428e-34	up
BLT_RS0113395	1008	hypothetical protein	307	49.1748	1375	214.729	-2.12653	1.53413e-155	9.12978e-155	down
BLT_RS0107185	1056	ABC transporter substrate-binding protein	831	127.058	11784	1756.62	-3.78924	0	0	down
BLT_RS0119120	204	hypothetical protein	134	106.057	709	547.098	-2.36696	3.15942e-92	1.38933e-91	down
BLT_RS0100385	801	hypothetical protein	272	54.8279	130	25.5482	1.10169	1.312e-13	2.48129e-13	up
BLT_RS0108410	1263	metalloprotease RseP	1544	197.383	756	94.2252	1.06681	3.22309e-66	1.17155e-65	up
BLT_RS0109440	1497	hypothetical protein	411	44.3287	164	17.2453	1.36204	5.48345e-27	1.33478e-26	up
BLT_RS0103180	303	hypothetical protein	1423	758.276	6028	3131.69	-2.04615	0	0	down
BLT_RS0104930	936	porphobilinogen deaminase	3738	644.805	181	30.4405	4.4048	0	0	up
BLT_RS0104845	1725	acetolactate synthase	26005	2434.07	2573	234.801	3.37386	0	0	up
BLT_RS0110350	765	hypothetical protein	692	146.053	1484	305.366	-1.06405	6.52816e-62	2.30194e-61	down
BLT_RS0107980	645	ribulose-phosphate 3-epimerase	220	55.0716	628	153.267	-1.47667	2.94804e-44	8.87706e-44	down
BLT_RS0110910	477	hypothetical protein	43	14.5551	348	114.844	-2.98008	1.03743e-58	3.56487e-58	down
BLT_RS0116475	891	hypothetical protein	980	177.588	423	74.7328	1.24872	2.13141e-54	7.06042e-54	up
BLT_RS0119915	462	alanine acetyltransferase	165	57.6643	24	8.17745	2.81796	6.15674e-28	1.52424e-27	up
BLT_RS0110215	777	hypothetical protein	118	24.5203	53	10.7375	1.19132	2.07204e-07	3.25471e-07	up
BLT_RS0109540	804	hypothetical protein	136	27.3116	44	8.6148	1.66463	7.16684e-13	1.32422e-12	up
BLT_RS0118435	201	hypothetical protein	13382	10749.5	35414	27735	-1.36743	0	0	down
BLT_RS0111285	315	cell division protein GpsB	602	308.568	1235	617.17	-1.00008	5.57113e-47	1.72435e-46	down
BLT_RS0114760	384	hypothetical protein	367	154.312	93	38.1242	2.01707	3.60799e-41	1.06185e-40	up
BLT_RS0102405	1035	peptide ABC transporter ATP-binding protein	6422	1001.83	333	50.6469	4.30602	0	0	up
BLT_RS0100440	219	hypothetical protein	213	157.036	475	341.427	-1.12048	1.1813e-22	2.68658e-22	down
BLT_RS0112110	875	sporulation protein	139	25.6491	49	8.81529	1.54083	6.83809e-12	1.23033e-11	up
BLT_RS0103645	972	hypothetical protein	1171	194.516	2490	403.257	-1.05181	9.87152e-101	4.50911e-100	down
BLT_RS0108020	561	DeoR family transcriptional regulator	225	64.7567	75	21.0449	1.62156	1.31763e-19	2.83109e-19	up
BLT_RS0115225	873	hypothetical protein	10095	1867.06	2489	448.807	2.0566	0	0	up
BLT_RS0104425	960	6-phosphofructokinase	122	20.5189	35	5.73912	1.83805	3.27122e-13	6.12218e-13	up
BLT_RS0103280	1296	homoserine dehydrogenase	11050	1376.65	1445	175.514	2.9715	0	0	up
BLT_RS0107295	1302	branched-chain alpha-keto acid dehydrogenase subunit E2	2712	336.313	11147	1347.71	-2.00263	0	0	down
BLT_RS0109435	1044	hypothetical protein	592	91.5559	198	29.8547	1.61669	1.11744e-48	3.50757e-48	up
BLT_RS0106265	633	GTP pyrophosphokinase	100	25.5071	47	11.6881	1.12586	4.89587e-06	7.3273e-06	up
BLT_RS0100455	1023	hypothetical protein	607	95.8028	305	46.9324	1.02948	1.22094e-25	2.92113e-25	up
BLT_RS0110285	771	hypothetical protein	153	32.0407	38	7.7585	2.04606	2.00105e-18	4.20377e-18	up
BLT_RS0119025	891	hypothetical protein	177	32.0746	78	13.7805	1.2188	9.44267e-11	1.64788e-10	up
BLT_RS0102960	1185	phosphoglycerate kinase	778	106.005	301	39.985	1.4066	5.84023e-52	1.88174e-51	up
BLT_RS0116395	978	hypothetical protein	58	9.57534	139	22.373	-1.22436	1.29596e-08	2.12408e-08	down
BLT_RS0111530	864	hypothetical protein	328	61.295	143	26.0538	1.23428	5.4218e-19	1.14859e-18	up
BLT_RS0100140	1020	membrane protein	149	23.5858	314	48.4594	-1.03886	6.9435e-14	1.31979e-13	down
BLT_RS0104220	639	hypothetical protein	3356	847.981	16879	4158.1	-2.29382	0	0	down
BLT_RS21450	2385	phage-like protein	664	44.9516	1592	105.076	-1.22499	1.30365e-82	5.35219e-82	down
BLT_RS0116385	2043	5-oxoprolinase	2094	165.491	241	18.5694	3.15575	0	0	up
BLT_RS0100915	852	3-hydroxybutyryl-CoA dehydrogenase	3087	585.008	661	122.127	2.26008	0	0	up
BLT_RS0111940	1086	hypothetical protein	679	100.95	2988	433.111	-2.1011	0	0	down
BLT_RS0115630	783	hypothetical protein	303	62.4807	134	26.9396	1.21368	3.05241e-17	6.2557e-17	up
BLT_RS0107205	1149	galactonate dehydratase	76	10.6797	303	41.5118	-1.95865	2.84951e-32	7.4869e-32	down
BLT_RS0120730	660	DNA-directed RNA polymerase sigma-70 factor	1466	358.637	224	53.426	2.74691	6.28221e-228	4.91759e-227	up
BLT_RS0114870	1134	carboxypeptidase	1805	256.998	4340	602.456	-1.2291	5.22774e-223	4.01716e-222	down
BLT_RS0112685	297	hypothetical protein	1039	564.838	110	58.3022	3.27622	1.30993e-191	8.8732e-191	up
BLT_RS0106925	1191	hypothetical protein	216	29.2824	110	14.5388	1.01012	7.89194e-10	1.33826e-09	up
BLT_RS22625	504	hypothetical protein	231	74.0025	912	284.848	-1.94455	1.10225e-92	4.87549e-92	down
BLT_RS0115135	2184	GTP pyrophosphokinase	2919	215.798	854	61.5537	1.80976	3.25975e-272	2.8016e-271	up
BLT_RS0120600	261	30S ribosomal protein S17	2040	1261.99	533	321.466	1.97296	4.18149e-214	3.07539e-213	up
BLT_RS0103000	399	hypothetical protein	751	303.901	2523	995.389	-1.71166	9.39309e-213	6.85496e-212	down
BLT_RS0105975	957	hypothetical protein	1234	208.194	3762	618.807	-1.57156	4.36089e-280	3.82643e-279	down
BLT_RS0111830	873	hypothetical protein	520	96.1732	49	8.83549	3.44425	6.05939e-101	2.77116e-100	up
BLT_RS0114015	720	hypothetical protein	441	98.8943	64	13.9925	2.82123	7.70718e-72	2.88198e-71	up
BLT_RS0103055	678	hypothetical protein	731	174.082	121	28.0934	2.63146	1.29261e-109	6.17346e-109	up
BLT_RS0107230	255	hypothetical protein	186	117.771	761	469.779	-1.996	2.64709e-80	1.0625e-79	down
BLT_RS0110475	915	hypothetical protein	144	25.4101	55	9.46216	1.42516	4.40242e-11	7.75459e-11	up
BLT_RS0117450	1152	hypothetical protein	277	38.8233	101	13.8012	1.49213	3.11269e-21	6.90834e-21	up
BLT_RS0106170	183	hypothetical protein	744	656.428	5032	4328.51	-2.72116	0	0	down
BLT_RS0118740	1083	hypothetical protein	435	64.8524	180	26.1633	1.30961	6.75272e-27	1.64268e-26	up
BLT_RS0117590	627	urease accessory protein UreG	577	148.584	1875	470.741	-1.66365	1.87266e-152	1.09374e-151	down
BLT_RS0118875	1296	arylsulfatase	5004	623.415	387	47.0061	3.72927	0	0	up
BLT_RS0112770	336	hypothetical protein	1089	523.304	551	258.143	1.01948	5.63471e-44	1.69266e-43	up
BLT_RS0113015	222	hypothetical protein	34	24.7281	9	6.38173	1.95413	6.17505e-05	8.84192e-05	up
BLT_RS0117495	870	hypothetical protein	8458	1569.69	928	167.91	3.22472	0	0	up
BLT_RS0107480	900	protoheme IX farnesyltransferase	1466	263	240	41.9776	2.64737	3.19339e-219	2.3906e-218	up
BLT_RS0113535	219	hypothetical protein	132	97.3184	61	43.8464	1.15025	9.25764e-08	1.47567e-07	up
BLT_RS0108885	1137	alanine dehydrogenase	1381	196.109	9384	1299.2	-2.72789	0	0	down
BLT_RS0108095	519	hypothetical protein	224	69.686	51	15.4686	2.17153	3.65502e-28	9.07861e-28	up
BLT_RS0101165	516	NADH dehydrogenase subunit B	370	115.776	96	29.2867	1.98301	1.28777e-40	3.77819e-40	up
BLT_RS0102100	699	hypothetical protein	203	46.8904	1017	229.03	-2.28817	2.55082e-126	1.33116e-125	down
BLT_RS0100775	978	peptide ABC transporter ATP-binding protein	553	91.2959	277	44.5851	1.03399	1.16323e-23	2.69753e-23	up
BLT_RS0108105	345	50S ribosomal protein L19	2248	1052.06	7243	3304.82	-1.65135	0	0	down
BLT_RS0110580	3660	hypothetical protein	6883	303.642	24617	1058.77	-1.80195	0	0	down
BLT_RS0113965	1344	membrane protein	7233	868.929	16918	1981.52	-1.1893	0	0	down
BLT_RS0103285	1065	threonine synthase	11872	1799.86	2989	441.799	2.02642	0	0	up
BLT_RS0107175	909	hypothetical protein	264	46.8927	4303	745.171	-3.99014	0	0	down
BLT_RS0112655	546	hypothetical protein	285	84.2786	88	25.3711	1.73198	1.21756e-26	2.9429e-26	up
BLT_RS0113410	1221	nucleoside transporter NupC	455	60.1673	204	26.3005	1.19389	1.70876e-24	4.03704e-24	up
BLT_RS0116115	1227	hypothetical protein	463	60.9258	1172	150.36	-1.30329	2.39093e-67	8.72435e-67	down
BLT_RS0109430	573	phenolic acid decarboxylase subunit B	234	65.9366	66	18.1317	1.86257	2.50334e-24	5.88848e-24	up
BLT_RS0103020	381	hypothetical protein	272	115.268	19	7.85014	3.87613	2.2177e-58	7.5998e-58	up
BLT_RS0104870	1095	3-isopropylmalate dehydrogenase	15679	2311.9	1056	151.809	3.92875	0	0	up
BLT_RS0100610	189	hypothetical protein	175	149.5	59	49.1404	1.60516	2.17538e-15	4.29723e-15	up
BLT_RS21765	765	hypothetical protein	1085	228.999	4600	946.553	-2.04734	0	0	down
BLT_RS0102970	1533	phosphoglyceromutase	1113	117.224	2470	253.632	-1.11346	1.93114e-109	9.21137e-109	down
BLT_RS0115215	615	Holliday junction DNA helicase RuvA	263	69.0471	77	19.709	1.80873	3.85419e-26	9.25055e-26	up
BLT_RS0102035	753	hypothetical protein	408	87.4843	92	19.2328	2.18546	2.8206e-50	8.95801e-50	up
BLT_RS0108425	471	ribosome maturation protein RimP	198	67.8749	45	15.0397	2.1741	4.04189e-25	9.5852e-25	up
BLT_RS0109945	1248	hypothetical protein	167	21.6056	58	7.3158	1.56232	3.0328e-14	5.81736e-14	up
BLT_RS0116620	1278	hypothetical protein	3799	479.958	424	52.2256	3.20008	0	0	up
BLT_RS0110310	435	hypothetical protein	9524	3535.05	4599	1664.27	1.08684	0	0	up
BLT_RS0111745	480	hypothetical protein	150	50.4563	55	18.0372	1.48405	4.13256e-12	7.4675e-12	up
BLT_RS0108930	1887	selenocysteine-specific translation elongation factor	1058	90.5271	298	24.8595	1.86455	5.22826e-104	2.44136e-103	up
BLT_RS0100560	2181	hypothetical protein	1924	142.434	4893	353.157	-1.31001	3.30907e-277	2.89007e-276	down
BLT_RS0110725	228	hypothetical protein	48	33.9916	19	13.118	1.37363	0.000215629	0.000300876	up
BLT_RS0104805	798	glutamate racemase	4651	941.041	1148	226.458	2.05501	0	0	up
BLT_RS21985	459	hypothetical protein	70	24.6235	181	62.0747	-1.33397	4.00537e-12	7.24462e-12	down
BLT_RS0117515	780	two-component system response regulator	2947	610.029	372	75.0753	3.02247	0	0	up
BLT_RS0118360	1299	adenylosuccinate lyase	430	53.4471	1877	227.459	-2.08942	5.93756e-207	4.23486e-206	down
BLT_RS0111480	939	hypothetical protein	197	33.8739	95	15.926	1.08879	4.31964e-10	7.38804e-10	up
BLT_RS0101125	519	ATP synthase F0F1 subunit B	907	282.166	232	70.367	2.00357	3.20135e-98	1.44655e-97	up
BLT_RS0113065	699	hypothetical protein	1153	266.328	302	68.0109	1.96937	1.33647e-121	6.805e-121	up
BLT_RS0110625	1074	hypothetical protein	296	44.4992	75	10.9927	2.01723	1.53708e-33	4.10432e-33	up
BLT_RS0118335	1539	hypothetical protein	230	24.1298	620	63.4164	-1.39404	3.08924e-40	9.01448e-40	down
BLT_RS0113580	435	hypothetical protein	3707	1375.94	10086	3649.88	-1.40743	0	0	down
BLT_RS0107340	969	hypothetical protein	259	43.156	54	8.77241	2.29852	1.64131e-34	4.44237e-34	up
BLT_RS0110415	1056	hypothetical protein	5541	847.207	1287	191.851	2.14273	0	0	up
BLT_RS0102070	498	hypothetical protein	113	36.6365	32	10.1151	1.85677	1.69616e-12	3.10209e-12	up
BLT_RS0106815	984	2-oxoisovalerate dehydrogenase subunit beta	221	36.2629	710	113.583	-1.64718	4.1938e-58	1.43196e-57	down
BLT_RS0118700	195	hypothetical protein	183	151.524	18	14.5307	3.38237	3.51316e-36	9.66118e-36	up
BLT_RS0104590	396	sigma-w pathway protein	1432	583.866	4879	1939.48	-1.73196	0	0	down
BLT_RS21855	252	hypothetical protein	406	260.13	879	549.082	-1.07779	3.82627e-38	1.0912e-37	down
BLT_RS0118450	201	hypothetical protein	13500	10844.3	35619	27895.5	-1.36309	0	0	down
BLT_RS0119535	921	2-keto-3-deoxygluconate kinase	397	69.5979	22	3.76021	4.21016	1.51262e-88	6.48536e-88	up
BLT_RS22105	294	hypothetical protein	22451	12329.7	50148	26850.7	-1.12282	0	0	down
BLT_RS0110060	1179	phosphoribosylglycinamide formyltransferase	161	22.0484	1096	146.334	-2.73052	1.1604e-165	7.14226e-165	down
BLT_RS0115695	1737	phosphoglucomutase	355	32.9985	729	66.0658	-1.0015	1.70982e-28	4.27228e-28	down
BLT_RS0119815	1332	cytochrome D ubiquinol oxidase subunit I	3776	457.713	146	17.2543	4.72941	0	0	up
BLT_RS0114885	423	hypothetical protein	684	261.084	147	54.7048	2.25478	3.17007e-86	1.33788e-85	up
BLT_RS0105770	1764	radical SAM protein	708	64.8037	302	26.9499	1.2658	1.32043e-40	3.86799e-40	up
BLT_RS0102750	360	membrane protein	1139	510.842	3245	1418.93	-1.47386	2.93868e-220	2.2131e-219	down
BLT_RS0107780	681	YggS family pyridoxal phosphate enzyme	882	209.116	148	34.2108	2.61178	8.61518e-131	4.60412e-130	up
BLT_RS0103425	627	hypothetical protein	713	183.606	5705	1432.31	-2.96366	0	0	down
BLT_RS0111990	219	transcription attenuation protein MtrB	223	164.409	101	72.5982	1.17928	1.42891e-12	2.61713e-12	up
BLT_RS0120650	309	30S ribosomal protein S10	2470	1290.64	624	317.888	2.02149	4.39522e-267	3.74337e-266	up
BLT_RS0100015	2502	DNA gyrase subunit A	4104	264.841	2006	126.21	1.0693	1.66936e-173	1.06214e-172	up
BLT_RS0101345	657	hypothetical protein	121	29.7362	55	13.1779	1.1741	2.01623e-07	3.16968e-07	up
BLT_RS0112635	228	membrane protein	46	32.5753	12	8.28505	1.97519	2.69613e-06	4.07225e-06	up
BLT_RS0115890	1077	hypothetical protein	331	49.6224	28	4.09252	3.59993	3.75532e-67	1.36897e-66	up
BLT_RS0112900	516	hypothetical protein	241	75.4106	67	20.4397	1.8834	2.32036e-25	5.52698e-25	up
BLT_RS22290	1113	hypothetical protein	5400	783.364	426	60.2508	3.70063	0	0	up
BLT_RS0101815	714	hypothetical protein	4720	1067.35	9	1.98423	9.07124	0	0	up
BLT_RS0118690	1086	hypothetical protein	891	132.469	21	3.04395	5.44356	8.79797e-214	6.45812e-213	up
BLT_RS0106150	537	phosphohydrolase	9156	2752.94	22408	6568.67	-1.25463	0	0	down
BLT_RS0105935	198	hypothetical protein	878	715.969	326	259.18	1.46594	4.95835e-62	1.75167e-61	up
BLT_RS21245	957	hypothetical protein	55	9.27931	140	23.0285	-1.31133	1.73398e-09	2.91158e-09	down
BLT_RS0108445	2154	translation initiation factor IF-2	1359	101.868	503	36.7596	1.47051	2.00671e-95	8.97077e-95	up
BLT_RS0102730	1989	excinuclease ABC subunit B	1767	143.439	795	62.9189	1.18887	1.54171e-89	6.67071e-89	up
BLT_RS0109560	1470	2-hydroxymuconic semialdehyde dehydrogenase	1892	207.811	278	29.7698	2.80335	9.17475e-300	8.80823e-299	up
BLT_RS0102425	927	peptide ABC transporter permease	2634	458.776	264	44.8304	3.35524	0	0	up
BLT_RS0107790	255	membrane protein	542	343.182	221	136.427	1.33084	6.83355e-34	1.83509e-33	up
BLT_RS0113465	591	hypothetical protein	77	21.0362	21	5.59346	1.91106	2.85123e-09	4.76848e-09	up
BLT_RS0110155	792	hypothetical protein	2082	424.444	189	37.5652	3.49811	0	0	up
BLT_RS0101655	813	membrane protein	3589	712.768	544	105.331	2.7585	0	0	up
BLT_RS0120395	585	KinB activator protein	1177	324.852	524	141.002	1.20407	1.89178e-61	6.65209e-61	up
BLT_RS0114380	270	hypothetical protein	2714	1622.97	1115	650.07	1.31997	2.03207e-160	1.22672e-159	up
BLT_RS0106645	669	hypothetical protein	581	140.222	288	67.7665	1.04906	2.4773e-25	5.89707e-25	up
BLT_RS0110420	756	exodeoxyribonuclease III	4514	964.062	1833	381.671	1.3368	1.1688e-270	9.99978e-270	up
BLT_RS0110525	651	hypothetical protein	252	62.5007	578	139.764	-1.16105	1.02616e-28	2.57428e-28	down
BLT_RS0101140	858	F0F1 ATP synthase subunit gamma	2250	423.409	989	181.45	1.22248	1.61605e-118	8.05462e-118	up
BLT_RS0108875	423	hypothetical protein	285	108.785	724	269.431	-1.30843	1.55249e-42	4.6195e-42	down
BLT_RS0112350	717	two-component system response regulator	1372	308.958	319	70.0358	2.14125	1.63422e-160	9.89713e-160	up
BLT_RS0113530	957	hypothetical protein	1346	227.09	365	60.0385	1.91931	6.16486e-137	3.39067e-136	up
BLT_RS0107860	930	dihydroorotate dehydrogenase	128	22.2225	1124	190.253	-3.09783	3.34193e-192	2.27191e-191	down
BLT_RS0108250	393	hypothetical protein	396	162.693	190	76.1044	1.0961	5.67988e-19	1.20259e-18	up
BLT_RS0100525	1197	hypothetical protein	180	24.2797	33	4.33979	2.48405	1.14562e-26	2.77078e-26	up
BLT_RS0103195	756	hypothetical protein	202	43.1414	425	88.4944	-1.03651	3.42098e-18	7.15881e-18	down
BLT_RS0115010	426	Holliday junction DNA helicase	2895	1097.25	694	256.448	2.09715	0	0	up
BLT_RS0119670	1209	cystathionine gamma-synthase	1069	142.763	154	20.0513	2.83186	4.9788e-172	3.15714e-171	up
BLT_RS21610	513	GTP-binding protein TypA	392	123.377	51	15.6495	2.97888	1.60033e-67	5.84517e-67	up
BLT_RS0106790	258	hypothetical protein	146	91.3689	533	325.204	-1.83157	7.9781e-51	2.54449e-50	down
BLT_RS0100535	1542	hypothetical protein	294	30.7842	75	7.65642	2.00745	3.99492e-33	1.06147e-32	up
BLT_RS0104295	1008	hypothetical protein	678	108.601	1581	246.899	-1.18488	6.11294e-78	2.40001e-77	down
BLT_RS21995	216	hypothetical protein	148	110.63	377	274.749	-1.31237	4.76264e-23	1.0937e-22	down
BLT_RS0118420	2430	nitrite reductase	323	21.4616	101	6.5428	1.71377	1.48134e-29	3.77386e-29	up
BLT_RS0104600	1086	peptidase M28	768	114.182	2347	340.198	-1.57504	4.56445e-176	2.94387e-175	down
BLT_RS0114525	909	phage capsid protein	1427	253.469	72	12.4686	4.34544	0	0	up
BLT_RS0120000	528	hypothetical protein	823	251.67	105	31.3043	3.0071	6.55419e-141	3.66899e-140	up
BLT_RS0106565	399	hypothetical protein	1966	795.565	7213	2845.72	-1.83874	0	0	down
BLT_RS0110275	249	hypothetical protein	32	20.7499	4	2.52877	3.0366	5.54833e-07	8.58648e-07	up
BLT_RS0116600	1137	hypothetical protein	909	129.083	49	6.78398	4.25002	3.48627e-201	2.43587e-200	up
BLT_RS0105640	360	chemotaxis protein CheY	982	440.427	494	216.01	1.02781	2.43943e-40	7.13487e-40	up
BLT_RS0102140	1125	hypothetical protein	53	7.60656	161	22.528	-1.5664	1.59239e-13	3.00405e-13	down
BLT_RS0112665	531	hypothetical protein	1307	397.417	127	37.6494	3.39995	4.61269e-248	3.7752e-247	up
BLT_RS0104165	645	hypothetical protein	1313	328.678	509	124.224	1.40372	3.63058e-86	1.52882e-85	up
BLT_RS0119680	1221	X-Pro dipeptidase	1080	142.815	137	17.6626	3.01538	9.30358e-185	6.13679e-184	up
BLT_RS0115765	762	hypothetical protein	370	78.3992	881	181.999	-1.21502	5.90957e-46	1.81128e-45	down
BLT_RS0108315	1146	hypothetical protein	1436	202.318	4332	595.049	-1.55638	0	0	down
BLT_RS0109740	915	hypothetical protein	837	147.696	310	53.3322	1.46955	1.9771e-59	6.84994e-59	up
BLT_RS0109420	312	hypothetical protein	42	21.735	16	8.07261	1.42891	0.000362522	0.00050029	up
BLT_RS0100365	249	hypothetical protein	33	21.3983	84	53.1042	-1.31133	3.10433e-06	4.67757e-06	down
BLT_RS0116650	1206	hypothetical protein	53	7.09567	167	21.7981	-1.61919	1.38237e-14	2.67471e-14	down
BLT_RS0107520	351	hypothetical protein	3234	1487.64	977	438.163	1.76348	7.48834e-291	6.92488e-290	up
BLT_RS0113520	1119	hypothetical protein	4040	582.93	14408	2026.85	-1.79785	0	0	down
BLT_RS0112960	207	hypothetical protein	76	59.28	215	163.5	-1.46367	5.00963e-16	1.00326e-15	down
BLT_RS0100035	222	hypothetical protein	135	98.1852	48	34.0359	1.52845	1.79689e-11	3.21312e-11	up
BLT_RS0108595	888	hypothetical protein	653	118.731	3390	600.946	-2.33953	0	0	down
BLT_RS0100195	1287	adenylosuccinate synthetase	615	77.1546	3154	385.773	-2.32193	0	0	down
BLT_RS0102915	897	glmZ(sRNA)-inactivating NTPase	3305	594.9	551	96.6959	2.62112	0	0	up
BLT_RS0110005	1329	hypothetical protein	2806	340.901	1087	128.752	1.40476	3.97669e-182	2.60036e-181	up
BLT_RS0112490	1206	3,4-dihydroxy-2-butanone 4-phosphate synthase	13959	1868.84	2869	374.483	2.31917	0	0	up
BLT_RS0104215	483	hypothetical protein	2595	867.472	14312	4664.47	-2.42682	0	0	down
BLT_RS0120420	501	hypothetical protein	1532	493.726	152	47.7589	3.36987	2.73887e-288	2.49608e-287	up
BLT_RS0107725	789	hypothetical protein	560	114.598	158	31.5231	1.8621	7.8295e-56	2.62118e-55	up
BLT_RS0100985	1287	UDP-N-acetylglucosamine 1-carboxyvinyltransferase	1021	128.089	489	59.8107	1.09867	1.753e-46	5.39925e-46	up
BLT_RS0106740	1890	1-deoxy-D-xylulose-5-phosphate synthase	4135	353.247	2028	168.91	1.06443	1.62177e-173	1.0336e-172	up
BLT_RS0115050	669	hypothetical protein	124	29.9268	31	7.29431	2.0366	3.83681e-15	7.53973e-15	up
BLT_RS0120595	369	50S ribosomal protein L14	2703	1182.73	806	343.841	1.78231	5.16785e-247	4.22041e-246	up
BLT_RS0111825	342	nucleotide pyrophosphohydrolase	88	41.5453	8	3.68224	3.49603	1.0784e-18	2.2718e-18	up
BLT_RS0107820	921	RNA pseudouridine synthase	376	65.9164	108	18.4592	1.8363	2.20258e-37	6.15807e-37	up
BLT_RS0111145	783	hypothetical protein	419	86.4007	131	26.3365	1.71398	7.63949e-38	2.16395e-37	up
BLT_RS0108795	972	hypothetical protein	2545	422.753	522	84.5382	2.32214	0	0	up
BLT_RS0112265	1626	3-phosphoglycerate dehydrogenase	15971	1585.9	5069	490.739	1.69228	0	0	up
BLT_RS0103435	603	biotin biosynthesis protein BioC	355	95.0552	2212	577.453	-2.60286	0	0	down
BLT_RS0102360	1299	hypothetical protein	1706	212.048	5953	721.399	-1.7664	0	0	down
BLT_RS0114565	834	terminase	349	67.5654	4	0.754992	6.48368	4.69846e-84	1.94378e-83	up
BLT_RS0105355	405	holin	44	17.5413	176	68.4079	-1.9634	1.75152e-19	3.7591e-19	down
BLT_RS0110480	825	S-adenosylmethionine decarboxylase	156	30.5306	388	74.0332	-1.27792	8.79735e-23	2.00801e-22	down
BLT_RS0120775	1095	hypothetical protein	4074	600.72	1281	184.155	1.70577	0	0	up
BLT_RS0112065	781	hypothetical protein	1246	257.592	441	88.8866	1.53505	2.84858e-93	1.26444e-92	up
BLT_RS0111035	1818	hypothetical protein	507	45.0276	163	14.1137	1.67371	5.53347e-44	1.66357e-43	up
BLT_RS0113800	897	endonuclease IV	1200	216	587	103.014	1.0682	5.65404e-52	1.82331e-51	up
BLT_RS0106560	996	hypothetical protein	378	61.277	2108	333.165	-2.44282	2.61396e-280	2.29894e-279	down
BLT_RS0107180	1539	hypothetical protein	680	71.3404	11031	1128.3	-3.98329	0	0	down
BLT_RS0107460	282	hypothetical protein	1128	645.84	3721	2077.11	-1.68533	4.53417e-306	4.43198e-305	down
BLT_RS0106475	1467	glycine dehydrogenase subunit 2	382	42.0434	2445	262.36	-2.64159	0	0	down
BLT_RS0117445	1425	hypothetical protein	611	69.2295	205	22.6458	1.61214	5.48283e-50	1.73401e-49	up
BLT_RS0106820	1293	branched-chain alpha-keto acid dehydrogenase subunit E2	593	74.0493	2753	335.163	-2.17831	0	0	down
BLT_RS0104895	1275	ATP-dependent Clp protease ATP-binding subunit ClpX	14814	1875.98	4418	545.462	1.78209	0	0	up
BLT_RS0117860	897	hypothetical protein	499	89.82	166	29.1316	1.62445	1.39931e-41	4.13114e-41	up
BLT_RS0105575	651	hypothetical protein	213	52.8279	1848	446.858	-3.08044	0	0	down
BLT_RS0109565	780	2-keto-4-pentenoate hydratase	1095	226.665	161	32.4923	2.80239	2.61012e-174	1.67483e-173	up
BLT_RS0102530	819	hypothetical protein	1303	256.877	9756	1875.15	-2.86786	0	0	down
BLT_RS0104175	1716	acetyl-CoA synthetase	34387	3235.5	11429	1048.43	1.62576	0	0	up
BLT_RS0103900	1206	S-adenosylmethionine synthetase	8518	1140.4	17729	2314.12	-1.02093	0	0	down
BLT_RS0111740	1185	aspartate aminotransferase	579	78.8906	2004	266.212	-1.75465	2.55512e-175	1.64233e-174	down
BLT_RS0117525	1560	hypothetical protein	2744	284.004	357	36.024	2.97888	0	0	up
BLT_RS0110115	306	hypothetical protein	1350	712.324	4182	2151.35	-1.59464	0	0	down
BLT_RS0111710	2628	hypothetical protein	6749	414.648	26170	1567.57	-1.91857	0	0	down
BLT_RS0112525	411	Rrf2 family transcriptional regulator	424	166.567	150	57.4511	1.5357	6.20112e-33	1.64419e-32	up
BLT_RS0116355	441	hypothetical protein	80	29.2898	25	8.92381	1.71467	1.90521e-08	3.1078e-08	up
BLT_RS0101380	1515	hypothetical protein	3518	374.928	865	89.8777	2.06058	0	0	up
BLT_RS0109910	885	hypothetical protein	155	28.2783	51	9.07143	1.64029	3.42817e-14	6.56906e-14	up
BLT_RS0113790	1131	two-component system sensor histidine kinase	5137	733.351	984	136.956	2.42079	0	0	up
BLT_RS0111820	801	4-hydroxy-tetrahydrodipicolinate reductase	471	94.9409	118	23.1899	2.03354	7.15617e-53	2.3236e-52	up
BLT_RS0110915	1203	cobalamin biosynthesis protein CobW	103	13.8241	253	33.1058	-1.2599	4.28907e-15	8.4197e-15	down
BLT_RS22540	209	hypothetical protein	106	81.8888	310	233.488	-1.51161	1.94858e-23	4.49939e-23	down
BLT_RS0108510	1050	aspartate-semialdehyde dehydrogenase	3879	596.48	1776	266.258	1.16365	8.85319e-188	5.93305e-187	up
BLT_RS0119785	267	hypothetical protein	504	304.778	239	140.908	1.11301	2.88369e-24	6.7747e-24	up
BLT_RS0113145	606	adenylylsulfate kinase	15308	4078.6	801	208.07	4.29294	0	0	up
BLT_RS0106590	558	elongation factor P	505	146.124	1770	499.33	-1.7728	2.75791e-157	1.65168e-156	down
BLT_RS0119735	231	hypothetical protein	19	13.2803	96	65.4196	-2.30044	1.72178e-13	3.2449e-13	down
BLT_RS0102415	1659	hypothetical protein	30106	2930.03	1722	163.394	4.16449	0	0	up
BLT_RS0107785	444	cell division protein SepF	407	148.005	123	43.6085	1.76297	3.22297e-38	9.21231e-38	up
BLT_RS0108175	888	recombinase XerC	1564	284.373	545	96.6123	1.55751	4.78217e-119	2.38982e-118	up
BLT_RS0119745	285	molecular chaperone GroES	133	75.348	43	23.7505	1.66561	1.25106e-12	2.29584e-12	up
BLT_RS0104195	1689	hypothetical protein	524	50.0918	168	15.6577	1.6777	1.51122e-45	4.60197e-45	up
BLT_RS0116080	264	hypothetical protein	73	44.6461	157	93.6148	-1.0682	6.04753e-08	9.70125e-08	down
BLT_RS0107835	888	aspartate carbamoyltransferase catalytic subunit	72	13.0914	204	36.1631	-1.4659	2.57311e-15	5.07493e-15	down
BLT_RS0116255	459	hypothetical protein	116	40.8047	34	11.6604	1.80711	2.22828e-12	4.06542e-12	up
BLT_RS0112095	672	hypothetical protein	1424	342.142	677	158.587	1.10932	4.22413e-65	1.51932e-64	up
BLT_RS22785	195	hypothetical protein	28606	23685.8	98984	79905.9	-1.75428	0	0	down
BLT_RS0113810	798	hypothetical protein	2455	496.722	7844	1547.33	-1.63927	0	0	down
BLT_RS0116640	780	hypothetical protein	4283	886.581	690	139.253	2.67055	0	0	up
BLT_RS0104720	315	thioredoxin	6315	3236.89	2172	1085.42	1.57635	0	0	up
BLT_RS0115705	1494	glycerol kinase	2594	280.34	1186	124.963	1.16567	1.42482e-126	7.45612e-126	up
BLT_RS0115565	843	hypothetical protein	3102	594.127	1014	189.347	1.64974	3.05129e-254	2.51365e-253	up
BLT_RS0112980	207	hypothetical protein	58	45.24	211	160.458	-1.82652	4.66864e-21	1.03191e-20	down
BLT_RS22620	615	hypothetical protein	614	161.198	270	69.1094	1.22187	1.26551e-33	3.38637e-33	up
BLT_RS0118285	1746	hypothetical protein	547	50.5834	92	8.29454	2.60843	9.76104e-82	3.96431e-81	up
BLT_RS0102605	201	hypothetical protein	40	32.1314	247	193.441	-2.58984	1.03737e-36	2.86949e-36	down
BLT_RS0104775	225	LuxR family transcriptional regulator	13923	9991.15	4674	3270.05	1.61134	0	0	up
BLT_RS0107755	924	hypothetical protein	238	41.5882	85	14.4809	1.52202	5.72785e-19	1.21207e-18	up
BLT_RS0106090	2175	DNA topoisomerase III	307	22.79	143	10.3496	1.13882	6.4795e-16	1.29418e-15	up
BLT_RS0110635	909	hypothetical protein	1921	341.215	402	69.6163	2.29319	1.83122e-243	1.47949e-242	up
BLT_RS0120735	510	hypothetical protein	428	135.5	50	15.4329	3.13421	4.59745e-77	1.79381e-76	up
BLT_RS0114520	234	hypothetical protein	448	309.12	10	6.72718	5.52202	1.20282e-108	5.72288e-108	up
BLT_RS0114845	267	transposase	57	34.469	26	15.3289	1.16905	0.000377588	0.000520131	up
BLT_RS0101340	723	hypothetical protein	168	37.5177	66	14.3699	1.38452	3.31311e-12	6.00113e-12	up
BLT_RS0109805	1242	hypothetical protein	585	76.05	233	29.5313	1.3647	8.26735e-38	2.33653e-37	up
BLT_RS0113500	1110	hypothetical protein	460	66.9114	1022	144.936	-1.11509	1.8284e-46	5.62687e-46	down
BLT_RS0105980	180	hypothetical protein	295	264.615	1231	1076.55	-2.02445	4.55334e-131	2.44031e-130	down
BLT_RS0113700	861	hypothetical protein	318	59.6333	988	180.635	-1.59889	7.427e-77	2.89484e-76	down
BLT_RS21980	375	hypothetical protein	46	19.8058	345	144.823	-2.8703	3.60207e-56	1.21021e-55	down
BLT_RS0111280	390	hypothetical protein	747	309.258	2762	1114.83	-1.84994	7.24998e-259	6.06522e-258	down
BLT_RS0115970	1593	hypothetical protein	862	87.3688	87	8.5971	3.3452	3.89939e-162	2.37297e-161	up
BLT_RS0100600	1467	hypothetical protein	9053	996.386	3087	331.249	1.58879	0	0	up
BLT_RS0113705	1227	hypothetical protein	247	32.5026	116	14.882	1.12698	6.62965e-13	1.22616e-12	up
BLT_RS0107535	501	hypothetical protein	130	41.8958	38	11.9397	1.81104	9.91789e-14	1.88041e-13	up
BLT_RS0113040	900	GTP cyclohydrolase	247	44.3118	2294	401.236	-3.17869	0	0	down
BLT_RS0101250	1494	hypothetical protein	685	74.0295	2621	276.163	-1.89935	1.39005e-254	1.15014e-253	down
BLT_RS0112650	1182	hypothetical protein	507	69.2557	144	19.1776	1.85251	2.2354e-50	7.11743e-50	up
BLT_RS0117695	687	5-formyltetrahydrofolate cyclo-ligase	5145	1209.19	14509	3324.52	-1.45911	0	0	down
BLT_RS0106505	2568	ribonucleotide-diphosphate reductase	7836	492.679	1876	114.997	2.09905	0	0	up
BLT_RS21365	768	hypothetical protein	2575	541.354	281	57.5962	3.23253	0	0	up
BLT_RS0115510	360	hypothetical protein	376	168.636	108	47.2248	1.8363	2.20258e-37	6.15807e-37	up
BLT_RS0119330	525	hypothetical protein	241	74.1178	2304	690.831	-3.22044	0	0	down
BLT_RS0101285	1113	transposase	739	107.205	194	27.4382	1.96611	1.84411e-78	7.27806e-78	up
BLT_RS0112185	1263	glutamate dehydrogenase	3658	467.633	8063	1004.94	-1.10367	0	0	down
BLT_RS0114420	561	hypothetical protein	401	115.411	22	6.17317	4.22462	1.39669e-89	6.0502e-89	up
BLT_RS21910	1476	phosphodiesterase	258	28.2227	129	13.7579	1.0366	6.75642e-12	1.2168e-11	up
BLT_RS0113990	1488	hypothetical protein	282	30.5993	86	9.09796	1.74988	9.79218e-27	2.37441e-26	up
BLT_RS0114450	231	hypothetical protein	114	79.6816	0.5	0.340727	7.86949	3.02889e-26	7.27899e-26	up
BLT_RS0107170	1005	hypothetical protein	272	43.6986	2821	441.861	-3.33793	0	0	down
BLT_RS0103060	852	ABC transporter ATP-binding protein	1344	254.698	159	29.3769	3.11603	1.6161e-236	1.28912e-235	up
BLT_RS0112645	639	stage II sporulation protein M	274	69.2333	86	21.1859	1.70836	3.2322e-25	7.67953e-25	up
BLT_RS0101415	1081	hypothetical protein	1548	231.212	264	38.4439	2.58839	8.59638e-226	6.70127e-225	up
BLT_RS0113985	453	hypothetical protein	80	28.5139	31	10.7724	1.40433	1.1889e-06	1.81388e-06	up
BLT_RS0107620	1230	hypothetical protein	542	71.1474	2470	316.112	-2.15155	7.45917e-282	6.66906e-281	down
BLT_RS0103985	249	hypothetical protein	655	424.724	1741	1100.65	-1.37375	2.54352e-107	1.20259e-106	down
BLT_RS0120410	717	N-acetylmuramoyl-L-alanine amidase	2541	572.204	722	158.514	1.85192	9.65546e-245	7.85131e-244	up
BLT_RS0116450	1239	saccharopine dehydrogenase	3590	467.83	1024	130.1	1.84636	0	0	up
BLT_RS0118365	1134	hypothetical protein	239	34.0291	587	81.4843	-1.25975	6.45425e-33	1.70891e-32	down
BLT_RS0120860	468	hypothetical protein	45	15.525	126	42.3812	-1.44883	7.16876e-10	1.21727e-09	down
BLT_RS0117475	1044	hypothetical protein	295	45.6233	33	4.97579	3.19677	1.27435e-54	4.22505e-54	up
BLT_RS0118895	309	ArsR family transcriptional regulator	1214	634.345	229	116.661	2.44294	1.94711e-166	1.20236e-165	up
BLT_RS0120610	435	50S ribosomal protein L16	3397	1260.87	811	293.481	2.10308	0	0	up
BLT_RS22020	372	RNA polymerase subunit sigma-70	1603	695.754	131	55.4341	3.64973	0	0	up
BLT_RS0102020	1227	hypothetical protein	461	60.6627	1228	157.544	-1.37688	1.62603e-76	6.31173e-76	down
BLT_RS0120475	393	30S ribosomal protein S9	1068	438.777	3880	1554.13	-1.82455	0	0	down
BLT_RS0120005	363	hypothetical protein	375	166.798	9	3.90287	5.41742	4.43407e-91	1.93631e-90	up
BLT_RS21965	965	hypothetical protein	316	52.8719	746	121.691	-1.20266	1.40339e-38	4.0205e-38	down
BLT_RS0106200	1512	cardiolipin synthase	2289	244.433	5517	574.381	-1.23257	3.43721e-284	3.09513e-283	down
BLT_RS0108970	135	selenoprotein	76	90.896	26	30.3171	1.58408	2.25827e-07	3.53987e-07	up
BLT_RS0118105	255	hypothetical protein	63	39.8901	0.5	0.308659	7.01388	3.80889e-16	7.63599e-16	up
BLT_RS0115985	1176	hypothetical protein	735	100.913	192	25.7006	1.97323	2.07371e-78	8.17567e-78	up
BLT_RS0114550	1485	portal protein	1440	156.567	34	3.60414	5.44099	0	0	up
BLT_RS0114645	189	hypothetical protein	49	41.86	0.5	0.416444	6.65131	4.07196e-13	7.59067e-13	up
BLT_RS0113355	1293	hypothetical protein	1847	230.639	590	71.8294	1.68299	1.57304e-156	9.39096e-156	up
BLT_RS22095	354	RNA polymerase subunit sigma-70	1026	467.96	58	25.7913	4.18143	7.56209e-225	5.84668e-224	up
BLT_RS0106250	693	hypothetical protein	1415	329.677	9110	2069.35	-2.65005	0	0	down
BLT_RS0117580	450	hypothetical protein	57	20.4516	329	115.089	-2.49246	2.30256e-46	7.08031e-46	down
BLT_RS0120225	267	hypothetical protein	11199	6772.25	4731	2789.27	1.27975	0	0	up
BLT_RS0112695	840	hypothetical protein	381	73.2337	137	25.6738	1.51221	3.91275e-29	9.90794e-29	up
BLT_RS0100530	393	hypothetical protein	121	49.7116	30	12.0165	2.04857	6.49511e-15	1.26777e-14	up
BLT_RS0118375	291	hypothetical protein	60	33.2907	279	150.925	-2.18064	5.21568e-34	1.40262e-33	down
BLT_RS0115710	831	glycerol transporter	1038	201.679	496	93.957	1.10199	1.89148e-47	5.87853e-47	up
BLT_RS0104695	1698	long-chain fatty acid--CoA ligase	5896	560.641	1715	158.992	1.81812	0	0	up
BLT_RS0119810	1014	cytochrome D ubiquinol oxidase subunit II	3443	548.232	305	47.349	3.53338	0	0	up
BLT_RS0114800	657	hypothetical protein	1218	299.328	390	93.4432	1.67956	1.33926e-103	6.23832e-103	up
BLT_RS0112020	204	hypothetical protein	335	265.143	958	739.238	-1.47927	9.69715e-67	3.5316e-66	down
BLT_RS0101050	225	hypothetical protein	21	15.0696	57	39.8787	-1.40398	5.17144e-05	7.42178e-05	down
BLT_RS21305	306	antibiotic biosynthesis monooxygenase	193	101.836	61	31.3803	1.69832	4.28147e-18	8.93967e-18	up
BLT_RS0117345	642	hypothetical protein	279	70.1672	85	20.8417	1.75133	1.69544e-26	4.09271e-26	up
BLT_RS0106160	231	hypothetical protein	47	32.8512	11	7.496	2.13175	6.28019e-07	9.69524e-07	up
BLT_RS0110830	585	hypothetical protein	9317	2571.49	464	124.856	4.36426	0	0	up
BLT_RS0110470	879	DNA methyltransferase	1478	271.488	684	122.494	1.14817	3.07759e-71	1.14514e-70	up
BLT_RS0104970	2643	valine--tRNA ligase	1580	96.5217	750	44.6697	1.11156	2.92845e-72	1.1005e-71	up
BLT_RS0107530	1083	hypothetical protein	293	43.6822	60	8.7211	2.32446	2.55385e-39	7.3611e-39	up
BLT_RS0108260	216	hypothetical protein	159	118.853	57	41.5403	1.51659	4.07676e-13	7.59585e-13	up
BLT_RS0116345	1347	hypothetical protein	1271	152.35	266	31.0858	2.29306	9.02778e-162	5.485e-161	up
BLT_RS0112090	672	hypothetical protein	4164	1000.48	1163	272.433	1.87671	0	0	up
BLT_RS0116295	615	NAD(P)H:quinone oxidoreductase type IV	2779	729.589	231	59.127	3.6252	0	0	up
BLT_RS21200	132	transposase	27	33.0259	7	8.34781	1.98413	0.000311074	0.000431184	up
BLT_RS21320	1071	hypothetical protein	4485	676.142	651	95.6842	2.82097	0	0	up
BLT_RS0110150	192	hypothetical protein	358	301.056	19	15.5776	4.27248	1.20456e-80	4.84519e-80	up
BLT_RS0106580	438	3-dehydroquinate dehydratase	116	42.7611	690	247.984	-2.53588	4.62041e-97	2.08277e-96	down
BLT_RS0117940	744	hypothetical protein	151	32.7694	29	6.13584	2.41702	5.56477e-22	1.25199e-21	up
BLT_RS0108575	1299	zinc protease	1273	158.228	458	55.5015	1.51141	3.82811e-93	1.69724e-92	up
BLT_RS0107455	930	hypothetical protein	685	118.925	3148	532.844	-2.16366	0	0	down
BLT_RS0102985	747	carboxylesterase	671	145.033	193	40.6711	1.83431	3.14309e-65	1.13265e-64	up
BLT_RS0108330	636	hypothetical protein	1017	258.184	519	128.457	1.00711	2.13264e-40	6.2424e-40	up
BLT_RS0107505	558	membrane protein	592	171.298	85	23.9791	2.83666	2.5878e-96	1.16235e-95	up
BLT_RS0113845	714	hypothetical protein	217	49.0712	62	13.6692	1.84395	2.15802e-22	4.8785e-22	up
BLT_RS0100590	1659	oligo-1,6-glucosidase	2465	239.903	6421	609.263	-1.34461	0	0	down
BLT_RS0109980	429	MarR family transcriptional regulator	1488	560.029	610	223.832	1.32309	3.79426e-89	1.63609e-88	up
BLT_RS0108500	879	dihydrofolate reductase	1718	315.573	200	35.8171	3.13925	8.7001e-304	8.41679e-303	up
BLT_RS0103335	240	hypothetical protein	414	278.519	2101	1378.05	-2.30678	2.64926e-261	2.23117e-260	down
BLT_RS0104015	318	hypothetical protein	298	151.305	1317	651.94	-2.10728	2.21509e-147	1.27014e-146	down
BLT_RS21265	741	hypothetical protein	615	134.005	2383	506.238	-1.91753	1.33735e-234	1.06452e-233	down
BLT_RS0108275	1242	hypothetical protein	963	125.19	452	57.2882	1.12781	9.20841e-46	2.8155e-45	up
BLT_RS0116695	2841	hypothetical protein	930	52.8539	230	12.744	2.05219	8.80722e-104	4.1075e-103	up
BLT_RS0104800	447	MarR family transcriptional regulator	1898	685.573	273	96.1399	2.8341	4.65852e-304	4.53005e-303	up
BLT_RS0119970	1161	hypothetical protein	500	69.5349	1911	259.106	-1.89773	5.71828e-186	3.79843e-185	down
BLT_RS22790	195	hypothetical protein	28767	23819.1	99026	79939.8	-1.7468	0	0	down
BLT_RS0114705	195	hypothetical protein	103	85.284	18	14.5307	2.55317	2.17952e-16	4.39515e-16	up
BLT_RS0114815	267	hypothetical protein	626	378.554	210	123.81	1.61237	3.51292e-51	1.12324e-50	up
BLT_RS0107795	774	hypothetical protein	904	188.579	270	54.9125	1.77996	8.89603e-84	3.66427e-83	up
BLT_RS0107400	891	3-hydroxyisobutyrate dehydrogenase	313	56.7194	98	17.314	1.7119	1.1904e-28	2.98232e-28	up
BLT_RS0108230	438	hypothetical protein	213	78.5182	73	26.236	1.58148	4.88226e-18	1.01828e-17	up
BLT_RS0100105	714	hypothetical protein	675	152.641	202	44.535	1.77713	6.84043e-63	2.43481e-62	up
BLT_RS22640	327	hypothetical protein	102	50.3637	26	12.5163	2.00858	1.6061e-12	2.94023e-12	up
BLT_RS22070	786	hypothetical protein	526	108.051	30	6.00824	4.16862	4.55566e-116	2.2498e-115	up
BLT_RS0107425	339	hypothetical protein	769	366.262	246	114.231	1.68092	3.54412e-66	1.287e-65	up
BLT_RS0106985	216	hypothetical protein	30	22.425	9	6.559	1.77356	0.000425349	0.000584003	up
BLT_RS0105415	516	general stress protein	822	257.21	2127	648.883	-1.33501	3.60049e-125	1.86347e-124	down
BLT_RS0117825	846	nitrate/sulfonate/bicarbonate ABC transporter ATP-binding protein	2046	390.481	137	25.4917	3.93715	0	0	up
BLT_RS0108955	735	hypothetical protein	1051	230.877	263	56.3271	2.03522	8.37551e-116	4.13082e-115	up
BLT_RS0102930	255	phosphate ABC transporter permease	1910	1209.37	5250	3240.92	-1.42215	0	0	down
BLT_RS0106595	243	hypothetical protein	25614	17019.1	176560	114376	-2.74856	0	0	down
BLT_RS0100550	765	hypothetical protein	111	23.4275	549	112.969	-2.26965	2.06692e-68	7.60085e-68	down
BLT_RS0110685	939	pyrophosphatase	698	120.02	2005	336.122	-1.48571	1.77901e-138	9.88545e-138	down
BLT_RS21235	809	hypothetical protein	57	11.376	144	28.0196	-1.30044	1.30247e-09	2.19386e-09	down
BLT_RS0113010	1038	hypothetical protein	979	152.283	304	46.1025	1.72383	1.06122e-86	4.48877e-86	up
BLT_RS0105750	2160	methylmalonyl-CoA mutase	2271	169.757	5518	402.139	-1.24422	1.93211e-288	1.7651e-287	down
BLT_RS0111240	324	hypothetical protein	98	48.8367	250	121.463	-1.31448	7.57928e-16	1.51065e-15	down
BLT_RS0112030	1041	hypothetical protein	440	68.2444	184	27.8238	1.29439	9.94271e-27	2.40937e-26	up
BLT_RS0118290	312	hypothetical protein	208	107.64	83	41.8767	1.362	1.97372e-14	3.81108e-14	up
BLT_RS0117570	369	urease subunit beta	46	20.1278	100	42.6601	-1.0837	1.21712e-05	1.79242e-05	down
BLT_RS0109555	801	IclR family transcriptional regulator	3344	674.06	188	36.9466	4.18937	0	0	up
BLT_RS0107450	513	hypothetical protein	481	151.388	1004	308.081	-1.02505	4.7899e-40	1.39447e-39	down
BLT_RS0107750	1134	cell division protein FtsZ	1332	189.651	659	91.4789	1.05184	4.15031e-56	1.39192e-55	up
BLT_RS0106330	1044	hypothetical protein	143	22.1157	68	10.2531	1.109	6.74214e-08	1.07971e-07	up
BLT_RS0118900	912	cation transporter	3999	707.981	1486	256.491	1.4648	2.38771e-275	2.07099e-274	up
BLT_RS21660	501	hypothetical protein	100	32.2276	892	280.269	-3.12045	5.72322e-154	3.3793e-153	down
BLT_RS0102210	293	capsular biosynthesis protein	21	11.5722	115	61.7844	-2.41658	1.01115e-16	2.05442e-16	down
BLT_RS0120500	837	energy-coupling factor transporter ATPase	384	74.0749	135	25.3897	1.54474	3.13472e-30	8.07325e-30	up
BLT_RS0120455	1974	hypothetical protein	3853	315.15	313	24.9601	3.65834	0	0	up
BLT_RS0108300	777	flagellar biosynthesis protein FliR	245	50.9108	115	23.2984	1.12774	7.97412e-13	1.47121e-12	up
BLT_RS22545	209	crotonase	295	227.898	63	47.4507	2.26389	2.16691e-38	6.20316e-38	up
BLT_RS0114010	1257	hypothetical protein	871	111.879	175	21.9155	2.35191	7.47607e-115	3.65852e-114	up
BLT_RS0111190	1278	hypothetical protein	5296	669.086	2107	259.527	1.36631	0	0	up
BLT_RS21370	1140	FAD-binding protein	5632	797.669	744	102.735	2.95687	0	0	up
BLT_RS0111860	672	cytochrome B6	1826	438.729	441	103.304	2.08643	3.92249e-206	2.77665e-205	up
BLT_RS0101395	423	hypothetical protein	1610	614.541	189	70.3348	3.1272	7.8371e-284	7.04033e-283	up
BLT_RS0108320	855	hypothetical protein	2083	393.358	6368	1172.43	-1.57558	0	0	down
BLT_RS0113335	219	hypothetical protein	192	141.554	69	49.5968	1.51303	1.77079e-15	3.50719e-15	up
BLT_RS0114915	1452	glucose-6-phosphate dehydrogenase	212	23.5741	74	8.02258	1.55506	1.45777e-17	3.01462e-17	up
BLT_RS0117395	954	hypothetical protein	546	92.4079	1876	309.552	-1.74409	6.83961e-163	4.1757e-162	down
BLT_RS0119850	1938	multidrug ABC transporter ATP-binding protein	2510	209.115	1039	84.3938	1.30909	1.19588e-146	6.81578e-146	up
BLT_RS0106920	363	hypothetical protein	930	413.658	83	35.9932	3.52264	3.77659e-182	2.4738e-181	up
BLT_RS22150	1941	hypothetical protein	383	31.8595	55	4.46052	2.83644	5.73073e-63	2.04174e-62	up
BLT_RS0118270	690	geranylgeranylglyceryl phosphate synthase	96	22.464	26	5.93161	1.92112	2.8192e-11	4.99617e-11	up
BLT_RS0100940	507	DNA-directed RNA polymerase subunit delta	2718	865.579	1297	402.699	1.10396	1.31893e-121	6.72478e-121	up
BLT_RS0108690	1632	dimethylallyladenosine tRNA methylthiotransferase	2439	241.3	779	75.1391	1.68319	4.38851e-206	3.09492e-205	up
BLT_RS0120570	537	50S ribosomal protein L6	3602	1083.02	1426	418.017	1.37342	1.96199e-225	1.52317e-224	up
BLT_RS0103540	1836	3-octaprenyl-4-hydroxybenzoate carboxy-lyase	3209	282.203	17255	1479.42	-2.39022	0	0	down
BLT_RS0118680	816	hypothetical protein	218	43.1352	24	4.62988	3.21982	4.47292e-41	1.31436e-40	up
BLT_RS0112055	1050	hypothetical protein	2047	314.77	517	77.5086	2.02187	9.35704e-222	7.14658e-221	up
BLT_RS0119825	1116	MFS transporter	1733	250.726	350	49.3688	2.34444	1.12367e-225	8.74149e-225	up
BLT_RS0106480	375	hypothetical protein	145	62.4312	470	197.295	-1.66001	1.77908e-39	5.13972e-39	down
BLT_RS0118300	1743	adenine deaminase	2364	218.985	1013	91.4873	1.25919	3.02516e-130	1.60759e-129	up
BLT_RS0108945	951	hypothetical protein	1168	198.302	229	37.9056	2.38722	5.09691e-156	3.03802e-155	up
BLT_RS0110295	2082	hypothetical protein	450	34.8977	184	13.9119	1.32681	2.67726e-28	6.66314e-28	up
BLT_RS0105010	1656	hypothetical protein	120	11.7	364	34.6011	-1.56431	1.48667e-28	3.71963e-28	down
BLT_RS0102355	1533	hypothetical protein	1508	158.827	3758	385.89	-1.28073	4.27243e-206	3.0187e-205	down
BLT_RS0106040	1239	3-oxoacyl-ACP synthase	11352	1479.33	3944	501.088	1.56181	0	0	up
BLT_RS0105850	867	hypothetical protein	1086	202.244	419	76.0753	1.4106	4.13232e-72	1.54829e-71	up
BLT_RS0111580	1029	tellurite resistance protein	4166	653.686	21139	3233.83	-2.30658	0	0	down
BLT_RS0103415	183	hypothetical protein	503	443.795	1711	1471.8	-1.72961	4.8404e-147	2.76291e-146	down
BLT_RS0110280	1335	hypothetical protein	221	26.7286	29	3.41952	2.96652	1.07434e-38	3.08014e-38	up
BLT_RS0115975	879	hypothetical protein	635	116.641	105	18.804	2.63296	1.56479e-95	7.00352e-95	up
BLT_RS0116585	231	hypothetical protein	87	60.8096	43	29.3025	1.05327	5.40112e-05	7.74845e-05	up
BLT_RS0120430	1506	hypothetical protein	6552	702.448	583	60.9386	3.52696	0	0	up
BLT_RS0107745	1281	cell division protein FtsA	735	92.641	190	23.3482	1.98834	3.51799e-79	1.3928e-78	up
BLT_RS0113760	780	zinc ABC transporter ATP-binding protein	2416	500.112	964	194.55	1.36211	5.43017e-150	3.15201e-149	up
BLT_RS0100020	1923	DNA gyrase subunit B	2785	233.836	905	74.0829	1.65828	3.80434e-230	2.99037e-229	up
BLT_RS0104595	489	hypothetical protein	162	53.4898	68	21.8902	1.28898	9.6275e-11	1.67936e-10	up
BLT_RS0120905	219	hypothetical protein	39	28.7532	156	112.132	-1.9634	1.90591e-17	3.92094e-17	down
BLT_RS0116470	1509	hypothetical protein	934	99.9362	186	19.4032	2.36472	8.4918e-124	4.37699e-123	up
BLT_RS0116480	987	hypothetical protein	2988	488.797	1510	240.829	1.02123	8.5491e-118	4.24418e-117	up
BLT_RS0107325	420	hypothetical protein	317	121.864	677	253.739	-1.05808	6.20026e-29	1.56583e-28	down
BLT_RS0101775	228	hypothetical protein	635	449.68	5	3.4521	7.02528	2.55247e-147	1.46138e-146	up
BLT_RS0111510	3051	hypothetical protein	965	51.0682	3040	156.848	-1.61887	1.40576e-236	1.1261e-235	down
BLT_RS0115640	213	biotin/lipoyl attachment protein	123	93.2375	51	37.6911	1.30668	1.19849e-08	1.96862e-08	up
BLT_RS0114635	192	hypothetical protein	35	29.4328	2	1.63975	4.16588	3.50055e-09	5.84147e-09	up
BLT_RS0120355	318	hypothetical protein	828	420.405	169	83.6582	2.3292	4.76603e-108	2.26191e-107	up
BLT_RS0113755	867	metal ABC transporter permease	2978	554.588	1123	203.896	1.44358	3.54412e-201	2.47171e-200	up
BLT_RS0101460	837	hypothetical protein	138	26.6207	297	55.8573	-1.0692	8.865e-14	1.68248e-13	down
BLT_RS0103925	570	carbonic anhydrase	373	105.657	1098	303.233	-1.52103	2.382e-79	9.46031e-79	down
BLT_RS0116225	531	[Fe-S]-binding protein	9530	2897.77	125498	37204.1	-3.68245	0	0	down
BLT_RS0112215	528	RNA polymerase sigma factor	375	114.673	900	268.323	-1.22644	1.40552e-47	4.37903e-47	down
BLT_RS0118320	582	hypothetical protein	104	28.852	340	91.9612	-1.67236	2.575e-29	6.53361e-29	down
BLT_RS0101645	492	hypothetical protein	252	82.699	36	11.5182	2.84395	3.77111e-42	1.11947e-41	up
BLT_RS0114515	396	hypothetical protein	723	294.787	39	15.5031	4.24905	2.02669e-160	1.22543e-159	up
BLT_RS21410	1272	hypothetical protein	11307	1435.24	826	102.221	3.81153	0	0	up
BLT_RS0100750	837	hypothetical protein	383	73.882	840	157.98	-1.09645	1.64219e-37	4.60325e-37	down
BLT_RS0110825	291	hypothetical protein	212	117.627	58	31.375	1.90653	7.53296e-23	1.72567e-22	up
BLT_RS0120120	447	hypothetical protein	2507	905.549	11642	4099.86	-2.17871	0	0	down
BLT_RS0113920	399	cytidine deaminase	408	165.102	145	57.2063	1.52911	1.44843e-31	3.77933e-31	up
BLT_RS0114490	435	major tail shaft protein	605	224.559	27	9.77064	4.5225	1.33965e-138	7.45502e-138	up
BLT_RS0119640	900	ribonucleotide-diphosphate reductase subunit beta	110	19.734	424	74.1604	-1.90997	4.56929e-43	1.36934e-42	down
BLT_RS0109850	201	hypothetical protein	130	104.427	9	7.04847	3.88904	7.27949e-29	1.83593e-28	up
BLT_RS0116415	1047	hypothetical protein	185	28.5292	52	7.81817	1.86754	1.23972e-19	2.66826e-19	up
BLT_RS0107370	276	hypothetical protein	387	226.395	197	112.358	1.01073	1.83733e-16	3.71105e-16	up
BLT_RS0111215	1008	SBT type permease sodium-bicarbonate	4200	672.75	50	7.80833	6.42891	0	0	up
BLT_RS0100950	531	hypothetical protein	24	7.29763	93	27.57	-1.9176	1.04407e-10	1.82037e-10	down
BLT_RS0107730	717	hypothetical protein	412	92.7776	123	27.0044	1.78058	3.52699e-39	1.01583e-38	up
BLT_RS0102735	2874	excinuclease ABC subunit A	5437	305.448	1782	97.6045	1.64591	0	0	up
BLT_RS0106440	510	hypothetical protein	143	45.2721	416	128.402	-1.50397	1.13629e-30	2.93444e-30	down
BLT_RS0109660	870	hypothetical protein	4292	796.536	315	56.9954	3.80482	0	0	up
BLT_RS0117125	390	ectoine synthase	2247	930.258	5537	2234.9	-1.26451	8.63116e-297	8.18225e-296	down
BLT_RS0110325	1068	hypothetical protein	4972	751.666	1908	281.226	1.41836	0	0	up
BLT_RS21695	1239	hypothetical protein	4182	544.976	1906	242.159	1.17024	4.1963e-204	2.94835e-203	up
BLT_RS0107495	621	cytochrome B oxidoreductase	2444	635.44	593	150.318	2.07974	4.50883e-274	3.90179e-273	up
BLT_RS0109995	420	hypothetical protein	1444	555.115	255	95.574	2.5381	2.92236e-206	2.07257e-205	up
BLT_RS0118315	1536	IMP cyclohydrolase	128	13.455	347	35.5621	-1.4022	1.90907e-23	4.41085e-23	down
BLT_RS0106410	456	hypothetical protein	94	33.2834	34	11.7372	1.50372	2.99418e-08	4.85477e-08	up
BLT_RS0109610	1782	phosphomethylpyrimidine synthase	424	38.417	1404	124.025	-1.69081	2.84163e-117	1.40887e-116	down
BLT_RS0117235	1176	carbohydrate hydrolase	384	52.7216	143	19.1416	1.46169	5.47732e-28	1.35692e-27	up
BLT_RS0102490	1215	flagellar hook-associated protein 3	1529	203.187	584	75.6633	1.42514	2.69229e-102	1.24181e-101	up
BLT_RS0110190	816	hypothetical protein	354	70.0452	126	24.3069	1.52692	1.4893e-27	3.66067e-27	up
BLT_RS0115980	738	3-oxoacyl-ACP synthase	512	112.016	46	9.81183	3.51303	5.78539e-101	2.64906e-100	up
BLT_RS0120690	3543	DNA-directed RNA polymerase subunit beta	16337	744.503	5013	222.728	1.74099	0	0	up
BLT_RS0108180	543	ATP-dependent protease	1044	310.431	370	107.263	1.53312	2.57168e-78	1.01283e-77	up
BLT_RS0112675	1620	carbon starvation protein CstA	14259	1421.15	3239	314.735	2.17485	0	0	up
BLT_RS0115070	708	membrane protein	390	88.9399	153	34.0179	1.38654	2.35407e-26	5.66088e-26	up
BLT_RS0107415	186	hypothetical protein	117	101.564	13	11.0022	3.20652	9.69227e-23	2.20827e-22	up
BLT_RS0110660	240	hypothetical protein	407	273.809	92	60.3428	2.18192	4.64083e-50	1.47018e-49	up
BLT_RS0120565	363	50S ribosomal protein L18	2035	905.155	844	366.003	1.30631	6.95891e-119	3.47301e-118	up
BLT_RS0102475	261	hypothetical protein	824	509.744	310	186.969	1.44697	3.08069e-57	1.04905e-56	up
BLT_RS0107315	1512	glycine/betaine ABC transporter permease	610	65.1393	291	30.2963	1.10439	1.10409e-28	2.76792e-28	up
BLT_RS0104365	297	hypothetical protein	443	240.831	193	102.294	1.2353	4.02051e-25	9.5405e-25	up
BLT_RS0103075	345	hypothetical protein	3886	1818.65	928	423.426	2.10268	0	0	up
BLT_RS0103705	894	6-phosphogluconate dehydrogenase	224	40.4553	29	5.10633	2.98597	1.95612e-39	5.64255e-39	up
BLT_RS0101090	1242	serine hydroxymethyltransferase	3356	436.28	20061	2542.61	-2.54298	0	0	down
BLT_RS0118340	1561	phosphoribosylglycinamide synthetase	228	23.5829	567	57.178	-1.27772	1.58505e-32	4.17916e-32	down
BLT_RS0120265	561	hypothetical protein	271	77.9958	111	31.1465	1.32433	1.24425e-17	2.57801e-17	up
BLT_RS21140	376	acetyl-CoA acetyltransferase	641	275.255	118	49.4018	2.47813	3.03395e-90	1.32031e-89	up
BLT_RS0120740	750	hypothetical protein	565	121.633	77	16.1614	2.91192	2.0826e-94	9.2661e-94	up
BLT_RS0101995	1455	nucleotidyltransferase	2113	234.478	5249	567.887	-1.27615	1.76623e-285	1.59425e-284	down
BLT_RS0115885	1257	hypothetical protein	511	65.6373	150	18.7847	1.80496	4.7382e-49	1.48853e-48	up
BLT_RS0100030	1122	recombinase F	852	122.606	221	31.0062	1.9834	3.43089e-91	1.49997e-90	up
BLT_RS0113795	264	hypothetical protein	1265	773.663	4606	2746.43	-1.82778	0	0	down
BLT_RS0118800	513	hypothetical protein	101	31.7884	43	13.1947	1.26854	4.47458e-07	6.939e-07	up
BLT_RS0116595	1387	hypothetical protein	1489	173.334	126	14.3002	3.59944	3.59156e-295	3.37929e-294	up
BLT_RS22605	1308	hypothetical protein	2015	248.732	941	113.248	1.13511	1.0162e-94	4.52672e-94	up
BLT_RS0114435	390	hypothetical protein	340	140.76	3	1.21089	6.86102	1.55028e-80	6.22919e-80	up
BLT_RS0113115	819	hypothetical protein	162	31.9372	71	13.6466	1.2267	4.76151e-10	8.12536e-10	up
BLT_RS0111395	1137	hypothetical protein	478	67.8785	235	32.5354	1.06095	1.72466e-21	3.84356e-21	up
BLT_RS0109735	183	hypothetical protein	679	599.079	263	226.232	1.40494	1.70095e-45	5.17556e-45	up
BLT_RS0101400	339	cation:proton antiporter	1210	576.303	143	66.4026	3.11752	3.07764e-213	2.25474e-212	up
BLT_RS0112500	1089	hypothetical protein	6863	1017.54	857	123.88	3.03807	0	0	up
BLT_RS0105930	597	hypothetical protein	2047	553.616	497	131.048	2.07879	9.26068e-230	7.26415e-229	up
BLT_RS0113150	1077	sulfate permease	21638	3243.89	1113	162.678	4.31764	0	0	up
BLT_RS0113525	1416	aspartate ammonia-lyase	8465	965.225	70084	7791.2	-3.01291	0	0	down
BLT_RS0101475	858	hypothetical protein	548	103.124	4369	801.574	-2.95846	0	0	down
BLT_RS0113690	783	hypothetical protein	261	53.82	1191	239.441	-2.15346	4.06698e-137	2.2401e-136	down
BLT_RS0117485	792	crotonase	7609	1551.2	1353	268.919	2.52814	0	0	up
BLT_RS0111610	222	hypothetical protein	640	465.47	199	141.107	1.7219	3.11977e-57	1.0614e-56	up
BLT_RS0105870	825	membrane protein	261	51.0801	642	122.498	-1.26193	6.20396e-36	1.70113e-35	down
BLT_RS0101765	549	carbonate dehydratase	1224	359.976	30	8.60196	5.38709	1.63938e-292	1.52726e-291	up
BLT_RS0108235	570	hypothetical protein	339	96.0262	89	24.579	1.966	5.88663e-37	1.63672e-36	up
BLT_RS0117795	1560	4-chlorobenzoate--CoA ligase	253	26.1855	45	4.54084	2.52774	1.67942e-37	4.70411e-37	up
BLT_RS0108225	1314	ATP synthase	627	77.0437	215	25.7568	1.58072	7.3327e-50	2.31517e-49	up
BLT_RS0114410	1407	hypothetical protein	1732	198.755	187	20.9217	3.24792	0	0	up
BLT_RS0118625	936	hypothetical protein	575	99.1875	68	11.4362	3.11655	2.34734e-102	1.08403e-101	up
BLT_RS0113645	609	superoxide dismutase	3593	952.588	1065	275.284	1.79093	0	0	up
BLT_RS0106245	2019	hypothetical protein	904	72.2932	2371	184.86	-1.35451	2.17105e-142	1.22625e-141	down
BLT_RS0101880	204	hypothetical protein	121	95.768	41	31.6375	1.59791	4.92589e-11	8.65645e-11	up
BLT_RS0107350	1389	two-component system sensor histidine kinase	490	56.9585	126	14.2796	1.99595	1.17218e-53	3.84576e-53	up
BLT_RS0119195	980	alcohol dehydrogenase	567	93.4162	106	17.0266	2.45588	3.05034e-79	1.20892e-78	up
BLT_RS0114470	534	hypothetical protein	1136	343.481	380	112.019	1.61649	1.04559e-91	4.5819e-91	up
BLT_RS0113490	801	phosphomethylpyrimidine kinase	591	119.13	1774	348.634	-1.54918	1.97538e-130	1.05121e-129	down
BLT_RS0119920	711	tRNA threonylcarbamoyladenosine biosynthesis protein TsaB	278	63.1306	26	5.75642	3.4551	5.74268e-55	1.91068e-54	up
BLT_RS0115440	351	hypothetical protein	551	253.46	1995	894.715	-1.81967	1.99805e-183	1.31336e-182	down
BLT_RS0103895	1587	phosphoenolpyruvate carboxykinase	89238	9079	38775	3846.13	1.23913	0	0	up
BLT_RS0108815	660	hypothetical protein	3006	735.377	9529	2272.75	-1.62788	0	0	down
BLT_RS0111415	795	hypothetical protein	401	81.4408	130	25.741	1.66169	8.29204e-35	2.25565e-34	up
BLT_RS0104875	1419	isopropylmalate isomerase	24294	2764.28	4176	463.262	2.577	0	0	up
BLT_RS0110405	375	hypothetical protein	2504	1078.12	227	95.2891	3.50007	0	0	up
BLT_RS0114615	441	hypothetical protein	80	29.2898	3	1.07086	4.77356	3.28444e-20	7.15071e-20	up
BLT_RS0111430	936	hypothetical protein	3010	519.225	544	91.4896	2.50468	0	0	up
BLT_RS22670	1482	hypothetical protein	924	100.667	468	49.7103	1.01798	1.72937e-37	4.84043e-37	up
BLT_RS0102325	1137	hypothetical protein	690	97.9837	320	44.3035	1.14512	4.64065e-34	1.24976e-33	up
BLT_RS0102400	462	transcriptional regulator	2972	1038.66	1335	454.871	1.19119	9.79535e-150	5.67709e-149	up
BLT_RS0111780	855	hypothetical protein	436	82.3352	217	39.9523	1.04323	3.01436e-19	6.42917e-19	up
BLT_RS0107665	432	cell division protein MraZ	557	208.179	1405	511.966	-1.29823	6.7797e-80	2.704e-79	down
BLT_RS0111555	246	hypothetical protein	431	282.883	137	87.6666	1.69011	3.76835e-38	1.07549e-37	up
BLT_RS21975	2274	hypothetical protein	4531	321.713	1839	127.303	1.3375	6.86468e-272	5.88646e-271	up
BLT_RS0107595	576	hypothetical protein	235	65.8735	28	7.65216	3.10576	8.77943e-43	2.62063e-42	up
BLT_RS0100085	849	MBL fold metallo-hydrolase	186	35.3729	84	15.5747	1.18344	8.85961e-11	1.54684e-10	up
BLT_RS0118910	1149	hypothetical protein	539	75.7415	148	20.2764	1.90128	2.75105e-55	9.17747e-55	up
BLT_RS22490	1731	hypothetical protein	308	28.7289	141	12.8224	1.16383	1.79449e-16	3.62841e-16	up
BLT_RS0111945	1173	chorismate synthase	617	84.9283	2140	287.187	-1.75767	1.6005e-187	1.07069e-186	down
BLT_RS22280	1005	hypothetical protein	216	34.7019	556	87.0878	-1.32746	9.0408e-34	2.42437e-33	down
BLT_RS0114920	366	HxlR family transcriptional regulator	1524	672.309	3846	1654.16	-1.2989	1.71894e-215	1.27418e-214	down
BLT_RS0115420	1587	AMP-dependent synthetase	8158	829.988	3018	299.358	1.47122	0	0	up
BLT_RS0108920	195	hypothetical protein	44	36.432	724	584.457	-4.00382	1.63915e-151	9.54399e-151	down
BLT_RS0109615	516	hypothetical protein	66	20.6519	31	9.45716	1.12679	0.000203607	0.000284417	up
BLT_RS0103290	924	homoserine kinase	10477	1830.75	4877	830.863	1.13976	0	0	up
BLT_RS0118255	2188	ATP-dependent DNA helicase PcrA	630	46.4899	132	9.49676	2.29141	4.23231e-81	1.71152e-80	up
BLT_RS0111735	1293	asparaginyl-tRNA synthase	378	47.2018	2907	353.912	-2.90648	0	0	down
BLT_RS0101335	474	hypothetical protein	140	47.6886	40	13.284	1.84395	5.3431e-15	1.04616e-14	up
BLT_RS0106215	180	hypothetical protein	27	24.219	6	5.2472	2.20652	0.000114099	0.000161416	up
BLT_RS0109655	615	hypothetical protein	306	80.3362	66	16.8934	2.24959	1.82401e-39	5.26548e-39	up
BLT_RS0113085	837	hypothetical protein	1363	262.927	530	99.678	1.39932	5.84056e-89	2.51558e-88	up
BLT_RS0111460	696	hypothetical protein	353	81.8899	148	33.4735	1.29067	1.12824e-21	2.52182e-21	up
BLT_RS0119205	1011	alcohol dehydrogenase	857	136.866	128	19.93	2.77975	9.75191e-136	5.32474e-135	up
BLT_RS0115015	273	hypothetical protein	1505	890.1	254	146.46	2.60346	5.68942e-221	4.31915e-220	up
BLT_RS0115395	717	cytochrome C biogenesis protein DsbD	997	224.513	372	81.6719	1.45889	1.06604e-69	3.94331e-69	up
BLT_RS0101390	2406	hypothetical protein	6368	427.339	1314	85.9703	2.31347	0	0	up
BLT_RS0103070	246	hypothetical protein	140	91.8878	55	35.1946	1.38452	2.05726e-10	3.55323e-10	up
BLT_RS0107265	210	hypothetical protein	263	202.209	113	84.7048	1.25534	6.53531e-16	1.30464e-15	up
BLT_RS0104010	981	hypothetical protein	661	108.792	1527	245.03	-1.17138	5.1603e-74	1.96665e-73	down
BLT_RS0109680	1413	trehalose permease IIC protein	923	105.469	464	51.6921	1.0288	4.46239e-38	1.27165e-37	up
BLT_RS0104885	1041	hypothetical protein	184	28.5386	18	2.72189	3.39023	1.95338e-36	5.3875e-36	up
BLT_RS0108450	282	hypothetical protein	174	99.6243	79	44.0988	1.17576	4.37188e-10	7.46723e-10	up
BLT_RS0100075	1704	hypothetical protein	833	78.9297	224	20.6932	1.93141	3.44875e-86	1.45387e-85	up
BLT_RS0120560	501	30S ribosomal protein S5	4452	1434.77	1717	539.487	1.41116	9.71387e-290	8.93913e-289	up
BLT_RS0106400	444	hypothetical protein	90	32.7284	11	3.89994	3.06902	3.22943e-17	6.60772e-17	up
BLT_RS0114630	567	hypothetical protein	98	27.9067	11	3.05392	3.19187	3.11494e-19	6.63617e-19	up
BLT_RS0100115	762	sporulation initiation inhibitor Soj	309	65.474	149	30.7808	1.08889	5.35932e-15	1.04879e-14	up
BLT_RS0114640	426	single-stranded DNA-binding protein	149	56.4731	8	2.95617	4.25576	1.54554e-34	4.18617e-34	up
BLT_RS0120925	957	glutathione ABC transporter permease	291	49.096	122	20.0677	1.29073	3.8112e-18	7.96656e-18	up
BLT_RS0112365	528	thiol-disulfide oxidoreductase	622	190.205	128	38.1614	2.31737	3.68984e-81	1.49375e-80	up
BLT_RS0114555	267	hypothetical protein	148	89.4984	1	0.589573	7.24605	3.04184e-35	8.29254e-35	up
BLT_RS0102090	578	hypothetical protein	119	33.2418	396	107.849	-1.69794	1.44483e-34	3.91902e-34	down
BLT_RS0115700	1665	glycerol-3-phosphate dehydrogenase	2577	249.899	496	46.8939	2.41388	0	0	up
BLT_RS0103650	822	hypothetical protein	783	153.8	384	73.5374	1.0645	2.47735e-34	6.69079e-34	up
BLT_RS0108350	1428	hypothetical protein	1174	132.741	457	50.3775	1.39776	9.27042e-77	3.60591e-76	up
BLT_RS0104190	1266	tyrosyl-tRNA synthetase	160	20.4057	73	9.07691	1.1687	2.59782e-09	4.35045e-09	up
BLT_RS0111805	1140	N-acetyl-alpha-D-glucosaminyl L-malate synthase	265	37.5324	85	11.7372	1.67705	7.46838e-24	1.74047e-23	up
BLT_RS22740	864	hypothetical protein	518	96.8013	4	0.728777	7.0534	2.46006e-120	1.24755e-119	up
BLT_RS0120710	696	50S ribosomal protein L1	4411	1023.28	9803	2217.17	-1.11552	0	0	down
BLT_RS0111835	678	zinc metallopeptidase	23372	5565.85	7279	1690.02	1.71956	0	0	up
BLT_RS22045	187	hypothetical protein	69	59.5762	3	2.52539	4.56016	2.28812e-17	4.69955e-17	up
BLT_RS0120555	189	50S ribosomal protein L30	1671	1427.51	643	535.547	1.41442	2.24678e-110	1.07714e-109	up
BLT_RS0106465	1107	glycine cleavage system protein T	114	16.6273	416	59.1554	-1.83095	4.90078e-40	1.42565e-39	down
BLT_RS0107165	642	hypothetical protein	77	19.3651	1356	332.486	-4.10176	5.20305e-286	4.71902e-285	down
BLT_RS0117785	1101	hypothetical protein	682	100.014	108	15.4413	2.69534	5.016e-105	2.35098e-104	up
BLT_RS0107395	804	hypothetical protein	306	61.4512	93	18.2086	1.75482	5.61081e-29	1.41792e-28	up
BLT_RS0100810	606	hypothetical protein	111	29.5744	265	68.837	-1.21884	5.12227e-15	1.00344e-14	down
BLT_RS0116390	546	hypothetical protein	4239	1253.53	777	224.015	2.48433	0	0	up
BLT_RS0114085	1830	elongation factor 4	3904	344.448	13111	1127.8	-1.71116	0	0	down
BLT_RS0103325	237	hypothetical protein	169	115.134	781	518.742	-2.1717	1.58575e-91	6.94088e-91	down
BLT_RS0108580	726	hypothetical protein	250	55.5992	87	18.8639	1.55944	1.6553e-20	3.61635e-20	up
BLT_RS0117730	1911	hypothetical protein	868	73.3372	444	36.5739	1.00373	1.51008e-34	4.09305e-34	up
BLT_RS0112040	1314	ribosome-associated GTPase EngA	620	76.1836	187	22.4024	1.76583	2.01859e-57	6.87997e-57	up
BLT_RS0120745	438	hypothetical protein	368	135.656	63	22.642	2.58288	5.16359e-55	1.71953e-54	up
BLT_RS0114990	930	peptidase U32	729	126.564	180	30.4676	2.05452	7.00482e-82	2.85721e-81	up
BLT_RS0110535	666	thiaminase II	3039	736.752	1306	308.687	1.25504	5.08416e-166	3.1344e-165	up
BLT_RS0102275	207	hypothetical protein	65	50.7	11	8.3651	2.59953	4.4366e-11	7.81115e-11	up
BLT_RS0116185	549	signal peptidase	8501	2500.13	35752	10251.2	-2.03572	0	0	down
BLT_RS0104405	1239	NAD-dependent malic enzyme 4	1126	146.734	422	53.6154	1.45249	5.6544e-78	2.2223e-77	up
BLT_RS0109775	543	membrane protein	3914	1163.82	1712	496.31	1.22956	1.48263e-206	1.05348e-205	up
BLT_RS0102365	768	hypothetical protein	2195	461.465	23859	4890.35	-3.40565	0	0	down
BLT_RS21750	239	heme biosynthesis protein HemY	1660	1121.44	191	125.801	3.15613	4.99761e-295	4.69055e-294	up
BLT_RS0108005	1471	hypothetical protein	878	96.3711	399	42.6981	1.17443	1.44723e-44	4.37532e-44	up
BLT_RS0120785	1374	DNA repair protein RadA	6408	753.01	934	107.006	2.81498	0	0	up
BLT_RS0121090	236	capsular biosynthesis protein	11	7.52568	40	26.6807	-1.8259	4.15089e-05	5.98446e-05	down
BLT_RS0111970	606	aromatic acid decarboxylase	494	131.619	144	37.4058	1.81504	7.90046e-48	2.46759e-47	up
BLT_RS0119690	1002	hypothetical protein	266	42.8626	52	8.16929	2.39144	5.07483e-37	1.41309e-36	up
BLT_RS0110435	996	hypothetical protein	1202	194.854	74	11.6956	4.05836	1.24116e-258	1.03375e-257	up
BLT_RS0119660	1083	hypothetical protein	425	63.3615	158	22.9656	1.46413	7.16328e-31	1.85117e-30	up
BLT_RS0113250	420	hypothetical protein	176	67.6594	70	26.236	1.36674	1.69113e-12	3.0944e-12	up
BLT_RS0113190	603	hypothetical protein	1167	312.477	314	81.9712	1.93056	6.63976e-120	3.35365e-119	up
BLT_RS0100930	636	TetR family transcriptional regulator	3101	787.245	837	207.165	1.92603	0	0	up
BLT_RS0101420	477	hypothetical protein	1650	558.51	259	85.4732	2.70804	1.76246e-252	1.44875e-251	up
BLT_RS0105950	1239	N-acetylglutamate synthase	2779	362.145	818	103.928	1.80099	1.51415e-257	1.25835e-256	up
BLT_RS0108600	495	hypothetical protein	754	245.941	279	88.7253	1.47089	8.70358e-54	2.863e-53	up
BLT_RS0116970	1299	glutamate-1-semialdehyde aminotransferase	404	50.2154	1793	217.28	-2.11335	1.2264e-200	8.53728e-200	down
BLT_RS0107990	189	50S ribosomal protein L28	770	657.8	2040	1699.09	-1.36904	8.97887e-125	4.63437e-124	down
BLT_RS0102690	873	membrane protein	156	28.852	383	69.0611	-1.2592	4.93092e-22	1.11071e-21	down
BLT_RS0109245	1161	hypothetical protein	9749	1355.79	899	121.892	3.47546	0	0	up
BLT_RS0109665	3135	Swarming motility protein SwrC	25651	1321.09	1161	58.2966	4.50217	0	0	up
BLT_RS0114505	357	hypothetical protein	509	230.205	19	8.37788	4.78019	2.01308e-119	1.01136e-118	up
BLT_RS0120615	660	30S ribosomal protein S3	4623	1130.95	1207	287.88	1.974	0	0	up
BLT_RS0116515	1689	hypothetical protein	238	22.7516	592	55.1748	-1.27804	6.72764e-34	1.80793e-33	down
BLT_RS0107355	729	hypothetical protein	451	99.8882	225	48.5852	1.0398	9.32292e-20	2.01463e-19	up
BLT_RS0111985	825	hypothetical protein	245	47.9487	63	12.0209	1.99595	1.09587e-27	2.6989e-27	up
BLT_RS0109035	639	hypothetical protein	332	83.8885	166	40.8937	1.0366	6.97298e-15	1.35894e-14	up
BLT_RS0120620	342	50S ribosomal protein L22	2798	1320.95	687	316.213	2.06261	0	0	up
BLT_RS0114005	246	hypothetical protein	247	162.116	36	23.0365	2.81504	6.14646e-41	1.80471e-40	up
BLT_RS0118460	429	hypothetical protein	2132	802.407	5096	1869.91	-1.22056	1.13478e-258	9.47239e-258	down
BLT_RS0107740	366	hypothetical protein	195	86.0238	53	22.7952	1.91601	2.82436e-21	6.27212e-21	up
BLT_RS0120450	867	ABC transporter ATP-binding protein	995	185.297	53	9.62289	4.26723	1.75583e-220	1.32495e-219	up
BLT_RS0114145	831	hypothetical protein	2852	554.132	688	130.328	2.08809	0	0	up
BLT_RS0115865	927	hypothetical protein	116	20.2043	38	6.45286	1.64665	4.81806e-11	8.47484e-11	up
BLT_RS0113330	210	hypothetical protein	143	109.947	62	46.4752	1.24227	3.45178e-09	5.76263e-09	up
BLT_RS0106425	246	membrane protein	365	239.565	96	61.4306	1.96339	1.36207e-39	3.94101e-39	up
BLT_RS0114805	594	hypothetical protein	1358	369.129	409	108.389	1.76791	9.88278e-124	5.087e-123	up
BLT_RS0103165	846	hypothetical protein	494	94.2804	1802	335.3	-1.83042	3.34254e-167	2.07766e-166	down
BLT_RS0119125	2289	hypothetical protein	914	64.4712	3196	219.791	-1.76941	1.31341e-281	1.17151e-280	down
BLT_RS0100780	978	dipeptide/oligopeptide/nickel ABC transporter ATP-binding protein	302	49.8578	60	9.65742	2.36811	2.44287e-41	7.20074e-41	up
BLT_RS0107285	1086	pyruvate dehydrogenase E1 subunit alpha	245	36.4251	94	13.6253	1.41864	1.07101e-17	2.22029e-17	up
BLT_RS0110095	1386	two-component system sensor histidine kinase	643	74.9053	122	13.8562	2.43453	9.88071e-89	4.24601e-88	up
BLT_RS0106405	327	hypothetical protein	63	31.107	17	8.1837	1.92641	6.60339e-08	1.05794e-07	up
BLT_RS0101110	393	hypothetical protein	529	217.334	129	51.6709	2.07249	1.40331e-60	4.89796e-60	up
BLT_RS0101985	1191	hypothetical protein	329	44.6015	1112	146.974	-1.7204	1.51652e-95	6.79551e-95	down
BLT_RS0104650	1035	phenylalanine--tRNA ligase subunit alpha	176	27.456	44	6.69208	2.0366	7.65282e-21	1.68264e-20	up
BLT_RS0115115	1788	aspartyl-tRNA synthetase	2867	258.896	1068	94.027	1.46123	2.85687e-197	1.97417e-196	up
BLT_RS0109675	435	hypothetical protein	104	38.6019	31	11.2181	1.78284	4.55583e-11	8.01732e-11	up
BLT_RS0116335	2052	hypothetical protein	1162	91.4311	266	20.4058	2.16371	5.0857e-138	2.82181e-137	up
BLT_RS0109060	234	hypothetical protein	290	200.1	823	553.647	-1.46824	5.65237e-57	1.91612e-56	down
BLT_RS0103340	852	diaminopimelate epimerase	3196	605.665	22354	4130.14	-2.7696	0	0	down
BLT_RS0119375	357	RsbT antagonist protein rsbS	160	72.363	358	157.857	-1.12529	1.42588e-17	2.9511e-17	down
BLT_RS0104920	1380	glutamyl-tRNA reductase	15453	1808	1067	121.712	3.89285	0	0	up
BLT_RS0102200	382	capsular biosynthesis protein	12	5.07204	54	22.2525	-2.13333	1.32247e-07	2.09738e-07	down
BLT_RS0103360	993	ferredoxin-NADP reductase	2110	343.082	631	100.03	1.77813	1.18017e-192	8.05202e-192	up
BLT_RS0107320	1083	peptidase M23	508	75.7356	2477	360.036	-2.2491	1.82335e-298	1.74164e-297	down
BLT_RS0100025	273	hypothetical protein	233	137.803	55	31.7138	2.11942	2.12084e-28	5.28878e-28	up
BLT_RS0107485	1041	cytochrome B	2518	390.544	393	59.4279	2.71627	0	0	up
BLT_RS0116140	276	hypothetical protein	145	84.825	61	34.7912	1.28577	9.85233e-10	1.6647e-09	up
BLT_RS0100990	966	fructose 1,6-bisphosphatase	516	86.2457	216	35.1986	1.29294	5.23125e-31	1.35374e-30	up
BLT_RS0104925	816	cytochrome C assembly protein	5433	1075.02	384	74.0781	3.85917	0	0	up
BLT_RS0102590	2937	hypothetical protein	9256	508.844	3939	211.121	1.26915	0	0	up
BLT_RS0114780	282	hypothetical protein	374	214.135	166	92.6633	1.20845	8.76699e-21	1.92649e-20	up
BLT_RS0101855	384	hypothetical protein	2972	1249.63	736	301.714	2.05025	0	0	up
